# Supplementary material for: Two Distinct Soil Disinfestations Differently Modify the Bacterial Communities in a Tomato Field
Source: MDPI journal article supplement (doi:10.3390/agronomy11071375), 2021-07-07
Supplement: s1 [file s1]

Archive with 6 entries (6 files):
- Supplemental Figure S1.pdf
- Supplemental Figure S2.pdf
- Supplemental Figure S3.pdf
- Supplemental Table S1.xlsx
- Supplemental Table S2.xlsx
- Supplemental Table S3.xlsx
