# Supplementary material for: Two Distinct Soil Disinfestations Differently Modify the Bacterial Communities in a Tomato Field
Source: MDPI journal article supplement (doi:10.3390/agronomy11071375), 2021-07-07
Supplement: s1 [file s1 › Supplemental Figure S2.pdf]

A

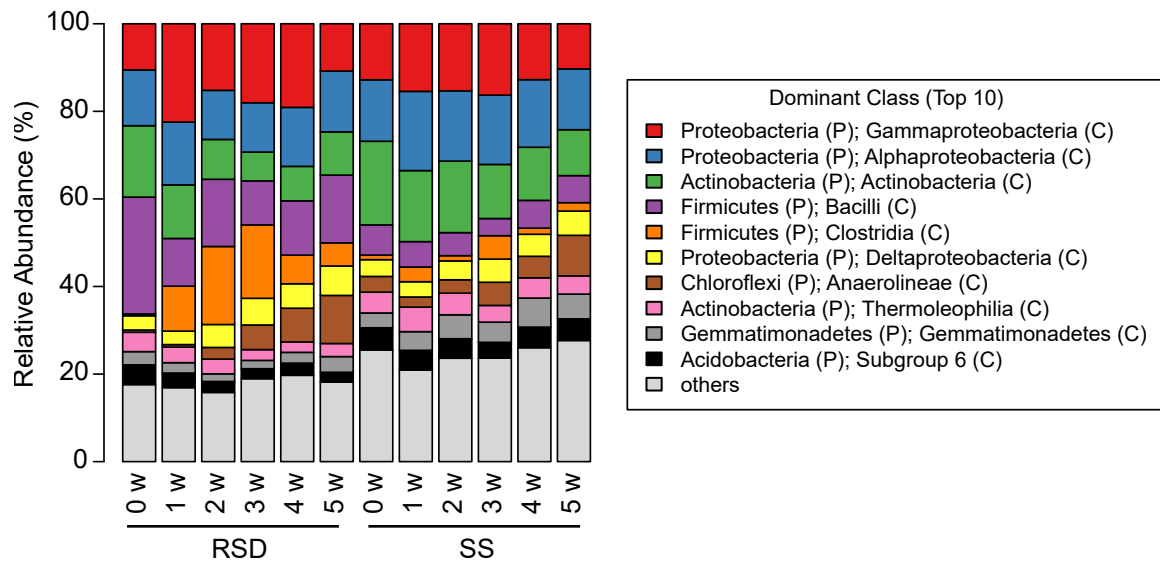

B

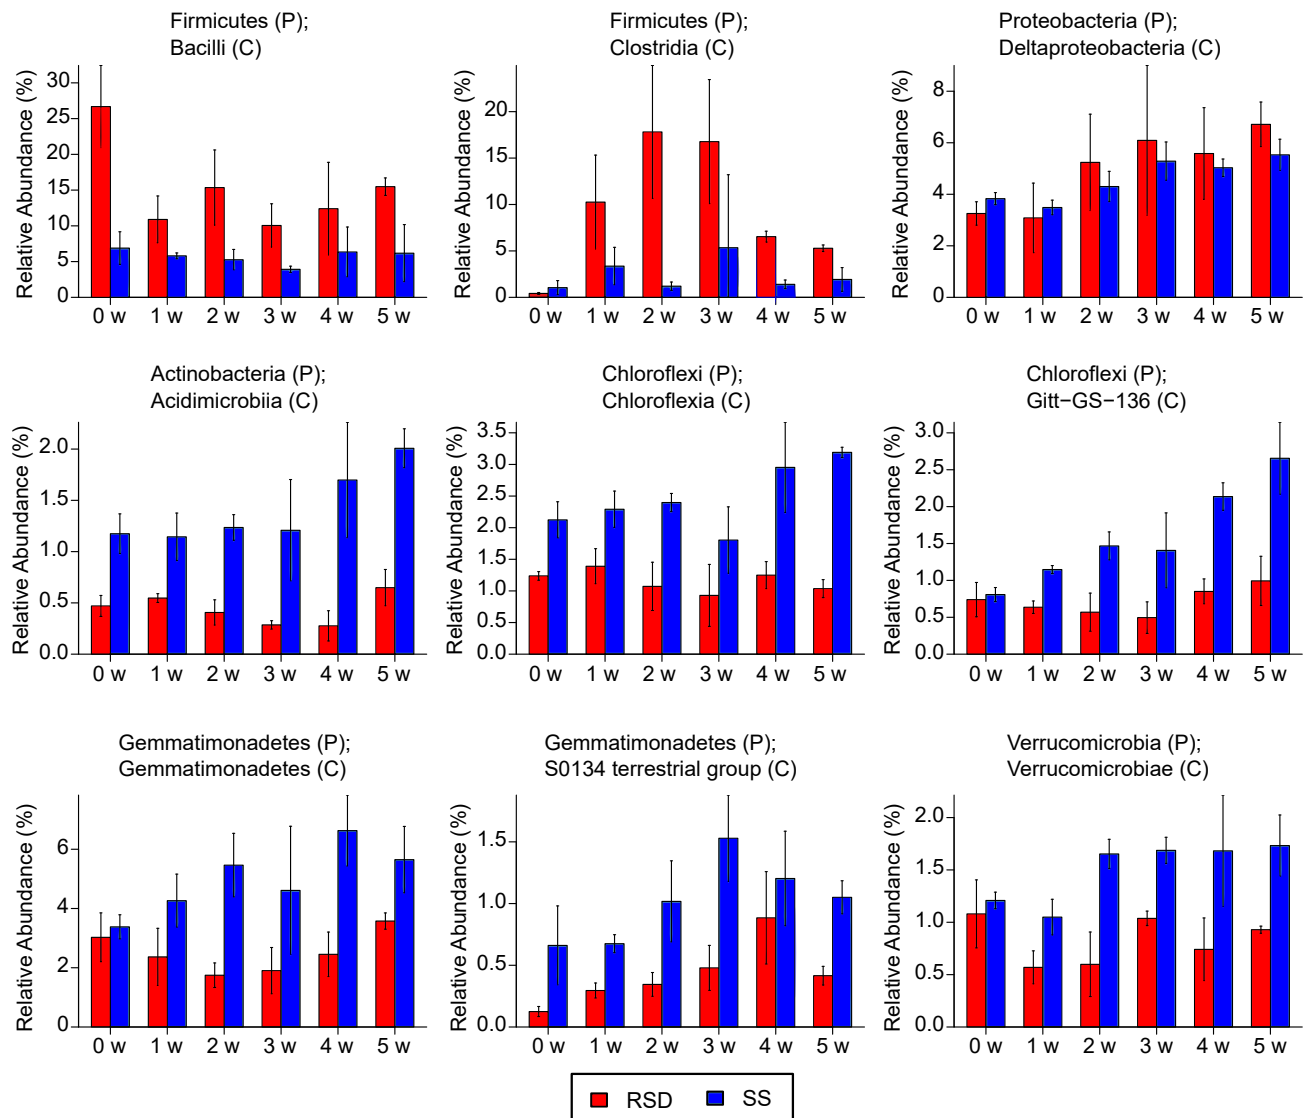

Supplemental Figure S2. Relative abundances of bacterial taxa in the soil samples under reductive soil disinfestation (RSD) and soil solarization (SS). (A) Compositions of the top 10 classes with the mean relative abundance of all soil samples. (B) Relative abundances of bacterial classes differentially abundant between RSD and SS (false discovery rate < 0.01). Red denotes RSD, whereas blue denotes SS. Values in (B) represent the averages, and error bars indicate standard deviation (n = 3). C, class level; P, phylum level; 0–5 w, treatment period for 0 to 5 weeks.
