# Supplementary material for: Two Distinct Soil Disinfestations Differently Modify the Bacterial Communities in a Tomato Field
Source: MDPI journal article supplement (doi:10.3390/agronomy11071375), 2021-07-07
Supplement: s1 [file s1 › Supplemental Figure S3.pdf]

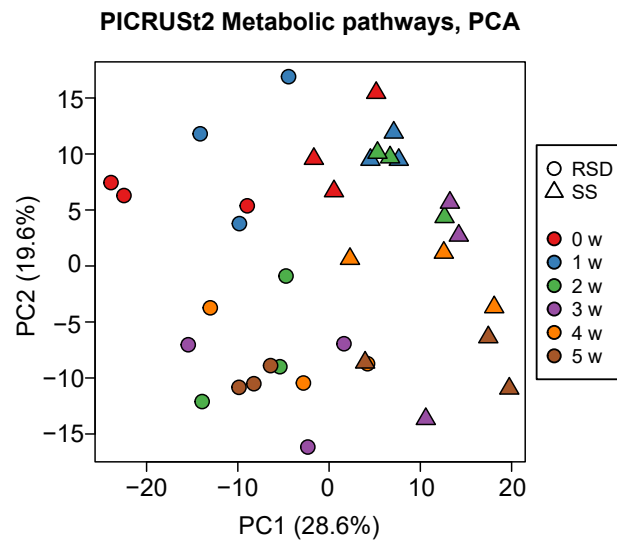

Supplemental Figure S3. Principal component analysis (PCA) of the pathway composition (eighth level in MetaCyc hierarchy) predicted by PICRUSt2 in the soil bacterial metagenomes under (○) reductive soil disinfestation (RSD) and (△) soil solarization (SS). Red, blue, green, purple, yellow, and brown denotes 0-5 w: treatment period for 0 to 5 weeks.
