# Supplementary material for: Two Distinct Soil Disinfestations Differently Modify the Bacterial Communities in a Tomato Field
Source: MDPI journal article supplement (doi:10.3390/agronomy11071375), 2021-07-07
Supplement: s1 [file s1 › Supplemental Table S1.xlsx]

## Sheet: Supplemental Table S1
Supplemental Table S1. MetaCyc_pathway_hierarchy_(version 23.5).
Level_1	Level_2	Level_3	Level_4	Level_5	Level_6	Level_7	Level_8	PATH_ID	Description
Activation/Inactivation/Interconversion	Activation	Glucosinolate Activation	aromatic glucosinolate activation	aromatic glucosinolate activation	aromatic glucosinolate activation	aromatic glucosinolate activation	aromatic glucosinolate activation	PWY-6684	aromatic glucosinolate activation
Activation/Inactivation/Interconversion	Activation	Glucosinolate Activation	glucosinolate activation	glucosinolate activation	glucosinolate activation	glucosinolate activation	glucosinolate activation	PWY-5267	glucosinolate activation
Activation/Inactivation/Interconversion	Activation	Glucosinolate Activation	indole glucosinolate activation (herbivore attack)	indole glucosinolate activation (herbivore attack)	indole glucosinolate activation (herbivore attack)	indole glucosinolate activation (herbivore attack)	indole glucosinolate activation (herbivore attack)	PWYQT-4476	indole glucosinolate activation (herbivore attack)
Activation/Inactivation/Interconversion	Activation	Glucosinolate Activation	indole glucosinolate activation (intact plant cell)	indole glucosinolate activation (intact plant cell)	indole glucosinolate activation (intact plant cell)	indole glucosinolate activation (intact plant cell)	indole glucosinolate activation (intact plant cell)	PWYQT-4477	indole glucosinolate activation (intact plant cell)
Activation/Inactivation/Interconversion	Activation	acyl carrier protein activation	acyl carrier protein activation	acyl carrier protein activation	acyl carrier protein activation	acyl carrier protein activation	acyl carrier protein activation	PWY-6012-1	acyl carrier protein activation
Activation/Inactivation/Interconversion	Activation	DIMBOA-glucoside activation	DIMBOA-glucoside activation	DIMBOA-glucoside activation	DIMBOA-glucoside activation	DIMBOA-glucoside activation	DIMBOA-glucoside activation	PWY-4441	DIMBOA-glucoside activation
Activation/Inactivation/Interconversion	Activation	ecdysteroid metabolism (arthropods)	ecdysteroid metabolism (arthropods)	ecdysteroid metabolism (arthropods)	ecdysteroid metabolism (arthropods)	ecdysteroid metabolism (arthropods)	ecdysteroid metabolism (arthropods)	PWY-7321	ecdysteroid metabolism (arthropods)
Activation/Inactivation/Interconversion	Activation	ethionamide activation	ethionamide activation	ethionamide activation	ethionamide activation	ethionamide activation	ethionamide activation	PWY-7895	ethionamide activation
Activation/Inactivation/Interconversion	Activation	indole-3-acetate activation I	indole-3-acetate activation I	indole-3-acetate activation I	indole-3-acetate activation I	indole-3-acetate activation I	indole-3-acetate activation I	PWY-1822	indole-3-acetate activation I
Activation/Inactivation/Interconversion	Activation	indole-3-acetate activation II	indole-3-acetate activation II	indole-3-acetate activation II	indole-3-acetate activation II	indole-3-acetate activation II	indole-3-acetate activation II	PWY-1921	indole-3-acetate activation II
Activation/Inactivation/Interconversion	Activation	isoniazid activation	isoniazid activation	isoniazid activation	isoniazid activation	isoniazid activation	isoniazid activation	PWY-7896	isoniazid activation
Activation/Inactivation/Interconversion	Activation	long-chain fatty acid activation	long-chain fatty acid activation	long-chain fatty acid activation	long-chain fatty acid activation	long-chain fatty acid activation	long-chain fatty acid activation	PWY-5143	long-chain fatty acid activation
Activation/Inactivation/Interconversion	Activation	sulfate activation for sulfonation	sulfate activation for sulfonation	sulfate activation for sulfonation	sulfate activation for sulfonation	sulfate activation for sulfonation	sulfate activation for sulfonation	PWY-5340	sulfate activation for sulfonation
Activation/Inactivation/Interconversion	Inactivation	Gibberellin Inactivation	gibberellin inactivation I (2β-hydroxylation)	gibberellin inactivation I (2β-hydroxylation)	gibberellin inactivation I (2β-hydroxylation)	gibberellin inactivation I (2β-hydroxylation)	gibberellin inactivation I (2β-hydroxylation)	PWY-102	gibberellin inactivation I (2β-hydroxylation)
Activation/Inactivation/Interconversion	Inactivation	Gibberellin Inactivation	gibberellin inactivation II (methylation)	gibberellin inactivation II (methylation)	gibberellin inactivation II (methylation)	gibberellin inactivation II (methylation)	gibberellin inactivation II (methylation)	PWY-6477	gibberellin inactivation II (methylation)
Activation/Inactivation/Interconversion	Inactivation	Gibberellin Inactivation	gibberellin inactivation III (epoxidation)	gibberellin inactivation III (epoxidation)	gibberellin inactivation III (epoxidation)	gibberellin inactivation III (epoxidation)	gibberellin inactivation III (epoxidation)	PWY-6494	gibberellin inactivation III (epoxidation)
Activation/Inactivation/Interconversion	Inactivation	Indole-3-acetate Inactivation	indole-3-acetate inactivation I	indole-3-acetate inactivation I	indole-3-acetate inactivation I	indole-3-acetate inactivation I	indole-3-acetate inactivation I	PWY-1961	indole-3-acetate inactivation I
Activation/Inactivation/Interconversion	Inactivation	Indole-4-acetate Inactivation	indole-3-acetate inactivation II	indole-3-acetate inactivation II	indole-3-acetate inactivation II	indole-3-acetate inactivation II	indole-3-acetate inactivation II	PWY-1962	indole-3-acetate inactivation II
Activation/Inactivation/Interconversion	Inactivation	Indole-5-acetate Inactivation	indole-3-acetate inactivation III	indole-3-acetate inactivation III	indole-3-acetate inactivation III	indole-3-acetate inactivation III	indole-3-acetate inactivation III	PWY-1981	indole-3-acetate inactivation III
Activation/Inactivation/Interconversion	Inactivation	Indole-6-acetate Inactivation	indole-3-acetate inactivation IV	indole-3-acetate inactivation IV	indole-3-acetate inactivation IV	indole-3-acetate inactivation IV	indole-3-acetate inactivation IV	PWY-2021	indole-3-acetate inactivation IV
Activation/Inactivation/Interconversion	Inactivation	Indole-7-acetate Inactivation	indole-3-acetate inactivation V	indole-3-acetate inactivation V	indole-3-acetate inactivation V	indole-3-acetate inactivation V	indole-3-acetate inactivation V	PWY-5788	indole-3-acetate inactivation V
Activation/Inactivation/Interconversion	Inactivation	Indole-8-acetate Inactivation	indole-3-acetate inactivation VI	indole-3-acetate inactivation VI	indole-3-acetate inactivation VI	indole-3-acetate inactivation VI	indole-3-acetate inactivation VI	PWY-5797	indole-3-acetate inactivation VI
Activation/Inactivation/Interconversion	Inactivation	Indole-9-acetate Inactivation	indole-3-acetate inactivation VII	indole-3-acetate inactivation VII	indole-3-acetate inactivation VII	indole-3-acetate inactivation VII	indole-3-acetate inactivation VII	PWY-5811	indole-3-acetate inactivation VII
Activation/Inactivation/Interconversion	Inactivation	Indole-10-acetate Inactivation	indole-3-acetate inactivation VIII	indole-3-acetate inactivation VIII	indole-3-acetate inactivation VIII	indole-3-acetate inactivation VIII	indole-3-acetate inactivation VIII	PWY-6219	indole-3-acetate inactivation VIII
Activation/Inactivation/Interconversion	Inactivation	Indole-11-acetate Inactivation	indole-3-acetate inactivation VIII	indole-3-acetate inactivation VIII	indole-3-acetate inactivation VIII	indole-3-acetate inactivation VIII	indole-3-acetate inactivation VIII	PWY-5784	indole-3-acetate inactivation VIII
Activation/Inactivation/Interconversion	Inactivation	Indole-12-acetate Inactivation	indole-3-acetate inactivation IX	indole-3-acetate inactivation IX	indole-3-acetate inactivation IX	indole-3-acetate inactivation IX	indole-3-acetate inactivation IX	PWY-1741	indole-3-acetate inactivation IX
Activation/Inactivation/Interconversion	Inactivation	superpathway of indole-3-acetate conjugate biosynthesis	superpathway of indole-3-acetate conjugate biosynthesis	superpathway of indole-3-acetate conjugate biosynthesis	superpathway of indole-3-acetate conjugate biosynthesis	superpathway of indole-3-acetate conjugate biosynthesis	superpathway of indole-3-acetate conjugate biosynthesis	PWY-1782	superpathway of indole-3-acetate conjugate biosynthesis
Activation/Inactivation/Interconversion	Inactivation	brassinosteroids inactivation	brassinosteroids inactivation	brassinosteroids inactivation	brassinosteroids inactivation	brassinosteroids inactivation	brassinosteroids inactivation	PWY-6546	brassinosteroids inactivation
Activation/Inactivation/Interconversion	Inactivation	ecdysteroid metabolism (arthropods)	ecdysteroid metabolism (arthropods)	ecdysteroid metabolism (arthropods)	ecdysteroid metabolism (arthropods)	ecdysteroid metabolism (arthropods)	ecdysteroid metabolism (arthropods)	PWY-7321	ecdysteroid metabolism (arthropods)
Activation/Inactivation/Interconversion	Inactivation	jasmonoyl-L-isoleucine inactivation	jasmonoyl-L-isoleucine inactivation	jasmonoyl-L-isoleucine inactivation	jasmonoyl-L-isoleucine inactivation	jasmonoyl-L-isoleucine inactivation	jasmonoyl-L-isoleucine inactivation	PWY-7859	jasmonoyl-L-isoleucine inactivation
Activation/Inactivation/Interconversion	Inactivation	tuberonate glucoside biosynthesis	tuberonate glucoside biosynthesis	tuberonate glucoside biosynthesis	tuberonate glucoside biosynthesis	tuberonate glucoside biosynthesis	tuberonate glucoside biosynthesis	PWY-6297	tuberonate glucoside biosynthesis
Activation/Inactivation/Interconversion	Interconversions	abscisic acid degradation by glucosylation	abscisic acid degradation by glucosylation	abscisic acid degradation by glucosylation	abscisic acid degradation by glucosylation	abscisic acid degradation by glucosylation	abscisic acid degradation by glucosylation	PWY-5272	abscisic acid degradation by glucosylation
Activation/Inactivation/Interconversion	Interconversions	acyl carrier protein metabolism	acyl carrier protein metabolism	acyl carrier protein metabolism	acyl carrier protein metabolism	acyl carrier protein metabolism	acyl carrier protein metabolism	PWY-6012	acyl carrier protein metabolism
Activation/Inactivation/Interconversion	Interconversions	afrormosin conjugates interconversion	afrormosin conjugates interconversion	afrormosin conjugates interconversion	afrormosin conjugates interconversion	afrormosin conjugates interconversion	afrormosin conjugates interconversion	PWY-5926	afrormosin conjugates interconversion
Activation/Inactivation/Interconversion	Interconversions	biochanin A conjugates interconversion	biochanin A conjugates interconversion	biochanin A conjugates interconversion	biochanin A conjugates interconversion	biochanin A conjugates interconversion	biochanin A conjugates interconversion	PWY-2861	biochanin A conjugates interconversion
Activation/Inactivation/Interconversion	Interconversions	cichoriin interconversion	cichoriin interconversion	cichoriin interconversion	cichoriin interconversion	cichoriin interconversion	cichoriin interconversion	PWY-7057	cichoriin interconversion
Activation/Inactivation/Interconversion	Interconversions	daidzein conjugates interconversion	daidzein conjugates interconversion	daidzein conjugates interconversion	daidzein conjugates interconversion	daidzein conjugates interconversion	daidzein conjugates interconversion	PWY-2343	daidzein conjugates interconversion
Activation/Inactivation/Interconversion	Interconversions	daphnin interconversion	daphnin interconversion	daphnin interconversion	daphnin interconversion	daphnin interconversion	daphnin interconversion	PWY-7056	daphnin interconversion
Activation/Inactivation/Interconversion	Interconversions	diadinoxanthin and diatoxanthin interconversion	diadinoxanthin and diatoxanthin interconversion	diadinoxanthin and diatoxanthin interconversion	diadinoxanthin and diatoxanthin interconversion	diadinoxanthin and diatoxanthin interconversion	diadinoxanthin and diatoxanthin interconversion	PWY-7949	diadinoxanthin and diatoxanthin interconversion
Activation/Inactivation/Interconversion	Interconversions	formononetin conjugates interconversion	formononetin conjugates interconversion	formononetin conjugates interconversion	formononetin conjugates interconversion	formononetin conjugates interconversion	formononetin conjugates interconversion	PWY-2904	formononetin conjugates interconversion
Activation/Inactivation/Interconversion	Interconversions	genistein conjugates interconversion	genistein conjugates interconversion	genistein conjugates interconversion	genistein conjugates interconversion	genistein conjugates interconversion	genistein conjugates interconversion	PWY-2345	genistein conjugates interconversion
Activation/Inactivation/Interconversion	Interconversions	geranyl acetate biosynthesis	geranyl acetate biosynthesis	geranyl acetate biosynthesis	geranyl acetate biosynthesis	geranyl acetate biosynthesis	geranyl acetate biosynthesis	PWY-5835	geranyl acetate biosynthesis
Activation/Inactivation/Interconversion	Interconversions	homocysteine and cysteine interconversion	homocysteine and cysteine interconversion	homocysteine and cysteine interconversion	homocysteine and cysteine interconversion	homocysteine and cysteine interconversion	homocysteine and cysteine interconversion	PWY-801	homocysteine and cysteine interconversion
Activation/Inactivation/Interconversion	Interconversions	maackiain conjugates interconversion	maackiain conjugates interconversion	maackiain conjugates interconversion	maackiain conjugates interconversion	maackiain conjugates interconversion	maackiain conjugates interconversion	PWY-2701	maackiain conjugates interconversion
Activation/Inactivation/Interconversion	Interconversions	medicarpin conjugates interconversion	medicarpin conjugates interconversion	medicarpin conjugates interconversion	medicarpin conjugates interconversion	medicarpin conjugates interconversion	medicarpin conjugates interconversion	PWY-2561	medicarpin conjugates interconversion
Activation/Inactivation/Interconversion	Interconversions	methyl indole-3-acetate interconversion	methyl indole-3-acetate interconversion	methyl indole-3-acetate interconversion	methyl indole-3-acetate interconversion	methyl indole-3-acetate interconversion	methyl indole-3-acetate interconversion	PWY-6303	methyl indole-3-acetate interconversion
Activation/Inactivation/Interconversion	Interconversions	oleandomycin activation/inactivation	oleandomycin activation/inactivation	oleandomycin activation/inactivation	oleandomycin activation/inactivation	oleandomycin activation/inactivation	oleandomycin activation/inactivation	PWY-6972	oleandomycin activation/inactivation
Activation/Inactivation/Interconversion	Interconversions	phenylethyl acetate biosynthesis	phenylethyl acetate biosynthesis	phenylethyl acetate biosynthesis	phenylethyl acetate biosynthesis	phenylethyl acetate biosynthesis	phenylethyl acetate biosynthesis	PWY-7075	phenylethyl acetate biosynthesis
Activation/Inactivation/Interconversion	Interconversions	UDP-sugars interconversion	UDP-sugars interconversion	UDP-sugars interconversion	UDP-sugars interconversion	UDP-sugars interconversion	UDP-sugars interconversion	PWY-5114	UDP-sugars interconversion
Activation/Inactivation/Interconversion	Interconversions	violaxanthin, antheraxanthin and zeaxanthin interconversion	violaxanthin, antheraxanthin and zeaxanthin interconversion	violaxanthin, antheraxanthin and zeaxanthin interconversion	violaxanthin, antheraxanthin and zeaxanthin interconversion	violaxanthin, antheraxanthin and zeaxanthin interconversion	violaxanthin, antheraxanthin and zeaxanthin interconversion	PWY-5945	violaxanthin, antheraxanthin and zeaxanthin interconversion
Bioluminescence	bacterial bioluminescence	bacterial bioluminescence	bacterial bioluminescence	bacterial bioluminescence	bacterial bioluminescence	bacterial bioluminescence	bacterial bioluminescence	PWY-7723	bacterial bioluminescence
Bioluminescence	coral bioluminescence	coral bioluminescence	coral bioluminescence	coral bioluminescence	coral bioluminescence	coral bioluminescence	coral bioluminescence	PWY-7914	coral bioluminescence
Bioluminescence	dinoflagellate bioluminescence	dinoflagellate bioluminescence	dinoflagellate bioluminescence	dinoflagellate bioluminescence	dinoflagellate bioluminescence	dinoflagellate bioluminescence	dinoflagellate bioluminescence	PWY-7912	dinoflagellate bioluminescence
Bioluminescence	firefly bioluminescence	firefly bioluminescence	firefly bioluminescence	firefly bioluminescence	firefly bioluminescence	firefly bioluminescence	firefly bioluminescence	PWY-7913	firefly bioluminescence
Bioluminescence	fungal bioluminescence	fungal bioluminescence	fungal bioluminescence	fungal bioluminescence	fungal bioluminescence	fungal bioluminescence	fungal bioluminescence	PWY-7937	fungal bioluminescence
Bioluminescence	jellyfish bioluminescence	jellyfish bioluminescence	jellyfish bioluminescence	jellyfish bioluminescence	jellyfish bioluminescence	jellyfish bioluminescence	jellyfish bioluminescence	PWY-7915	jellyfish bioluminescence
Bioluminescence	squid bioluminescence	squid bioluminescence	squid bioluminescence	squid bioluminescence	squid bioluminescence	squid bioluminescence	squid bioluminescence	PWY-7916	squid bioluminescence
Biosynthesis	Amine and Polyamine Biosynthesis	Betaine Biosynthesis	β-alanine betaine biosynthesis	β-alanine betaine biosynthesis	β-alanine betaine biosynthesis	β-alanine betaine biosynthesis	β-alanine betaine biosynthesis	PWY-4021	β-alanine betaine biosynthesis
Biosynthesis	Amine and Polyamine Biosynthesis	Betaine Biosynthesis	glycine betaine biosynthesis I (Gram-negative bacteria)	glycine betaine biosynthesis I (Gram-negative bacteria)	glycine betaine biosynthesis I (Gram-negative bacteria)	glycine betaine biosynthesis I (Gram-negative bacteria)	glycine betaine biosynthesis I (Gram-negative bacteria)	BETSYN-PWY	glycine betaine biosynthesis I (Gram-negative bacteria)
Biosynthesis	Amine and Polyamine Biosynthesis	Betaine Biosynthesis	glycine betaine biosynthesis II (Gram-positive bacteria)	glycine betaine biosynthesis II (Gram-positive bacteria)	glycine betaine biosynthesis II (Gram-positive bacteria)	glycine betaine biosynthesis II (Gram-positive bacteria)	glycine betaine biosynthesis II (Gram-positive bacteria)	PWY-3722	glycine betaine biosynthesis II (Gram-positive bacteria)
Biosynthesis	Amine and Polyamine Biosynthesis	Betaine Biosynthesis	glycine betaine biosynthesis III (plants)	glycine betaine biosynthesis III (plants)	glycine betaine biosynthesis III (plants)	glycine betaine biosynthesis III (plants)	glycine betaine biosynthesis III (plants)	PWY1F-353	glycine betaine biosynthesis III (plants)
Biosynthesis	Amine and Polyamine Biosynthesis	Betaine Biosynthesis	glycine betaine biosynthesis IV (from glycine)	glycine betaine biosynthesis IV (from glycine)	glycine betaine biosynthesis IV (from glycine)	glycine betaine biosynthesis IV (from glycine)	glycine betaine biosynthesis IV (from glycine)	P541-PWY	glycine betaine biosynthesis IV (from glycine)
Biosynthesis	Amine and Polyamine Biosynthesis	Betaine Biosynthesis	glycine betaine biosynthesis V (from glycine)	glycine betaine biosynthesis V (from glycine)	glycine betaine biosynthesis V (from glycine)	glycine betaine biosynthesis V (from glycine)	glycine betaine biosynthesis V (from glycine)	PWY-6004	glycine betaine biosynthesis V (from glycine)
Biosynthesis	Amine and Polyamine Biosynthesis	Choline Biosynthesis	choline biosynthesis I	choline biosynthesis I	choline biosynthesis I	choline biosynthesis I	choline biosynthesis I	PWY-3385	choline biosynthesis I
Biosynthesis	Amine and Polyamine Biosynthesis	Choline Biosynthesis	choline biosynthesis II	choline biosynthesis II	choline biosynthesis II	choline biosynthesis II	choline biosynthesis II	PWY-3542	choline biosynthesis II
Biosynthesis	Amine and Polyamine Biosynthesis	Choline Biosynthesis	choline biosynthesis III	choline biosynthesis III	choline biosynthesis III	choline biosynthesis III	choline biosynthesis III	PWY-3561	choline biosynthesis III
Biosynthesis	Amine and Polyamine Biosynthesis	Putrescine Biosynthesis	putrescine biosynthesis I	putrescine biosynthesis I	putrescine biosynthesis I	putrescine biosynthesis I	putrescine biosynthesis I	PWY-40	putrescine biosynthesis I
Biosynthesis	Amine and Polyamine Biosynthesis	Putrescine Biosynthesis	putrescine biosynthesis II	putrescine biosynthesis II	putrescine biosynthesis II	putrescine biosynthesis II	putrescine biosynthesis II	PWY-43	putrescine biosynthesis II
Biosynthesis	Amine and Polyamine Biosynthesis	Putrescine Biosynthesis	putrescine biosynthesis III	putrescine biosynthesis III	putrescine biosynthesis III	putrescine biosynthesis III	putrescine biosynthesis III	PWY-46	putrescine biosynthesis III
Biosynthesis	Amine and Polyamine Biosynthesis	Putrescine Biosynthesis	superpathway of putrescine biosynthesis	superpathway of putrescine biosynthesis	superpathway of putrescine biosynthesis	superpathway of putrescine biosynthesis	superpathway of putrescine biosynthesis	PWY-6305	superpathway of putrescine biosynthesis
Biosynthesis	Amine and Polyamine Biosynthesis	Spermidine Biosynthesis	spermidine biosynthesis I	spermidine biosynthesis I	spermidine biosynthesis I	spermidine biosynthesis I	spermidine biosynthesis I	BSUBPOLYAMSYN-PWY	spermidine biosynthesis I
Biosynthesis	Amine and Polyamine Biosynthesis	Spermidine Biosynthesis	spermidine biosynthesis II	spermidine biosynthesis II	spermidine biosynthesis II	spermidine biosynthesis II	spermidine biosynthesis II	PWY-6559	spermidine biosynthesis II
Biosynthesis	Amine and Polyamine Biosynthesis	Spermidine Biosynthesis	spermidine biosynthesis III	spermidine biosynthesis III	spermidine biosynthesis III	spermidine biosynthesis III	spermidine biosynthesis III	PWY-6834	spermidine biosynthesis III
Biosynthesis	Amine and Polyamine Biosynthesis	aminopropylcadaverine biosynthesis	aminopropylcadaverine biosynthesis	aminopropylcadaverine biosynthesis	aminopropylcadaverine biosynthesis	aminopropylcadaverine biosynthesis	aminopropylcadaverine biosynthesis	PWY0-1303	aminopropylcadaverine biosynthesis
Biosynthesis	Amine and Polyamine Biosynthesis	cadaverine biosynthesis	cadaverine biosynthesis	cadaverine biosynthesis	cadaverine biosynthesis	cadaverine biosynthesis	cadaverine biosynthesis	PWY0-1601	cadaverine biosynthesis
Biosynthesis	Amine and Polyamine Biosynthesis	creatine biosynthesis	creatine biosynthesis	creatine biosynthesis	creatine biosynthesis	creatine biosynthesis	creatine biosynthesis	GLYCGREAT-PWY	creatine biosynthesis
Biosynthesis	Amine and Polyamine Biosynthesis	creatine-phosphate biosynthesis	creatine-phosphate biosynthesis	creatine-phosphate biosynthesis	creatine-phosphate biosynthesis	creatine-phosphate biosynthesis	creatine-phosphate biosynthesis	PWY-6158	creatine-phosphate biosynthesis
Biosynthesis	Amine and Polyamine Biosynthesis	ectoine biosynthesis	ectoine biosynthesis	ectoine biosynthesis	ectoine biosynthesis	ectoine biosynthesis	ectoine biosynthesis	P101-PWY	ectoine biosynthesis
Biosynthesis	Amine and Polyamine Biosynthesis	glutathionylspermidine biosynthesis	glutathionylspermidine biosynthesis	glutathionylspermidine biosynthesis	glutathionylspermidine biosynthesis	glutathionylspermidine biosynthesis	glutathionylspermidine biosynthesis	PWY-4121	glutathionylspermidine biosynthesis
Biosynthesis	Amine and Polyamine Biosynthesis	histamine biosynthesis	histamine biosynthesis	histamine biosynthesis	histamine biosynthesis	histamine biosynthesis	histamine biosynthesis	PWY-6173	histamine biosynthesis
Biosynthesis	Amine and Polyamine Biosynthesis	homospermidine biosynthesis	homospermidine biosynthesis	homospermidine biosynthesis	homospermidine biosynthesis	homospermidine biosynthesis	homospermidine biosynthesis	PWY-5907	homospermidine biosynthesis
Biosynthesis	Amine and Polyamine Biosynthesis	norspermidine biosynthesis	norspermidine biosynthesis	norspermidine biosynthesis	norspermidine biosynthesis	norspermidine biosynthesis	norspermidine biosynthesis	PWY-6562	norspermidine biosynthesis
Biosynthesis	Amine and Polyamine Biosynthesis	octopamine biosynthesis	octopamine biosynthesis	octopamine biosynthesis	octopamine biosynthesis	octopamine biosynthesis	octopamine biosynthesis	PWY-7297	octopamine biosynthesis
Biosynthesis	Amine and Polyamine Biosynthesis	serinol biosynthesis	serinol biosynthesis	serinol biosynthesis	serinol biosynthesis	serinol biosynthesis	serinol biosynthesis	PWY-6456	serinol biosynthesis
Biosynthesis	Amine and Polyamine Biosynthesis	spermine biosynthesis	spermine biosynthesis	spermine biosynthesis	spermine biosynthesis	spermine biosynthesis	spermine biosynthesis	ARGSPECAT-PWY	spermine biosynthesis
Biosynthesis	Amine and Polyamine Biosynthesis	superpathway of arginine and polyamine biosynthesis	superpathway of arginine and polyamine biosynthesis	superpathway of arginine and polyamine biosynthesis	superpathway of arginine and polyamine biosynthesis	superpathway of arginine and polyamine biosynthesis	superpathway of arginine and polyamine biosynthesis	ARG+POLYAMINE-SYN	superpathway of arginine and polyamine biosynthesis
Biosynthesis	Amine and Polyamine Biosynthesis	superpathway of polyamine biosynthesis I	superpathway of polyamine biosynthesis I	superpathway of polyamine biosynthesis I	superpathway of polyamine biosynthesis I	superpathway of polyamine biosynthesis I	superpathway of polyamine biosynthesis I	POLYAMSYN-PWY	superpathway of polyamine biosynthesis I
Biosynthesis	Amine and Polyamine Biosynthesis	superpathway of polyamine biosynthesis II	superpathway of polyamine biosynthesis II	superpathway of polyamine biosynthesis II	superpathway of polyamine biosynthesis II	superpathway of polyamine biosynthesis II	superpathway of polyamine biosynthesis II	POLYAMINSYN3-PWY	superpathway of polyamine biosynthesis II
Biosynthesis	Amine and Polyamine Biosynthesis	superpathway of polyamine biosynthesis III	superpathway of polyamine biosynthesis III	superpathway of polyamine biosynthesis III	superpathway of polyamine biosynthesis III	superpathway of polyamine biosynthesis III	superpathway of polyamine biosynthesis III	PWY-6565	superpathway of polyamine biosynthesis III
Biosynthesis	Amine and Polyamine Biosynthesis	trypanothione biosynthesis	trypanothione biosynthesis	trypanothione biosynthesis	trypanothione biosynthesis	trypanothione biosynthesis	trypanothione biosynthesis	TRYPANOSYN-PWY	trypanothione biosynthesis
Biosynthesis	Amine and Polyamine Biosynthesis	ureide biosynthesis	ureide biosynthesis	ureide biosynthesis	ureide biosynthesis	ureide biosynthesis	ureide biosynthesis	URSIN-PWY	ureide biosynthesis
Biosynthesis	Amino Acid Biosynthesis	Modification of Amino Acid Within Proteins	diphthamide biosynthesis I (archaea)	diphthamide biosynthesis I (archaea)	diphthamide biosynthesis I (archaea)	diphthamide biosynthesis I (archaea)	diphthamide biosynthesis I (archaea)	PWY-6482	diphthamide biosynthesis I (archaea)
Biosynthesis	Amino Acid Biosynthesis	Modification of Amino Acid Within Proteins	diphthamide biosynthesis II (eukaryotes)	diphthamide biosynthesis II (eukaryotes)	diphthamide biosynthesis II (eukaryotes)	diphthamide biosynthesis II (eukaryotes)	diphthamide biosynthesis II (eukaryotes)	PWY-7546	diphthamide biosynthesis II (eukaryotes)
Biosynthesis	Amino Acid Biosynthesis	Modification of Amino Acid Within Proteins	hypusine biosynthesis	hypusine biosynthesis	hypusine biosynthesis	hypusine biosynthesis	hypusine biosynthesis	PWY-5905	hypusine biosynthesis
Biosynthesis	Amino Acid Biosynthesis	Modification of Amino Acid Within Proteins	protein citrullination	protein citrullination	protein citrullination	protein citrullination	protein citrullination	PWY-4921	protein citrullination
Biosynthesis	Amino Acid Biosynthesis	Other Amino Acid Biosynthesis	β Alanine Biosynthesis	β-alanine biosynthesis I	β-alanine biosynthesis I	β-alanine biosynthesis I	β-alanine biosynthesis I	PWY-3981	β-alanine biosynthesis I
Biosynthesis	Amino Acid Biosynthesis	Other Amino Acid Biosynthesis	β Alanine Biosynthesis	β-alanine biosynthesis II	β-alanine biosynthesis II	β-alanine biosynthesis II	β-alanine biosynthesis II	PWY-3941	β-alanine biosynthesis II
Biosynthesis	Amino Acid Biosynthesis	Other Amino Acid Biosynthesis	β Alanine Biosynthesis	β-alanine biosynthesis III	β-alanine biosynthesis III	β-alanine biosynthesis III	β-alanine biosynthesis III	PWY-5155	β-alanine biosynthesis III
Biosynthesis	Amino Acid Biosynthesis	Other Amino Acid Biosynthesis	β Alanine Biosynthesis	β-alanine biosynthesis IV	β-alanine biosynthesis IV	β-alanine biosynthesis IV	β-alanine biosynthesis IV	PWY-5760	β-alanine biosynthesis IV
Biosynthesis	Amino Acid Biosynthesis	Other Amino Acid Biosynthesis	β Alanine Biosynthesis	uracil degradation I (reductive)	uracil degradation I (reductive)	uracil degradation I (reductive)	uracil degradation I (reductive)	PWY-3982	uracil degradation I (reductive)
Biosynthesis	Amino Acid Biosynthesis	Other Amino Acid Biosynthesis	L-citrulline Biosynthesis	L-citrulline biosynthesis	L-citrulline biosynthesis	L-citrulline biosynthesis	L-citrulline biosynthesis	CITRULBIO-PWY	L-citrulline biosynthesis
Biosynthesis	Amino Acid Biosynthesis	Other Amino Acid Biosynthesis	L-citrulline Biosynthesis	protein citrullination	protein citrullination	protein citrullination	protein citrullination	PWY-4921	protein citrullination
Biosynthesis	Amino Acid Biosynthesis	Other Amino Acid Biosynthesis	L-citrulline Biosynthesis	superpathway of L-citrulline metabolism	superpathway of L-citrulline metabolism	superpathway of L-citrulline metabolism	superpathway of L-citrulline metabolism	PWY-5004	superpathway of L-citrulline metabolism
Biosynthesis	Amino Acid Biosynthesis	Other Amino Acid Biosynthesis	L-Ornithine Biosynthesis	L-Nδ-acetylornithine biosynthesis	L-Nδ-acetylornithine biosynthesis	L-Nδ-acetylornithine biosynthesis	L-Nδ-acetylornithine biosynthesis	PWY-6922	L-Nδ-acetylornithine biosynthesis
Biosynthesis	Amino Acid Biosynthesis	Other Amino Acid Biosynthesis	L-Ornithine Biosynthesis	L-ornithine biosynthesis I	L-ornithine biosynthesis I	L-ornithine biosynthesis I	L-ornithine biosynthesis I	GLUTORN-PWY	L-ornithine biosynthesis I
Biosynthesis	Amino Acid Biosynthesis	Other Amino Acid Biosynthesis	L-Ornithine Biosynthesis	L-ornithine biosynthesis II	L-ornithine biosynthesis II	L-ornithine biosynthesis II	L-ornithine biosynthesis II	ARGININE-SYN4-PWY	L-ornithine biosynthesis II
Biosynthesis	Amino Acid Biosynthesis	Other Amino Acid Biosynthesis	3-hydroxy-L-homotyrosine biosynthesis	3-hydroxy-L-homotyrosine biosynthesis	3-hydroxy-L-homotyrosine biosynthesis	3-hydroxy-L-homotyrosine biosynthesis	3-hydroxy-L-homotyrosine biosynthesis	PWY-7649	3-hydroxy-L-homotyrosine biosynthesis
Biosynthesis	Amino Acid Biosynthesis	Other Amino Acid Biosynthesis	4-hydroxy-4-methyl-L-glutamate biosynthesis	4-hydroxy-4-methyl-L-glutamate biosynthesis	4-hydroxy-4-methyl-L-glutamate biosynthesis	4-hydroxy-4-methyl-L-glutamate biosynthesis	4-hydroxy-4-methyl-L-glutamate biosynthesis	PWY-7701	4-hydroxy-4-methyl-L-glutamate biosynthesis
Biosynthesis	Amino Acid Biosynthesis	Other Amino Acid Biosynthesis	4-methyl-proline biosynthesis	4-methyl-proline biosynthesis	4-methyl-proline biosynthesis	4-methyl-proline biosynthesis	4-methyl-proline biosynthesis	PWY-7648	4-methyl-proline biosynthesis
Biosynthesis	Amino Acid Biosynthesis	Other Amino Acid Biosynthesis	alanine racemization	alanine racemization	alanine racemization	alanine racemization	alanine racemization	PWY-8072	alanine racemization
Biosynthesis	Amino Acid Biosynthesis	Other Amino Acid Biosynthesis	D-cycloserine biosynthesis	D-cycloserine biosynthesis	D-cycloserine biosynthesis	D-cycloserine biosynthesis	D-cycloserine biosynthesis	PWY-7274	D-cycloserine biosynthesis
Biosynthesis	Amino Acid Biosynthesis	Other Amino Acid Biosynthesis	D-serine metabolism	D-serine metabolism	D-serine metabolism	D-serine metabolism	D-serine metabolism	PWY-6196	D-serine metabolism
Biosynthesis	Amino Acid Biosynthesis	Other Amino Acid Biosynthesis	L-homocysteine biosynthesis	L-homocysteine biosynthesis	L-homocysteine biosynthesis	L-homocysteine biosynthesis	L-homocysteine biosynthesis	PWY-5344	L-homocysteine biosynthesis
Biosynthesis	Amino Acid Biosynthesis	Other Amino Acid Biosynthesis	L-homomethionine biosynthesis	L-homomethionine biosynthesis	L-homomethionine biosynthesis	L-homomethionine biosynthesis	L-homomethionine biosynthesis	PWY-1186	L-homomethionine biosynthesis
Biosynthesis	Amino Acid Biosynthesis	Other Amino Acid Biosynthesis	L-homophenylalanine biosynthesis	L-homophenylalanine biosynthesis	L-homophenylalanine biosynthesis	L-homophenylalanine biosynthesis	L-homophenylalanine biosynthesis	PWY-7275	L-homophenylalanine biosynthesis
Biosynthesis	Amino Acid Biosynthesis	Other Amino Acid Biosynthesis	L-homoserine biosynthesis	L-homoserine biosynthesis	L-homoserine biosynthesis	L-homoserine biosynthesis	L-homoserine biosynthesis	HOMOSERSYN-PWY	L-homoserine biosynthesis
Biosynthesis	Amino Acid Biosynthesis	Other Amino Acid Biosynthesis	seleno-amino acid biosynthesis (plants)	seleno-amino acid biosynthesis (plants)	seleno-amino acid biosynthesis (plants)	seleno-amino acid biosynthesis (plants)	seleno-amino acid biosynthesis (plants)	PWY-6936	seleno-amino acid biosynthesis (plants)
Biosynthesis	Amino Acid Biosynthesis	Other Amino Acid Biosynthesis	superpathway of seleno-compound metabolism	superpathway of seleno-compound metabolism	superpathway of seleno-compound metabolism	superpathway of seleno-compound metabolism	superpathway of seleno-compound metabolism	PWY-6395	superpathway of seleno-compound metabolism
Biosynthesis	Amino Acid Biosynthesis	Proteinogenic Amino Acid Biosynthesis	Glycine Biosynthesis	glycine biosynthesis I	glycine biosynthesis I	glycine biosynthesis I	glycine biosynthesis I	GLYSYN-PWY	glycine biosynthesis I
Biosynthesis	Amino Acid Biosynthesis	Proteinogenic Amino Acid Biosynthesis	Glycine Biosynthesis	glycine biosynthesis II	glycine biosynthesis II	glycine biosynthesis II	glycine biosynthesis II	GLYCINE-SYN2-PWY	glycine biosynthesis II
Biosynthesis	Amino Acid Biosynthesis	Proteinogenic Amino Acid Biosynthesis	Glycine Biosynthesis	glycine biosynthesis III	glycine biosynthesis III	glycine biosynthesis III	glycine biosynthesis III	GLYSYN-ALA-PWY	glycine biosynthesis III
Biosynthesis	Amino Acid Biosynthesis	Proteinogenic Amino Acid Biosynthesis	Glycine Biosynthesis	glycine biosynthesis IV	glycine biosynthesis IV	glycine biosynthesis IV	glycine biosynthesis IV	GLYSYN-THR-PWY	glycine biosynthesis IV
Biosynthesis	Amino Acid Biosynthesis	Proteinogenic Amino Acid Biosynthesis	L-alanine Biosynthesis	L-alanine biosynthesis I	L-alanine biosynthesis I	L-alanine biosynthesis I	L-alanine biosynthesis I	ALANINE-VALINESYN-PWY	L-alanine biosynthesis I
Biosynthesis	Amino Acid Biosynthesis	Proteinogenic Amino Acid Biosynthesis	L-alanine Biosynthesis	L-alanine biosynthesis II	L-alanine biosynthesis II	L-alanine biosynthesis II	L-alanine biosynthesis II	ALANINE-SYN2-PWY	L-alanine biosynthesis II
Biosynthesis	Amino Acid Biosynthesis	Proteinogenic Amino Acid Biosynthesis	L-alanine Biosynthesis	L-alanine biosynthesis III	L-alanine biosynthesis III	L-alanine biosynthesis III	L-alanine biosynthesis III	PWY0-1021	L-alanine biosynthesis III
Biosynthesis	Amino Acid Biosynthesis	Proteinogenic Amino Acid Biosynthesis	L-alanine Biosynthesis	superpathway of L-alanine biosynthesis	superpathway of L-alanine biosynthesis	superpathway of L-alanine biosynthesis	superpathway of L-alanine biosynthesis	PWY0-1061	superpathway of L-alanine biosynthesis
Biosynthesis	Amino Acid Biosynthesis	Proteinogenic Amino Acid Biosynthesis	L-arginine Biosynthesis	L-arginine biosynthesis I (via L-ornithine)	L-arginine biosynthesis I (via L-ornithine)	L-arginine biosynthesis I (via L-ornithine)	L-arginine biosynthesis I (via L-ornithine)	ARGSYN-PWY	L-arginine biosynthesis I (via L-ornithine)
Biosynthesis	Amino Acid Biosynthesis	Proteinogenic Amino Acid Biosynthesis	L-arginine Biosynthesis	L-arginine biosynthesis II (acetyl cycle)	L-arginine biosynthesis II (acetyl cycle)	L-arginine biosynthesis II (acetyl cycle)	L-arginine biosynthesis II (acetyl cycle)	ARGSYNBSUB-PWY	L-arginine biosynthesis II (acetyl cycle)
Biosynthesis	Amino Acid Biosynthesis	Proteinogenic Amino Acid Biosynthesis	L-arginine Biosynthesis	L-arginine biosynthesis III (via N-acetyl-L-citrulline)	L-arginine biosynthesis III (via N-acetyl-L-citrulline)	L-arginine biosynthesis III (via N-acetyl-L-citrulline)	L-arginine biosynthesis III (via N-acetyl-L-citrulline)	PWY-5154	L-arginine biosynthesis III (via N-acetyl-L-citrulline)
Biosynthesis	Amino Acid Biosynthesis	Proteinogenic Amino Acid Biosynthesis	L-arginine Biosynthesis	L-arginine biosynthesis IV (archaebacteria)	L-arginine biosynthesis IV (archaebacteria)	L-arginine biosynthesis IV (archaebacteria)	L-arginine biosynthesis IV (archaebacteria)	PWY-7400	L-arginine biosynthesis IV (archaebacteria)
Biosynthesis	Amino Acid Biosynthesis	Proteinogenic Amino Acid Biosynthesis	L-arginine Biosynthesis	nitric oxide biosynthesis II (mammals)	nitric oxide biosynthesis II (mammals)	nitric oxide biosynthesis II (mammals)	nitric oxide biosynthesis II (mammals)	PWY-4983	nitric oxide biosynthesis II (mammals)
Biosynthesis	Amino Acid Biosynthesis	Proteinogenic Amino Acid Biosynthesis	L-asparagine Biosynthesis	cyanide detoxification I	cyanide detoxification I	cyanide detoxification I	cyanide detoxification I	ASPSYNII-PWY	cyanide detoxification I
Biosynthesis	Amino Acid Biosynthesis	Proteinogenic Amino Acid Biosynthesis	L-asparagine Biosynthesis	L-asparagine biosynthesis I	L-asparagine biosynthesis I	L-asparagine biosynthesis I	L-asparagine biosynthesis I	ASPARAGINE-BIOSYNTHESIS	L-asparagine biosynthesis I
Biosynthesis	Amino Acid Biosynthesis	Proteinogenic Amino Acid Biosynthesis	L-asparagine Biosynthesis	L-asparagine biosynthesis II	L-asparagine biosynthesis II	L-asparagine biosynthesis II	L-asparagine biosynthesis II	ASPARAGINESYN-PWY	L-asparagine biosynthesis II
Biosynthesis	Amino Acid Biosynthesis	Proteinogenic Amino Acid Biosynthesis	L-asparagine Biosynthesis	L-asparagine biosynthesis III (tRNA-dependent)	L-asparagine biosynthesis III (tRNA-dependent)	L-asparagine biosynthesis III (tRNA-dependent)	L-asparagine biosynthesis III (tRNA-dependent)	PWY490-4	L-asparagine biosynthesis III (tRNA-dependent)
Biosynthesis	Amino Acid Biosynthesis	Proteinogenic Amino Acid Biosynthesis	L-asparagine Biosynthesis	superpathway of L-asparagine biosynthesis	superpathway of L-asparagine biosynthesis	superpathway of L-asparagine biosynthesis	superpathway of L-asparagine biosynthesis	PWY0-1325	superpathway of L-asparagine biosynthesis
Biosynthesis	Amino Acid Biosynthesis	Proteinogenic Amino Acid Biosynthesis	L-aspartate Biosynthesis	L-aspartate biosynthesis	L-aspartate biosynthesis	L-aspartate biosynthesis	L-aspartate biosynthesis	ASPARTATESYN-PWY	L-aspartate biosynthesis
Biosynthesis	Amino Acid Biosynthesis	Proteinogenic Amino Acid Biosynthesis	L-cysteine Biosynthesis	homocysteine and cysteine interconversion	homocysteine and cysteine interconversion	homocysteine and cysteine interconversion	homocysteine and cysteine interconversion	PWY-801	homocysteine and cysteine interconversion
Biosynthesis	Amino Acid Biosynthesis	Proteinogenic Amino Acid Biosynthesis	L-cysteine Biosynthesis	L-cysteine biosynthesis I	L-cysteine biosynthesis I	L-cysteine biosynthesis I	L-cysteine biosynthesis I	CYSTSYN-PWY	L-cysteine biosynthesis I
Biosynthesis	Amino Acid Biosynthesis	Proteinogenic Amino Acid Biosynthesis	L-cysteine Biosynthesis	L-cysteine biosynthesis II (tRNA-dependent)	L-cysteine biosynthesis II (tRNA-dependent)	L-cysteine biosynthesis II (tRNA-dependent)	L-cysteine biosynthesis II (tRNA-dependent)	PWY-6308	L-cysteine biosynthesis II (tRNA-dependent)
Biosynthesis	Amino Acid Biosynthesis	Proteinogenic Amino Acid Biosynthesis	L-cysteine Biosynthesis	L-cysteine biosynthesis III (from L-homocysteine)	L-cysteine biosynthesis III (from L-homocysteine)	L-cysteine biosynthesis III (from L-homocysteine)	L-cysteine biosynthesis III (from L-homocysteine)	HOMOCYSDEGR-PWY	L-cysteine biosynthesis III (from L-homocysteine)
Biosynthesis	Amino Acid Biosynthesis	Proteinogenic Amino Acid Biosynthesis	L-cysteine Biosynthesis	L-cysteine biosynthesis V (mycobacteria)	L-cysteine biosynthesis V (mycobacteria)	L-cysteine biosynthesis V (mycobacteria)	L-cysteine biosynthesis V (mycobacteria)	PWY-7289	L-cysteine biosynthesis V (mycobacteria)
Biosynthesis	Amino Acid Biosynthesis	Proteinogenic Amino Acid Biosynthesis	L-cysteine Biosynthesis	L-cysteine biosynthesis VI (from L-methionine)	L-cysteine biosynthesis VI (from L-methionine)	L-cysteine biosynthesis VI (from L-methionine)	L-cysteine biosynthesis VI (from L-methionine)	PWY-I9	L-cysteine biosynthesis VI (from L-methionine)
Biosynthesis	Amino Acid Biosynthesis	Proteinogenic Amino Acid Biosynthesis	L-cysteine Biosynthesis	L-cysteine biosynthesis VII (from S-sulfo-L-cysteine)	L-cysteine biosynthesis VII (from S-sulfo-L-cysteine)	L-cysteine biosynthesis VII (from S-sulfo-L-cysteine)	L-cysteine biosynthesis VII (from S-sulfo-L-cysteine)	PWY-7870	L-cysteine biosynthesis VII (from S-sulfo-L-cysteine)
Biosynthesis	Amino Acid Biosynthesis	Proteinogenic Amino Acid Biosynthesis	L-cysteine Biosynthesis	L-cysteine biosynthesis VIII (Thermococcus kodakarensis)	L-cysteine biosynthesis VIII (Thermococcus kodakarensis)	L-cysteine biosynthesis VIII (Thermococcus kodakarensis)	L-cysteine biosynthesis VIII (Thermococcus kodakarensis)	PWY-8009	L-cysteine biosynthesis VIII (Thermococcus kodakarensis)
Biosynthesis	Amino Acid Biosynthesis	Proteinogenic Amino Acid Biosynthesis	L-cysteine Biosynthesis	L-cysteine biosynthesis IX (Trichomonas vaginalis)	L-cysteine biosynthesis IX (Trichomonas vaginalis)	L-cysteine biosynthesis IX (Trichomonas vaginalis)	L-cysteine biosynthesis IX (Trichomonas vaginalis)	PWY-8010	L-cysteine biosynthesis IX (Trichomonas vaginalis)
Biosynthesis	Amino Acid Biosynthesis	Proteinogenic Amino Acid Biosynthesis	L-cysteine Biosynthesis	superpathway of L-cysteine biosynthesis (fungi)	superpathway of L-cysteine biosynthesis (fungi)	superpathway of L-cysteine biosynthesis (fungi)	superpathway of L-cysteine biosynthesis (fungi)	PWY-6293	superpathway of L-cysteine biosynthesis (fungi)
Biosynthesis	Amino Acid Biosynthesis	Proteinogenic Amino Acid Biosynthesis	L-cysteine Biosynthesis	superpathway of L-cysteine biosynthesis (mammalian)	superpathway of L-cysteine biosynthesis (mammalian)	superpathway of L-cysteine biosynthesis (mammalian)	superpathway of L-cysteine biosynthesis (mammalian)	PWY-6292	superpathway of L-cysteine biosynthesis (mammalian)
Biosynthesis	Amino Acid Biosynthesis	Proteinogenic Amino Acid Biosynthesis	L-glutamate Biosynthesis	L-arginine degradation I (arginase pathway)	L-arginine degradation I (arginase pathway)	L-arginine degradation I (arginase pathway)	L-arginine degradation I (arginase pathway)	ARGASEDEG-PWY	L-arginine degradation I (arginase pathway)
Biosynthesis	Amino Acid Biosynthesis	Proteinogenic Amino Acid Biosynthesis	L-glutamate Biosynthesis	L-glutamate and L-glutamine biosynthesis	L-glutamate and L-glutamine biosynthesis	L-glutamate and L-glutamine biosynthesis	L-glutamate and L-glutamine biosynthesis	PWY-5505	L-glutamate and L-glutamine biosynthesis
Biosynthesis	Amino Acid Biosynthesis	Proteinogenic Amino Acid Biosynthesis	L-glutamate Biosynthesis	L-glutamate biosynthesis I	L-glutamate biosynthesis I	L-glutamate biosynthesis I	L-glutamate biosynthesis I	GLUTSYN-PWY	L-glutamate biosynthesis I
Biosynthesis	Amino Acid Biosynthesis	Proteinogenic Amino Acid Biosynthesis	L-glutamate Biosynthesis	L-glutamate biosynthesis II	L-glutamate biosynthesis II	L-glutamate biosynthesis II	L-glutamate biosynthesis II	GLUTAMATE-SYN2-PWY	L-glutamate biosynthesis II
Biosynthesis	Amino Acid Biosynthesis	Proteinogenic Amino Acid Biosynthesis	L-glutamate Biosynthesis	L-glutamate biosynthesis III	L-glutamate biosynthesis III	L-glutamate biosynthesis III	L-glutamate biosynthesis III	GLUTSYNIII-PWY	L-glutamate biosynthesis III
Biosynthesis	Amino Acid Biosynthesis	Proteinogenic Amino Acid Biosynthesis	L-glutamate Biosynthesis	L-glutamate biosynthesis IV	L-glutamate biosynthesis IV	L-glutamate biosynthesis IV	L-glutamate biosynthesis IV	GLUGLNSYN-PWY	L-glutamate biosynthesis IV
Biosynthesis	Amino Acid Biosynthesis	Proteinogenic Amino Acid Biosynthesis	L-glutamate Biosynthesis	L-glutamate biosynthesis V	L-glutamate biosynthesis V	L-glutamate biosynthesis V	L-glutamate biosynthesis V	PWY-4341	L-glutamate biosynthesis V
Biosynthesis	Amino Acid Biosynthesis	Proteinogenic Amino Acid Biosynthesis	L-glutamine Biosynthesis	L-glutamate and L-glutamine biosynthesis	L-glutamate and L-glutamine biosynthesis	L-glutamate and L-glutamine biosynthesis	L-glutamate and L-glutamine biosynthesis	PWY-5505	L-glutamate and L-glutamine biosynthesis
Biosynthesis	Amino Acid Biosynthesis	Proteinogenic Amino Acid Biosynthesis	L-glutamine Biosynthesis	L-glutamine biosynthesis I	L-glutamine biosynthesis I	L-glutamine biosynthesis I	L-glutamine biosynthesis I	GLNSYN-PWY	L-glutamine biosynthesis I
Biosynthesis	Amino Acid Biosynthesis	Proteinogenic Amino Acid Biosynthesis	L-glutamine Biosynthesis	L-glutamine biosynthesis III	L-glutamine biosynthesis III	L-glutamine biosynthesis III	L-glutamine biosynthesis III	PWY-6549	L-glutamine biosynthesis III
Biosynthesis	Amino Acid Biosynthesis	Proteinogenic Amino Acid Biosynthesis	L-histidine Biosynthesis	imidazole-lactate degradation	imidazole-lactate degradation	imidazole-lactate degradation	imidazole-lactate degradation	PWY-5029	imidazole-lactate degradation
Biosynthesis	Amino Acid Biosynthesis	Proteinogenic Amino Acid Biosynthesis	L-histidine Biosynthesis	L-histidine biosynthesis	L-histidine biosynthesis	L-histidine biosynthesis	L-histidine biosynthesis	HISTSYN-PWY	L-histidine biosynthesis
Biosynthesis	Amino Acid Biosynthesis	Proteinogenic Amino Acid Biosynthesis	L-isoleucine Biosynthesis	L-isoleucine biosynthesis I (from threonine)	L-isoleucine biosynthesis I (from threonine)	L-isoleucine biosynthesis I (from threonine)	L-isoleucine biosynthesis I (from threonine)	ILEUSYN-PWY	L-isoleucine biosynthesis I (from threonine)
Biosynthesis	Amino Acid Biosynthesis	Proteinogenic Amino Acid Biosynthesis	L-isoleucine Biosynthesis	L-isoleucine biosynthesis II	L-isoleucine biosynthesis II	L-isoleucine biosynthesis II	L-isoleucine biosynthesis II	PWY-5101	L-isoleucine biosynthesis II
Biosynthesis	Amino Acid Biosynthesis	Proteinogenic Amino Acid Biosynthesis	L-isoleucine Biosynthesis	L-isoleucine biosynthesis III	L-isoleucine biosynthesis III	L-isoleucine biosynthesis III	L-isoleucine biosynthesis III	PWY-5103	L-isoleucine biosynthesis III
Biosynthesis	Amino Acid Biosynthesis	Proteinogenic Amino Acid Biosynthesis	L-isoleucine Biosynthesis	L-isoleucine biosynthesis IV	L-isoleucine biosynthesis IV	L-isoleucine biosynthesis IV	L-isoleucine biosynthesis IV	PWY-5104	L-isoleucine biosynthesis IV
Biosynthesis	Amino Acid Biosynthesis	Proteinogenic Amino Acid Biosynthesis	L-isoleucine Biosynthesis	L-isoleucine biosynthesis V	L-isoleucine biosynthesis V	L-isoleucine biosynthesis V	L-isoleucine biosynthesis V	PWY-5108	L-isoleucine biosynthesis V
Biosynthesis	Amino Acid Biosynthesis	Proteinogenic Amino Acid Biosynthesis	L-isoleucine Biosynthesis	superpathway of L-isoleucine biosynthesis I	superpathway of L-isoleucine biosynthesis I	superpathway of L-isoleucine biosynthesis I	superpathway of L-isoleucine biosynthesis I	PWY-3001	superpathway of L-isoleucine biosynthesis I
Biosynthesis	Amino Acid Biosynthesis	Proteinogenic Amino Acid Biosynthesis	L-leucine Biosynthesis	L-leucine biosynthesis	L-leucine biosynthesis	L-leucine biosynthesis	L-leucine biosynthesis	LEUSYN-PWY	L-leucine biosynthesis
Biosynthesis	Amino Acid Biosynthesis	Proteinogenic Amino Acid Biosynthesis	L-lysine Biosynthesis	L-lysine biosynthesis I	L-lysine biosynthesis I	L-lysine biosynthesis I	L-lysine biosynthesis I	DAPLYSINESYN-PWY	L-lysine biosynthesis I
Biosynthesis	Amino Acid Biosynthesis	Proteinogenic Amino Acid Biosynthesis	L-lysine Biosynthesis	L-lysine biosynthesis II	L-lysine biosynthesis II	L-lysine biosynthesis II	L-lysine biosynthesis II	PWY-2941	L-lysine biosynthesis II
Biosynthesis	Amino Acid Biosynthesis	Proteinogenic Amino Acid Biosynthesis	L-lysine Biosynthesis	L-lysine biosynthesis III	L-lysine biosynthesis III	L-lysine biosynthesis III	L-lysine biosynthesis III	PWY-2942	L-lysine biosynthesis III
Biosynthesis	Amino Acid Biosynthesis	Proteinogenic Amino Acid Biosynthesis	L-lysine Biosynthesis	L-lysine biosynthesis IV	L-lysine biosynthesis IV	L-lysine biosynthesis IV	L-lysine biosynthesis IV	LYSINE-AMINOAD-PWY	L-lysine biosynthesis IV
Biosynthesis	Amino Acid Biosynthesis	Proteinogenic Amino Acid Biosynthesis	L-lysine Biosynthesis	L-lysine biosynthesis V	L-lysine biosynthesis V	L-lysine biosynthesis V	L-lysine biosynthesis V	PWY-3081	L-lysine biosynthesis V
Biosynthesis	Amino Acid Biosynthesis	Proteinogenic Amino Acid Biosynthesis	L-lysine Biosynthesis	L-lysine biosynthesis VI	L-lysine biosynthesis VI	L-lysine biosynthesis VI	L-lysine biosynthesis VI	PWY-5097	L-lysine biosynthesis VI
Biosynthesis	Amino Acid Biosynthesis	Proteinogenic Amino Acid Biosynthesis	L-methionine Biosynthesis	L-methionine De Novo Biosynthesis	L-methionine biosynthesis I	L-methionine biosynthesis I	L-methionine biosynthesis I	HOMOSER-METSYN-PWY	L-methionine biosynthesis I
Biosynthesis	Amino Acid Biosynthesis	Proteinogenic Amino Acid Biosynthesis	L-methionine Biosynthesis	L-methionine De Novo Biosynthesis	L-methionine biosynthesis II (plants)	L-methionine biosynthesis II (plants)	L-methionine biosynthesis II (plants)	PWY-702	L-methionine biosynthesis II (plants)
Biosynthesis	Amino Acid Biosynthesis	Proteinogenic Amino Acid Biosynthesis	L-methionine Biosynthesis	L-methionine De Novo Biosynthesis	L-methionine biosynthesis III	L-methionine biosynthesis III	L-methionine biosynthesis III	HSERMETANA-PWY	L-methionine biosynthesis III
Biosynthesis	Amino Acid Biosynthesis	Proteinogenic Amino Acid Biosynthesis	L-methionine Biosynthesis	L-methionine De Novo Biosynthesis	L-methionine biosynthesis IV (archaea)	L-methionine biosynthesis IV (archaea)	L-methionine biosynthesis IV (archaea)	PWY-7977	L-methionine biosynthesis IV (archaea)
Biosynthesis	Amino Acid Biosynthesis	Proteinogenic Amino Acid Biosynthesis	L-methionine Biosynthesis	L-methionine De Novo Biosynthesis	superpathway of L-homoserine and L-methionine biosynthesis	superpathway of L-homoserine and L-methionine biosynthesis	superpathway of L-homoserine and L-methionine biosynthesis	METSYN-PWY	superpathway of L-homoserine and L-methionine biosynthesis
Biosynthesis	Amino Acid Biosynthesis	Proteinogenic Amino Acid Biosynthesis	L-methionine Biosynthesis	L-methionine De Novo Biosynthesis	superpathway of L-methionine biosynthesis (by sulfhydrylation)	superpathway of L-methionine biosynthesis (by sulfhydrylation)	superpathway of L-methionine biosynthesis (by sulfhydrylation)	PWY-5345	superpathway of L-methionine biosynthesis (by sulfhydrylation)
Biosynthesis	Amino Acid Biosynthesis	Proteinogenic Amino Acid Biosynthesis	L-methionine Biosynthesis	L-methionine De Novo Biosynthesis	superpathway of L-methionine biosynthesis (transsulfuration)	superpathway of L-methionine biosynthesis (transsulfuration)	superpathway of L-methionine biosynthesis (transsulfuration)	PWY-5347	superpathway of L-methionine biosynthesis (transsulfuration)
Biosynthesis	Amino Acid Biosynthesis	Proteinogenic Amino Acid Biosynthesis	L-methionine Biosynthesis	L-methionine Salvage	S-adenosyl-L-methionine cycle	S-adenosyl-L-methionine cycle I	S-adenosyl-L-methionine cycle I	PWY-6151	S-adenosyl-L-methionine cycle I
Biosynthesis	Amino Acid Biosynthesis	Proteinogenic Amino Acid Biosynthesis	L-methionine Biosynthesis	L-methionine Salvage	S-adenosyl-L-methionine cycle	S-adenosyl-L-methionine cycle II	S-adenosyl-L-methionine cycle II	PWY-5041	S-adenosyl-L-methionine cycle II
Biosynthesis	Amino Acid Biosynthesis	Proteinogenic Amino Acid Biosynthesis	L-methionine Biosynthesis	L-methionine Salvage	S-methyl-5-thio-α-D-ribose 1-phosphate degradation	S-methyl-5-thio-α-D-ribose 1-phosphate degradation I	S-methyl-5-thio-α-D-ribose 1-phosphate degradation I	PWY-4361	S-methyl-5-thio-α-D-ribose 1-phosphate degradation I
Biosynthesis	Amino Acid Biosynthesis	Proteinogenic Amino Acid Biosynthesis	L-methionine Biosynthesis	L-methionine Salvage	S-methyl-5-thio-α-D-ribose 2-phosphate degradation	S-methyl-5-thio-α-D-ribose 1-phosphate degradation II	S-methyl-5-thio-α-D-ribose 1-phosphate degradation II	PWY-7174	S-methyl-5-thio-α-D-ribose 1-phosphate degradation II
Biosynthesis	Amino Acid Biosynthesis	Proteinogenic Amino Acid Biosynthesis	L-methionine Biosynthesis	L-methionine salvage cycle I (bacteria and plants)	L-methionine salvage cycle I (bacteria and plants)	L-methionine salvage cycle I (bacteria and plants)	L-methionine salvage cycle I (bacteria and plants)	PWY-7528	L-methionine salvage cycle I (bacteria and plants)
Biosynthesis	Amino Acid Biosynthesis	Proteinogenic Amino Acid Biosynthesis	L-methionine Biosynthesis	L-methionine salvage cycle II (plants)	L-methionine salvage cycle II (plants)	L-methionine salvage cycle II (plants)	L-methionine salvage cycle II (plants)	PWY-7270	L-methionine salvage cycle II (plants)
Biosynthesis	Amino Acid Biosynthesis	Proteinogenic Amino Acid Biosynthesis	L-methionine Biosynthesis	L-methionine salvage cycle III	L-methionine salvage cycle III	L-methionine salvage cycle III	L-methionine salvage cycle III	PWY-7527	L-methionine salvage cycle III
Biosynthesis	Amino Acid Biosynthesis	Proteinogenic Amino Acid Biosynthesis	L-methionine Biosynthesis	L-methionine salvage from L-homocysteine	L-methionine salvage from L-homocysteine	L-methionine salvage from L-homocysteine	L-methionine salvage from L-homocysteine	ADENOSYLHOMOCYSCAT-PWY	L-methionine salvage from L-homocysteine
Biosynthesis	Amino Acid Biosynthesis	Proteinogenic Amino Acid Biosynthesis	L-methionine Biosynthesis	S-methyl-L-methionine cycle	S-methyl-L-methionine cycle	S-methyl-L-methionine cycle	S-methyl-L-methionine cycle	PWY-5441	S-methyl-L-methionine cycle
Biosynthesis	Amino Acid Biosynthesis	Proteinogenic Amino Acid Biosynthesis	L-phenylalanine Biosynthesis	L-phenylalanine biosynthesis I	L-phenylalanine biosynthesis I	L-phenylalanine biosynthesis I	L-phenylalanine biosynthesis I	PHESYN	L-phenylalanine biosynthesis I
Biosynthesis	Amino Acid Biosynthesis	Proteinogenic Amino Acid Biosynthesis	L-phenylalanine Biosynthesis	L-phenylalanine biosynthesis II	L-phenylalanine biosynthesis II	L-phenylalanine biosynthesis II	L-phenylalanine biosynthesis II	PWY-3462	L-phenylalanine biosynthesis II
Biosynthesis	Amino Acid Biosynthesis	Proteinogenic Amino Acid Biosynthesis	L-phenylalanine Biosynthesis	L-phenylalanine biosynthesis III (cytosolic, plants)	L-phenylalanine biosynthesis III (cytosolic, plants)	L-phenylalanine biosynthesis III (cytosolic, plants)	L-phenylalanine biosynthesis III (cytosolic, plants)	PWY-7432	L-phenylalanine biosynthesis III (cytosolic, plants)
Biosynthesis	Amino Acid Biosynthesis	Proteinogenic Amino Acid Biosynthesis	L-phenylalanine Biosynthesis	superpathway of L-phenylalanine biosynthesis	superpathway of L-phenylalanine biosynthesis	superpathway of L-phenylalanine biosynthesis	superpathway of L-phenylalanine biosynthesis	PWY-6628	superpathway of L-phenylalanine biosynthesis
Biosynthesis	Amino Acid Biosynthesis	Proteinogenic Amino Acid Biosynthesis	L-proline Biosynthesis	L-ornithine degradation I (L-proline biosynthesis)	L-ornithine degradation I (L-proline biosynthesis)	L-ornithine degradation I (L-proline biosynthesis)	L-ornithine degradation I (L-proline biosynthesis)	ORN-AMINOPENTANOATE-CAT-PWY	L-ornithine degradation I (L-proline biosynthesis)
Biosynthesis	Amino Acid Biosynthesis	Proteinogenic Amino Acid Biosynthesis	L-proline Biosynthesis	L-proline biosynthesis I (from L-glutamate)	L-proline biosynthesis I (from L-glutamate)	L-proline biosynthesis I (from L-glutamate)	L-proline biosynthesis I (from L-glutamate)	PROSYN-PWY	L-proline biosynthesis I (from L-glutamate)
Biosynthesis	Amino Acid Biosynthesis	Proteinogenic Amino Acid Biosynthesis	L-proline Biosynthesis	L-proline biosynthesis II (from arginine)	L-proline biosynthesis II (from arginine)	L-proline biosynthesis II (from arginine)	L-proline biosynthesis II (from arginine)	PWY-4981	L-proline biosynthesis II (from arginine)
Biosynthesis	Amino Acid Biosynthesis	Proteinogenic Amino Acid Biosynthesis	L-proline Biosynthesis	L-proline biosynthesis III (from L-ornithine)	L-proline biosynthesis III (from L-ornithine)	L-proline biosynthesis III (from L-ornithine)	L-proline biosynthesis III (from L-ornithine)	PWY-3341	L-proline biosynthesis III (from L-ornithine)
Biosynthesis	Amino Acid Biosynthesis	Proteinogenic Amino Acid Biosynthesis	L-proline Biosynthesis	L-proline biosynthesis IV	L-proline biosynthesis IV	L-proline biosynthesis IV	L-proline biosynthesis IV	PWY-4281	L-proline biosynthesis IV
Biosynthesis	Amino Acid Biosynthesis	Proteinogenic Amino Acid Biosynthesis	L-pyrrolysine Biosynthesis	L-pyrrolysine biosynthesis	L-pyrrolysine biosynthesis	L-pyrrolysine biosynthesis	L-pyrrolysine biosynthesis	PWY-6994	L-pyrrolysine biosynthesis
Biosynthesis	Amino Acid Biosynthesis	Proteinogenic Amino Acid Biosynthesis	L-selenocysteine Biosynthesis	L-selenocysteine biosynthesis I (bacteria)	L-selenocysteine biosynthesis I (bacteria)	L-selenocysteine biosynthesis I (bacteria)	L-selenocysteine biosynthesis I (bacteria)	PWY0-901	L-selenocysteine biosynthesis I (bacteria)
Biosynthesis	Amino Acid Biosynthesis	Proteinogenic Amino Acid Biosynthesis	L-selenocysteine Biosynthesis	L-selenocysteine biosynthesis II (archaea and eukaryotes)	L-selenocysteine biosynthesis II (archaea and eukaryotes)	L-selenocysteine biosynthesis II (archaea and eukaryotes)	L-selenocysteine biosynthesis II (archaea and eukaryotes)	PWY-6281	L-selenocysteine biosynthesis II (archaea and eukaryotes)
Biosynthesis	Amino Acid Biosynthesis	Proteinogenic Amino Acid Biosynthesis	L-serine Biosynthesis	L-serine biosynthesis I	L-serine biosynthesis I	L-serine biosynthesis I	L-serine biosynthesis I	SERSYN-PWY	L-serine biosynthesis I
Biosynthesis	Amino Acid Biosynthesis	Proteinogenic Amino Acid Biosynthesis	L-serine Biosynthesis	L-serine biosynthesis II	L-serine biosynthesis II	L-serine biosynthesis II	L-serine biosynthesis II	PWY-8011	L-serine biosynthesis II
Biosynthesis	Amino Acid Biosynthesis	Proteinogenic Amino Acid Biosynthesis	L-threonine Biosynthesis	L-threonine biosynthesis	L-threonine biosynthesis	L-threonine biosynthesis	L-threonine biosynthesis	HOMOSER-THRESYN-PWY	L-threonine biosynthesis
Biosynthesis	Amino Acid Biosynthesis	Proteinogenic Amino Acid Biosynthesis	L-threonine Biosynthesis	superpathway of L-threonine biosynthesis	superpathway of L-threonine biosynthesis	superpathway of L-threonine biosynthesis	superpathway of L-threonine biosynthesis	THRESYN-PWY	superpathway of L-threonine biosynthesis
Biosynthesis	Amino Acid Biosynthesis	Proteinogenic Amino Acid Biosynthesis	L-tryptophan Biosynthesis	L-tryptophan biosynthesis	L-tryptophan biosynthesis	L-tryptophan biosynthesis	L-tryptophan biosynthesis	TRPSYN-PWY	L-tryptophan biosynthesis
Biosynthesis	Amino Acid Biosynthesis	Proteinogenic Amino Acid Biosynthesis	L-tryptophan Biosynthesis	superpathway of L-tryptophan biosynthesis	superpathway of L-tryptophan biosynthesis	superpathway of L-tryptophan biosynthesis	superpathway of L-tryptophan biosynthesis	PWY-6629	superpathway of L-tryptophan biosynthesis
Biosynthesis	Amino Acid Biosynthesis	Proteinogenic Amino Acid Biosynthesis	L-tyrosine Biosynthesis	L-tyrosine biosynthesis I	L-tyrosine biosynthesis I	L-tyrosine biosynthesis I	L-tyrosine biosynthesis I	TYRSYN	L-tyrosine biosynthesis I
Biosynthesis	Amino Acid Biosynthesis	Proteinogenic Amino Acid Biosynthesis	L-tyrosine Biosynthesis	L-tyrosine biosynthesis II	L-tyrosine biosynthesis II	L-tyrosine biosynthesis II	L-tyrosine biosynthesis II	PWY-3461	L-tyrosine biosynthesis II
Biosynthesis	Amino Acid Biosynthesis	Proteinogenic Amino Acid Biosynthesis	L-tyrosine Biosynthesis	L-tyrosine biosynthesis III	L-tyrosine biosynthesis III	L-tyrosine biosynthesis III	L-tyrosine biosynthesis III	PWY-6120	L-tyrosine biosynthesis III
Biosynthesis	Amino Acid Biosynthesis	Proteinogenic Amino Acid Biosynthesis	L-tyrosine Biosynthesis	L-tyrosine biosynthesis IV	L-tyrosine biosynthesis IV	L-tyrosine biosynthesis IV	L-tyrosine biosynthesis IV	PWY-6134	L-tyrosine biosynthesis IV
Biosynthesis	Amino Acid Biosynthesis	Proteinogenic Amino Acid Biosynthesis	L-tyrosine Biosynthesis	superpathway of L-tyrosine biosynthesis	superpathway of L-tyrosine biosynthesis	superpathway of L-tyrosine biosynthesis	superpathway of L-tyrosine biosynthesis	PWY-6630	superpathway of L-tyrosine biosynthesis
Biosynthesis	Amino Acid Biosynthesis	Proteinogenic Amino Acid Biosynthesis	L-valine Biosynthesis	L-valine biosynthesis	L-valine biosynthesis	L-valine biosynthesis	L-valine biosynthesis	VALSYN-PWY	L-valine biosynthesis
Biosynthesis	Amino Acid Biosynthesis	superpathway of aromatic amino acid biosynthesis	superpathway of aromatic amino acid biosynthesis	superpathway of aromatic amino acid biosynthesis	superpathway of aromatic amino acid biosynthesis	superpathway of aromatic amino acid biosynthesis	superpathway of aromatic amino acid biosynthesis	COMPLETE-ARO-PWY	superpathway of aromatic amino acid biosynthesis
Biosynthesis	Amino Acid Biosynthesis	superpathway of branched chain amino acid biosynthesis	superpathway of branched chain amino acid biosynthesis	superpathway of branched chain amino acid biosynthesis	superpathway of branched chain amino acid biosynthesis	superpathway of branched chain amino acid biosynthesis	superpathway of branched chain amino acid biosynthesis	BRANCHED-CHAIN-AA-SYN-PWY	superpathway of branched chain amino acid biosynthesis
Biosynthesis	Amino Acid Biosynthesis	superpathway of L-aspartate and L-asparagine biosynthesis	superpathway of L-aspartate and L-asparagine biosynthesis	superpathway of L-aspartate and L-asparagine biosynthesis	superpathway of L-aspartate and L-asparagine biosynthesis	superpathway of L-aspartate and L-asparagine biosynthesis	superpathway of L-aspartate and L-asparagine biosynthesis	ASPASN-PWY	superpathway of L-aspartate and L-asparagine biosynthesis
Biosynthesis	Amino Acid Biosynthesis	superpathway of L-lysine, L-threonine and L-methionine biosynthesis I	superpathway of L-lysine, L-threonine and L-methionine biosynthesis I	superpathway of L-lysine, L-threonine and L-methionine biosynthesis I	superpathway of L-lysine, L-threonine and L-methionine biosynthesis I	superpathway of L-lysine, L-threonine and L-methionine biosynthesis I	superpathway of L-lysine, L-threonine and L-methionine biosynthesis I	P4-PWY	superpathway of L-lysine, L-threonine and L-methionine biosynthesis I
Biosynthesis	Amino Acid Biosynthesis	superpathway of L-lysine, L-threonine and L-methionine biosynthesis II	superpathway of L-lysine, L-threonine and L-methionine biosynthesis II	superpathway of L-lysine, L-threonine and L-methionine biosynthesis II	superpathway of L-lysine, L-threonine and L-methionine biosynthesis II	superpathway of L-lysine, L-threonine and L-methionine biosynthesis II	superpathway of L-lysine, L-threonine and L-methionine biosynthesis II	PWY-724	superpathway of L-lysine, L-threonine and L-methionine biosynthesis II
Biosynthesis	Amino Acid Biosynthesis	superpathway of L-phenylalanine and L-tyrosine biosynthesis	superpathway of L-phenylalanine and L-tyrosine biosynthesis	superpathway of L-phenylalanine and L-tyrosine biosynthesis	superpathway of L-phenylalanine and L-tyrosine biosynthesis	superpathway of L-phenylalanine and L-tyrosine biosynthesis	superpathway of L-phenylalanine and L-tyrosine biosynthesis	PWY-3481	superpathway of L-phenylalanine and L-tyrosine biosynthesis
Biosynthesis	Amino Acid Biosynthesis	superpathway of L-serine and glycine biosynthesis I	superpathway of L-serine and glycine biosynthesis I	superpathway of L-serine and glycine biosynthesis I	superpathway of L-serine and glycine biosynthesis I	superpathway of L-serine and glycine biosynthesis I	superpathway of L-serine and glycine biosynthesis I	SER-GLYSYN-PWY	superpathway of L-serine and glycine biosynthesis I
Biosynthesis	Amino Acid Biosynthesis	superpathway of sulfur amino acid biosynthesis (Saccharomyces cerevisiae)	superpathway of sulfur amino acid biosynthesis (Saccharomyces cerevisiae)	superpathway of sulfur amino acid biosynthesis (Saccharomyces cerevisiae)	superpathway of sulfur amino acid biosynthesis (Saccharomyces cerevisiae)	superpathway of sulfur amino acid biosynthesis (Saccharomyces cerevisiae)	superpathway of sulfur amino acid biosynthesis (Saccharomyces cerevisiae)	PWY-821	superpathway of sulfur amino acid biosynthesis (Saccharomyces cerevisiae)
Biosynthesis	Aminoacyl-tRNA Charging	glutaminyl-tRNAgln biosynthesis via transamidation	glutaminyl-tRNAgln biosynthesis via transamidation	glutaminyl-tRNAgln biosynthesis via transamidation	glutaminyl-tRNAgln biosynthesis via transamidation	glutaminyl-tRNAgln biosynthesis via transamidation	glutaminyl-tRNAgln biosynthesis via transamidation	PWY-5921	glutaminyl-tRNAgln biosynthesis via transamidation
Biosynthesis	Aminoacyl-tRNA Charging	L-asparagine biosynthesis III (tRNA-dependent)	L-asparagine biosynthesis III (tRNA-dependent)	L-asparagine biosynthesis III (tRNA-dependent)	L-asparagine biosynthesis III (tRNA-dependent)	L-asparagine biosynthesis III (tRNA-dependent)	L-asparagine biosynthesis III (tRNA-dependent)	PWY490-4	L-asparagine biosynthesis III (tRNA-dependent)
Biosynthesis	Aminoacyl-tRNA Charging	L-cysteine biosynthesis II (tRNA-dependent)	L-cysteine biosynthesis II (tRNA-dependent)	L-cysteine biosynthesis II (tRNA-dependent)	L-cysteine biosynthesis II (tRNA-dependent)	L-cysteine biosynthesis II (tRNA-dependent)	L-cysteine biosynthesis II (tRNA-dependent)	PWY-6308	L-cysteine biosynthesis II (tRNA-dependent)
Biosynthesis	Aminoacyl-tRNA Charging	tRNA charging	tRNA charging	tRNA charging	tRNA charging	tRNA charging	tRNA charging	TRNA-CHARGING-PWY	tRNA charging
Biosynthesis	Aromatic Compound Biosynthesis	3-Dehydroquinate Biosynthesis	3-dehydroquinate biosynthesis I	3-dehydroquinate biosynthesis I	3-dehydroquinate biosynthesis I	3-dehydroquinate biosynthesis I	3-dehydroquinate biosynthesis I	PWY-6164	3-dehydroquinate biosynthesis I
Biosynthesis	Aromatic Compound Biosynthesis	3-Dehydroquinate Biosynthesis	3-dehydroquinate biosynthesis II (archaea)	3-dehydroquinate biosynthesis II (archaea)	3-dehydroquinate biosynthesis II (archaea)	3-dehydroquinate biosynthesis II (archaea)	3-dehydroquinate biosynthesis II (archaea)	PWY-6160	3-dehydroquinate biosynthesis II (archaea)
Biosynthesis	Aromatic Compound Biosynthesis	4-Hydroxybenzoate Biosynthesis	4-hydroxybenzoate biosynthesis I (eukaryotes)	4-hydroxybenzoate biosynthesis I (eukaryotes)	4-hydroxybenzoate biosynthesis I (eukaryotes)	4-hydroxybenzoate biosynthesis I (eukaryotes)	4-hydroxybenzoate biosynthesis I (eukaryotes)	PWY-5754	4-hydroxybenzoate biosynthesis I (eukaryotes)
Biosynthesis	Aromatic Compound Biosynthesis	4-Hydroxybenzoate Biosynthesis	4-hydroxybenzoate biosynthesis II (bacteria)	4-hydroxybenzoate biosynthesis II (bacteria)	4-hydroxybenzoate biosynthesis II (bacteria)	4-hydroxybenzoate biosynthesis II (bacteria)	4-hydroxybenzoate biosynthesis II (bacteria)	PWY-5755	4-hydroxybenzoate biosynthesis II (bacteria)
Biosynthesis	Aromatic Compound Biosynthesis	4-Hydroxybenzoate Biosynthesis	4-hydroxybenzoate biosynthesis III (plants)	4-hydroxybenzoate biosynthesis III (plants)	4-hydroxybenzoate biosynthesis III (plants)	4-hydroxybenzoate biosynthesis III (plants)	4-hydroxybenzoate biosynthesis III (plants)	PWY-6435	4-hydroxybenzoate biosynthesis III (plants)
Biosynthesis	Aromatic Compound Biosynthesis	4-Hydroxybenzoate Biosynthesis	4-hydroxybenzoate biosynthesis IV (plants)	4-hydroxybenzoate biosynthesis IV (plants)	4-hydroxybenzoate biosynthesis IV (plants)	4-hydroxybenzoate biosynthesis IV (plants)	4-hydroxybenzoate biosynthesis IV (plants)	PWY-6431	4-hydroxybenzoate biosynthesis IV (plants)
Biosynthesis	Aromatic Compound Biosynthesis	Benzoate Biosynthesis	benzoate biosynthesis I (CoA-dependent, β-oxidative)	benzoate biosynthesis I (CoA-dependent, β-oxidative)	benzoate biosynthesis I (CoA-dependent, β-oxidative)	benzoate biosynthesis I (CoA-dependent, β-oxidative)	benzoate biosynthesis I (CoA-dependent, β-oxidative)	PWY-6443	benzoate biosynthesis I (CoA-dependent, β-oxidative)
Biosynthesis	Aromatic Compound Biosynthesis	Benzoate Biosynthesis	benzoate biosynthesis II (CoA-independent, non-β-oxidative)	benzoate biosynthesis II (CoA-independent, non-β-oxidative)	benzoate biosynthesis II (CoA-independent, non-β-oxidative)	benzoate biosynthesis II (CoA-independent, non-β-oxidative)	benzoate biosynthesis II (CoA-independent, non-β-oxidative)	PWY-6444	benzoate biosynthesis II (CoA-independent, non-β-oxidative)
Biosynthesis	Aromatic Compound Biosynthesis	Benzoate Biosynthesis	benzoate biosynthesis III (CoA-dependent, non-β-oxidative)	benzoate biosynthesis III (CoA-dependent, non-β-oxidative)	benzoate biosynthesis III (CoA-dependent, non-β-oxidative)	benzoate biosynthesis III (CoA-dependent, non-β-oxidative)	benzoate biosynthesis III (CoA-dependent, non-β-oxidative)	PWY-6446	benzoate biosynthesis III (CoA-dependent, non-β-oxidative)
Biosynthesis	Aromatic Compound Biosynthesis	Benzoate Biosynthesis	salicin biosynthesis	salicin biosynthesis	salicin biosynthesis	salicin biosynthesis	salicin biosynthesis	PWY-6766	salicin biosynthesis
Biosynthesis	Aromatic Compound Biosynthesis	Benzoate Biosynthesis	salicortin biosynthesis	salicortin biosynthesis	salicortin biosynthesis	salicortin biosynthesis	salicortin biosynthesis	PWY-6763	salicortin biosynthesis
Biosynthesis	Aromatic Compound Biosynthesis	Chorismate Biosynthesis	chorismate biosynthesis from 3-dehydroquinate	chorismate biosynthesis from 3-dehydroquinate	chorismate biosynthesis from 3-dehydroquinate	chorismate biosynthesis from 3-dehydroquinate	chorismate biosynthesis from 3-dehydroquinate	PWY-6163	chorismate biosynthesis from 3-dehydroquinate
Biosynthesis	Aromatic Compound Biosynthesis	Chorismate Biosynthesis	chorismate biosynthesis I	chorismate biosynthesis I	chorismate biosynthesis I	chorismate biosynthesis I	chorismate biosynthesis I	ARO-PWY	chorismate biosynthesis I
Biosynthesis	Aromatic Compound Biosynthesis	Chorismate Biosynthesis	chorismate biosynthesis II (archaea)	chorismate biosynthesis II (archaea)	chorismate biosynthesis II (archaea)	chorismate biosynthesis II (archaea)	chorismate biosynthesis II (archaea)	PWY-6165	chorismate biosynthesis II (archaea)
Biosynthesis	Aromatic Compound Biosynthesis	Halogenated Aromatic Compound Biosynthesis	brominated pyrroles biosynthesis	brominated pyrroles biosynthesis	brominated pyrroles biosynthesis	brominated pyrroles biosynthesis	brominated pyrroles biosynthesis	PWY-7931	brominated pyrroles biosynthesis
Biosynthesis	Aromatic Compound Biosynthesis	Halogenated Aromatic Compound Biosynthesis	polybrominated biphenyls and diphenyl ethers biosynthesis	polybrominated biphenyls and diphenyl ethers biosynthesis	polybrominated biphenyls and diphenyl ethers biosynthesis	polybrominated biphenyls and diphenyl ethers biosynthesis	polybrominated biphenyls and diphenyl ethers biosynthesis	PWY-7932	polybrominated biphenyls and diphenyl ethers biosynthesis
Biosynthesis	Aromatic Compound Biosynthesis	Halogenated Aromatic Compound Biosynthesis	polybrominated dihydroxylated diphenyl ethers biosynthesis	polybrominated dihydroxylated diphenyl ethers biosynthesis	polybrominated dihydroxylated diphenyl ethers biosynthesis	polybrominated dihydroxylated diphenyl ethers biosynthesis	polybrominated dihydroxylated diphenyl ethers biosynthesis	PWY-7934	polybrominated dihydroxylated diphenyl ethers biosynthesis
Biosynthesis	Aromatic Compound Biosynthesis	Halogenated Aromatic Compound Biosynthesis	polybrominated phenols biosynthesis	polybrominated phenols biosynthesis	polybrominated phenols biosynthesis	polybrominated phenols biosynthesis	polybrominated phenols biosynthesis	PWY-7929	polybrominated phenols biosynthesis
Biosynthesis	Aromatic Compound Biosynthesis	Halogenated Aromatic Compound Biosynthesis	pyoluteorin biosynthesis	pyoluteorin biosynthesis	pyoluteorin biosynthesis	pyoluteorin biosynthesis	pyoluteorin biosynthesis	PWY-7930	pyoluteorin biosynthesis
Biosynthesis	Aromatic Compound Biosynthesis	Halogenated Aromatic Compound Biosynthesis	spongiadioxin C biosynthesis	spongiadioxin C biosynthesis	spongiadioxin C biosynthesis	spongiadioxin C biosynthesis	spongiadioxin C biosynthesis	PWY-7935	spongiadioxin C biosynthesis
Biosynthesis	Aromatic Compound Biosynthesis	Halogenated Aromatic Compound Biosynthesis	superpathway of polybrominated aromatic compound biosynthesis	superpathway of polybrominated aromatic compound biosynthesis	superpathway of polybrominated aromatic compound biosynthesis	superpathway of polybrominated aromatic compound biosynthesis	superpathway of polybrominated aromatic compound biosynthesis	PWY-7933	superpathway of polybrominated aromatic compound biosynthesis
Biosynthesis	Aromatic Compound Biosynthesis	Salicylate Biosynthesis	salicylate biosynthesis I	salicylate biosynthesis I	salicylate biosynthesis I	salicylate biosynthesis I	salicylate biosynthesis I	PWY-6406	salicylate biosynthesis I
Biosynthesis	Aromatic Compound Biosynthesis	Salicylate Biosynthesis	salicylate biosynthesis II	salicylate biosynthesis II	salicylate biosynthesis II	salicylate biosynthesis II	salicylate biosynthesis II	PWY-981	salicylate biosynthesis II
Biosynthesis	Aromatic Compound Biosynthesis	Salicylate Biosynthesis	salicylate glucosides biosynthesis I	salicylate glucosides biosynthesis I	salicylate glucosides biosynthesis I	salicylate glucosides biosynthesis I	salicylate glucosides biosynthesis I	PWY-6621	salicylate glucosides biosynthesis I
Biosynthesis	Aromatic Compound Biosynthesis	Salicylate Biosynthesis	salicylate glucosides biosynthesis II	salicylate glucosides biosynthesis II	salicylate glucosides biosynthesis II	salicylate glucosides biosynthesis II	salicylate glucosides biosynthesis II	PWY-6623	salicylate glucosides biosynthesis II
Biosynthesis	Aromatic Compound Biosynthesis	Salicylate Biosynthesis	salicylate glucosides biosynthesis III	salicylate glucosides biosynthesis III	salicylate glucosides biosynthesis III	salicylate glucosides biosynthesis III	salicylate glucosides biosynthesis III	PWY-6624	salicylate glucosides biosynthesis III
Biosynthesis	Aromatic Compound Biosynthesis	Salicylate Biosynthesis	salicylate glucosides biosynthesis IV	salicylate glucosides biosynthesis IV	salicylate glucosides biosynthesis IV	salicylate glucosides biosynthesis IV	salicylate glucosides biosynthesis IV	PWY-6762	salicylate glucosides biosynthesis IV
Biosynthesis	Aromatic Compound Biosynthesis	Volatile Benzenoid Biosynthesis	guaiacol biosynthesis	guaiacol biosynthesis	guaiacol biosynthesis	guaiacol biosynthesis	guaiacol biosynthesis	PWY18C3-23	guaiacol biosynthesis
Biosynthesis	Aromatic Compound Biosynthesis	Volatile Benzenoid Biosynthesis	methylsalicylate biosynthesis	methylsalicylate biosynthesis	methylsalicylate biosynthesis	methylsalicylate biosynthesis	methylsalicylate biosynthesis	PWY18C3-22	methylsalicylate biosynthesis
Biosynthesis	Aromatic Compound Biosynthesis	Volatile Benzenoid Biosynthesis	volatile benzenoid biosynthesis I (ester formation)	volatile benzenoid biosynthesis I (ester formation)	volatile benzenoid biosynthesis I (ester formation)	volatile benzenoid biosynthesis I (ester formation)	volatile benzenoid biosynthesis I (ester formation)	PWY-4203	volatile benzenoid biosynthesis I (ester formation)
Biosynthesis	Aromatic Compound Biosynthesis	1,3,5-trimethoxybenzene biosynthesis	1,3,5-trimethoxybenzene biosynthesis	1,3,5-trimethoxybenzene biosynthesis	1,3,5-trimethoxybenzene biosynthesis	1,3,5-trimethoxybenzene biosynthesis	1,3,5-trimethoxybenzene biosynthesis	PWY-5765	1,3,5-trimethoxybenzene biosynthesis
Biosynthesis	Aromatic Compound Biosynthesis	2,3-dihydroxybenzoate biosynthesis	2,3-dihydroxybenzoate biosynthesis	2,3-dihydroxybenzoate biosynthesis	2,3-dihydroxybenzoate biosynthesis	2,3-dihydroxybenzoate biosynthesis	2,3-dihydroxybenzoate biosynthesis	PWY-5901	2,3-dihydroxybenzoate biosynthesis
Biosynthesis	Aromatic Compound Biosynthesis	3,5-dimethoxytoluene biosynthesis	3,5-dimethoxytoluene biosynthesis	3,5-dimethoxytoluene biosynthesis	3,5-dimethoxytoluene biosynthesis	3,5-dimethoxytoluene biosynthesis	3,5-dimethoxytoluene biosynthesis	PWY-7076	3,5-dimethoxytoluene biosynthesis
Biosynthesis	Aromatic Compound Biosynthesis	3-dimethylallyl-4-hydroxybenzoate biosynthesis	3-dimethylallyl-4-hydroxybenzoate biosynthesis	3-dimethylallyl-4-hydroxybenzoate biosynthesis	3-dimethylallyl-4-hydroxybenzoate biosynthesis	3-dimethylallyl-4-hydroxybenzoate biosynthesis	3-dimethylallyl-4-hydroxybenzoate biosynthesis	PWY-7303	3-dimethylallyl-4-hydroxybenzoate biosynthesis
Biosynthesis	Aromatic Compound Biosynthesis	4-hydroxyphenylpyruvate biosynthesis	4-hydroxyphenylpyruvate biosynthesis	4-hydroxyphenylpyruvate biosynthesis	4-hydroxyphenylpyruvate biosynthesis	4-hydroxyphenylpyruvate biosynthesis	4-hydroxyphenylpyruvate biosynthesis	PWY-5886	4-hydroxyphenylpyruvate biosynthesis
Biosynthesis	Aromatic Compound Biosynthesis	o-diquinones biosynthesis	o-diquinones biosynthesis	o-diquinones biosynthesis	o-diquinones biosynthesis	o-diquinones biosynthesis	o-diquinones biosynthesis	PWY-6752	o-diquinones biosynthesis
Biosynthesis	Aromatic Compound Biosynthesis	benzoyl-CoA biosynthesis	benzoyl-CoA biosynthesis	benzoyl-CoA biosynthesis	benzoyl-CoA biosynthesis	benzoyl-CoA biosynthesis	benzoyl-CoA biosynthesis	PWY-6458	benzoyl-CoA biosynthesis
Biosynthesis	Aromatic Compound Biosynthesis	benzoylanthranilate biosynthesis	benzoylanthranilate biosynthesis	benzoylanthranilate biosynthesis	benzoylanthranilate biosynthesis	benzoylanthranilate biosynthesis	benzoylanthranilate biosynthesis	PWY-6323	benzoylanthranilate biosynthesis
Biosynthesis	Aromatic Compound Biosynthesis	cinnamoyl-CoA biosynthesis	cinnamoyl-CoA biosynthesis	cinnamoyl-CoA biosynthesis	cinnamoyl-CoA biosynthesis	cinnamoyl-CoA biosynthesis	cinnamoyl-CoA biosynthesis	PWY-6457	cinnamoyl-CoA biosynthesis
Biosynthesis	Aromatic Compound Biosynthesis	dipicolinate biosynthesis	dipicolinate biosynthesis	dipicolinate biosynthesis	dipicolinate biosynthesis	dipicolinate biosynthesis	dipicolinate biosynthesis	PWY-8088	dipicolinate biosynthesis
Biosynthesis	Aromatic Compound Biosynthesis	gallate biosynthesis	gallate biosynthesis	gallate biosynthesis	gallate biosynthesis	gallate biosynthesis	gallate biosynthesis	PWY-6707	gallate biosynthesis
Biosynthesis	Aromatic Compound Biosynthesis	oligomeric urushiol biosynthesis	oligomeric urushiol biosynthesis	oligomeric urushiol biosynthesis	oligomeric urushiol biosynthesis	oligomeric urushiol biosynthesis	oligomeric urushiol biosynthesis	PWY-5787	oligomeric urushiol biosynthesis
Biosynthesis	Aromatic Compound Biosynthesis	phaselate biosynthesis	phaselate biosynthesis	phaselate biosynthesis	phaselate biosynthesis	phaselate biosynthesis	phaselate biosynthesis	PWY-6320	phaselate biosynthesis
Biosynthesis	Aromatic Compound Biosynthesis	phenolic malonylglucosides biosynthesis	phenolic malonylglucosides biosynthesis	phenolic malonylglucosides biosynthesis	phenolic malonylglucosides biosynthesis	phenolic malonylglucosides biosynthesis	phenolic malonylglucosides biosynthesis	PWY-6930	phenolic malonylglucosides biosynthesis
Biosynthesis	Aromatic Compound Biosynthesis	phenylethanol biosynthesis	phenylethanol biosynthesis	phenylethanol biosynthesis	phenylethanol biosynthesis	phenylethanol biosynthesis	phenylethanol biosynthesis	PWY-5751	phenylethanol biosynthesis
Biosynthesis	Aromatic Compound Biosynthesis	phenylethanol glycoconjugate biosynthesis	phenylethanol glycoconjugate biosynthesis	phenylethanol glycoconjugate biosynthesis	phenylethanol glycoconjugate biosynthesis	phenylethanol glycoconjugate biosynthesis	phenylethanol glycoconjugate biosynthesis	PWY-7074	phenylethanol glycoconjugate biosynthesis
Biosynthesis	Aromatic Compound Biosynthesis	phenylethyl acetate biosynthesis	phenylethyl acetate biosynthesis	phenylethyl acetate biosynthesis	phenylethyl acetate biosynthesis	phenylethyl acetate biosynthesis	phenylethyl acetate biosynthesis	PWY-7075	phenylethyl acetate biosynthesis
Biosynthesis	Carbohydrate Biosynthesis	Acetaldehyde Biosynthesis	acetaldehyde biosynthesis I	acetaldehyde biosynthesis I	acetaldehyde biosynthesis I	acetaldehyde biosynthesis I	acetaldehyde biosynthesis I	PWY-6333	acetaldehyde biosynthesis I
Biosynthesis	Carbohydrate Biosynthesis	Acetaldehyde Biosynthesis	acetaldehyde biosynthesis II	acetaldehyde biosynthesis II	acetaldehyde biosynthesis II	acetaldehyde biosynthesis II	acetaldehyde biosynthesis II	PWY-6330	acetaldehyde biosynthesis II
Biosynthesis	Carbohydrate Biosynthesis	Alkane Biosynthesis	alkane biosynthesis I	alkane biosynthesis I	alkane biosynthesis I	alkane biosynthesis I	alkane biosynthesis I	PWY-7032	alkane biosynthesis I
Biosynthesis	Carbohydrate Biosynthesis	Alkane Biosynthesis	alkane biosynthesis II	alkane biosynthesis II	alkane biosynthesis II	alkane biosynthesis II	alkane biosynthesis II	PWY-7033	alkane biosynthesis II
Biosynthesis	Carbohydrate Biosynthesis	Alkane Biosynthesis	heptadecane biosynthesis	heptadecane biosynthesis	heptadecane biosynthesis	heptadecane biosynthesis	heptadecane biosynthesis	PWY-6622	heptadecane biosynthesis
Biosynthesis	Carbohydrate Biosynthesis	Glycan Biosynthesis	Polysaccharide Biosynthesis	Alginate Biosynthesis	alginate biosynthesis I (algal)	alginate biosynthesis I (algal)	alginate biosynthesis I (algal)	PWY-6073	alginate biosynthesis I (algal)
Biosynthesis	Carbohydrate Biosynthesis	Glycan Biosynthesis	Polysaccharide Biosynthesis	Alginate Biosynthesis	alginate biosynthesis II (bacterial)	alginate biosynthesis II (bacterial)	alginate biosynthesis II (bacterial)	PWY-6082	alginate biosynthesis II (bacterial)
Biosynthesis	Carbohydrate Biosynthesis	Glycan Biosynthesis	Polysaccharide Biosynthesis	Glycogen and Starch Biosynthesis	glycogen biosynthesis I (from ADP-D-Glucose)	glycogen biosynthesis I (from ADP-D-Glucose)	glycogen biosynthesis I (from ADP-D-Glucose)	GLYCOGENSYNTH-PWY	glycogen biosynthesis I (from ADP-D-Glucose)
Biosynthesis	Carbohydrate Biosynthesis	Glycan Biosynthesis	Polysaccharide Biosynthesis	Glycogen and Starch Biosynthesis	glycogen biosynthesis II (from UDP-D-Glucose)	glycogen biosynthesis II (from UDP-D-Glucose)	glycogen biosynthesis II (from UDP-D-Glucose)	PWY-5067	glycogen biosynthesis II (from UDP-D-Glucose)
Biosynthesis	Carbohydrate Biosynthesis	Glycan Biosynthesis	Polysaccharide Biosynthesis	Glycogen and Starch Biosynthesis	glycogen biosynthesis III (from α-maltose 1-phosphate)	glycogen biosynthesis III (from α-maltose 1-phosphate)	glycogen biosynthesis III (from α-maltose 1-phosphate)	PWY-7900	glycogen biosynthesis III (from α-maltose 1-phosphate)
Biosynthesis	Carbohydrate Biosynthesis	Glycan Biosynthesis	Polysaccharide Biosynthesis	Glycogen and Starch Biosynthesis	starch biosynthesis	starch biosynthesis	starch biosynthesis	PWY-622	starch biosynthesis
Biosynthesis	Carbohydrate Biosynthesis	Glycan Biosynthesis	Polysaccharide Biosynthesis	Glycosaminoglycan Biosynthesis	chondroitin biosynthesis	chondroitin biosynthesis	chondroitin biosynthesis	PWY-6566	chondroitin biosynthesis
Biosynthesis	Carbohydrate Biosynthesis	Glycan Biosynthesis	Polysaccharide Biosynthesis	Glycosaminoglycan Biosynthesis	chondroitin sulfate biosynthesis	chondroitin sulfate biosynthesis	chondroitin sulfate biosynthesis	PWY-6569	chondroitin sulfate biosynthesis
Biosynthesis	Carbohydrate Biosynthesis	Glycan Biosynthesis	Polysaccharide Biosynthesis	Glycosaminoglycan Biosynthesis	chondroitin sulfate biosynthesis (late stages)	chondroitin sulfate biosynthesis (late stages)	chondroitin sulfate biosynthesis (late stages)	PWY-6567	chondroitin sulfate biosynthesis (late stages)
Biosynthesis	Carbohydrate Biosynthesis	Glycan Biosynthesis	Polysaccharide Biosynthesis	Glycosaminoglycan Biosynthesis	dermatan sulfate biosynthesis	dermatan sulfate biosynthesis	dermatan sulfate biosynthesis	PWY-6571	dermatan sulfate biosynthesis
Biosynthesis	Carbohydrate Biosynthesis	Glycan Biosynthesis	Polysaccharide Biosynthesis	Glycosaminoglycan Biosynthesis	dermatan sulfate biosynthesis (late stages)	dermatan sulfate biosynthesis (late stages)	dermatan sulfate biosynthesis (late stages)	PWY-6568	dermatan sulfate biosynthesis (late stages)
Biosynthesis	Carbohydrate Biosynthesis	Glycan Biosynthesis	Polysaccharide Biosynthesis	Glycosaminoglycan Biosynthesis	glycosaminoglycan-protein linkage region biosynthesis	glycosaminoglycan-protein linkage region biosynthesis	glycosaminoglycan-protein linkage region biosynthesis	PWY-6557	glycosaminoglycan-protein linkage region biosynthesis
Biosynthesis	Carbohydrate Biosynthesis	Glycan Biosynthesis	Polysaccharide Biosynthesis	Glycosaminoglycan Biosynthesis	heparan sulfate biosynthesis	heparan sulfate biosynthesis	heparan sulfate biosynthesis	PWY-6564	heparan sulfate biosynthesis
Biosynthesis	Carbohydrate Biosynthesis	Glycan Biosynthesis	Polysaccharide Biosynthesis	Glycosaminoglycan Biosynthesis	heparan sulfate biosynthesis (late stages)	heparan sulfate biosynthesis (late stages)	heparan sulfate biosynthesis (late stages)	PWY-6558	heparan sulfate biosynthesis (late stages)
Biosynthesis	Carbohydrate Biosynthesis	Glycan Biosynthesis	Polysaccharide Biosynthesis	1,3-β-D-glucan biosynthesis	1,3-β-D-glucan biosynthesis	1,3-β-D-glucan biosynthesis	1,3-β-D-glucan biosynthesis	PWY-6773	1,3-β-D-glucan biosynthesis
Biosynthesis	Carbohydrate Biosynthesis	Glycan Biosynthesis	Polysaccharide Biosynthesis	acetan biosynthesis	acetan biosynthesis	acetan biosynthesis	acetan biosynthesis	PWY-6658	acetan biosynthesis
Biosynthesis	Carbohydrate Biosynthesis	Glycan Biosynthesis	Polysaccharide Biosynthesis	carrageenan biosynthesis	carrageenan biosynthesis	carrageenan biosynthesis	carrageenan biosynthesis	PWY-6403	carrageenan biosynthesis
Biosynthesis	Carbohydrate Biosynthesis	Glycan Biosynthesis	Polysaccharide Biosynthesis	cellulose biosynthesis	cellulose biosynthesis	cellulose biosynthesis	cellulose biosynthesis	PWY-1001	cellulose biosynthesis
Biosynthesis	Carbohydrate Biosynthesis	Glycan Biosynthesis	Polysaccharide Biosynthesis	chitin biosynthesis	chitin biosynthesis	chitin biosynthesis	chitin biosynthesis	PWY-6981	chitin biosynthesis
Biosynthesis	Carbohydrate Biosynthesis	Glycan Biosynthesis	Polysaccharide Biosynthesis	fructan biosynthesis	fructan biosynthesis	fructan biosynthesis	fructan biosynthesis	PWY-822	fructan biosynthesis
Biosynthesis	Carbohydrate Biosynthesis	Glycan Biosynthesis	Polysaccharide Biosynthesis	homogalacturonan biosynthesis	homogalacturonan biosynthesis	homogalacturonan biosynthesis	homogalacturonan biosynthesis	PWY-1061	homogalacturonan biosynthesis
Biosynthesis	Carbohydrate Biosynthesis	Glycan Biosynthesis	Polysaccharide Biosynthesis	xylogalacturonan biosynthesis	xylogalacturonan biosynthesis	xylogalacturonan biosynthesis	xylogalacturonan biosynthesis	PWY-5980	xylogalacturonan biosynthesis
Biosynthesis	Carbohydrate Biosynthesis	Glycan Biosynthesis	Polysaccharide Biosynthesis	xyloglucan biosynthesis	xyloglucan biosynthesis	xyloglucan biosynthesis	xyloglucan biosynthesis	PWY-5936	xyloglucan biosynthesis
Biosynthesis	Carbohydrate Biosynthesis	Glycan Biosynthesis	Protein Glycosylation	α-dystroglycan glycosylation	α-dystroglycan glycosylation	α-dystroglycan glycosylation	α-dystroglycan glycosylation	PWY-7981	α-dystroglycan glycosylation
Biosynthesis	Carbohydrate Biosynthesis	Glycan Biosynthesis	Protein Glycosylation	ABH and Lewis epitopes biosynthesis from type 1 precursor disaccharide	ABH and Lewis epitopes biosynthesis from type 1 precursor disaccharide	ABH and Lewis epitopes biosynthesis from type 1 precursor disaccharide	ABH and Lewis epitopes biosynthesis from type 1 precursor disaccharide	PWY-7832	ABH and Lewis epitopes biosynthesis from type 1 precursor disaccharide
Biosynthesis	Carbohydrate Biosynthesis	Glycan Biosynthesis	Protein Glycosylation	ABH and Lewis epitopes biosynthesis from type 2 precursor disaccharide	ABH and Lewis epitopes biosynthesis from type 2 precursor disaccharide	ABH and Lewis epitopes biosynthesis from type 2 precursor disaccharide	ABH and Lewis epitopes biosynthesis from type 2 precursor disaccharide	PWY-7831	ABH and Lewis epitopes biosynthesis from type 2 precursor disaccharide
Biosynthesis	Carbohydrate Biosynthesis	Glycan Biosynthesis	Protein Glycosylation	biosynthesis of Lewis epitopes (H. pylori)	biosynthesis of Lewis epitopes (H. pylori)	biosynthesis of Lewis epitopes (H. pylori)	biosynthesis of Lewis epitopes (H. pylori)	PWY-7833	biosynthesis of Lewis epitopes (H. pylori)
Biosynthesis	Carbohydrate Biosynthesis	Glycan Biosynthesis	Protein Glycosylation	complex N-linked glycan biosynthesis (plants)	complex N-linked glycan biosynthesis (plants)	complex N-linked glycan biosynthesis (plants)	complex N-linked glycan biosynthesis (plants)	PWY-7920	complex N-linked glycan biosynthesis (plants)
Biosynthesis	Carbohydrate Biosynthesis	Glycan Biosynthesis	Protein Glycosylation	complex N-linked glycan biosynthesis (vertebrates)	complex N-linked glycan biosynthesis (vertebrates)	complex N-linked glycan biosynthesis (vertebrates)	complex N-linked glycan biosynthesis (vertebrates)	PWY-7426	complex N-linked glycan biosynthesis (vertebrates)
Biosynthesis	Carbohydrate Biosynthesis	Glycan Biosynthesis	Protein Glycosylation	glycosaminoglycan-protein linkage region biosynthesis	glycosaminoglycan-protein linkage region biosynthesis	glycosaminoglycan-protein linkage region biosynthesis	glycosaminoglycan-protein linkage region biosynthesis	PWY-6557	glycosaminoglycan-protein linkage region biosynthesis
Biosynthesis	Carbohydrate Biosynthesis	Glycan Biosynthesis	Protein Glycosylation	i antigen and I antigen biosynthesis	i antigen and I antigen biosynthesis	i antigen and I antigen biosynthesis	i antigen and I antigen biosynthesis	PWY-7837	i antigen and I antigen biosynthesis
Biosynthesis	Carbohydrate Biosynthesis	Glycan Biosynthesis	Protein Glycosylation	mucin core 1 and core 2 O-glycosylation	mucin core 1 and core 2 O-glycosylation	mucin core 1 and core 2 O-glycosylation	mucin core 1 and core 2 O-glycosylation	PWY-7433	mucin core 1 and core 2 O-glycosylation
Biosynthesis	Carbohydrate Biosynthesis	Glycan Biosynthesis	Protein Glycosylation	mucin core 3 and core 4 O-glycosylation	mucin core 3 and core 4 O-glycosylation	mucin core 3 and core 4 O-glycosylation	mucin core 3 and core 4 O-glycosylation	PWY-7435	mucin core 3 and core 4 O-glycosylation
Biosynthesis	Carbohydrate Biosynthesis	Glycan Biosynthesis	Protein Glycosylation	protein N-glycosylation (Haloferax volcanii)	protein N-glycosylation (Haloferax volcanii)	protein N-glycosylation (Haloferax volcanii)	protein N-glycosylation (Haloferax volcanii)	PWY-7661	protein N-glycosylation (Haloferax volcanii)
Biosynthesis	Carbohydrate Biosynthesis	Glycan Biosynthesis	Protein Glycosylation	protein N-glycosylation (Methanococcus voltae)	protein N-glycosylation (Methanococcus voltae)	protein N-glycosylation (Methanococcus voltae)	protein N-glycosylation (Methanococcus voltae)	PWY-7658	protein N-glycosylation (Methanococcus voltae)
Biosynthesis	Carbohydrate Biosynthesis	Glycan Biosynthesis	Protein Glycosylation	protein N-glycosylation (bacterial)	protein N-glycosylation (bacterial)	protein N-glycosylation (bacterial)	protein N-glycosylation (bacterial)	PWY-7031	protein N-glycosylation (bacterial)
Biosynthesis	Carbohydrate Biosynthesis	Glycan Biosynthesis	Protein Glycosylation	protein N-glycosylation initial phase (eukaryotic)	protein N-glycosylation initial phase (eukaryotic)	protein N-glycosylation initial phase (eukaryotic)	protein N-glycosylation initial phase (eukaryotic)	MANNOSYL-CHITO-DOLICHOL-BIOSYNTHESIS	protein N-glycosylation initial phase (eukaryotic)
Biosynthesis	Carbohydrate Biosynthesis	Glycan Biosynthesis	Protein Glycosylation	protein N-glycosylation processing phase (plants and animals)	protein N-glycosylation processing phase (plants and animals)	protein N-glycosylation processing phase (plants and animals)	protein N-glycosylation processing phase (plants and animals)	PWY-7919	protein N-glycosylation processing phase (plants and animals)
Biosynthesis	Carbohydrate Biosynthesis	Glycan Biosynthesis	Protein Glycosylation	protein N-glycosylation processing phase (yeast)	protein N-glycosylation processing phase (yeast)	protein N-glycosylation processing phase (yeast)	protein N-glycosylation processing phase (yeast)	PWY-7918	protein N-glycosylation processing phase (yeast)
Biosynthesis	Carbohydrate Biosynthesis	Glycan Biosynthesis	Protein Glycosylation	protein O-glycosylation (Neisseria)	protein O-glycosylation (Neisseria)	protein O-glycosylation (Neisseria)	protein O-glycosylation (Neisseria)	PWY-7037	protein O-glycosylation (Neisseria)
Biosynthesis	Carbohydrate Biosynthesis	Glycan Biosynthesis	Protein Glycosylation	protein O-mannosylation I (yeast)	protein O-mannosylation I (yeast)	protein O-mannosylation I (yeast)	protein O-mannosylation I (yeast)	PWY-7921	protein O-mannosylation I (yeast)
Biosynthesis	Carbohydrate Biosynthesis	Glycan Biosynthesis	Protein Glycosylation	protein O-mannosylation II (mammals, core M1 and core M2)	protein O-mannosylation II (mammals, core M1 and core M2)	protein O-mannosylation II (mammals, core M1 and core M2)	protein O-mannosylation II (mammals, core M1 and core M2)	PWY-7922	protein O-mannosylation II (mammals, core M1 and core M2)
Biosynthesis	Carbohydrate Biosynthesis	Glycan Biosynthesis	Protein Glycosylation	protein O-mannosylation III (mammals, core M3)	protein O-mannosylation III (mammals, core M3)	protein O-mannosylation III (mammals, core M3)	protein O-mannosylation III (mammals, core M3)	PWY-7979	protein O-mannosylation III (mammals, core M3)
Biosynthesis	Carbohydrate Biosynthesis	Glycan Biosynthesis	Protein Glycosylation	protein O-[N-acetyl]-glucosylation	protein O-[N-acetyl]-glucosylation	protein O-[N-acetyl]-glucosylation	protein O-[N-acetyl]-glucosylation	PWY-7437	protein O-[N-acetyl]-glucosylation
Biosynthesis	Carbohydrate Biosynthesis	Glycan Biosynthesis	Protein Glycosylation	terminal O-glycans residues modification (via type 2 precursor disaccharide)	terminal O-glycans residues modification (via type 2 precursor disaccharide)	terminal O-glycans residues modification (via type 2 precursor disaccharide)	terminal O-glycans residues modification (via type 2 precursor disaccharide)	PWY-7434	terminal O-glycans residues modification (via type 2 precursor disaccharide)
Biosynthesis	Carbohydrate Biosynthesis	Glycan Biosynthesis	chondroitin biosynthesis	chondroitin biosynthesis	chondroitin biosynthesis	chondroitin biosynthesis	chondroitin biosynthesis	PWY-6566	chondroitin biosynthesis
Biosynthesis	Carbohydrate Biosynthesis	Glycan Biosynthesis	glycosaminoglycan-protein linkage region biosynthesis	glycosaminoglycan-protein linkage region biosynthesis	glycosaminoglycan-protein linkage region biosynthesis	glycosaminoglycan-protein linkage region biosynthesis	glycosaminoglycan-protein linkage region biosynthesis	PWY-6557	glycosaminoglycan-protein linkage region biosynthesis
Biosynthesis	Carbohydrate Biosynthesis	Glycan Biosynthesis	lipid A-core biosynthesis (E. coli K-12)	lipid A-core biosynthesis (E. coli K-12)	lipid A-core biosynthesis (E. coli K-12)	lipid A-core biosynthesis (E. coli K-12)	lipid A-core biosynthesis (E. coli K-12)	LIPA-CORESYN-PWY	lipid A-core biosynthesis (E. coli K-12)
Biosynthesis	Carbohydrate Biosynthesis	Glycan Biosynthesis	xanthan biosynthesis	xanthan biosynthesis	xanthan biosynthesis	xanthan biosynthesis	xanthan biosynthesis	PWY-6655	xanthan biosynthesis
Biosynthesis	Carbohydrate Biosynthesis	Itaconate Biosynthesis	itaconate biosynthesis I	itaconate biosynthesis I	itaconate biosynthesis I	itaconate biosynthesis I	itaconate biosynthesis I	PWY-5750	itaconate biosynthesis I
Biosynthesis	Carbohydrate Biosynthesis	Itaconate Biosynthesis	itaconate biosynthesis II	itaconate biosynthesis II	itaconate biosynthesis II	itaconate biosynthesis II	itaconate biosynthesis II	PWY-8018	itaconate biosynthesis II
Biosynthesis	Carbohydrate Biosynthesis	Olefin Biosynthesis	Alkene Biosynthesis	(9Z)-tricosene biosynthesis	(9Z)-tricosene biosynthesis	(9Z)-tricosene biosynthesis	(9Z)-tricosene biosynthesis	PWY-7035	(9Z)-tricosene biosynthesis
Biosynthesis	Carbohydrate Biosynthesis	Olefin Biosynthesis	Alkene Biosynthesis	cis-alkene biosynthesis	cis-alkene biosynthesis	cis-alkene biosynthesis	cis-alkene biosynthesis	PWY-7869	cis-alkene biosynthesis
Biosynthesis	Carbohydrate Biosynthesis	Olefin Biosynthesis	Alkene Biosynthesis	terminal olefins biosynthesis I	terminal olefins biosynthesis I	terminal olefins biosynthesis I	terminal olefins biosynthesis I	PWY-7026	terminal olefins biosynthesis I
Biosynthesis	Carbohydrate Biosynthesis	Olefin Biosynthesis	Alkene Biosynthesis	terminal olefins biosynthesis II	terminal olefins biosynthesis II	terminal olefins biosynthesis II	terminal olefins biosynthesis II	PWY-7029	terminal olefins biosynthesis II
Biosynthesis	Carbohydrate Biosynthesis	Olefin Biosynthesis	hentriaconta-3,6,9,12,15,19,22,25,28-nonaene biosynthesis	hentriaconta-3,6,9,12,15,19,22,25,28-nonaene biosynthesis	hentriaconta-3,6,9,12,15,19,22,25,28-nonaene biosynthesis	hentriaconta-3,6,9,12,15,19,22,25,28-nonaene biosynthesis	hentriaconta-3,6,9,12,15,19,22,25,28-nonaene biosynthesis	PWY-7027	hentriaconta-3,6,9,12,15,19,22,25,28-nonaene biosynthesis
Biosynthesis	Carbohydrate Biosynthesis	Olefin Biosynthesis	lycopadiene biosynthesis	lycopadiene biosynthesis	lycopadiene biosynthesis	lycopadiene biosynthesis	lycopadiene biosynthesis	PWY-7943	lycopadiene biosynthesis
Biosynthesis	Carbohydrate Biosynthesis	Oligosaccharide Biosynthesis	ajugose biosynthesis I (galactinol-dependent)	ajugose biosynthesis I (galactinol-dependent)	ajugose biosynthesis I (galactinol-dependent)	ajugose biosynthesis I (galactinol-dependent)	ajugose biosynthesis I (galactinol-dependent)	PWY-5342	ajugose biosynthesis I (galactinol-dependent)
Biosynthesis	Carbohydrate Biosynthesis	Oligosaccharide Biosynthesis	ajugose biosynthesis II (galactinol-independent)	ajugose biosynthesis II (galactinol-independent)	ajugose biosynthesis II (galactinol-independent)	ajugose biosynthesis II (galactinol-independent)	ajugose biosynthesis II (galactinol-independent)	PWY-5343	ajugose biosynthesis II (galactinol-independent)
Biosynthesis	Carbohydrate Biosynthesis	Oligosaccharide Biosynthesis	lychnose and isolychnose biosynthesis	lychnose and isolychnose biosynthesis	lychnose and isolychnose biosynthesis	lychnose and isolychnose biosynthesis	lychnose and isolychnose biosynthesis	PWY-6524	lychnose and isolychnose biosynthesis
Biosynthesis	Carbohydrate Biosynthesis	Oligosaccharide Biosynthesis	mannosylfructose biosynthesis	mannosylfructose biosynthesis	mannosylfructose biosynthesis	mannosylfructose biosynthesis	mannosylfructose biosynthesis	PWY-6116	mannosylfructose biosynthesis
Biosynthesis	Carbohydrate Biosynthesis	Oligosaccharide Biosynthesis	protein N-glycosylation (bacterial)	protein N-glycosylation (bacterial)	protein N-glycosylation (bacterial)	protein N-glycosylation (bacterial)	protein N-glycosylation (bacterial)	PWY-7031	protein N-glycosylation (bacterial)
Biosynthesis	Carbohydrate Biosynthesis	Oligosaccharide Biosynthesis	protein N-glycosylation initial phase (eukaryotic)	protein N-glycosylation initial phase (eukaryotic)	protein N-glycosylation initial phase (eukaryotic)	protein N-glycosylation initial phase (eukaryotic)	protein N-glycosylation initial phase (eukaryotic)	MANNOSYL-CHITO-DOLICHOL-BIOSYNTHESIS	protein N-glycosylation initial phase (eukaryotic)
Biosynthesis	Carbohydrate Biosynthesis	Oligosaccharide Biosynthesis	protein O-glycosylation (Neisseria)	protein O-glycosylation (Neisseria)	protein O-glycosylation (Neisseria)	protein O-glycosylation (Neisseria)	protein O-glycosylation (Neisseria)	PWY-7037	protein O-glycosylation (Neisseria)
Biosynthesis	Carbohydrate Biosynthesis	Oligosaccharide Biosynthesis	stachyose biosynthesis	stachyose biosynthesis	stachyose biosynthesis	stachyose biosynthesis	stachyose biosynthesis	PWY-5337	stachyose biosynthesis
Biosynthesis	Carbohydrate Biosynthesis	Oligosaccharide Biosynthesis	stellariose and mediose biosynthesis	stellariose and mediose biosynthesis	stellariose and mediose biosynthesis	stellariose and mediose biosynthesis	stellariose and mediose biosynthesis	PWY-6525	stellariose and mediose biosynthesis
Biosynthesis	Carbohydrate Biosynthesis	Polysaccharide Biosynthesis	Alginate Biosynthesis	alginate biosynthesis I (algal)	alginate biosynthesis I (algal)	alginate biosynthesis I (algal)	alginate biosynthesis I (algal)	PWY-6073	alginate biosynthesis I (algal)
Biosynthesis	Carbohydrate Biosynthesis	Polysaccharide Biosynthesis	Alginate Biosynthesis	alginate biosynthesis II (bacterial)	alginate biosynthesis II (bacterial)	alginate biosynthesis II (bacterial)	alginate biosynthesis II (bacterial)	PWY-6082	alginate biosynthesis II (bacterial)
Biosynthesis	Carbohydrate Biosynthesis	Polysaccharide Biosynthesis	Glycogen and Starch Biosynthesis	glycogen biosynthesis I (from ADP-D-Glucose)	glycogen biosynthesis I (from ADP-D-Glucose)	glycogen biosynthesis I (from ADP-D-Glucose)	glycogen biosynthesis I (from ADP-D-Glucose)	GLYCOGENSYNTH-PWY	glycogen biosynthesis I (from ADP-D-Glucose)
Biosynthesis	Carbohydrate Biosynthesis	Polysaccharide Biosynthesis	Glycogen and Starch Biosynthesis	glycogen biosynthesis II (from UDP-D-Glucose)	glycogen biosynthesis II (from UDP-D-Glucose)	glycogen biosynthesis II (from UDP-D-Glucose)	glycogen biosynthesis II (from UDP-D-Glucose)	PWY-5067	glycogen biosynthesis II (from UDP-D-Glucose)
Biosynthesis	Carbohydrate Biosynthesis	Polysaccharide Biosynthesis	Glycogen and Starch Biosynthesis	glycogen biosynthesis III (from α-maltose 1-phosphate)	glycogen biosynthesis III (from α-maltose 1-phosphate)	glycogen biosynthesis III (from α-maltose 1-phosphate)	glycogen biosynthesis III (from α-maltose 1-phosphate)	PWY-7900	glycogen biosynthesis III (from α-maltose 1-phosphate)
Biosynthesis	Carbohydrate Biosynthesis	Polysaccharide Biosynthesis	Glycogen and Starch Biosynthesis	starch biosynthesis	starch biosynthesis	starch biosynthesis	starch biosynthesis	PWY-622	starch biosynthesis
Biosynthesis	Carbohydrate Biosynthesis	Polysaccharide Biosynthesis	Glycosaminoglycan Biosynthesis	chondroitin biosynthesis	chondroitin biosynthesis	chondroitin biosynthesis	chondroitin biosynthesis	PWY-6566	chondroitin biosynthesis
Biosynthesis	Carbohydrate Biosynthesis	Polysaccharide Biosynthesis	Glycosaminoglycan Biosynthesis	chondroitin sulfate biosynthesis	chondroitin sulfate biosynthesis	chondroitin sulfate biosynthesis	chondroitin sulfate biosynthesis	PWY-6569	chondroitin sulfate biosynthesis
Biosynthesis	Carbohydrate Biosynthesis	Polysaccharide Biosynthesis	Glycosaminoglycan Biosynthesis	chondroitin sulfate biosynthesis (late stages)	chondroitin sulfate biosynthesis (late stages)	chondroitin sulfate biosynthesis (late stages)	chondroitin sulfate biosynthesis (late stages)	PWY-6567	chondroitin sulfate biosynthesis (late stages)
Biosynthesis	Carbohydrate Biosynthesis	Polysaccharide Biosynthesis	Glycosaminoglycan Biosynthesis	dermatan sulfate biosynthesis	dermatan sulfate biosynthesis	dermatan sulfate biosynthesis	dermatan sulfate biosynthesis	PWY-6571	dermatan sulfate biosynthesis
Biosynthesis	Carbohydrate Biosynthesis	Polysaccharide Biosynthesis	Glycosaminoglycan Biosynthesis	dermatan sulfate biosynthesis (late stages)	dermatan sulfate biosynthesis (late stages)	dermatan sulfate biosynthesis (late stages)	dermatan sulfate biosynthesis (late stages)	PWY-6568	dermatan sulfate biosynthesis (late stages)
Biosynthesis	Carbohydrate Biosynthesis	Polysaccharide Biosynthesis	Glycosaminoglycan Biosynthesis	glycosaminoglycan-protein linkage region biosynthesis	glycosaminoglycan-protein linkage region biosynthesis	glycosaminoglycan-protein linkage region biosynthesis	glycosaminoglycan-protein linkage region biosynthesis	PWY-6557	glycosaminoglycan-protein linkage region biosynthesis
Biosynthesis	Carbohydrate Biosynthesis	Polysaccharide Biosynthesis	Glycosaminoglycan Biosynthesis	heparan sulfate biosynthesis	heparan sulfate biosynthesis	heparan sulfate biosynthesis	heparan sulfate biosynthesis	PWY-6564	heparan sulfate biosynthesis
Biosynthesis	Carbohydrate Biosynthesis	Polysaccharide Biosynthesis	Glycosaminoglycan Biosynthesis	heparan sulfate biosynthesis (late stages)	heparan sulfate biosynthesis (late stages)	heparan sulfate biosynthesis (late stages)	heparan sulfate biosynthesis (late stages)	PWY-6558	heparan sulfate biosynthesis (late stages)
Biosynthesis	Carbohydrate Biosynthesis	Polysaccharide Biosynthesis	1,3-β-D-glucan biosynthesis	1,3-β-D-glucan biosynthesis	1,3-β-D-glucan biosynthesis	1,3-β-D-glucan biosynthesis	1,3-β-D-glucan biosynthesis	PWY-6773	1,3-β-D-glucan biosynthesis
Biosynthesis	Carbohydrate Biosynthesis	Polysaccharide Biosynthesis	acetan biosynthesis	acetan biosynthesis	acetan biosynthesis	acetan biosynthesis	acetan biosynthesis	PWY-6658	acetan biosynthesis
Biosynthesis	Carbohydrate Biosynthesis	Polysaccharide Biosynthesis	carrageenan biosynthesis	carrageenan biosynthesis	carrageenan biosynthesis	carrageenan biosynthesis	carrageenan biosynthesis	PWY-6403	carrageenan biosynthesis
Biosynthesis	Carbohydrate Biosynthesis	Polysaccharide Biosynthesis	cellulose biosynthesis	cellulose biosynthesis	cellulose biosynthesis	cellulose biosynthesis	cellulose biosynthesis	PWY-1001	cellulose biosynthesis
Biosynthesis	Carbohydrate Biosynthesis	Polysaccharide Biosynthesis	chitin biosynthesis	chitin biosynthesis	chitin biosynthesis	chitin biosynthesis	chitin biosynthesis	PWY-6981	chitin biosynthesis
Biosynthesis	Carbohydrate Biosynthesis	Polysaccharide Biosynthesis	fructan biosynthesis	fructan biosynthesis	fructan biosynthesis	fructan biosynthesis	fructan biosynthesis	PWY-822	fructan biosynthesis
Biosynthesis	Carbohydrate Biosynthesis	Polysaccharide Biosynthesis	homogalacturonan biosynthesis	homogalacturonan biosynthesis	homogalacturonan biosynthesis	homogalacturonan biosynthesis	homogalacturonan biosynthesis	PWY-1061	homogalacturonan biosynthesis
Biosynthesis	Carbohydrate Biosynthesis	Polysaccharide Biosynthesis	xylogalacturonan biosynthesis	xylogalacturonan biosynthesis	xylogalacturonan biosynthesis	xylogalacturonan biosynthesis	xylogalacturonan biosynthesis	PWY-5980	xylogalacturonan biosynthesis
Biosynthesis	Carbohydrate Biosynthesis	Polysaccharide Biosynthesis	xyloglucan biosynthesis	xyloglucan biosynthesis	xyloglucan biosynthesis	xyloglucan biosynthesis	xyloglucan biosynthesis	PWY-5936	xyloglucan biosynthesis
Biosynthesis	Carbohydrate Biosynthesis	Sugar Biosynthesis	Gluconeogenesis	gluconeogenesis I	gluconeogenesis I	gluconeogenesis I	gluconeogenesis I	GLUCONEO-PWY	gluconeogenesis I
Biosynthesis	Carbohydrate Biosynthesis	Sugar Biosynthesis	Gluconeogenesis	gluconeogenesis II (Methanobacterium thermoautotrophicum)	gluconeogenesis II (Methanobacterium thermoautotrophicum)	gluconeogenesis II (Methanobacterium thermoautotrophicum)	gluconeogenesis II (Methanobacterium thermoautotrophicum)	PWY-6142	gluconeogenesis II (Methanobacterium thermoautotrophicum)
Biosynthesis	Carbohydrate Biosynthesis	Sugar Biosynthesis	Gluconeogenesis	gluconeogenesis III	gluconeogenesis III	gluconeogenesis III	gluconeogenesis III	PWY66-399	gluconeogenesis III
Biosynthesis	Carbohydrate Biosynthesis	Sugar Biosynthesis	Sucrose Biosynthesis	sucrose biosynthesis I (from photosynthesis)	sucrose biosynthesis I (from photosynthesis)	sucrose biosynthesis I (from photosynthesis)	sucrose biosynthesis I (from photosynthesis)	SUCSYN-PWY	sucrose biosynthesis I (from photosynthesis)
Biosynthesis	Carbohydrate Biosynthesis	Sugar Biosynthesis	Sucrose Biosynthesis	sucrose biosynthesis II	sucrose biosynthesis II	sucrose biosynthesis II	sucrose biosynthesis II	PWY-7238	sucrose biosynthesis II
Biosynthesis	Carbohydrate Biosynthesis	Sugar Biosynthesis	Sucrose Biosynthesis	sucrose biosynthesis III	sucrose biosynthesis III	sucrose biosynthesis III	sucrose biosynthesis III	PWY-7347	sucrose biosynthesis III
Biosynthesis	Carbohydrate Biosynthesis	Sugar Biosynthesis	Sugar Nucleotide Biosynthesis	ADP-sugar Biosynthesis	ADP-L-glycero-β-D-manno-heptose biosynthesis	ADP-L-glycero-β-D-manno-heptose biosynthesis	ADP-L-glycero-β-D-manno-heptose biosynthesis	PWY0-1241	ADP-L-glycero-β-D-manno-heptose biosynthesis
Biosynthesis	Carbohydrate Biosynthesis	Sugar Biosynthesis	Sugar Nucleotide Biosynthesis	CDP-sugar Biosynthesis	CDP-4-dehydro-3,6-dideoxy-D-glucose biosynthesis	CDP-4-dehydro-3,6-dideoxy-D-glucose biosynthesis	CDP-4-dehydro-3,6-dideoxy-D-glucose biosynthesis	PWY-5833	CDP-4-dehydro-3,6-dideoxy-D-glucose biosynthesis
Biosynthesis	Carbohydrate Biosynthesis	Sugar Biosynthesis	Sugar Nucleotide Biosynthesis	CDP-sugar Biosynthesis	CDP-abequose biosynthesis	CDP-abequose biosynthesis	CDP-abequose biosynthesis	PWY-5831	CDP-abequose biosynthesis
Biosynthesis	Carbohydrate Biosynthesis	Sugar Biosynthesis	Sugar Nucleotide Biosynthesis	CDP-sugar Biosynthesis	CDP-ascarylose biosynthesis	CDP-ascarylose biosynthesis	CDP-ascarylose biosynthesis	PWY-5830	CDP-ascarylose biosynthesis
Biosynthesis	Carbohydrate Biosynthesis	Sugar Biosynthesis	Sugar Nucleotide Biosynthesis	CDP-sugar Biosynthesis	CDP-D-arabitol biosynthesis	CDP-D-arabitol biosynthesis	CDP-D-arabitol biosynthesis	PWY-6998	CDP-D-arabitol biosynthesis
Biosynthesis	Carbohydrate Biosynthesis	Sugar Biosynthesis	Sugar Nucleotide Biosynthesis	CDP-sugar Biosynthesis	CDP-D-mannitol biosynthesis	CDP-D-mannitol biosynthesis	CDP-D-mannitol biosynthesis	PWY-7127	CDP-D-mannitol biosynthesis
Biosynthesis	Carbohydrate Biosynthesis	Sugar Biosynthesis	Sugar Nucleotide Biosynthesis	CDP-sugar Biosynthesis	CDP-paratose biosynthesis	CDP-paratose biosynthesis	CDP-paratose biosynthesis	PWY-5832	CDP-paratose biosynthesis
Biosynthesis	Carbohydrate Biosynthesis	Sugar Biosynthesis	Sugar Nucleotide Biosynthesis	CDP-sugar Biosynthesis	CDP-tyvelose biosynthesis	CDP-tyvelose biosynthesis	CDP-tyvelose biosynthesis	PWY-5834	CDP-tyvelose biosynthesis
Biosynthesis	Carbohydrate Biosynthesis	Sugar Biosynthesis	Sugar Nucleotide Biosynthesis	CDP-sugar Biosynthesis	superpathway of CDP-glucose-derived O-antigen building blocks biosynthesis	superpathway of CDP-glucose-derived O-antigen building blocks biosynthesis	superpathway of CDP-glucose-derived O-antigen building blocks biosynthesis	PWY-5823	superpathway of CDP-glucose-derived O-antigen building blocks biosynthesis
Biosynthesis	Carbohydrate Biosynthesis	Sugar Biosynthesis	Sugar Nucleotide Biosynthesis	CMP-sugar Biosynthesis	CMP-3-deoxy-D-manno-octulosonate Biosynthesis	CMP-3-deoxy-D-manno-octulosonate biosynthesis	CMP-3-deoxy-D-manno-octulosonate biosynthesis	PWY-1269	CMP-3-deoxy-D-manno-octulosonate biosynthesis
Biosynthesis	Carbohydrate Biosynthesis	Sugar Biosynthesis	Sugar Nucleotide Biosynthesis	CMP-sugar Biosynthesis	CMP-3-deoxy-D-manno-octulosonate Biosynthesis	CMP-8-amino-3,8-dideoxy-D-manno-octulosonate biosynthesis	CMP-8-amino-3,8-dideoxy-D-manno-octulosonate biosynthesis	PWY-7674	CMP-8-amino-3,8-dideoxy-D-manno-octulosonate biosynthesis
Biosynthesis	Carbohydrate Biosynthesis	Sugar Biosynthesis	Sugar Nucleotide Biosynthesis	CMP-sugar Biosynthesis	CMP-N-acetylneuraminate Biosynthesis	CMP-N-acetylneuraminate biosynthesis I (eukaryotes)	CMP-N-acetylneuraminate biosynthesis I (eukaryotes)	PWY-6138	CMP-N-acetylneuraminate biosynthesis I (eukaryotes)
Biosynthesis	Carbohydrate Biosynthesis	Sugar Biosynthesis	Sugar Nucleotide Biosynthesis	CMP-sugar Biosynthesis	CMP-N-acetylneuraminate Biosynthesis	CMP-N-acetylneuraminate biosynthesis II (bacteria)	CMP-N-acetylneuraminate biosynthesis II (bacteria)	PWY-6139	CMP-N-acetylneuraminate biosynthesis II (bacteria)
Biosynthesis	Carbohydrate Biosynthesis	Sugar Biosynthesis	Sugar Nucleotide Biosynthesis	CMP-sugar Biosynthesis	CMP-legionaminate biosynthesis	CMP-legionaminate biosynthesis I	CMP-legionaminate biosynthesis I	PWY-6749	CMP-legionaminate biosynthesis I
Biosynthesis	Carbohydrate Biosynthesis	Sugar Biosynthesis	Sugar Nucleotide Biosynthesis	CMP-sugar Biosynthesis	CMP-legionaminate biosynthesis	CMP-legionaminate biosynthesis II	CMP-legionaminate biosynthesis II	PWY-7131	CMP-legionaminate biosynthesis II
Biosynthesis	Carbohydrate Biosynthesis	Sugar Biosynthesis	Sugar Nucleotide Biosynthesis	CMP-sugar Biosynthesis	CMP-2-keto-3-deoxy-D-glycero-D-galacto-nononate biosynthesis	CMP-2-keto-3-deoxy-D-glycero-D-galacto-nononate biosynthesis	CMP-2-keto-3-deoxy-D-glycero-D-galacto-nononate biosynthesis	PWY-6140	CMP-2-keto-3-deoxy-D-glycero-D-galacto-nononate biosynthesis
Biosynthesis	Carbohydrate Biosynthesis	Sugar Biosynthesis	Sugar Nucleotide Biosynthesis	CMP-sugar Biosynthesis	CMP-8-amino-3,8-dideoxy-D-manno-octulosonate biosynthesis	CMP-8-amino-3,8-dideoxy-D-manno-octulosonate biosynthesis	CMP-8-amino-3,8-dideoxy-D-manno-octulosonate biosynthesis	PWY-7674	CMP-8-amino-3,8-dideoxy-D-manno-octulosonate biosynthesis
Biosynthesis	Carbohydrate Biosynthesis	Sugar Biosynthesis	Sugar Nucleotide Biosynthesis	CMP-sugar Biosynthesis	CMP-N-acetyl-7-O-acetylneuraminate biosynthesis	CMP-N-acetyl-7-O-acetylneuraminate biosynthesis	CMP-N-acetyl-7-O-acetylneuraminate biosynthesis	PWY-7529	CMP-N-acetyl-7-O-acetylneuraminate biosynthesis
Biosynthesis	Carbohydrate Biosynthesis	Sugar Biosynthesis	Sugar Nucleotide Biosynthesis	CMP-sugar Biosynthesis	CMP-N-glycoloylneuraminate biosynthesis	CMP-N-glycoloylneuraminate biosynthesis	CMP-N-glycoloylneuraminate biosynthesis	PWY-6144	CMP-N-glycoloylneuraminate biosynthesis
Biosynthesis	Carbohydrate Biosynthesis	Sugar Biosynthesis	Sugar Nucleotide Biosynthesis	CMP-sugar Biosynthesis	CMP-diacetamido-8-epilegionaminic acid biosynthesis	CMP-diacetamido-8-epilegionaminic acid biosynthesis	CMP-diacetamido-8-epilegionaminic acid biosynthesis	PWY-7719	CMP-diacetamido-8-epilegionaminic acid biosynthesis
Biosynthesis	Carbohydrate Biosynthesis	Sugar Biosynthesis	Sugar Nucleotide Biosynthesis	CMP-sugar Biosynthesis	CMP-pseudaminate biosynthesis	CMP-pseudaminate biosynthesis	CMP-pseudaminate biosynthesis	PWY-6143	CMP-pseudaminate biosynthesis
Biosynthesis	Carbohydrate Biosynthesis	Sugar Biosynthesis	Sugar Nucleotide Biosynthesis	CMP-sugar Biosynthesis	superpathway of CMP-sialic acids biosynthesis	superpathway of CMP-sialic acids biosynthesis	superpathway of CMP-sialic acids biosynthesis	PWY-6145	superpathway of CMP-sialic acids biosynthesis
Biosynthesis	Carbohydrate Biosynthesis	Sugar Biosynthesis	Sugar Nucleotide Biosynthesis	dTDP-sugar Biosynthesis	dTDP-α-D-mycaminose biosynthesis	dTDP-α-D-mycaminose biosynthesis	dTDP-α-D-mycaminose biosynthesis	PWY-7414	dTDP-α-D-mycaminose biosynthesis
Biosynthesis	Carbohydrate Biosynthesis	Sugar Biosynthesis	Sugar Nucleotide Biosynthesis	dTDP-sugar Biosynthesis	dTDP-β-L-4-epi-vancosamine biosynthesis	dTDP-β-L-4-epi-vancosamine biosynthesis	dTDP-β-L-4-epi-vancosamine biosynthesis	PWY-7440	dTDP-β-L-4-epi-vancosamine biosynthesis
Biosynthesis	Carbohydrate Biosynthesis	Sugar Biosynthesis	Sugar Nucleotide Biosynthesis	dTDP-sugar Biosynthesis	dTDP-β-L-digitoxose biosynthesis	dTDP-β-L-digitoxose biosynthesis	dTDP-β-L-digitoxose biosynthesis	PWY-7657	dTDP-β-L-digitoxose biosynthesis
Biosynthesis	Carbohydrate Biosynthesis	Sugar Biosynthesis	Sugar Nucleotide Biosynthesis	dTDP-sugar Biosynthesis	dTDP-β-L-evernitrose biosynthesis	dTDP-β-L-evernitrose biosynthesis	dTDP-β-L-evernitrose biosynthesis	PWY-7439	dTDP-β-L-evernitrose biosynthesis
Biosynthesis	Carbohydrate Biosynthesis	Sugar Biosynthesis	Sugar Nucleotide Biosynthesis	dTDP-sugar Biosynthesis	dTDP-3-acetamido-α-D-fucose biosynthesis	dTDP-3-acetamido-α-D-fucose biosynthesis	dTDP-3-acetamido-α-D-fucose biosynthesis	PWY-6953	dTDP-3-acetamido-α-D-fucose biosynthesis
Biosynthesis	Carbohydrate Biosynthesis	Sugar Biosynthesis	Sugar Nucleotide Biosynthesis	dTDP-sugar Biosynthesis	dTDP-3-acetamido-3,6-dideoxy-α-D-glucose biosynthesis	dTDP-3-acetamido-3,6-dideoxy-α-D-glucose biosynthesis	dTDP-3-acetamido-3,6-dideoxy-α-D-glucose biosynthesis	PWY-7318	dTDP-3-acetamido-3,6-dideoxy-α-D-glucose biosynthesis
Biosynthesis	Carbohydrate Biosynthesis	Sugar Biosynthesis	Sugar Nucleotide Biosynthesis	dTDP-sugar Biosynthesis	dTDP-4-O-demethyl-β-L-noviose biosynthesis	dTDP-4-O-demethyl-β-L-noviose biosynthesis	dTDP-4-O-demethyl-β-L-noviose biosynthesis	PWY-7301	dTDP-4-O-demethyl-β-L-noviose biosynthesis
Biosynthesis	Carbohydrate Biosynthesis	Sugar Biosynthesis	Sugar Nucleotide Biosynthesis	dTDP-sugar Biosynthesis	dTDP-6-deoxy-α-D-allose biosynthesis	dTDP-6-deoxy-α-D-allose biosynthesis	dTDP-6-deoxy-α-D-allose biosynthesis	PWY-7413	dTDP-6-deoxy-α-D-allose biosynthesis
Biosynthesis	Carbohydrate Biosynthesis	Sugar Biosynthesis	Sugar Nucleotide Biosynthesis	dTDP-sugar Biosynthesis	dTDP-N-acetylthomosamine biosynthesis	dTDP-N-acetylthomosamine biosynthesis	dTDP-N-acetylthomosamine biosynthesis	PWY-7315	dTDP-N-acetylthomosamine biosynthesis
Biosynthesis	Carbohydrate Biosynthesis	Sugar Biosynthesis	Sugar Nucleotide Biosynthesis	dTDP-sugar Biosynthesis	dTDP-N-acetylviosamine biosynthesis	dTDP-N-acetylviosamine biosynthesis	dTDP-N-acetylviosamine biosynthesis	PWY-7316	dTDP-N-acetylviosamine biosynthesis
Biosynthesis	Carbohydrate Biosynthesis	Sugar Biosynthesis	Sugar Nucleotide Biosynthesis	dTDP-sugar Biosynthesis	dTDP-D-β-fucofuranose biosynthesis	dTDP-D-β-fucofuranose biosynthesis	dTDP-D-β-fucofuranose biosynthesis	PWY-7312	dTDP-D-β-fucofuranose biosynthesis
Biosynthesis	Carbohydrate Biosynthesis	Sugar Biosynthesis	Sugar Nucleotide Biosynthesis	dTDP-sugar Biosynthesis	dTDP-D-desosamine biosynthesis	dTDP-D-desosamine biosynthesis	dTDP-D-desosamine biosynthesis	PWY-6942	dTDP-D-desosamine biosynthesis
Biosynthesis	Carbohydrate Biosynthesis	Sugar Biosynthesis	Sugar Nucleotide Biosynthesis	dTDP-sugar Biosynthesis	dTDP-D-olivose, dTDP-D-oliose and dTDP-D-mycarose biosynthesis	dTDP-D-olivose, dTDP-D-oliose and dTDP-D-mycarose biosynthesis	dTDP-D-olivose, dTDP-D-oliose and dTDP-D-mycarose biosynthesis	PWY-6973	dTDP-D-olivose, dTDP-D-oliose and dTDP-D-mycarose biosynthesis
Biosynthesis	Carbohydrate Biosynthesis	Sugar Biosynthesis	Sugar Nucleotide Biosynthesis	dTDP-sugar Biosynthesis	dTDP-D-ravidosamine and dTDP-4-acetyl-D-ravidosamine biosynthesis	dTDP-D-ravidosamine and dTDP-4-acetyl-D-ravidosamine biosynthesis	dTDP-D-ravidosamine and dTDP-4-acetyl-D-ravidosamine biosynthesis	PWY-7688	dTDP-D-ravidosamine and dTDP-4-acetyl-D-ravidosamine biosynthesis
Biosynthesis	Carbohydrate Biosynthesis	Sugar Biosynthesis	Sugar Nucleotide Biosynthesis	dTDP-sugar Biosynthesis	dTDP-L-daunosamine biosynthesis	dTDP-L-daunosamine biosynthesis	dTDP-L-daunosamine biosynthesis	PWY-7814	dTDP-L-daunosamine biosynthesis
Biosynthesis	Carbohydrate Biosynthesis	Sugar Biosynthesis	Sugar Nucleotide Biosynthesis	dTDP-sugar Biosynthesis	dTDP-L-megosamine biosynthesis	dTDP-L-megosamine biosynthesis	dTDP-L-megosamine biosynthesis	PWY-7104	dTDP-L-megosamine biosynthesis
Biosynthesis	Carbohydrate Biosynthesis	Sugar Biosynthesis	Sugar Nucleotide Biosynthesis	dTDP-sugar Biosynthesis	dTDP-L-mycarose biosynthesis	dTDP-L-mycarose biosynthesis	dTDP-L-mycarose biosynthesis	PWY-6976	dTDP-L-mycarose biosynthesis
Biosynthesis	Carbohydrate Biosynthesis	Sugar Biosynthesis	Sugar Nucleotide Biosynthesis	dTDP-sugar Biosynthesis	dTDP-L-olivose biosynthesis	dTDP-L-olivose biosynthesis	dTDP-L-olivose biosynthesis	PWY-6974	dTDP-L-olivose biosynthesis
Biosynthesis	Carbohydrate Biosynthesis	Sugar Biosynthesis	Sugar Nucleotide Biosynthesis	dTDP-sugar Biosynthesis	dTDP-L-rhamnose biosynthesis	dTDP-L-rhamnose biosynthesis	dTDP-L-rhamnose biosynthesis	DTDPRHAMSYN-PWY	dTDP-L-rhamnose biosynthesis
Biosynthesis	Carbohydrate Biosynthesis	Sugar Biosynthesis	Sugar Nucleotide Biosynthesis	dTDP-sugar Biosynthesis	superpathway of dTDP-glucose-derived antibiotic building blocks biosynthesis	superpathway of dTDP-glucose-derived antibiotic building blocks biosynthesis	superpathway of dTDP-glucose-derived antibiotic building blocks biosynthesis	PWY-7438	superpathway of dTDP-glucose-derived antibiotic building blocks biosynthesis
Biosynthesis	Carbohydrate Biosynthesis	Sugar Biosynthesis	Sugar Nucleotide Biosynthesis	dTDP-sugar Biosynthesis	superpathway of dTDP-glucose-derived O-antigen building blocks biosynthesis	superpathway of dTDP-glucose-derived O-antigen building blocks biosynthesis	superpathway of dTDP-glucose-derived O-antigen building blocks biosynthesis	PWY-7317	superpathway of dTDP-glucose-derived O-antigen building blocks biosynthesis
Biosynthesis	Carbohydrate Biosynthesis	Sugar Biosynthesis	Sugar Nucleotide Biosynthesis	GDP-sugar Biosynthesis	GDP-6-deoxy-D-altro-heptose biosynthesis	GDP-6-deoxy-D-altro-heptose biosynthesis	GDP-6-deoxy-D-altro-heptose biosynthesis	PWY-7610	GDP-6-deoxy-D-altro-heptose biosynthesis
Biosynthesis	Carbohydrate Biosynthesis	Sugar Biosynthesis	Sugar Nucleotide Biosynthesis	GDP-sugar Biosynthesis	GDP-6-deoxy-D-manno-heptose biosynthesis	GDP-6-deoxy-D-manno-heptose biosynthesis	GDP-6-deoxy-D-manno-heptose biosynthesis	PWY-7613	GDP-6-deoxy-D-manno-heptose biosynthesis
Biosynthesis	Carbohydrate Biosynthesis	Sugar Biosynthesis	Sugar Nucleotide Biosynthesis	GDP-sugar Biosynthesis	GDP-6-deoxy-D-talose biosynthesis	GDP-6-deoxy-D-talose biosynthesis	GDP-6-deoxy-D-talose biosynthesis	PWY-5738	GDP-6-deoxy-D-talose biosynthesis
Biosynthesis	Carbohydrate Biosynthesis	Sugar Biosynthesis	Sugar Nucleotide Biosynthesis	GDP-sugar Biosynthesis	GDP-D-glycero-α-D-manno-heptose biosynthesis	GDP-D-glycero-α-D-manno-heptose biosynthesis	GDP-D-glycero-α-D-manno-heptose biosynthesis	PWY-6478	GDP-D-glycero-α-D-manno-heptose biosynthesis
Biosynthesis	Carbohydrate Biosynthesis	Sugar Biosynthesis	Sugar Nucleotide Biosynthesis	GDP-sugar Biosynthesis	GDP-D-perosamine biosynthesis	GDP-D-perosamine biosynthesis	GDP-D-perosamine biosynthesis	PWY-5739	GDP-D-perosamine biosynthesis
Biosynthesis	Carbohydrate Biosynthesis	Sugar Biosynthesis	Sugar Nucleotide Biosynthesis	GDP-sugar Biosynthesis	GDP-D-rhamnose biosynthesis	GDP-D-rhamnose biosynthesis	GDP-D-rhamnose biosynthesis	GDPRHAMSYN-PWY	GDP-D-rhamnose biosynthesis
Biosynthesis	Carbohydrate Biosynthesis	Sugar Biosynthesis	Sugar Nucleotide Biosynthesis	GDP-sugar Biosynthesis	GDP-glucose biosynthesis	GDP-glucose biosynthesis	GDP-glucose biosynthesis	PWY-5661	GDP-glucose biosynthesis
Biosynthesis	Carbohydrate Biosynthesis	Sugar Biosynthesis	Sugar Nucleotide Biosynthesis	GDP-sugar Biosynthesis	GDP-L-colitose biosynthesis	GDP-L-colitose biosynthesis	GDP-L-colitose biosynthesis	PWY-5740	GDP-L-colitose biosynthesis
Biosynthesis	Carbohydrate Biosynthesis	Sugar Biosynthesis	Sugar Nucleotide Biosynthesis	GDP-sugar Biosynthesis	GDP-L-fucose biosynthesis I (from GDP-D-mannose)	GDP-L-fucose biosynthesis I (from GDP-D-mannose)	GDP-L-fucose biosynthesis I (from GDP-D-mannose)	PWY-66	GDP-L-fucose biosynthesis I (from GDP-D-mannose)
Biosynthesis	Carbohydrate Biosynthesis	Sugar Biosynthesis	Sugar Nucleotide Biosynthesis	GDP-sugar Biosynthesis	GDP-L-fucose biosynthesis II (from L-fucose)	GDP-L-fucose biosynthesis II (from L-fucose)	GDP-L-fucose biosynthesis II (from L-fucose)	PWY-6	GDP-L-fucose biosynthesis II (from L-fucose)
Biosynthesis	Carbohydrate Biosynthesis	Sugar Biosynthesis	Sugar Nucleotide Biosynthesis	GDP-sugar Biosynthesis	GDP-L-galactose biosynthesis	GDP-L-galactose biosynthesis	GDP-L-galactose biosynthesis	PWY-5115	GDP-L-galactose biosynthesis
Biosynthesis	Carbohydrate Biosynthesis	Sugar Biosynthesis	Sugar Nucleotide Biosynthesis	GDP-sugar Biosynthesis	GDP-mannose biosynthesis	GDP-mannose biosynthesis	GDP-mannose biosynthesis	PWY-5659	GDP-mannose biosynthesis
Biosynthesis	Carbohydrate Biosynthesis	Sugar Biosynthesis	Sugar Nucleotide Biosynthesis	GDP-sugar Biosynthesis	GDP-mycosamine biosynthesis	GDP-mycosamine biosynthesis	GDP-mycosamine biosynthesis	PWY-7573	GDP-mycosamine biosynthesis
Biosynthesis	Carbohydrate Biosynthesis	Sugar Biosynthesis	Sugar Nucleotide Biosynthesis	GDP-sugar Biosynthesis	superpathway of GDP-mannose-derived O-antigen building blocks biosynthesis	superpathway of GDP-mannose-derived O-antigen building blocks biosynthesis	superpathway of GDP-mannose-derived O-antigen building blocks biosynthesis	PWY-7323	superpathway of GDP-mannose-derived O-antigen building blocks biosynthesis
Biosynthesis	Carbohydrate Biosynthesis	Sugar Biosynthesis	Sugar Nucleotide Biosynthesis	UDP-sugar Biosynthesis	UDP-N-acetyl-D-galactosamine Biosynthesis	UDP-N-acetyl-D-galactosamine biosynthesis I	UDP-N-acetyl-D-galactosamine biosynthesis I	PWY-5512	UDP-N-acetyl-D-galactosamine biosynthesis I
Biosynthesis	Carbohydrate Biosynthesis	Sugar Biosynthesis	Sugar Nucleotide Biosynthesis	UDP-sugar Biosynthesis	UDP-N-acetyl-D-galactosamine Biosynthesis	UDP-N-acetyl-D-galactosamine biosynthesis II	UDP-N-acetyl-D-galactosamine biosynthesis II	PWY-5514	UDP-N-acetyl-D-galactosamine biosynthesis II
Biosynthesis	Carbohydrate Biosynthesis	Sugar Biosynthesis	Sugar Nucleotide Biosynthesis	UDP-sugar Biosynthesis	UDP-N-acetyl-D-galactosamine Biosynthesis	UDP-N-acetyl-D-galactosamine biosynthesis III	UDP-N-acetyl-D-galactosamine biosynthesis III	PWY-8013	UDP-N-acetyl-D-galactosamine biosynthesis III
Biosynthesis	Carbohydrate Biosynthesis	Sugar Biosynthesis	Sugar Nucleotide Biosynthesis	UDP-sugar Biosynthesis	UDP-N-acetyl-D-glucosamine Biosynthesis	UDP-N-acetyl-D-glucosamine biosynthesis I	UDP-N-acetyl-D-glucosamine biosynthesis I	UDPNAGSYN-PWY	UDP-N-acetyl-D-glucosamine biosynthesis I
Biosynthesis	Carbohydrate Biosynthesis	Sugar Biosynthesis	Sugar Nucleotide Biosynthesis	UDP-sugar Biosynthesis	UDP-N-acetyl-D-glucosamine Biosynthesis	UDP-N-acetyl-D-glucosamine biosynthesis II	UDP-N-acetyl-D-glucosamine biosynthesis II	UDPNACETYLGALSYN-PWY	UDP-N-acetyl-D-glucosamine biosynthesis II
Biosynthesis	Carbohydrate Biosynthesis	Sugar Biosynthesis	Sugar Nucleotide Biosynthesis	UDP-sugar Biosynthesis	superpathway of UDP-N-acetylglucosamine-derived O-antigen building blocks biosynthesis	superpathway of UDP-N-acetylglucosamine-derived O-antigen building blocks biosynthesis	superpathway of UDP-N-acetylglucosamine-derived O-antigen building blocks biosynthesis	PWY-7332	superpathway of UDP-N-acetylglucosamine-derived O-antigen building blocks biosynthesis
Biosynthesis	Carbohydrate Biosynthesis	Sugar Biosynthesis	Sugar Nucleotide Biosynthesis	UDP-sugar Biosynthesis	superpathway of UDP-glucose-derived O-antigen building blocks biosynthesis	superpathway of UDP-glucose-derived O-antigen building blocks biosynthesis	superpathway of UDP-glucose-derived O-antigen building blocks biosynthesis	PWY-7328	superpathway of UDP-glucose-derived O-antigen building blocks biosynthesis
Biosynthesis	Carbohydrate Biosynthesis	Sugar Biosynthesis	Sugar Nucleotide Biosynthesis	UDP-sugar Biosynthesis	UDP-α-D-galactofuranose biosynthesis	UDP-α-D-galactofuranose biosynthesis	UDP-α-D-galactofuranose biosynthesis	PWY-7622	UDP-α-D-galactofuranose biosynthesis
Biosynthesis	Carbohydrate Biosynthesis	Sugar Biosynthesis	Sugar Nucleotide Biosynthesis	UDP-sugar Biosynthesis	UDP-α-D-galactose biosynthesis	UDP-α-D-galactose biosynthesis	UDP-α-D-galactose biosynthesis	PWY-7344	UDP-α-D-galactose biosynthesis
Biosynthesis	Carbohydrate Biosynthesis	Sugar Biosynthesis	Sugar Nucleotide Biosynthesis	UDP-sugar Biosynthesis	UDP-α-D-galacturonate biosynthesis I (from UDP-D-glucuronate)	UDP-α-D-galacturonate biosynthesis I (from UDP-D-glucuronate)	UDP-α-D-galacturonate biosynthesis I (from UDP-D-glucuronate)	PWY-4861	UDP-α-D-galacturonate biosynthesis I (from UDP-D-glucuronate)
Biosynthesis	Carbohydrate Biosynthesis	Sugar Biosynthesis	Sugar Nucleotide Biosynthesis	UDP-sugar Biosynthesis	UDP-α-D-galacturonate biosynthesis II (from D-galacturonate)	UDP-α-D-galacturonate biosynthesis II (from D-galacturonate)	UDP-α-D-galacturonate biosynthesis II (from D-galacturonate)	PWY-4	UDP-α-D-galacturonate biosynthesis II (from D-galacturonate)
Biosynthesis	Carbohydrate Biosynthesis	Sugar Biosynthesis	Sugar Nucleotide Biosynthesis	UDP-sugar Biosynthesis	UDP-α-D-glucose biosynthesis I	UDP-α-D-glucose biosynthesis I	UDP-α-D-glucose biosynthesis I	PWY-7343	UDP-α-D-glucose biosynthesis I
Biosynthesis	Carbohydrate Biosynthesis	Sugar Biosynthesis	Sugar Nucleotide Biosynthesis	UDP-sugar Biosynthesis	UDP-α-D-glucuronate biosynthesis (from myo-inositol)	UDP-α-D-glucuronate biosynthesis (from myo-inositol)	UDP-α-D-glucuronate biosynthesis (from myo-inositol)	PWY-4841	UDP-α-D-glucuronate biosynthesis (from myo-inositol)
Biosynthesis	Carbohydrate Biosynthesis	Sugar Biosynthesis	Sugar Nucleotide Biosynthesis	UDP-sugar Biosynthesis	UDP-α-D-glucuronate biosynthesis (from UDP-glucose)	UDP-α-D-glucuronate biosynthesis (from UDP-glucose)	UDP-α-D-glucuronate biosynthesis (from UDP-glucose)	PWY-7346	UDP-α-D-glucuronate biosynthesis (from UDP-glucose)
Biosynthesis	Carbohydrate Biosynthesis	Sugar Biosynthesis	Sugar Nucleotide Biosynthesis	UDP-sugar Biosynthesis	UDP-α-D-xylose biosynthesis	UDP-α-D-xylose biosynthesis	UDP-α-D-xylose biosynthesis	PWY-4821	UDP-α-D-xylose biosynthesis
Biosynthesis	Carbohydrate Biosynthesis	Sugar Biosynthesis	Sugar Nucleotide Biosynthesis	UDP-sugar Biosynthesis	UDP-β-L-arabinose biosynthesis I (from UDP-α-D-xylose)	UDP-β-L-arabinose biosynthesis I (from UDP-α-D-xylose)	UDP-β-L-arabinose biosynthesis I (from UDP-α-D-xylose)	PWY-63	UDP-β-L-arabinose biosynthesis I (from UDP-α-D-xylose)
Biosynthesis	Carbohydrate Biosynthesis	Sugar Biosynthesis	Sugar Nucleotide Biosynthesis	UDP-sugar Biosynthesis	UDP-β-L-arabinose biosynthesis II (from β-L-arabinose)	UDP-β-L-arabinose biosynthesis II (from β-L-arabinose)	UDP-β-L-arabinose biosynthesis II (from β-L-arabinose)	PWY-82	UDP-β-L-arabinose biosynthesis II (from β-L-arabinose)
Biosynthesis	Carbohydrate Biosynthesis	Sugar Biosynthesis	Sugar Nucleotide Biosynthesis	UDP-sugar Biosynthesis	UDP-β-L-rhamnose biosynthesis	UDP-β-L-rhamnose biosynthesis	UDP-β-L-rhamnose biosynthesis	PWY-3261	UDP-β-L-rhamnose biosynthesis
Biosynthesis	Carbohydrate Biosynthesis	Sugar Biosynthesis	Sugar Nucleotide Biosynthesis	UDP-sugar Biosynthesis	UDP-2,3-diacetamido-2,3-dideoxy-α-D-mannuronate biosynthesis	UDP-2,3-diacetamido-2,3-dideoxy-α-D-mannuronate biosynthesis	UDP-2,3-diacetamido-2,3-dideoxy-α-D-mannuronate biosynthesis	PWY-7090	UDP-2,3-diacetamido-2,3-dideoxy-α-D-mannuronate biosynthesis
Biosynthesis	Carbohydrate Biosynthesis	Sugar Biosynthesis	Sugar Nucleotide Biosynthesis	UDP-sugar Biosynthesis	UDP-N,N'-diacetylbacillosamine biosynthesis	UDP-N,N'-diacetylbacillosamine biosynthesis	UDP-N,N'-diacetylbacillosamine biosynthesis	PWY-7028	UDP-N,N'-diacetylbacillosamine biosynthesis
Biosynthesis	Carbohydrate Biosynthesis	Sugar Biosynthesis	Sugar Nucleotide Biosynthesis	UDP-sugar Biosynthesis	UDP-N-acetyl-α-D-fucosamine biosynthesis	UDP-N-acetyl-α-D-fucosamine biosynthesis	UDP-N-acetyl-α-D-fucosamine biosynthesis	PWY-7333	UDP-N-acetyl-α-D-fucosamine biosynthesis
Biosynthesis	Carbohydrate Biosynthesis	Sugar Biosynthesis	Sugar Nucleotide Biosynthesis	UDP-sugar Biosynthesis	UDP-N-acetyl-α-D-galactosaminuronate biosynthesis	UDP-N-acetyl-α-D-galactosaminuronate biosynthesis	UDP-N-acetyl-α-D-galactosaminuronate biosynthesis	PWY-7336	UDP-N-acetyl-α-D-galactosaminuronate biosynthesis
Biosynthesis	Carbohydrate Biosynthesis	Sugar Biosynthesis	Sugar Nucleotide Biosynthesis	UDP-sugar Biosynthesis	UDP-N-acetyl-α-D-mannosaminouronate biosynthesis	UDP-N-acetyl-α-D-mannosaminouronate biosynthesis	UDP-N-acetyl-α-D-mannosaminouronate biosynthesis	PWY-7335	UDP-N-acetyl-α-D-mannosaminouronate biosynthesis
Biosynthesis	Carbohydrate Biosynthesis	Sugar Biosynthesis	Sugar Nucleotide Biosynthesis	UDP-sugar Biosynthesis	UDP-N-acetyl-α-D-quinovosamine biosynthesis	UDP-N-acetyl-α-D-quinovosamine biosynthesis	UDP-N-acetyl-α-D-quinovosamine biosynthesis	PWY-7334	UDP-N-acetyl-α-D-quinovosamine biosynthesis
Biosynthesis	Carbohydrate Biosynthesis	Sugar Biosynthesis	Sugar Nucleotide Biosynthesis	UDP-sugar Biosynthesis	UDP-N-acetyl-β-L-fucosamine biosynthesis	UDP-N-acetyl-β-L-fucosamine biosynthesis	UDP-N-acetyl-β-L-fucosamine biosynthesis	PWY-7330	UDP-N-acetyl-β-L-fucosamine biosynthesis
Biosynthesis	Carbohydrate Biosynthesis	Sugar Biosynthesis	Sugar Nucleotide Biosynthesis	UDP-sugar Biosynthesis	UDP-N-acetyl-β-L-quinovosamine biosynthesis	UDP-N-acetyl-β-L-quinovosamine biosynthesis	UDP-N-acetyl-β-L-quinovosamine biosynthesis	PWY-7331	UDP-N-acetyl-β-L-quinovosamine biosynthesis
Biosynthesis	Carbohydrate Biosynthesis	Sugar Biosynthesis	Sugar Nucleotide Biosynthesis	UDP-sugar Biosynthesis	UDP-D-apiose biosynthesis (from UDP-D-glucuronate)	UDP-D-apiose biosynthesis (from UDP-D-glucuronate)	UDP-D-apiose biosynthesis (from UDP-D-glucuronate)	PWY-5113	UDP-D-apiose biosynthesis (from UDP-D-glucuronate)
Biosynthesis	Carbohydrate Biosynthesis	Sugar Biosynthesis	Sugar Nucleotide Biosynthesis	UDP-sugar Biosynthesis	UDP-sugars interconversion	UDP-sugars interconversion	UDP-sugars interconversion	PWY-5114	UDP-sugars interconversion
Biosynthesis	Carbohydrate Biosynthesis	Sugar Biosynthesis	Sugar Nucleotide Biosynthesis	UDP-sugar Biosynthesis	UDP-yelosamine biosynthesis	UDP-yelosamine biosynthesis	UDP-yelosamine biosynthesis	PWY-7842	UDP-yelosamine biosynthesis
Biosynthesis	Carbohydrate Biosynthesis	Sugar Biosynthesis	Sugar Nucleotide Biosynthesis	O-antigen building blocks biosynthesis (E. coli)	O-antigen building blocks biosynthesis (E. coli)	O-antigen building blocks biosynthesis (E. coli)	O-antigen building blocks biosynthesis (E. coli)	OANTIGEN-PWY	O-antigen building blocks biosynthesis (E. coli)
Biosynthesis	Carbohydrate Biosynthesis	Sugar Biosynthesis	Sugar Phosphate Biosynthesis	PRPP biosynthesis	PRPP biosynthesis	PRPP biosynthesis	PRPP biosynthesis	PWY0-662	PRPP biosynthesis
Biosynthesis	Carbohydrate Biosynthesis	Sugar Biosynthesis	Trehalose Biosynthesis	trehalose biosynthesis I	trehalose biosynthesis I	trehalose biosynthesis I	trehalose biosynthesis I	TRESYN-PWY	trehalose biosynthesis I
Biosynthesis	Carbohydrate Biosynthesis	Sugar Biosynthesis	Trehalose Biosynthesis	trehalose biosynthesis II	trehalose biosynthesis II	trehalose biosynthesis II	trehalose biosynthesis II	PWY-881	trehalose biosynthesis II
Biosynthesis	Carbohydrate Biosynthesis	Sugar Biosynthesis	Trehalose Biosynthesis	trehalose biosynthesis III	trehalose biosynthesis III	trehalose biosynthesis III	trehalose biosynthesis III	TREHALOSESYN-PWY	trehalose biosynthesis III
Biosynthesis	Carbohydrate Biosynthesis	Sugar Biosynthesis	Trehalose Biosynthesis	trehalose biosynthesis IV	trehalose biosynthesis IV	trehalose biosynthesis IV	trehalose biosynthesis IV	PWY-2622	trehalose biosynthesis IV
Biosynthesis	Carbohydrate Biosynthesis	Sugar Biosynthesis	Trehalose Biosynthesis	trehalose biosynthesis V	trehalose biosynthesis V	trehalose biosynthesis V	trehalose biosynthesis V	PWY-2661	trehalose biosynthesis V
Biosynthesis	Carbohydrate Biosynthesis	Sugar Biosynthesis	Trehalose Biosynthesis	trehalose biosynthesis VI	trehalose biosynthesis VI	trehalose biosynthesis VI	trehalose biosynthesis VI	PWY-5983	trehalose biosynthesis VI
Biosynthesis	Carbohydrate Biosynthesis	Sugar Biosynthesis	Trehalose Biosynthesis	trehalose biosynthesis VII	trehalose biosynthesis VII	trehalose biosynthesis VII	trehalose biosynthesis VII	PWY-5985	trehalose biosynthesis VII
Biosynthesis	Carbohydrate Biosynthesis	Sugar Biosynthesis	Calvin-Benson-Bassham cycle	Calvin-Benson-Bassham cycle	Calvin-Benson-Bassham cycle	Calvin-Benson-Bassham cycle	Calvin-Benson-Bassham cycle	CALVIN-PWY	Calvin-Benson-Bassham cycle
Biosynthesis	Carbohydrate Biosynthesis	2-keto-L-gulonate biosynthesis	2-keto-L-gulonate biosynthesis	2-keto-L-gulonate biosynthesis	2-keto-L-gulonate biosynthesis	2-keto-L-gulonate biosynthesis	2-keto-L-gulonate biosynthesis	PWY-5782	2-keto-L-gulonate biosynthesis
Biosynthesis	Carbohydrate Biosynthesis	colanic acid building blocks biosynthesis	colanic acid building blocks biosynthesis	colanic acid building blocks biosynthesis	colanic acid building blocks biosynthesis	colanic acid building blocks biosynthesis	colanic acid building blocks biosynthesis	COLANSYN-PWY	colanic acid building blocks biosynthesis
Biosynthesis	Carbohydrate Biosynthesis	cyclohexane-1-carboxyl-CoA biosynthesis	cyclohexane-1-carboxyl-CoA biosynthesis	cyclohexane-1-carboxyl-CoA biosynthesis	cyclohexane-1-carboxyl-CoA biosynthesis	cyclohexane-1-carboxyl-CoA biosynthesis	cyclohexane-1-carboxyl-CoA biosynthesis	PWY-8044	cyclohexane-1-carboxyl-CoA biosynthesis
Biosynthesis	Cell Structure Biosynthesis	Cell Wall Biosynthesis	Peptidoglycan Biosynthesis	peptidoglycan biosynthesis I (meso-diaminopimelate containing)	peptidoglycan biosynthesis I (meso-diaminopimelate containing)	peptidoglycan biosynthesis I (meso-diaminopimelate containing)	peptidoglycan biosynthesis I (meso-diaminopimelate containing)	PEPTIDOGLYCANSYN-PWY	peptidoglycan biosynthesis I (meso-diaminopimelate containing)
Biosynthesis	Cell Structure Biosynthesis	Cell Wall Biosynthesis	Peptidoglycan Biosynthesis	peptidoglycan biosynthesis II (staphylococci)	peptidoglycan biosynthesis II (staphylococci)	peptidoglycan biosynthesis II (staphylococci)	peptidoglycan biosynthesis II (staphylococci)	PWY-5265	peptidoglycan biosynthesis II (staphylococci)
Biosynthesis	Cell Structure Biosynthesis	Cell Wall Biosynthesis	Peptidoglycan Biosynthesis	peptidoglycan biosynthesis III (mycobacteria)	peptidoglycan biosynthesis III (mycobacteria)	peptidoglycan biosynthesis III (mycobacteria)	peptidoglycan biosynthesis III (mycobacteria)	PWY-6385	peptidoglycan biosynthesis III (mycobacteria)
Biosynthesis	Cell Structure Biosynthesis	Cell Wall Biosynthesis	Peptidoglycan Biosynthesis	peptidoglycan biosynthesis IV (Enterococcus faecium)	peptidoglycan biosynthesis IV (Enterococcus faecium)	peptidoglycan biosynthesis IV (Enterococcus faecium)	peptidoglycan biosynthesis IV (Enterococcus faecium)	PWY-6471	peptidoglycan biosynthesis IV (Enterococcus faecium)
Biosynthesis	Cell Structure Biosynthesis	Cell Wall Biosynthesis	Peptidoglycan Biosynthesis	peptidoglycan biosynthesis V (β-lactam resistance)	peptidoglycan biosynthesis V (β-lactam resistance)	peptidoglycan biosynthesis V (β-lactam resistance)	peptidoglycan biosynthesis V (β-lactam resistance)	PWY-6470	peptidoglycan biosynthesis V (β-lactam resistance)
Biosynthesis	Cell Structure Biosynthesis	Cell Wall Biosynthesis	Peptidoglycan Biosynthesis	peptidoglycan maturation (meso-diaminopimelate containing)	peptidoglycan maturation (meso-diaminopimelate containing)	peptidoglycan maturation (meso-diaminopimelate containing)	peptidoglycan maturation (meso-diaminopimelate containing)	PWY0-1586	peptidoglycan maturation (meso-diaminopimelate containing)
Biosynthesis	Cell Structure Biosynthesis	Cell Wall Biosynthesis	Peptidoglycan Cross-Bridge Biosynthesis	peptidoglycan cross-bridge biosynthesis I (S. aureus)	peptidoglycan cross-bridge biosynthesis I (S. aureus)	peptidoglycan cross-bridge biosynthesis I (S. aureus)	peptidoglycan cross-bridge biosynthesis I (S. aureus)	PWY-6459	peptidoglycan cross-bridge biosynthesis I (S. aureus)
Biosynthesis	Cell Structure Biosynthesis	Cell Wall Biosynthesis	Peptidoglycan Cross-Bridge Biosynthesis	peptidoglycan cross-bridge biosynthesis II (E. faecium)	peptidoglycan cross-bridge biosynthesis II (E. faecium)	peptidoglycan cross-bridge biosynthesis II (E. faecium)	peptidoglycan cross-bridge biosynthesis II (E. faecium)	PWY-6461	peptidoglycan cross-bridge biosynthesis II (E. faecium)
Biosynthesis	Cell Structure Biosynthesis	Cell Wall Biosynthesis	Peptidoglycan Cross-Bridge Biosynthesis	peptidoglycan cross-bridge biosynthesis III (Enterococcus faecalis)	peptidoglycan cross-bridge biosynthesis III (Enterococcus faecalis)	peptidoglycan cross-bridge biosynthesis III (Enterococcus faecalis)	peptidoglycan cross-bridge biosynthesis III (Enterococcus faecalis)	PWY-6462	peptidoglycan cross-bridge biosynthesis III (Enterococcus faecalis)
Biosynthesis	Cell Structure Biosynthesis	Cell Wall Biosynthesis	Peptidoglycan Cross-Bridge Biosynthesis	peptidoglycan cross-bridge biosynthesis IV (Weissella viridescens)	peptidoglycan cross-bridge biosynthesis IV (Weissella viridescens)	peptidoglycan cross-bridge biosynthesis IV (Weissella viridescens)	peptidoglycan cross-bridge biosynthesis IV (Weissella viridescens)	PWY-6463	peptidoglycan cross-bridge biosynthesis IV (Weissella viridescens)
Biosynthesis	Cell Structure Biosynthesis	Cell Wall Biosynthesis	Teichoic Acid Biosynthesis	2-acetamido-4-amino-2,4,6-trideoxy-α-D-galactosyl-diphospho-ditrans,octacis-undecaprenol biosynthesis	2-acetamido-4-amino-2,4,6-trideoxy-α-D-galactosyl-diphospho-ditrans,octacis-undecaprenol biosynthesis	2-acetamido-4-amino-2,4,6-trideoxy-α-D-galactosyl-diphospho-ditrans,octacis-undecaprenol biosynthesis	2-acetamido-4-amino-2,4,6-trideoxy-α-D-galactosyl-diphospho-ditrans,octacis-undecaprenol biosynthesis	PWY-7467	2-acetamido-4-amino-2,4,6-trideoxy-α-D-galactosyl-diphospho-ditrans,octacis-undecaprenol biosynthesis
Biosynthesis	Cell Structure Biosynthesis	Cell Wall Biosynthesis	Teichoic Acid Biosynthesis	poly(3-O-β-D-glucopyranosyl-N-acetylgalactosamine 1-phosphate) wall teichoic acid biosynthesis	poly(3-O-β-D-glucopyranosyl-N-acetylgalactosamine 1-phosphate) wall teichoic acid biosynthesis	poly(3-O-β-D-glucopyranosyl-N-acetylgalactosamine 1-phosphate) wall teichoic acid biosynthesis	poly(3-O-β-D-glucopyranosyl-N-acetylgalactosamine 1-phosphate) wall teichoic acid biosynthesis	PWY-7819	poly(3-O-β-D-glucopyranosyl-N-acetylgalactosamine 1-phosphate) wall teichoic acid biosynthesis
Biosynthesis	Cell Structure Biosynthesis	Cell Wall Biosynthesis	Teichoic Acid Biosynthesis	poly(glycerol phosphate) wall teichoic acid biosynthesis	poly(glycerol phosphate) wall teichoic acid biosynthesis	poly(glycerol phosphate) wall teichoic acid biosynthesis	poly(glycerol phosphate) wall teichoic acid biosynthesis	TEICHOICACID-PWY	poly(glycerol phosphate) wall teichoic acid biosynthesis
Biosynthesis	Cell Structure Biosynthesis	Cell Wall Biosynthesis	Teichoic Acid Biosynthesis	poly(ribitol phosphate) wall teichoic acid biosynthesis I (B. subtilis)	poly(ribitol phosphate) wall teichoic acid biosynthesis I (B. subtilis)	poly(ribitol phosphate) wall teichoic acid biosynthesis I (B. subtilis)	poly(ribitol phosphate) wall teichoic acid biosynthesis I (B. subtilis)	PWY-7815	poly(ribitol phosphate) wall teichoic acid biosynthesis I (B. subtilis)
Biosynthesis	Cell Structure Biosynthesis	Cell Wall Biosynthesis	Teichoic Acid Biosynthesis	poly(ribitol phosphate) wall teichoic acid biosynthesis II (S. aureus)	poly(ribitol phosphate) wall teichoic acid biosynthesis II (S. aureus)	poly(ribitol phosphate) wall teichoic acid biosynthesis II (S. aureus)	poly(ribitol phosphate) wall teichoic acid biosynthesis II (S. aureus)	PWY-7816	poly(ribitol phosphate) wall teichoic acid biosynthesis II (S. aureus)
Biosynthesis	Cell Structure Biosynthesis	Cell Wall Biosynthesis	Teichoic Acid Biosynthesis	type I lipoteichoic acid biosynthesis (S. aureus)	type I lipoteichoic acid biosynthesis (S. aureus)	type I lipoteichoic acid biosynthesis (S. aureus)	type I lipoteichoic acid biosynthesis (S. aureus)	PWY-7817	type I lipoteichoic acid biosynthesis (S. aureus)
Biosynthesis	Cell Structure Biosynthesis	Cell Wall Biosynthesis	Teichoic Acid Biosynthesis	type IV lipoteichoic acid biosynthesis (S. pneumoniae)	type IV lipoteichoic acid biosynthesis (S. pneumoniae)	type IV lipoteichoic acid biosynthesis (S. pneumoniae)	type IV lipoteichoic acid biosynthesis (S. pneumoniae)	PWY-7818	type IV lipoteichoic acid biosynthesis (S. pneumoniae)
Biosynthesis	Cell Structure Biosynthesis	Cell Wall Biosynthesis	UDP-N-Acetylmuramoyl-Pentapeptide Biosynthesis	UDP-N-acetylmuramoyl-pentapeptide biosynthesis I (meso-diaminopimelate containing)	UDP-N-acetylmuramoyl-pentapeptide biosynthesis I (meso-diaminopimelate containing)	UDP-N-acetylmuramoyl-pentapeptide biosynthesis I (meso-diaminopimelate containing)	UDP-N-acetylmuramoyl-pentapeptide biosynthesis I (meso-diaminopimelate containing)	PWY-6387	UDP-N-acetylmuramoyl-pentapeptide biosynthesis I (meso-diaminopimelate containing)
Biosynthesis	Cell Structure Biosynthesis	Cell Wall Biosynthesis	UDP-N-Acetylmuramoyl-Pentapeptide Biosynthesis	UDP-N-acetylmuramoyl-pentapeptide biosynthesis II (lysine-containing)	UDP-N-acetylmuramoyl-pentapeptide biosynthesis II (lysine-containing)	UDP-N-acetylmuramoyl-pentapeptide biosynthesis II (lysine-containing)	UDP-N-acetylmuramoyl-pentapeptide biosynthesis II (lysine-containing)	PWY-6386	UDP-N-acetylmuramoyl-pentapeptide biosynthesis II (lysine-containing)
Biosynthesis	Cell Structure Biosynthesis	Cell Wall Biosynthesis	UDP-N-Acetylmuramoyl-Pentapeptide Biosynthesis	UDP-N-acetylmuramoyl-pentapeptide biosynthesis III (meso-diaminopimelate containing)	UDP-N-acetylmuramoyl-pentapeptide biosynthesis III (meso-diaminopimelate containing)	UDP-N-acetylmuramoyl-pentapeptide biosynthesis III (meso-diaminopimelate containing)	UDP-N-acetylmuramoyl-pentapeptide biosynthesis III (meso-diaminopimelate containing)	PWY-7953	UDP-N-acetylmuramoyl-pentapeptide biosynthesis III (meso-diaminopimelate containing)
Biosynthesis	Cell Structure Biosynthesis	Cell Wall Biosynthesis	cytidine-5'-diphosphate-glycerol biosynthesis	cytidine-5'-diphosphate-glycerol biosynthesis	cytidine-5'-diphosphate-glycerol biosynthesis	cytidine-5'-diphosphate-glycerol biosynthesis	cytidine-5'-diphosphate-glycerol biosynthesis	PWY-6626	cytidine-5'-diphosphate-glycerol biosynthesis
Biosynthesis	Cell Structure Biosynthesis	Cell Wall Biosynthesis	mycolyl-arabinogalactan-peptidoglycan complex biosynthesis	mycolyl-arabinogalactan-peptidoglycan complex biosynthesis	mycolyl-arabinogalactan-peptidoglycan complex biosynthesis	mycolyl-arabinogalactan-peptidoglycan complex biosynthesis	mycolyl-arabinogalactan-peptidoglycan complex biosynthesis	PWY-6397	mycolyl-arabinogalactan-peptidoglycan complex biosynthesis
Biosynthesis	Cell Structure Biosynthesis	Cell Wall Biosynthesis	superpathway of mycolyl-arabinogalactan-peptidoglycan complex biosynthesis	superpathway of mycolyl-arabinogalactan-peptidoglycan complex biosynthesis	superpathway of mycolyl-arabinogalactan-peptidoglycan complex biosynthesis	superpathway of mycolyl-arabinogalactan-peptidoglycan complex biosynthesis	superpathway of mycolyl-arabinogalactan-peptidoglycan complex biosynthesis	PWY-6404	superpathway of mycolyl-arabinogalactan-peptidoglycan complex biosynthesis
Biosynthesis	Cell Structure Biosynthesis	Cell Wall Biosynthesis	teichuronic acid biosynthesis (B. subtilis 168)	teichuronic acid biosynthesis (B. subtilis 168)	teichuronic acid biosynthesis (B. subtilis 168)	teichuronic acid biosynthesis (B. subtilis 168)	teichuronic acid biosynthesis (B. subtilis 168)	PWY-7820	teichuronic acid biosynthesis (B. subtilis 168)
Biosynthesis	Cell Structure Biosynthesis	Cell Wall Biosynthesis	vancomycin resistance I	vancomycin resistance I	vancomycin resistance I	vancomycin resistance I	vancomycin resistance I	PWY-6454	vancomycin resistance I
Biosynthesis	Cell Structure Biosynthesis	Cell Wall Biosynthesis	vancomycin resistance II	vancomycin resistance II	vancomycin resistance II	vancomycin resistance II	vancomycin resistance II	PWY-6455	vancomycin resistance II
Biosynthesis	Cell Structure Biosynthesis	Lipopolysaccharide Biosynthesis	O-Antigen Biosynthesis	β-D-galactosaminyl-(1->3)-N-acetyl-α-D-galactosamine biosynthesis	β-D-galactosaminyl-(1->3)-N-acetyl-α-D-galactosamine biosynthesis	β-D-galactosaminyl-(1->3)-N-acetyl-α-D-galactosamine biosynthesis	β-D-galactosaminyl-(1->3)-N-acetyl-α-D-galactosamine biosynthesis	PWY-7530	β-D-galactosaminyl-(1->3)-N-acetyl-α-D-galactosamine biosynthesis
Biosynthesis	Cell Structure Biosynthesis	Lipopolysaccharide Biosynthesis	O-Antigen Biosynthesis	Escherichia coli serotype O9a O-antigen biosynthesis	Escherichia coli serotype O9a O-antigen biosynthesis	Escherichia coli serotype O9a O-antigen biosynthesis	Escherichia coli serotype O9a O-antigen biosynthesis	PWY-7905	Escherichia coli serotype O9a O-antigen biosynthesis
Biosynthesis	Cell Structure Biosynthesis	Lipopolysaccharide Biosynthesis	O-Antigen Biosynthesis	Escherichia coli serotype O86 O-antigen biosynthesis	Escherichia coli serotype O86 O-antigen biosynthesis	Escherichia coli serotype O86 O-antigen biosynthesis	Escherichia coli serotype O86 O-antigen biosynthesis	PWY-7290	Escherichia coli serotype O86 O-antigen biosynthesis
Biosynthesis	Cell Structure Biosynthesis	Lipopolysaccharide Biosynthesis	Kdo Transfer to Lipid IVA	Kdo transfer to lipid IVA I (E. coli)	Kdo transfer to lipid IVA I (E. coli)	Kdo transfer to lipid IVA I (E. coli)	Kdo transfer to lipid IVA I (E. coli)	KDOSYN-PWY	Kdo transfer to lipid IVA I (E. coli)
Biosynthesis	Cell Structure Biosynthesis	Lipopolysaccharide Biosynthesis	Kdo Transfer to Lipid IVA	Kdo transfer to lipid IVA II (Haemophilus)	Kdo transfer to lipid IVA II (Haemophilus)	Kdo transfer to lipid IVA II (Haemophilus)	Kdo transfer to lipid IVA II (Haemophilus)	PWY-7675	Kdo transfer to lipid IVA II (Haemophilus)
Biosynthesis	Cell Structure Biosynthesis	Lipopolysaccharide Biosynthesis	Kdo Transfer to Lipid IVA	Kdo transfer to lipid IVA III (Chlamydia)	Kdo transfer to lipid IVA III (Chlamydia)	Kdo transfer to lipid IVA III (Chlamydia)	Kdo transfer to lipid IVA III (Chlamydia)	PWY-6467	Kdo transfer to lipid IVA III (Chlamydia)
Biosynthesis	Cell Structure Biosynthesis	Lipopolysaccharide Biosynthesis	Kdo Transfer to Lipid IVA	Kdo transfer to lipid IVA IV (P. putida)	Kdo transfer to lipid IVA IV (P. putida)	Kdo transfer to lipid IVA IV (P. putida)	Kdo transfer to lipid IVA IV (P. putida)	PWY-8074	Kdo transfer to lipid IVA IV (P. putida)
Biosynthesis	Cell Structure Biosynthesis	Lipopolysaccharide Biosynthesis	Kdo Transfer to Lipid IVA	Kdo8N transfer to lipid IVA	Kdo8N transfer to lipid IVA	Kdo8N transfer to lipid IVA	Kdo8N transfer to lipid IVA	PWY-7676	Kdo8N transfer to lipid IVA
Biosynthesis	Cell Structure Biosynthesis	Lipopolysaccharide Biosynthesis	enterobacterial common antigen biosynthesis	enterobacterial common antigen biosynthesis	enterobacterial common antigen biosynthesis	enterobacterial common antigen biosynthesis	enterobacterial common antigen biosynthesis	ECASYN-PWY	enterobacterial common antigen biosynthesis
Biosynthesis	Cell Structure Biosynthesis	Lipopolysaccharide Biosynthesis	lipid IVA biosynthesis (P. putida)	lipid IVA biosynthesis (P. putida)	lipid IVA biosynthesis (P. putida)	lipid IVA biosynthesis (P. putida)	lipid IVA biosynthesis (P. putida)	PWY-8073	lipid IVA biosynthesis (P. putida)
Biosynthesis	Cell Structure Biosynthesis	Lipopolysaccharide Biosynthesis	lipid IVA biosynthesis (E. coli)	lipid IVA biosynthesis (E. coli)	lipid IVA biosynthesis (E. coli)	lipid IVA biosynthesis (E. coli)	lipid IVA biosynthesis (E. coli)	NAGLIPASYN-PWY	lipid IVA biosynthesis (E. coli)
Biosynthesis	Cell Structure Biosynthesis	Lipopolysaccharide Biosynthesis	polymyxin resistance	polymyxin resistance	polymyxin resistance	polymyxin resistance	polymyxin resistance	PWY0-1338	polymyxin resistance
Biosynthesis	Cell Structure Biosynthesis	Lipopolysaccharide Biosynthesis	superpathway of (Kdo)2-lipid A biosynthesis	superpathway of (Kdo)2-lipid A biosynthesis	superpathway of (Kdo)2-lipid A biosynthesis	superpathway of (Kdo)2-lipid A biosynthesis	superpathway of (Kdo)2-lipid A biosynthesis	KDO-NAGLIPASYN-PWY	superpathway of (Kdo)2-lipid A biosynthesis
Biosynthesis	Cell Structure Biosynthesis	Plant Cell Structures	Epidermal Structures	cuticular wax biosynthesis	cuticular wax biosynthesis	cuticular wax biosynthesis	cuticular wax biosynthesis	PWY-282	cuticular wax biosynthesis
Biosynthesis	Cell Structure Biosynthesis	Plant Cell Structures	Epidermal Structures	cutin biosynthesis	cutin biosynthesis	cutin biosynthesis	cutin biosynthesis	PWY-321	cutin biosynthesis
Biosynthesis	Cell Structure Biosynthesis	Plant Cell Structures	Primary Cell Wall	cellulose biosynthesis	cellulose biosynthesis	cellulose biosynthesis	cellulose biosynthesis	PWY-1001	cellulose biosynthesis
Biosynthesis	Cell Structure Biosynthesis	Plant Cell Structures	Primary Cell Wall	homogalacturonan biosynthesis	homogalacturonan biosynthesis	homogalacturonan biosynthesis	homogalacturonan biosynthesis	PWY-1061	homogalacturonan biosynthesis
Biosynthesis	Cell Structure Biosynthesis	Plant Cell Structures	Primary Cell Wall	xylogalacturonan biosynthesis	xylogalacturonan biosynthesis	xylogalacturonan biosynthesis	xylogalacturonan biosynthesis	PWY-5980	xylogalacturonan biosynthesis
Biosynthesis	Cell Structure Biosynthesis	Plant Cell Structures	Secondary Cell Wall	cellulose biosynthesis	cellulose biosynthesis	cellulose biosynthesis	cellulose biosynthesis	PWY-1001	cellulose biosynthesis
Biosynthesis	Cell Structure Biosynthesis	Plant Cell Structures	Secondary Cell Wall	phenylpropanoid biosynthesis	phenylpropanoid biosynthesis	phenylpropanoid biosynthesis	phenylpropanoid biosynthesis	PWY-361	phenylpropanoid biosynthesis
Biosynthesis	Cell Structure Biosynthesis	Plant Cell Structures	Secondary Cell Wall	xylan biosynthesis	xylan biosynthesis	xylan biosynthesis	xylan biosynthesis	PWY-5800	xylan biosynthesis
Biosynthesis	Cell Structure Biosynthesis	Plant Cell Structures	esterified suberin biosynthesis	esterified suberin biosynthesis	esterified suberin biosynthesis	esterified suberin biosynthesis	esterified suberin biosynthesis	PWY-7120	esterified suberin biosynthesis
Biosynthesis	Cell Structure Biosynthesis	Plant Cell Structures	sporopollenin precursors biosynthesis	sporopollenin precursors biosynthesis	sporopollenin precursors biosynthesis	sporopollenin precursors biosynthesis	sporopollenin precursors biosynthesis	PWY-6733	sporopollenin precursors biosynthesis
Biosynthesis	Cell Structure Biosynthesis	Plant Cell Structures	suberin monomers biosynthesis	suberin monomers biosynthesis	suberin monomers biosynthesis	suberin monomers biosynthesis	suberin monomers biosynthesis	PWY-1121	suberin monomers biosynthesis
Biosynthesis	Cofactor, Prosthetic Group, Electron Carrier, and Vitamin Biosynthesis	cob(II)yrinate a,c-diamide biosynthesis	cob(II)yrinate a,c-diamide biosynthesis I (early cobalt insertion)	cob(II)yrinate a,c-diamide biosynthesis I (early cobalt insertion)	cob(II)yrinate a,c-diamide biosynthesis I (early cobalt insertion)	cob(II)yrinate a,c-diamide biosynthesis I (early cobalt insertion)	cob(II)yrinate a,c-diamide biosynthesis I (early cobalt insertion)	PWY-7377	cob(II)yrinate a,c-diamide biosynthesis I (early cobalt insertion)
Biosynthesis	Cofactor, Prosthetic Group, Electron Carrier, and Vitamin Biosynthesis	cob(II)yrinate a,c-diamide biosynthesis	cob(II)yrinate a,c-diamide biosynthesis II (late cobalt incorporation)	cob(II)yrinate a,c-diamide biosynthesis II (late cobalt incorporation)	cob(II)yrinate a,c-diamide biosynthesis II (late cobalt incorporation)	cob(II)yrinate a,c-diamide biosynthesis II (late cobalt incorporation)	cob(II)yrinate a,c-diamide biosynthesis II (late cobalt incorporation)	PWY-7376	cob(II)yrinate a,c-diamide biosynthesis II (late cobalt incorporation)
Biosynthesis	Cofactor, Prosthetic Group, Electron Carrier, and Vitamin Biosynthesis	Coenzyme A Biosynthesis	coenzyme A biosynthesis I (prokaryotic)	coenzyme A biosynthesis I (prokaryotic)	coenzyme A biosynthesis I (prokaryotic)	coenzyme A biosynthesis I (prokaryotic)	coenzyme A biosynthesis I (prokaryotic)	COA-PWY	coenzyme A biosynthesis I (prokaryotic)
Biosynthesis	Cofactor, Prosthetic Group, Electron Carrier, and Vitamin Biosynthesis	Coenzyme A Biosynthesis	coenzyme A biosynthesis II (eukaryotic)	coenzyme A biosynthesis II (eukaryotic)	coenzyme A biosynthesis II (eukaryotic)	coenzyme A biosynthesis II (eukaryotic)	coenzyme A biosynthesis II (eukaryotic)	PWY-7851	coenzyme A biosynthesis II (eukaryotic)
Biosynthesis	Cofactor, Prosthetic Group, Electron Carrier, and Vitamin Biosynthesis	Coenzyme A Biosynthesis	superpathway of coenzyme A biosynthesis I (bacteria)	superpathway of coenzyme A biosynthesis I (bacteria)	superpathway of coenzyme A biosynthesis I (bacteria)	superpathway of coenzyme A biosynthesis I (bacteria)	superpathway of coenzyme A biosynthesis I (bacteria)	PANTOSYN-PWY	superpathway of coenzyme A biosynthesis I (bacteria)
Biosynthesis	Cofactor, Prosthetic Group, Electron Carrier, and Vitamin Biosynthesis	Coenzyme A Biosynthesis	superpathway of coenzyme A biosynthesis II (plants)	superpathway of coenzyme A biosynthesis II (plants)	superpathway of coenzyme A biosynthesis II (plants)	superpathway of coenzyme A biosynthesis II (plants)	superpathway of coenzyme A biosynthesis II (plants)	PWY-4221	superpathway of coenzyme A biosynthesis II (plants)
Biosynthesis	Cofactor, Prosthetic Group, Electron Carrier, and Vitamin Biosynthesis	Coenzyme A Biosynthesis	superpathway of coenzyme A biosynthesis III (mammals)	superpathway of coenzyme A biosynthesis III (mammals)	superpathway of coenzyme A biosynthesis III (mammals)	superpathway of coenzyme A biosynthesis III (mammals)	superpathway of coenzyme A biosynthesis III (mammals)	COA-PWY-1	superpathway of coenzyme A biosynthesis III (mammals)
Biosynthesis	Cofactor, Prosthetic Group, Electron Carrier, and Vitamin Biosynthesis	Coenzyme B/Coenzyme M Regeneration	coenzyme B/coenzyme M regeneration I (methanophenazine-dependent)	coenzyme B/coenzyme M regeneration I (methanophenazine-dependent)	coenzyme B/coenzyme M regeneration I (methanophenazine-dependent)	coenzyme B/coenzyme M regeneration I (methanophenazine-dependent)	coenzyme B/coenzyme M regeneration I (methanophenazine-dependent)	PWY-5207	coenzyme B/coenzyme M regeneration I (methanophenazine-dependent)
Biosynthesis	Cofactor, Prosthetic Group, Electron Carrier, and Vitamin Biosynthesis	Coenzyme B/Coenzyme M Regeneration	coenzyme B/coenzyme M regeneration II (ferredoxin-dependent)	coenzyme B/coenzyme M regeneration II (ferredoxin-dependent)	coenzyme B/coenzyme M regeneration II (ferredoxin-dependent)	coenzyme B/coenzyme M regeneration II (ferredoxin-dependent)	coenzyme B/coenzyme M regeneration II (ferredoxin-dependent)	PWY-7865	coenzyme B/coenzyme M regeneration II (ferredoxin-dependent)
Biosynthesis	Cofactor, Prosthetic Group, Electron Carrier, and Vitamin Biosynthesis	Coenzyme B/Coenzyme M Regeneration	coenzyme B/coenzyme M regeneration III (coenzyme F420-dependent)	coenzyme B/coenzyme M regeneration III (coenzyme F420-dependent)	coenzyme B/coenzyme M regeneration III (coenzyme F420-dependent)	coenzyme B/coenzyme M regeneration III (coenzyme F420-dependent)	coenzyme B/coenzyme M regeneration III (coenzyme F420-dependent)	PWY-7866	coenzyme B/coenzyme M regeneration III (coenzyme F420-dependent)
Biosynthesis	Cofactor, Prosthetic Group, Electron Carrier, and Vitamin Biosynthesis	Coenzyme B/Coenzyme M Regeneration	coenzyme B/coenzyme M regeneration IV (H2-dependent)	coenzyme B/coenzyme M regeneration IV (H2-dependent)	coenzyme B/coenzyme M regeneration IV (H2-dependent)	coenzyme B/coenzyme M regeneration IV (H2-dependent)	coenzyme B/coenzyme M regeneration IV (H2-dependent)	PWY-7867	coenzyme B/coenzyme M regeneration IV (H2-dependent)
Biosynthesis	Cofactor, Prosthetic Group, Electron Carrier, and Vitamin Biosynthesis	Coenzyme B/Coenzyme M Regeneration	coenzyme B/coenzyme M regeneration V (formate-dependent)	coenzyme B/coenzyme M regeneration V (formate-dependent)	coenzyme B/coenzyme M regeneration V (formate-dependent)	coenzyme B/coenzyme M regeneration V (formate-dependent)	coenzyme B/coenzyme M regeneration V (formate-dependent)	PWY-7868	coenzyme B/coenzyme M regeneration V (formate-dependent)
Biosynthesis	Cofactor, Prosthetic Group, Electron Carrier, and Vitamin Biosynthesis	Coenzyme M Biosynthesis	coenzyme M biosynthesis I	coenzyme M biosynthesis I	coenzyme M biosynthesis I	coenzyme M biosynthesis I	coenzyme M biosynthesis I	P261-PWY	coenzyme M biosynthesis I
Biosynthesis	Cofactor, Prosthetic Group, Electron Carrier, and Vitamin Biosynthesis	Coenzyme M Biosynthesis	coenzyme M biosynthesis II	coenzyme M biosynthesis II	coenzyme M biosynthesis II	coenzyme M biosynthesis II	coenzyme M biosynthesis II	PWY-6643	coenzyme M biosynthesis II
Biosynthesis	Cofactor, Prosthetic Group, Electron Carrier, and Vitamin Biosynthesis	Lipoate Biosynthesis	lipoate biosynthesis and incorporation I	lipoate biosynthesis and incorporation I	lipoate biosynthesis and incorporation I	lipoate biosynthesis and incorporation I	lipoate biosynthesis and incorporation I	PWY0-501	lipoate biosynthesis and incorporation I
Biosynthesis	Cofactor, Prosthetic Group, Electron Carrier, and Vitamin Biosynthesis	Lipoate Biosynthesis	lipoate biosynthesis and incorporation II	lipoate biosynthesis and incorporation II	lipoate biosynthesis and incorporation II	lipoate biosynthesis and incorporation II	lipoate biosynthesis and incorporation II	PWY0-1275	lipoate biosynthesis and incorporation II
Biosynthesis	Cofactor, Prosthetic Group, Electron Carrier, and Vitamin Biosynthesis	Lipoate Biosynthesis	lipoate biosynthesis and incorporation III (Bacillus)	lipoate biosynthesis and incorporation III (Bacillus)	lipoate biosynthesis and incorporation III (Bacillus)	lipoate biosynthesis and incorporation III (Bacillus)	lipoate biosynthesis and incorporation III (Bacillus)	PWY-6987	lipoate biosynthesis and incorporation III (Bacillus)
Biosynthesis	Cofactor, Prosthetic Group, Electron Carrier, and Vitamin Biosynthesis	Lipoate Biosynthesis	lipoate biosynthesis and incorporation IV (yeast)	lipoate biosynthesis and incorporation IV (yeast)	lipoate biosynthesis and incorporation IV (yeast)	lipoate biosynthesis and incorporation IV (yeast)	lipoate biosynthesis and incorporation IV (yeast)	PWY-7382	lipoate biosynthesis and incorporation IV (yeast)
Biosynthesis	Cofactor, Prosthetic Group, Electron Carrier, and Vitamin Biosynthesis	Lipoate Biosynthesis	lipoate salvage I	lipoate salvage I	lipoate salvage I	lipoate salvage I	lipoate salvage I	PWY0-522	lipoate salvage I
Biosynthesis	Cofactor, Prosthetic Group, Electron Carrier, and Vitamin Biosynthesis	Lipoate Biosynthesis	lipoate salvage II	lipoate salvage II	lipoate salvage II	lipoate salvage II	lipoate salvage II	PWY-6984	lipoate salvage II
Biosynthesis	Cofactor, Prosthetic Group, Electron Carrier, and Vitamin Biosynthesis	Molybdenum Cofactor Biosynthesis	molybdenum cofactor biosynthesis	molybdenum cofactor biosynthesis	molybdenum cofactor biosynthesis	molybdenum cofactor biosynthesis	molybdenum cofactor biosynthesis	PWY-6823	molybdenum cofactor biosynthesis
Biosynthesis	Cofactor, Prosthetic Group, Electron Carrier, and Vitamin Biosynthesis	NAD Metabolism	NAD Biosynthesis	NAD de novo biosynthesis I (from aspartate)	NAD de novo biosynthesis I (from aspartate)	NAD de novo biosynthesis I (from aspartate)	NAD de novo biosynthesis I (from aspartate)	PYRIDNUCSYN-PWY	NAD de novo biosynthesis I (from aspartate)
Biosynthesis	Cofactor, Prosthetic Group, Electron Carrier, and Vitamin Biosynthesis	NAD Metabolism	NAD Biosynthesis	NAD de novo biosynthesis II (from tryptophan)	NAD de novo biosynthesis II (from tryptophan)	NAD de novo biosynthesis II (from tryptophan)	NAD de novo biosynthesis II (from tryptophan)	NADSYN-PWY	NAD de novo biosynthesis II (from tryptophan)
Biosynthesis	Cofactor, Prosthetic Group, Electron Carrier, and Vitamin Biosynthesis	NAD Metabolism	NAD Biosynthesis	NAD biosynthesis from 2-amino-3-carboxymuconate semialdehyde	NAD biosynthesis from 2-amino-3-carboxymuconate semialdehyde	NAD biosynthesis from 2-amino-3-carboxymuconate semialdehyde	NAD biosynthesis from 2-amino-3-carboxymuconate semialdehyde	PWY-5653	NAD biosynthesis from 2-amino-3-carboxymuconate semialdehyde
Biosynthesis	Cofactor, Prosthetic Group, Electron Carrier, and Vitamin Biosynthesis	NAD Metabolism	NAD Biosynthesis	NAD biosynthesis III (from nicotinamide)	NAD biosynthesis III (from nicotinamide)	NAD biosynthesis III (from nicotinamide)	NAD biosynthesis III (from nicotinamide)	NAD-BIOSYNTHESIS-III	NAD biosynthesis III (from nicotinamide)
Biosynthesis	Cofactor, Prosthetic Group, Electron Carrier, and Vitamin Biosynthesis	NAD Metabolism	NAD Biosynthesis	NAD salvage pathway I (PNC VI cycle)	NAD salvage pathway I (PNC VI cycle)	NAD salvage pathway I (PNC VI cycle)	NAD salvage pathway I (PNC VI cycle)	PYRIDNUCSAL-PWY	NAD salvage pathway I (PNC VI cycle)
Biosynthesis	Cofactor, Prosthetic Group, Electron Carrier, and Vitamin Biosynthesis	NAD Metabolism	NAD Biosynthesis	NAD salvage pathway II (PNC IV cycle)	NAD salvage pathway II (PNC IV cycle)	NAD salvage pathway II (PNC IV cycle)	NAD salvage pathway II (PNC IV cycle)	PWY-7761	NAD salvage pathway II (PNC IV cycle)
Biosynthesis	Cofactor, Prosthetic Group, Electron Carrier, and Vitamin Biosynthesis	NAD Metabolism	NAD Biosynthesis	NAD salvage pathway III (to nicotinamide riboside)	NAD salvage pathway III (to nicotinamide riboside)	NAD salvage pathway III (to nicotinamide riboside)	NAD salvage pathway III (to nicotinamide riboside)	NAD-BIOSYNTHESIS-II	NAD salvage pathway III (to nicotinamide riboside)
Biosynthesis	Cofactor, Prosthetic Group, Electron Carrier, and Vitamin Biosynthesis	NAD Metabolism	NAD Biosynthesis	NAD salvage pathway IV (from nicotinamide riboside)	NAD salvage pathway IV (from nicotinamide riboside)	NAD salvage pathway IV (from nicotinamide riboside)	NAD salvage pathway IV (from nicotinamide riboside)	PWY3O-4106	NAD salvage pathway IV (from nicotinamide riboside)
Biosynthesis	Cofactor, Prosthetic Group, Electron Carrier, and Vitamin Biosynthesis	NAD Metabolism	NAD Biosynthesis	NAD salvage pathway V (PNC V cycle)	NAD salvage pathway V (PNC V cycle)	NAD salvage pathway V (PNC V cycle)	NAD salvage pathway V (PNC V cycle)	PWY3O-4107	NAD salvage pathway V (PNC V cycle)
Biosynthesis	Cofactor, Prosthetic Group, Electron Carrier, and Vitamin Biosynthesis	NAD Metabolism	NAD Biosynthesis	superpathway of NAD biosynthesis in eukaryotes	superpathway of NAD biosynthesis in eukaryotes	superpathway of NAD biosynthesis in eukaryotes	superpathway of NAD biosynthesis in eukaryotes	PWY-3502	superpathway of NAD biosynthesis in eukaryotes
Biosynthesis	Cofactor, Prosthetic Group, Electron Carrier, and Vitamin Biosynthesis	NAD Metabolism	NAD phosphorylation and dephosphorylation	NAD phosphorylation and dephosphorylation	NAD phosphorylation and dephosphorylation	NAD phosphorylation and dephosphorylation	NAD phosphorylation and dephosphorylation	NADPHOS-DEPHOS-PWY	NAD phosphorylation and dephosphorylation
Biosynthesis	Cofactor, Prosthetic Group, Electron Carrier, and Vitamin Biosynthesis	NAD Metabolism	NAD phosphorylation and transhydrogenation	NAD phosphorylation and transhydrogenation	NAD phosphorylation and transhydrogenation	NAD phosphorylation and transhydrogenation	NAD phosphorylation and transhydrogenation	NADPHOS-DEPHOS-PWY-1	NAD phosphorylation and transhydrogenation
Biosynthesis	Cofactor, Prosthetic Group, Electron Carrier, and Vitamin Biosynthesis	NAD Metabolism	NAD/NADH phosphorylation and dephosphorylation	NAD/NADH phosphorylation and dephosphorylation	NAD/NADH phosphorylation and dephosphorylation	NAD/NADH phosphorylation and dephosphorylation	NAD/NADH phosphorylation and dephosphorylation	PWY-5083	NAD/NADH phosphorylation and dephosphorylation
Biosynthesis	Cofactor, Prosthetic Group, Electron Carrier, and Vitamin Biosynthesis	NAD Metabolism	NAD/NADP-NADH/NADPH cytosolic interconversion (yeast)	NAD/NADP-NADH/NADPH cytosolic interconversion (yeast)	NAD/NADP-NADH/NADPH cytosolic interconversion (yeast)	NAD/NADP-NADH/NADPH cytosolic interconversion (yeast)	NAD/NADP-NADH/NADPH cytosolic interconversion (yeast)	PWY-7268	NAD/NADP-NADH/NADPH cytosolic interconversion (yeast)
Biosynthesis	Cofactor, Prosthetic Group, Electron Carrier, and Vitamin Biosynthesis	NAD Metabolism	NAD/NADP-NADH/NADPH mitochondrial interconversion (yeast)	NAD/NADP-NADH/NADPH mitochondrial interconversion (yeast)	NAD/NADP-NADH/NADPH mitochondrial interconversion (yeast)	NAD/NADP-NADH/NADPH mitochondrial interconversion (yeast)	NAD/NADP-NADH/NADPH mitochondrial interconversion (yeast)	PWY-7269	NAD/NADP-NADH/NADPH mitochondrial interconversion (yeast)
Biosynthesis	Cofactor, Prosthetic Group, Electron Carrier, and Vitamin Biosynthesis	NAD Metabolism	pyridine nucleotide cycling (plants)	pyridine nucleotide cycling (plants)	pyridine nucleotide cycling (plants)	pyridine nucleotide cycling (plants)	pyridine nucleotide cycling (plants)	PWY-5381	pyridine nucleotide cycling (plants)
Biosynthesis	Cofactor, Prosthetic Group, Electron Carrier, and Vitamin Biosynthesis	NAD Metabolism	superpathway of NAD/NADP - NADH/NADPH interconversion (yeast)	superpathway of NAD/NADP - NADH/NADPH interconversion (yeast)	superpathway of NAD/NADP - NADH/NADPH interconversion (yeast)	superpathway of NAD/NADP - NADH/NADPH interconversion (yeast)	superpathway of NAD/NADP - NADH/NADPH interconversion (yeast)	PWY-7245	superpathway of NAD/NADP - NADH/NADPH interconversion (yeast)
Biosynthesis	Cofactor, Prosthetic Group, Electron Carrier, and Vitamin Biosynthesis	Polyprenyl Biosynthesis	All-Trans-Farnesyl-PP-Biosynthesis	trans, trans-farnesyl diphosphate biosynthesis	trans, trans-farnesyl diphosphate biosynthesis	trans, trans-farnesyl diphosphate biosynthesis	trans, trans-farnesyl diphosphate biosynthesis	PWY-5123	trans, trans-farnesyl diphosphate biosynthesis
Biosynthesis	Cofactor, Prosthetic Group, Electron Carrier, and Vitamin Biosynthesis	Polyprenyl Biosynthesis	All-Trans-Farnesyl-PP-Biosynthesis	farnesylcysteine salvage pathway	farnesylcysteine salvage pathway	farnesylcysteine salvage pathway	farnesylcysteine salvage pathway	PWY-6577	farnesylcysteine salvage pathway
Biosynthesis	Cofactor, Prosthetic Group, Electron Carrier, and Vitamin Biosynthesis	Polyprenyl Biosynthesis	Geranylgeranyl Diphosphate Biosynthesis	geranylgeranyl diphosphate biosynthesis	geranylgeranyl diphosphate biosynthesis	geranylgeranyl diphosphate biosynthesis	geranylgeranyl diphosphate biosynthesis	PWY-5120	geranylgeranyl diphosphate biosynthesis
Biosynthesis	Cofactor, Prosthetic Group, Electron Carrier, and Vitamin Biosynthesis	Polyprenyl Biosynthesis	Geranylgeranyl Diphosphate Biosynthesis	superpathway of geranylgeranyl diphosphate biosynthesis II (via MEP)	superpathway of geranylgeranyl diphosphate biosynthesis II (via MEP)	superpathway of geranylgeranyl diphosphate biosynthesis II (via MEP)	superpathway of geranylgeranyl diphosphate biosynthesis II (via MEP)	PWY-5121	superpathway of geranylgeranyl diphosphate biosynthesis II (via MEP)
Biosynthesis	Cofactor, Prosthetic Group, Electron Carrier, and Vitamin Biosynthesis	Polyprenyl Biosynthesis	Geranylgeranyl Diphosphate Biosynthesis	superpathway of geranylgeranyldiphosphate biosynthesis I (via mevalonate)	superpathway of geranylgeranyldiphosphate biosynthesis I (via mevalonate)	superpathway of geranylgeranyldiphosphate biosynthesis I (via mevalonate)	superpathway of geranylgeranyldiphosphate biosynthesis I (via mevalonate)	PWY-5910	superpathway of geranylgeranyldiphosphate biosynthesis I (via mevalonate)
Biosynthesis	Cofactor, Prosthetic Group, Electron Carrier, and Vitamin Biosynthesis	Polyprenyl Biosynthesis	all trans undecaprenyl diphosphate biosynthesis	all trans undecaprenyl diphosphate biosynthesis	all trans undecaprenyl diphosphate biosynthesis	all trans undecaprenyl diphosphate biosynthesis	all trans undecaprenyl diphosphate biosynthesis	PWY-5816	all trans undecaprenyl diphosphate biosynthesis
Biosynthesis	Cofactor, Prosthetic Group, Electron Carrier, and Vitamin Biosynthesis	Polyprenyl Biosynthesis	all-trans-decaprenyl diphosphate biosynthesis	all-trans-decaprenyl diphosphate biosynthesis	all-trans-decaprenyl diphosphate biosynthesis	all-trans-decaprenyl diphosphate biosynthesis	all-trans-decaprenyl diphosphate biosynthesis	PWY-5806	all-trans-decaprenyl diphosphate biosynthesis
Biosynthesis	Cofactor, Prosthetic Group, Electron Carrier, and Vitamin Biosynthesis	Polyprenyl Biosynthesis	di-trans,poly-cis-undecaprenyl phosphate biosynthesis	di-trans,poly-cis-undecaprenyl phosphate biosynthesis	di-trans,poly-cis-undecaprenyl phosphate biosynthesis	di-trans,poly-cis-undecaprenyl phosphate biosynthesis	di-trans,poly-cis-undecaprenyl phosphate biosynthesis	PWY-5785	di-trans,poly-cis-undecaprenyl phosphate biosynthesis
Biosynthesis	Cofactor, Prosthetic Group, Electron Carrier, and Vitamin Biosynthesis	Polyprenyl Biosynthesis	dodecaprenyl diphosphate biosynthesis	dodecaprenyl diphosphate biosynthesis	dodecaprenyl diphosphate biosynthesis	dodecaprenyl diphosphate biosynthesis	dodecaprenyl diphosphate biosynthesis	PWY-5817	dodecaprenyl diphosphate biosynthesis
Biosynthesis	Cofactor, Prosthetic Group, Electron Carrier, and Vitamin Biosynthesis	Polyprenyl Biosynthesis	geranyl diphosphate biosynthesis	geranyl diphosphate biosynthesis	geranyl diphosphate biosynthesis	geranyl diphosphate biosynthesis	geranyl diphosphate biosynthesis	PWY-5122	geranyl diphosphate biosynthesis
Biosynthesis	Cofactor, Prosthetic Group, Electron Carrier, and Vitamin Biosynthesis	Polyprenyl Biosynthesis	heptaprenyl diphosphate biosynthesis	heptaprenyl diphosphate biosynthesis	heptaprenyl diphosphate biosynthesis	heptaprenyl diphosphate biosynthesis	heptaprenyl diphosphate biosynthesis	PWY-5807	heptaprenyl diphosphate biosynthesis
Biosynthesis	Cofactor, Prosthetic Group, Electron Carrier, and Vitamin Biosynthesis	Polyprenyl Biosynthesis	hexaprenyl diphosphate biosynthesis	hexaprenyl diphosphate biosynthesis	hexaprenyl diphosphate biosynthesis	hexaprenyl diphosphate biosynthesis	hexaprenyl diphosphate biosynthesis	HEXPPSYN-PWY	hexaprenyl diphosphate biosynthesis
Biosynthesis	Cofactor, Prosthetic Group, Electron Carrier, and Vitamin Biosynthesis	Polyprenyl Biosynthesis	mono-trans, poly-cis decaprenyl phosphate biosynthesis	mono-trans, poly-cis decaprenyl phosphate biosynthesis	mono-trans, poly-cis decaprenyl phosphate biosynthesis	mono-trans, poly-cis decaprenyl phosphate biosynthesis	mono-trans, poly-cis decaprenyl phosphate biosynthesis	PWY-6383	mono-trans, poly-cis decaprenyl phosphate biosynthesis
Biosynthesis	Cofactor, Prosthetic Group, Electron Carrier, and Vitamin Biosynthesis	Polyprenyl Biosynthesis	nonaprenyl diphosphate biosynthesis I	nonaprenyl diphosphate biosynthesis I	nonaprenyl diphosphate biosynthesis I	nonaprenyl diphosphate biosynthesis I	nonaprenyl diphosphate biosynthesis I	PWY-5805	nonaprenyl diphosphate biosynthesis I
Biosynthesis	Cofactor, Prosthetic Group, Electron Carrier, and Vitamin Biosynthesis	Polyprenyl Biosynthesis	nonaprenyl diphosphate biosynthesis II	nonaprenyl diphosphate biosynthesis II	nonaprenyl diphosphate biosynthesis II	nonaprenyl diphosphate biosynthesis II	nonaprenyl diphosphate biosynthesis II	PWY-6520	nonaprenyl diphosphate biosynthesis II
Biosynthesis	Cofactor, Prosthetic Group, Electron Carrier, and Vitamin Biosynthesis	Polyprenyl Biosynthesis	octaprenyl diphosphate biosynthesis	octaprenyl diphosphate biosynthesis	octaprenyl diphosphate biosynthesis	octaprenyl diphosphate biosynthesis	octaprenyl diphosphate biosynthesis	PWY-5783	octaprenyl diphosphate biosynthesis
Biosynthesis	Cofactor, Prosthetic Group, Electron Carrier, and Vitamin Biosynthesis	Polyprenyl Biosynthesis	polyisoprenoid biosynthesis (E. coli)	polyisoprenoid biosynthesis (E. coli)	polyisoprenoid biosynthesis (E. coli)	polyisoprenoid biosynthesis (E. coli)	polyisoprenoid biosynthesis (E. coli)	POLYISOPRENSYN-PWY	polyisoprenoid biosynthesis (E. coli)
Biosynthesis	Cofactor, Prosthetic Group, Electron Carrier, and Vitamin Biosynthesis	Polyprenyl Biosynthesis	tridecaprenyl diphosphate biosynthesis	tridecaprenyl diphosphate biosynthesis	tridecaprenyl diphosphate biosynthesis	tridecaprenyl diphosphate biosynthesis	tridecaprenyl diphosphate biosynthesis	PWY-5893	tridecaprenyl diphosphate biosynthesis
Biosynthesis	Cofactor, Prosthetic Group, Electron Carrier, and Vitamin Biosynthesis	Porphyrin Compound Biosynthesis	Chlorophyll Biosynthesis	Chlorophyll a Biosynthesis	chlorophyll a biosynthesis I	chlorophyll a biosynthesis I	chlorophyll a biosynthesis I	PWY-5086	chlorophyll a biosynthesis I
Biosynthesis	Cofactor, Prosthetic Group, Electron Carrier, and Vitamin Biosynthesis	Porphyrin Compound Biosynthesis	Chlorophyll Biosynthesis	Chlorophyll a Biosynthesis	chlorophyll a biosynthesis II	chlorophyll a biosynthesis II	chlorophyll a biosynthesis II	PWY-5064	chlorophyll a biosynthesis II
Biosynthesis	Cofactor, Prosthetic Group, Electron Carrier, and Vitamin Biosynthesis	Porphyrin Compound Biosynthesis	Chlorophyll Biosynthesis	Chlorophyll a Biosynthesis	chlorophyll a biosynthesis III	chlorophyll a biosynthesis III	chlorophyll a biosynthesis III	PWY-7764	chlorophyll a biosynthesis III
Biosynthesis	Cofactor, Prosthetic Group, Electron Carrier, and Vitamin Biosynthesis	Porphyrin Compound Biosynthesis	Chlorophyll Biosynthesis	Chlorophyll a Biosynthesis	chlorophyll cycle	chlorophyll cycle	chlorophyll cycle	PWY-5068	chlorophyll cycle
Biosynthesis	Cofactor, Prosthetic Group, Electron Carrier, and Vitamin Biosynthesis	Porphyrin Compound Biosynthesis	Chlorophyll Biosynthesis	Chlorophyll a Biosynthesis	superpathway of bacteriochlorophyll a biosynthesis	superpathway of bacteriochlorophyll a biosynthesis	superpathway of bacteriochlorophyll a biosynthesis	PWY-5529	superpathway of bacteriochlorophyll a biosynthesis
Biosynthesis	Cofactor, Prosthetic Group, Electron Carrier, and Vitamin Biosynthesis	Porphyrin Compound Biosynthesis	Chlorophyll Biosynthesis	Chlorophyllide a Biosynthesis	3,8-divinyl-chlorophyllide a biosynthesis I (aerobic, light-dependent)	3,8-divinyl-chlorophyllide a biosynthesis I (aerobic, light-dependent)	3,8-divinyl-chlorophyllide a biosynthesis I (aerobic, light-dependent)	CHLOROPHYLL-SYN	3,8-divinyl-chlorophyllide a biosynthesis I (aerobic, light-dependent)
Biosynthesis	Cofactor, Prosthetic Group, Electron Carrier, and Vitamin Biosynthesis	Porphyrin Compound Biosynthesis	Chlorophyll Biosynthesis	Chlorophyllide a Biosynthesis	3,8-divinyl-chlorophyllide a biosynthesis II (anaerobic)	3,8-divinyl-chlorophyllide a biosynthesis II (anaerobic)	3,8-divinyl-chlorophyllide a biosynthesis II (anaerobic)	PWY-5531	3,8-divinyl-chlorophyllide a biosynthesis II (anaerobic)
Biosynthesis	Cofactor, Prosthetic Group, Electron Carrier, and Vitamin Biosynthesis	Porphyrin Compound Biosynthesis	Chlorophyll Biosynthesis	Chlorophyllide a Biosynthesis	3,8-divinyl-chlorophyllide a biosynthesis III (aerobic, light independent)	3,8-divinyl-chlorophyllide a biosynthesis III (aerobic, light independent)	3,8-divinyl-chlorophyllide a biosynthesis III (aerobic, light independent)	PWY-7159	3,8-divinyl-chlorophyllide a biosynthesis III (aerobic, light independent)
Biosynthesis	Cofactor, Prosthetic Group, Electron Carrier, and Vitamin Biosynthesis	Porphyrin Compound Biosynthesis	Chlorophyll Biosynthesis	bacteriochlorophyll a biosynthesis	bacteriochlorophyll a biosynthesis	bacteriochlorophyll a biosynthesis	bacteriochlorophyll a biosynthesis	PWY-5526	bacteriochlorophyll a biosynthesis
Biosynthesis	Cofactor, Prosthetic Group, Electron Carrier, and Vitamin Biosynthesis	Porphyrin Compound Biosynthesis	Chlorophyll Biosynthesis	bacteriochlorophyll b biosynthesis	bacteriochlorophyll b biosynthesis	bacteriochlorophyll b biosynthesis	bacteriochlorophyll b biosynthesis	PWY-7762	bacteriochlorophyll b biosynthesis
Biosynthesis	Cofactor, Prosthetic Group, Electron Carrier, and Vitamin Biosynthesis	Porphyrin Compound Biosynthesis	Chlorophyll Biosynthesis	bacteriochlorophyll c biosynthesis	bacteriochlorophyll c biosynthesis	bacteriochlorophyll c biosynthesis	bacteriochlorophyll c biosynthesis	PWY-7759	bacteriochlorophyll c biosynthesis
Biosynthesis	Cofactor, Prosthetic Group, Electron Carrier, and Vitamin Biosynthesis	Porphyrin Compound Biosynthesis	Chlorophyll Biosynthesis	bacteriochlorophyll d biosynthesis	bacteriochlorophyll d biosynthesis	bacteriochlorophyll d biosynthesis	bacteriochlorophyll d biosynthesis	PWY-7758	bacteriochlorophyll d biosynthesis
Biosynthesis	Cofactor, Prosthetic Group, Electron Carrier, and Vitamin Biosynthesis	Porphyrin Compound Biosynthesis	Chlorophyll Biosynthesis	bacteriochlorophyll e biosynthesis	bacteriochlorophyll e biosynthesis	bacteriochlorophyll e biosynthesis	bacteriochlorophyll e biosynthesis	PWY-7760	bacteriochlorophyll e biosynthesis
Biosynthesis	Cofactor, Prosthetic Group, Electron Carrier, and Vitamin Biosynthesis	Porphyrin Compound Biosynthesis	Heme Biosynthesis	Heme b Biosynthesis	heme b biosynthesis I (aerobic)	heme b biosynthesis I (aerobic)	heme b biosynthesis I (aerobic)	HEME-BIOSYNTHESIS-II	heme b biosynthesis I (aerobic)
Biosynthesis	Cofactor, Prosthetic Group, Electron Carrier, and Vitamin Biosynthesis	Porphyrin Compound Biosynthesis	Heme Biosynthesis	Heme b Biosynthesis	heme b biosynthesis II (oxygen-independent)	heme b biosynthesis II (oxygen-independent)	heme b biosynthesis II (oxygen-independent)	HEMESYN2-PWY	heme b biosynthesis II (oxygen-independent)
Biosynthesis	Cofactor, Prosthetic Group, Electron Carrier, and Vitamin Biosynthesis	Porphyrin Compound Biosynthesis	Heme Biosynthesis	Heme b Biosynthesis	heme b biosynthesis III (from siroheme)	heme b biosynthesis III (from siroheme)	heme b biosynthesis III (from siroheme)	PWY-7552	heme b biosynthesis III (from siroheme)
Biosynthesis	Cofactor, Prosthetic Group, Electron Carrier, and Vitamin Biosynthesis	Porphyrin Compound Biosynthesis	Heme Biosynthesis	Heme b Biosynthesis	heme b biosynthesis IV (Gram-positive bacteria)	heme b biosynthesis IV (Gram-positive bacteria)	heme b biosynthesis IV (Gram-positive bacteria)	PWY-7766	heme b biosynthesis IV (Gram-positive bacteria)
Biosynthesis	Cofactor, Prosthetic Group, Electron Carrier, and Vitamin Biosynthesis	Porphyrin Compound Biosynthesis	Heme Biosynthesis	Heme b Biosynthesis	superpathway of heme b biosynthesis from glutamate	superpathway of heme b biosynthesis from glutamate	superpathway of heme b biosynthesis from glutamate	PWY-5918	superpathway of heme b biosynthesis from glutamate
Biosynthesis	Cofactor, Prosthetic Group, Electron Carrier, and Vitamin Biosynthesis	Porphyrin Compound Biosynthesis	Heme Biosynthesis	Heme b Biosynthesis	superpathway of heme b biosynthesis from glycine	superpathway of heme b biosynthesis from glycine	superpathway of heme b biosynthesis from glycine	PWY-5920	superpathway of heme b biosynthesis from glycine
Biosynthesis	Cofactor, Prosthetic Group, Electron Carrier, and Vitamin Biosynthesis	Porphyrin Compound Biosynthesis	Heme Biosynthesis	Heme b Biosynthesis	superpathway of heme b biosynthesis from uroporphyrinogen-III	superpathway of heme b biosynthesis from uroporphyrinogen-III	superpathway of heme b biosynthesis from uroporphyrinogen-III	PWY0-1415	superpathway of heme b biosynthesis from uroporphyrinogen-III
Biosynthesis	Cofactor, Prosthetic Group, Electron Carrier, and Vitamin Biosynthesis	Porphyrin Compound Biosynthesis	Heme Biosynthesis	heme a biosynthesis	heme a biosynthesis	heme a biosynthesis	heme a biosynthesis	PWY-7856	heme a biosynthesis
Biosynthesis	Cofactor, Prosthetic Group, Electron Carrier, and Vitamin Biosynthesis	Porphyrin Compound Biosynthesis	Heme Biosynthesis	heme d1 biosynthesis	heme d1 biosynthesis	heme d1 biosynthesis	heme d1 biosynthesis	PWY-7554	heme d1 biosynthesis
Biosynthesis	Cofactor, Prosthetic Group, Electron Carrier, and Vitamin Biosynthesis	Porphyrin Compound Biosynthesis	siroheme amide biosynthesis	siroheme amide biosynthesis	siroheme amide biosynthesis	siroheme amide biosynthesis	siroheme amide biosynthesis	PWY-5297	siroheme amide biosynthesis
Biosynthesis	Cofactor, Prosthetic Group, Electron Carrier, and Vitamin Biosynthesis	Porphyrin Compound Biosynthesis	siroheme biosynthesis	siroheme biosynthesis	siroheme biosynthesis	siroheme biosynthesis	siroheme biosynthesis	PWY-5194	siroheme biosynthesis
Biosynthesis	Cofactor, Prosthetic Group, Electron Carrier, and Vitamin Biosynthesis	Quinol and Quinone Biosynthesis	1,4-Dihydroxy-2-Naphthoate Biosynthesis	2-carboxy-1,4-naphthoquinol biosynthesis	2-carboxy-1,4-naphthoquinol biosynthesis	2-carboxy-1,4-naphthoquinol biosynthesis	2-carboxy-1,4-naphthoquinol biosynthesis	PWY-5837	2-carboxy-1,4-naphthoquinol biosynthesis
Biosynthesis	Cofactor, Prosthetic Group, Electron Carrier, and Vitamin Biosynthesis	Quinol and Quinone Biosynthesis	1,4-dihydroxy-6-naphthoate biosynthesis	1,4-dihydroxy-6-naphthoate biosynthesis I	1,4-dihydroxy-6-naphthoate biosynthesis I	1,4-dihydroxy-6-naphthoate biosynthesis I	1,4-dihydroxy-6-naphthoate biosynthesis I	PWY-7374	1,4-dihydroxy-6-naphthoate biosynthesis I
Biosynthesis	Cofactor, Prosthetic Group, Electron Carrier, and Vitamin Biosynthesis	Quinol and Quinone Biosynthesis	1,4-dihydroxy-6-naphthoate biosynthesis	1,4-dihydroxy-6-naphthoate biosynthesis II	1,4-dihydroxy-6-naphthoate biosynthesis II	1,4-dihydroxy-6-naphthoate biosynthesis II	1,4-dihydroxy-6-naphthoate biosynthesis II	PWY-7371	1,4-dihydroxy-6-naphthoate biosynthesis II
Biosynthesis	Cofactor, Prosthetic Group, Electron Carrier, and Vitamin Biosynthesis	Quinol and Quinone Biosynthesis	Demethylmenaquinol Biosynthesis	Demethylmenaquinol-6 Biosynthesis	demethylmenaquinol-4 biosynthesis	demethylmenaquinol-4 biosynthesis	demethylmenaquinol-4 biosynthesis	PWY-7997	demethylmenaquinol-4 biosynthesis
Biosynthesis	Cofactor, Prosthetic Group, Electron Carrier, and Vitamin Biosynthesis	Quinol and Quinone Biosynthesis	Demethylmenaquinol Biosynthesis	Demethylmenaquinol-6 Biosynthesis	demethylmenaquinol-6 biosynthesis I	demethylmenaquinol-6 biosynthesis I	demethylmenaquinol-6 biosynthesis I	PWY-5853	demethylmenaquinol-6 biosynthesis I
Biosynthesis	Cofactor, Prosthetic Group, Electron Carrier, and Vitamin Biosynthesis	Quinol and Quinone Biosynthesis	Demethylmenaquinol Biosynthesis	Demethylmenaquinol-6 Biosynthesis	demethylmenaquinol-6 biosynthesis II	demethylmenaquinol-6 biosynthesis II	demethylmenaquinol-6 biosynthesis II	PWY-7372	demethylmenaquinol-6 biosynthesis II
Biosynthesis	Cofactor, Prosthetic Group, Electron Carrier, and Vitamin Biosynthesis	Quinol and Quinone Biosynthesis	Demethylmenaquinol Biosynthesis	Demethylmenaquinol-6 Biosynthesis	superpathway of demethylmenaquinol-6 biosynthesis I	superpathway of demethylmenaquinol-6 biosynthesis I	superpathway of demethylmenaquinol-6 biosynthesis I	PWY-5860	superpathway of demethylmenaquinol-6 biosynthesis I
Biosynthesis	Cofactor, Prosthetic Group, Electron Carrier, and Vitamin Biosynthesis	Quinol and Quinone Biosynthesis	Demethylmenaquinol Biosynthesis	Demethylmenaquinol-6 Biosynthesis	superpathway of demethylmenaquinol-6 biosynthesis II	superpathway of demethylmenaquinol-6 biosynthesis II	superpathway of demethylmenaquinol-6 biosynthesis II	PWY-7373	superpathway of demethylmenaquinol-6 biosynthesis II
Biosynthesis	Cofactor, Prosthetic Group, Electron Carrier, and Vitamin Biosynthesis	Quinol and Quinone Biosynthesis	Demethylmenaquinol Biosynthesis	Demethylmenaquinol-8 Biosynthesis	demethylmenaquinol-8 biosynthesis I	demethylmenaquinol-8 biosynthesis I	demethylmenaquinol-8 biosynthesis I	PWY-5852	demethylmenaquinol-8 biosynthesis I
Biosynthesis	Cofactor, Prosthetic Group, Electron Carrier, and Vitamin Biosynthesis	Quinol and Quinone Biosynthesis	Demethylmenaquinol Biosynthesis	Demethylmenaquinol-8 Biosynthesis	demethylmenaquinol-8 biosynthesis II	demethylmenaquinol-8 biosynthesis II	demethylmenaquinol-8 biosynthesis II	PWY-6262	demethylmenaquinol-8 biosynthesis II
Biosynthesis	Cofactor, Prosthetic Group, Electron Carrier, and Vitamin Biosynthesis	Quinol and Quinone Biosynthesis	Demethylmenaquinol Biosynthesis	Demethylmenaquinol-8 Biosynthesis	superpathway of demethylmenaquinol-8 biosynthesis I	superpathway of demethylmenaquinol-8 biosynthesis I	superpathway of demethylmenaquinol-8 biosynthesis I	PWY-5861	superpathway of demethylmenaquinol-8 biosynthesis I
Biosynthesis	Cofactor, Prosthetic Group, Electron Carrier, and Vitamin Biosynthesis	Quinol and Quinone Biosynthesis	Demethylmenaquinol Biosynthesis	demethylmenaquinol-9 biosynthesis	demethylmenaquinol-9 biosynthesis	demethylmenaquinol-9 biosynthesis	demethylmenaquinol-9 biosynthesis	PWY-5851	demethylmenaquinol-9 biosynthesis
Biosynthesis	Cofactor, Prosthetic Group, Electron Carrier, and Vitamin Biosynthesis	Quinol and Quinone Biosynthesis	Demethylmenaquinol Biosynthesis	superpathway of demethylmenaquinol-9 biosynthesis	superpathway of demethylmenaquinol-9 biosynthesis	superpathway of demethylmenaquinol-9 biosynthesis	superpathway of demethylmenaquinol-9 biosynthesis	PWY-5862	superpathway of demethylmenaquinol-9 biosynthesis
Biosynthesis	Cofactor, Prosthetic Group, Electron Carrier, and Vitamin Biosynthesis	Quinol and Quinone Biosynthesis	Menaquinol Biosynthesis	menaquinol-4 biosynthesis I	menaquinol-4 biosynthesis I	menaquinol-4 biosynthesis I	menaquinol-4 biosynthesis I	PWY-7996	menaquinol-4 biosynthesis I
Biosynthesis	Cofactor, Prosthetic Group, Electron Carrier, and Vitamin Biosynthesis	Quinol and Quinone Biosynthesis	Menaquinol Biosynthesis	menaquinol-4 biosynthesis II	menaquinol-4 biosynthesis II	menaquinol-4 biosynthesis II	menaquinol-4 biosynthesis II	PWY-7998	menaquinol-4 biosynthesis II
Biosynthesis	Cofactor, Prosthetic Group, Electron Carrier, and Vitamin Biosynthesis	Quinol and Quinone Biosynthesis	Menaquinol Biosynthesis	menaquinol-6 biosynthesis	menaquinol-6 biosynthesis	menaquinol-6 biosynthesis	menaquinol-6 biosynthesis	PWY-5849	menaquinol-6 biosynthesis
Biosynthesis	Cofactor, Prosthetic Group, Electron Carrier, and Vitamin Biosynthesis	Quinol and Quinone Biosynthesis	Menaquinol Biosynthesis	menaquinol-7 biosynthesis	menaquinol-7 biosynthesis	menaquinol-7 biosynthesis	menaquinol-7 biosynthesis	PWY-5839	menaquinol-7 biosynthesis
Biosynthesis	Cofactor, Prosthetic Group, Electron Carrier, and Vitamin Biosynthesis	Quinol and Quinone Biosynthesis	Menaquinol Biosynthesis	menaquinol-8 biosynthesis	menaquinol-8 biosynthesis	menaquinol-8 biosynthesis	menaquinol-8 biosynthesis	MENAQUINONESYN-PWY	menaquinol-8 biosynthesis
Biosynthesis	Cofactor, Prosthetic Group, Electron Carrier, and Vitamin Biosynthesis	Quinol and Quinone Biosynthesis	Menaquinol Biosynthesis	menaquinol-9 biosynthesis	menaquinol-9 biosynthesis	menaquinol-9 biosynthesis	menaquinol-9 biosynthesis	PWY-5844	menaquinol-9 biosynthesis
Biosynthesis	Cofactor, Prosthetic Group, Electron Carrier, and Vitamin Biosynthesis	Quinol and Quinone Biosynthesis	Menaquinol Biosynthesis	menaquinol-10 biosynthesis	menaquinol-10 biosynthesis	menaquinol-10 biosynthesis	menaquinol-10 biosynthesis	PWY-5890	menaquinol-10 biosynthesis
Biosynthesis	Cofactor, Prosthetic Group, Electron Carrier, and Vitamin Biosynthesis	Quinol and Quinone Biosynthesis	Menaquinol Biosynthesis	menaquinol-11 biosynthesis	menaquinol-11 biosynthesis	menaquinol-11 biosynthesis	menaquinol-11 biosynthesis	PWY-5891	menaquinol-11 biosynthesis
Biosynthesis	Cofactor, Prosthetic Group, Electron Carrier, and Vitamin Biosynthesis	Quinol and Quinone Biosynthesis	Menaquinol Biosynthesis	menaquinol-12 biosynthesis	menaquinol-12 biosynthesis	menaquinol-12 biosynthesis	menaquinol-12 biosynthesis	PWY-5892	menaquinol-12 biosynthesis
Biosynthesis	Cofactor, Prosthetic Group, Electron Carrier, and Vitamin Biosynthesis	Quinol and Quinone Biosynthesis	Menaquinol Biosynthesis	menaquinol-13 biosynthesis	menaquinol-13 biosynthesis	menaquinol-13 biosynthesis	menaquinol-13 biosynthesis	PWY-5895	menaquinol-13 biosynthesis
Biosynthesis	Cofactor, Prosthetic Group, Electron Carrier, and Vitamin Biosynthesis	Quinol and Quinone Biosynthesis	Menaquinol Biosynthesis	superpathway of menaquinol-6 biosynthesis I	superpathway of menaquinol-6 biosynthesis I	superpathway of menaquinol-6 biosynthesis I	superpathway of menaquinol-6 biosynthesis I	PWY-5850	superpathway of menaquinol-6 biosynthesis I
Biosynthesis	Cofactor, Prosthetic Group, Electron Carrier, and Vitamin Biosynthesis	Quinol and Quinone Biosynthesis	Menaquinol Biosynthesis	superpathway of menaquinol-7 biosynthesis	superpathway of menaquinol-7 biosynthesis	superpathway of menaquinol-7 biosynthesis	superpathway of menaquinol-7 biosynthesis	PWY-5840	superpathway of menaquinol-7 biosynthesis
Biosynthesis	Cofactor, Prosthetic Group, Electron Carrier, and Vitamin Biosynthesis	Quinol and Quinone Biosynthesis	Menaquinol Biosynthesis	superpathway of menaquinol-8 biosynthesis I	superpathway of menaquinol-8 biosynthesis I	superpathway of menaquinol-8 biosynthesis I	superpathway of menaquinol-8 biosynthesis I	PWY-5838	superpathway of menaquinol-8 biosynthesis I
Biosynthesis	Cofactor, Prosthetic Group, Electron Carrier, and Vitamin Biosynthesis	Quinol and Quinone Biosynthesis	Menaquinol Biosynthesis	superpathway of menaquinol-8 biosynthesis II	superpathway of menaquinol-8 biosynthesis II	superpathway of menaquinol-8 biosynthesis II	superpathway of menaquinol-8 biosynthesis II	PWY-6263	superpathway of menaquinol-8 biosynthesis II
Biosynthesis	Cofactor, Prosthetic Group, Electron Carrier, and Vitamin Biosynthesis	Quinol and Quinone Biosynthesis	Menaquinol Biosynthesis	superpathway of menaquinol-8 biosynthesis III	superpathway of menaquinol-8 biosynthesis III	superpathway of menaquinol-8 biosynthesis III	superpathway of menaquinol-8 biosynthesis III	PWY-7992	superpathway of menaquinol-8 biosynthesis III
Biosynthesis	Cofactor, Prosthetic Group, Electron Carrier, and Vitamin Biosynthesis	Quinol and Quinone Biosynthesis	Menaquinol Biosynthesis	superpathway of menaquinol-9 biosynthesis	superpathway of menaquinol-9 biosynthesis	superpathway of menaquinol-9 biosynthesis	superpathway of menaquinol-9 biosynthesis	PWY-5845	superpathway of menaquinol-9 biosynthesis
Biosynthesis	Cofactor, Prosthetic Group, Electron Carrier, and Vitamin Biosynthesis	Quinol and Quinone Biosynthesis	Menaquinol Biosynthesis	superpathway of menaquinol-10 biosynthesis	superpathway of menaquinol-10 biosynthesis	superpathway of menaquinol-10 biosynthesis	superpathway of menaquinol-10 biosynthesis	PWY-5896	superpathway of menaquinol-10 biosynthesis
Biosynthesis	Cofactor, Prosthetic Group, Electron Carrier, and Vitamin Biosynthesis	Quinol and Quinone Biosynthesis	Menaquinol Biosynthesis	superpathway of menaquinol-11 biosynthesis	superpathway of menaquinol-11 biosynthesis	superpathway of menaquinol-11 biosynthesis	superpathway of menaquinol-11 biosynthesis	PWY-5897	superpathway of menaquinol-11 biosynthesis
Biosynthesis	Cofactor, Prosthetic Group, Electron Carrier, and Vitamin Biosynthesis	Quinol and Quinone Biosynthesis	Menaquinol Biosynthesis	superpathway of menaquinol-12 biosynthesis	superpathway of menaquinol-12 biosynthesis	superpathway of menaquinol-12 biosynthesis	superpathway of menaquinol-12 biosynthesis	PWY-5898	superpathway of menaquinol-12 biosynthesis
Biosynthesis	Cofactor, Prosthetic Group, Electron Carrier, and Vitamin Biosynthesis	Quinol and Quinone Biosynthesis	Menaquinol Biosynthesis	superpathway of menaquinol-13 biosynthesis	superpathway of menaquinol-13 biosynthesis	superpathway of menaquinol-13 biosynthesis	superpathway of menaquinol-13 biosynthesis	PWY-5899	superpathway of menaquinol-13 biosynthesis
Biosynthesis	Cofactor, Prosthetic Group, Electron Carrier, and Vitamin Biosynthesis	Quinol and Quinone Biosynthesis	Phylloquinol Biosynthesis	phylloquinol biosynthesis	phylloquinol biosynthesis	phylloquinol biosynthesis	phylloquinol biosynthesis	PWY-5027	phylloquinol biosynthesis
Biosynthesis	Cofactor, Prosthetic Group, Electron Carrier, and Vitamin Biosynthesis	Quinol and Quinone Biosynthesis	Phylloquinol Biosynthesis	superpathway of phylloquinol biosynthesis	superpathway of phylloquinol biosynthesis	superpathway of phylloquinol biosynthesis	superpathway of phylloquinol biosynthesis	PWY-5863	superpathway of phylloquinol biosynthesis
Biosynthesis	Cofactor, Prosthetic Group, Electron Carrier, and Vitamin Biosynthesis	Quinol and Quinone Biosynthesis	Plastoquinol Biosynthesis	plastoquinol-9 biosynthesis I	plastoquinol-9 biosynthesis I	plastoquinol-9 biosynthesis I	plastoquinol-9 biosynthesis I	PWY-1581	plastoquinol-9 biosynthesis I
Biosynthesis	Cofactor, Prosthetic Group, Electron Carrier, and Vitamin Biosynthesis	Quinol and Quinone Biosynthesis	Plastoquinol Biosynthesis	plastoquinol-9 biosynthesis II	plastoquinol-9 biosynthesis II	plastoquinol-9 biosynthesis II	plastoquinol-9 biosynthesis II	PWY-6978	plastoquinol-9 biosynthesis II
Biosynthesis	Cofactor, Prosthetic Group, Electron Carrier, and Vitamin Biosynthesis	Quinol and Quinone Biosynthesis	Plastoquinol Biosynthesis	superpathway of plastoquinol biosynthesis	superpathway of plastoquinol biosynthesis	superpathway of plastoquinol biosynthesis	superpathway of plastoquinol biosynthesis	PWY-5864	superpathway of plastoquinol biosynthesis
Biosynthesis	Cofactor, Prosthetic Group, Electron Carrier, and Vitamin Biosynthesis	Quinol and Quinone Biosynthesis	Rhodoquinone Biosynthesis	rhodoquinone-9 biosynthesis	rhodoquinone-9 biosynthesis	rhodoquinone-9 biosynthesis	rhodoquinone-9 biosynthesis	PWY-5889	rhodoquinone-9 biosynthesis
Biosynthesis	Cofactor, Prosthetic Group, Electron Carrier, and Vitamin Biosynthesis	Quinol and Quinone Biosynthesis	Rhodoquinone Biosynthesis	rhodoquinone-10 biosynthesis	rhodoquinone-10 biosynthesis	rhodoquinone-10 biosynthesis	rhodoquinone-10 biosynthesis	PWY-5888	rhodoquinone-10 biosynthesis
Biosynthesis	Cofactor, Prosthetic Group, Electron Carrier, and Vitamin Biosynthesis	Quinol and Quinone Biosynthesis	Ubiquinol Biosynthesis	superpathway of ubiquinol-6 biosynthesis (eukaryotic)	superpathway of ubiquinol-6 biosynthesis (eukaryotic)	superpathway of ubiquinol-6 biosynthesis (eukaryotic)	superpathway of ubiquinol-6 biosynthesis (eukaryotic)	PWY-7235	superpathway of ubiquinol-6 biosynthesis (eukaryotic)
Biosynthesis	Cofactor, Prosthetic Group, Electron Carrier, and Vitamin Biosynthesis	Quinol and Quinone Biosynthesis	Ubiquinol Biosynthesis	superpathway of ubiquinol-8 biosynthesis (prokaryotic)	superpathway of ubiquinol-8 biosynthesis (prokaryotic)	superpathway of ubiquinol-8 biosynthesis (prokaryotic)	superpathway of ubiquinol-8 biosynthesis (prokaryotic)	UBISYN-PWY	superpathway of ubiquinol-8 biosynthesis (prokaryotic)
Biosynthesis	Cofactor, Prosthetic Group, Electron Carrier, and Vitamin Biosynthesis	Quinol and Quinone Biosynthesis	Ubiquinol Biosynthesis	ubiquinol-6 biosynthesis from 4-aminobenzoate (yeast)	ubiquinol-6 biosynthesis from 4-aminobenzoate (yeast)	ubiquinol-6 biosynthesis from 4-aminobenzoate (yeast)	ubiquinol-6 biosynthesis from 4-aminobenzoate (yeast)	PWY-7230	ubiquinol-6 biosynthesis from 4-aminobenzoate (yeast)
Biosynthesis	Cofactor, Prosthetic Group, Electron Carrier, and Vitamin Biosynthesis	Quinol and Quinone Biosynthesis	Ubiquinol Biosynthesis	ubiquinol-6 biosynthesis from 4-hydroxybenzoate (eukaryotic)	ubiquinol-6 biosynthesis from 4-hydroxybenzoate (eukaryotic)	ubiquinol-6 biosynthesis from 4-hydroxybenzoate (eukaryotic)	ubiquinol-6 biosynthesis from 4-hydroxybenzoate (eukaryotic)	PWY3O-19	ubiquinol-6 biosynthesis from 4-hydroxybenzoate (eukaryotic)
Biosynthesis	Cofactor, Prosthetic Group, Electron Carrier, and Vitamin Biosynthesis	Quinol and Quinone Biosynthesis	Ubiquinol Biosynthesis	ubiquinol-6 bypass biosynthesis (eukaryotic)	ubiquinol-6 bypass biosynthesis (eukaryotic)	ubiquinol-6 bypass biosynthesis (eukaryotic)	ubiquinol-6 bypass biosynthesis (eukaryotic)	PWY-7233	ubiquinol-6 bypass biosynthesis (eukaryotic)
Biosynthesis	Cofactor, Prosthetic Group, Electron Carrier, and Vitamin Biosynthesis	Quinol and Quinone Biosynthesis	Ubiquinol Biosynthesis	ubiquinol-7 biosynthesis (eukaryotic)	ubiquinol-7 biosynthesis (eukaryotic)	ubiquinol-7 biosynthesis (eukaryotic)	ubiquinol-7 biosynthesis (eukaryotic)	PWY-5873	ubiquinol-7 biosynthesis (eukaryotic)
Biosynthesis	Cofactor, Prosthetic Group, Electron Carrier, and Vitamin Biosynthesis	Quinol and Quinone Biosynthesis	Ubiquinol Biosynthesis	ubiquinol-7 biosynthesis (prokaryotic)	ubiquinol-7 biosynthesis (prokaryotic)	ubiquinol-7 biosynthesis (prokaryotic)	ubiquinol-7 biosynthesis (prokaryotic)	PWY-5855	ubiquinol-7 biosynthesis (prokaryotic)
Biosynthesis	Cofactor, Prosthetic Group, Electron Carrier, and Vitamin Biosynthesis	Quinol and Quinone Biosynthesis	Ubiquinol Biosynthesis	ubiquinol-8 biosynthesis (eukaryotic)	ubiquinol-8 biosynthesis (eukaryotic)	ubiquinol-8 biosynthesis (eukaryotic)	ubiquinol-8 biosynthesis (eukaryotic)	PWY-5870	ubiquinol-8 biosynthesis (eukaryotic)
Biosynthesis	Cofactor, Prosthetic Group, Electron Carrier, and Vitamin Biosynthesis	Quinol and Quinone Biosynthesis	Ubiquinol Biosynthesis	ubiquinol-8 biosynthesis (prokaryotic)	ubiquinol-8 biosynthesis (prokaryotic)	ubiquinol-8 biosynthesis (prokaryotic)	ubiquinol-8 biosynthesis (prokaryotic)	PWY-6708	ubiquinol-8 biosynthesis (prokaryotic)
Biosynthesis	Cofactor, Prosthetic Group, Electron Carrier, and Vitamin Biosynthesis	Quinol and Quinone Biosynthesis	Ubiquinol Biosynthesis	ubiquinol-9 biosynthesis (eukaryotic)	ubiquinol-9 biosynthesis (eukaryotic)	ubiquinol-9 biosynthesis (eukaryotic)	ubiquinol-9 biosynthesis (eukaryotic)	PWY-5871	ubiquinol-9 biosynthesis (eukaryotic)
Biosynthesis	Cofactor, Prosthetic Group, Electron Carrier, and Vitamin Biosynthesis	Quinol and Quinone Biosynthesis	Ubiquinol Biosynthesis	ubiquinol-9 biosynthesis (prokaryotic)	ubiquinol-9 biosynthesis (prokaryotic)	ubiquinol-9 biosynthesis (prokaryotic)	ubiquinol-9 biosynthesis (prokaryotic)	PWY-5856	ubiquinol-9 biosynthesis (prokaryotic)
Biosynthesis	Cofactor, Prosthetic Group, Electron Carrier, and Vitamin Biosynthesis	Quinol and Quinone Biosynthesis	Ubiquinol Biosynthesis	ubiquinol-10 biosynthesis (eukaryotic)	ubiquinol-10 biosynthesis (eukaryotic)	ubiquinol-10 biosynthesis (eukaryotic)	ubiquinol-10 biosynthesis (eukaryotic)	PWY-5872	ubiquinol-10 biosynthesis (eukaryotic)
Biosynthesis	Cofactor, Prosthetic Group, Electron Carrier, and Vitamin Biosynthesis	Quinol and Quinone Biosynthesis	Ubiquinol Biosynthesis	ubiquinol-10 biosynthesis (prokaryotic)	ubiquinol-10 biosynthesis (prokaryotic)	ubiquinol-10 biosynthesis (prokaryotic)	ubiquinol-10 biosynthesis (prokaryotic)	PWY-5857	ubiquinol-10 biosynthesis (prokaryotic)
Biosynthesis	Cofactor, Prosthetic Group, Electron Carrier, and Vitamin Biosynthesis	Quinol and Quinone Biosynthesis	β-dihydromenaquinone-9 biosynthesis	β-dihydromenaquinone-9 biosynthesis	β-dihydromenaquinone-9 biosynthesis	β-dihydromenaquinone-9 biosynthesis	β-dihydromenaquinone-9 biosynthesis	PWY-7993	β-dihydromenaquinone-9 biosynthesis
Biosynthesis	Cofactor, Prosthetic Group, Electron Carrier, and Vitamin Biosynthesis	Quinol and Quinone Biosynthesis	ω-sulfo-II-dihydromenaquinone-9 biosynthesis	ω-sulfo-II-dihydromenaquinone-9 biosynthesis	ω-sulfo-II-dihydromenaquinone-9 biosynthesis	ω-sulfo-II-dihydromenaquinone-9 biosynthesis	ω-sulfo-II-dihydromenaquinone-9 biosynthesis	PWY-7781	ω-sulfo-II-dihydromenaquinone-9 biosynthesis
Biosynthesis	Cofactor, Prosthetic Group, Electron Carrier, and Vitamin Biosynthesis	Quinol and Quinone Biosynthesis	8-methylmenaquinone biosynthesis	8-methylmenaquinone biosynthesis	8-methylmenaquinone biosynthesis	8-methylmenaquinone biosynthesis	8-methylmenaquinone biosynthesis	PWY-7864	8-methylmenaquinone biosynthesis
Biosynthesis	Cofactor, Prosthetic Group, Electron Carrier, and Vitamin Biosynthesis	Quinol and Quinone Biosynthesis	vitamin E biosynthesis (tocopherols)	vitamin E biosynthesis (tocopherols)	vitamin E biosynthesis (tocopherols)	vitamin E biosynthesis (tocopherols)	vitamin E biosynthesis (tocopherols)	PWY-1422	vitamin E biosynthesis (tocopherols)
Biosynthesis	Cofactor, Prosthetic Group, Electron Carrier, and Vitamin Biosynthesis	Quinol and Quinone Biosynthesis	vitamin E biosynthesis (tocotrienols)	vitamin E biosynthesis (tocotrienols)	vitamin E biosynthesis (tocotrienols)	vitamin E biosynthesis (tocotrienols)	vitamin E biosynthesis (tocotrienols)	PWY-7436	vitamin E biosynthesis (tocotrienols)
Biosynthesis	Cofactor, Prosthetic Group, Electron Carrier, and Vitamin Biosynthesis	Reductant Biosynthesis	γ-glutamyl cycle	γ-glutamyl cycle	γ-glutamyl cycle	γ-glutamyl cycle	γ-glutamyl cycle	PWY-4041	γ-glutamyl cycle
Biosynthesis	Cofactor, Prosthetic Group, Electron Carrier, and Vitamin Biosynthesis	Reductant Biosynthesis	bacillithiol biosynthesis	bacillithiol biosynthesis	bacillithiol biosynthesis	bacillithiol biosynthesis	bacillithiol biosynthesis	PWY8J2-1	bacillithiol biosynthesis
Biosynthesis	Cofactor, Prosthetic Group, Electron Carrier, and Vitamin Biosynthesis	Reductant Biosynthesis	glutathione amide metabolism	glutathione amide metabolism	glutathione amide metabolism	glutathione amide metabolism	glutathione amide metabolism	PWY-4181	glutathione amide metabolism
Biosynthesis	Cofactor, Prosthetic Group, Electron Carrier, and Vitamin Biosynthesis	Reductant Biosynthesis	glutathione biosynthesis	glutathione biosynthesis	glutathione biosynthesis	glutathione biosynthesis	glutathione biosynthesis	GLUTATHIONESYN-PWY	glutathione biosynthesis
Biosynthesis	Cofactor, Prosthetic Group, Electron Carrier, and Vitamin Biosynthesis	Reductant Biosynthesis	glutathione-glutaredoxin redox reactions	glutathione-glutaredoxin redox reactions	glutathione-glutaredoxin redox reactions	glutathione-glutaredoxin redox reactions	glutathione-glutaredoxin redox reactions	GLUT-REDOX-PWY	glutathione-glutaredoxin redox reactions
Biosynthesis	Cofactor, Prosthetic Group, Electron Carrier, and Vitamin Biosynthesis	Reductant Biosynthesis	glutathione-peroxide redox reactions	glutathione-peroxide redox reactions	glutathione-peroxide redox reactions	glutathione-peroxide redox reactions	glutathione-peroxide redox reactions	PWY-4081	glutathione-peroxide redox reactions
Biosynthesis	Cofactor, Prosthetic Group, Electron Carrier, and Vitamin Biosynthesis	Reductant Biosynthesis	glutathionylspermidine biosynthesis	glutathionylspermidine biosynthesis	glutathionylspermidine biosynthesis	glutathionylspermidine biosynthesis	glutathionylspermidine biosynthesis	PWY-4121	glutathionylspermidine biosynthesis
Biosynthesis	Cofactor, Prosthetic Group, Electron Carrier, and Vitamin Biosynthesis	Reductant Biosynthesis	homoglutathione biosynthesis	homoglutathione biosynthesis	homoglutathione biosynthesis	homoglutathione biosynthesis	homoglutathione biosynthesis	PWY-6840	homoglutathione biosynthesis
Biosynthesis	Cofactor, Prosthetic Group, Electron Carrier, and Vitamin Biosynthesis	Reductant Biosynthesis	mycothiol biosynthesis	mycothiol biosynthesis	mycothiol biosynthesis	mycothiol biosynthesis	mycothiol biosynthesis	PWY1G-0	mycothiol biosynthesis
Biosynthesis	Cofactor, Prosthetic Group, Electron Carrier, and Vitamin Biosynthesis	Reductant Biosynthesis	mycothiol oxidation	mycothiol oxidation	mycothiol oxidation	mycothiol oxidation	mycothiol oxidation	PWY1G-126	mycothiol oxidation
Biosynthesis	Cofactor, Prosthetic Group, Electron Carrier, and Vitamin Biosynthesis	Reductant Biosynthesis	thioredoxin pathway	thioredoxin pathway	thioredoxin pathway	thioredoxin pathway	thioredoxin pathway	THIOREDOX-PWY	thioredoxin pathway
Biosynthesis	Cofactor, Prosthetic Group, Electron Carrier, and Vitamin Biosynthesis	Tetrahydrobiopterin Biosynthesis	erythro-tetrahydrobiopterin biosynthesis II	erythro-tetrahydrobiopterin biosynthesis II	erythro-tetrahydrobiopterin biosynthesis II	erythro-tetrahydrobiopterin biosynthesis II	erythro-tetrahydrobiopterin biosynthesis II	PWY-5664	erythro-tetrahydrobiopterin biosynthesis II
Biosynthesis	Cofactor, Prosthetic Group, Electron Carrier, and Vitamin Biosynthesis	Tetrahydrobiopterin Biosynthesis	threo-tetrahydrobiopterin biosynthesis	threo-tetrahydrobiopterin biosynthesis	threo-tetrahydrobiopterin biosynthesis	threo-tetrahydrobiopterin biosynthesis	threo-tetrahydrobiopterin biosynthesis	PWY-6983	threo-tetrahydrobiopterin biosynthesis
Biosynthesis	Cofactor, Prosthetic Group, Electron Carrier, and Vitamin Biosynthesis	Tetrahydrobiopterin Biosynthesis	erythro-tetrahydrobiopterin biosynthesis I	erythro-tetrahydrobiopterin biosynthesis I	erythro-tetrahydrobiopterin biosynthesis I	erythro-tetrahydrobiopterin biosynthesis I	erythro-tetrahydrobiopterin biosynthesis I	PWY-5663	erythro-tetrahydrobiopterin biosynthesis I
Biosynthesis	Cofactor, Prosthetic Group, Electron Carrier, and Vitamin Biosynthesis	Tetrapyrrole Biosynthesis	tetrapyrrole biosynthesis I (from glutamate)	tetrapyrrole biosynthesis I (from glutamate)	tetrapyrrole biosynthesis I (from glutamate)	tetrapyrrole biosynthesis I (from glutamate)	tetrapyrrole biosynthesis I (from glutamate)	PWY-5188	tetrapyrrole biosynthesis I (from glutamate)
Biosynthesis	Cofactor, Prosthetic Group, Electron Carrier, and Vitamin Biosynthesis	Tetrapyrrole Biosynthesis	tetrapyrrole biosynthesis II (from glycine)	tetrapyrrole biosynthesis II (from glycine)	tetrapyrrole biosynthesis II (from glycine)	tetrapyrrole biosynthesis II (from glycine)	tetrapyrrole biosynthesis II (from glycine)	PWY-5189	tetrapyrrole biosynthesis II (from glycine)
Biosynthesis	Cofactor, Prosthetic Group, Electron Carrier, and Vitamin Biosynthesis	Vitamin Biosynthesis	Ascorbate Biosynthesis	L-ascorbate biosynthesis I (L-galactose pathway)	L-ascorbate biosynthesis I (L-galactose pathway)	L-ascorbate biosynthesis I (L-galactose pathway)	L-ascorbate biosynthesis I (L-galactose pathway)	PWY-882	L-ascorbate biosynthesis I (L-galactose pathway)
Biosynthesis	Cofactor, Prosthetic Group, Electron Carrier, and Vitamin Biosynthesis	Vitamin Biosynthesis	Ascorbate Biosynthesis	L-ascorbate biosynthesis II (L-gulose pathway)	L-ascorbate biosynthesis II (L-gulose pathway)	L-ascorbate biosynthesis II (L-gulose pathway)	L-ascorbate biosynthesis II (L-gulose pathway)	PWY4FS-11	L-ascorbate biosynthesis II (L-gulose pathway)
Biosynthesis	Cofactor, Prosthetic Group, Electron Carrier, and Vitamin Biosynthesis	Vitamin Biosynthesis	Ascorbate Biosynthesis	L-ascorbate biosynthesis III	L-ascorbate biosynthesis III	L-ascorbate biosynthesis III	L-ascorbate biosynthesis III	PWY-5521	L-ascorbate biosynthesis III
Biosynthesis	Cofactor, Prosthetic Group, Electron Carrier, and Vitamin Biosynthesis	Vitamin Biosynthesis	Ascorbate Biosynthesis	L-ascorbate biosynthesis IV	L-ascorbate biosynthesis IV	L-ascorbate biosynthesis IV	L-ascorbate biosynthesis IV	PWY3DJ-35471	L-ascorbate biosynthesis IV
Biosynthesis	Cofactor, Prosthetic Group, Electron Carrier, and Vitamin Biosynthesis	Vitamin Biosynthesis	Ascorbate Biosynthesis	L-ascorbate biosynthesis V	L-ascorbate biosynthesis V	L-ascorbate biosynthesis V	L-ascorbate biosynthesis V	PWY-6415	L-ascorbate biosynthesis V
Biosynthesis	Cofactor, Prosthetic Group, Electron Carrier, and Vitamin Biosynthesis	Vitamin Biosynthesis	Ascorbate Biosynthesis	L-ascorbate biosynthesis VI (engineered pathway)	L-ascorbate biosynthesis VI (engineered pathway)	L-ascorbate biosynthesis VI (engineered pathway)	L-ascorbate biosynthesis VI (engineered pathway)	PWY-7165	L-ascorbate biosynthesis VI (engineered pathway)
Biosynthesis	Cofactor, Prosthetic Group, Electron Carrier, and Vitamin Biosynthesis	Vitamin Biosynthesis	Biotin Biosynthesis	biotin biosynthesis from 8-amino-7-oxononanoate I	biotin biosynthesis from 8-amino-7-oxononanoate I	biotin biosynthesis from 8-amino-7-oxononanoate I	biotin biosynthesis from 8-amino-7-oxononanoate I	PWY0-1507	biotin biosynthesis from 8-amino-7-oxononanoate I
Biosynthesis	Cofactor, Prosthetic Group, Electron Carrier, and Vitamin Biosynthesis	Vitamin Biosynthesis	Biotin Biosynthesis	biotin biosynthesis from 8-amino-7-oxononanoate II	biotin biosynthesis from 8-amino-7-oxononanoate II	biotin biosynthesis from 8-amino-7-oxononanoate II	biotin biosynthesis from 8-amino-7-oxononanoate II	PWY-7380	biotin biosynthesis from 8-amino-7-oxononanoate II
Biosynthesis	Cofactor, Prosthetic Group, Electron Carrier, and Vitamin Biosynthesis	Vitamin Biosynthesis	Biotin Biosynthesis	biotin biosynthesis I	biotin biosynthesis I	biotin biosynthesis I	biotin biosynthesis I	BIOTIN-BIOSYNTHESIS-PWY	biotin biosynthesis I
Biosynthesis	Cofactor, Prosthetic Group, Electron Carrier, and Vitamin Biosynthesis	Vitamin Biosynthesis	Biotin Biosynthesis	biotin biosynthesis II	biotin biosynthesis II	biotin biosynthesis II	biotin biosynthesis II	PWY-5005	biotin biosynthesis II
Biosynthesis	Cofactor, Prosthetic Group, Electron Carrier, and Vitamin Biosynthesis	Vitamin Biosynthesis	Cobamide Biosynthesis	Cobamide de novo Biosynthesis	Adenosylcobamide Biosynthesis	Adenosylcobalamin de novo Biosynthesis	adenosylcobalamin biosynthesis I (anaerobic)	PWY-5507	adenosylcobalamin biosynthesis I (anaerobic)
Biosynthesis	Cofactor, Prosthetic Group, Electron Carrier, and Vitamin Biosynthesis	Vitamin Biosynthesis	Cobamide Biosynthesis	Cobamide de novo Biosynthesis	Adenosylcobamide Biosynthesis	Adenosylcobalamin de novo Biosynthesis	adenosylcobalamin biosynthesis II (aerobic)	P381-PWY	adenosylcobalamin biosynthesis II (aerobic)
Biosynthesis	Cofactor, Prosthetic Group, Electron Carrier, and Vitamin Biosynthesis	Vitamin Biosynthesis	Cobamide Biosynthesis	Cobamide de novo Biosynthesis	Adenosylcobamide Biosynthesis	2-methyladeninyl adenosylcobamide biosynthesis from adenosylcobinamide-GDP	2-methyladeninyl adenosylcobamide biosynthesis from adenosylcobinamide-GDP	PWY-7965	2-methyladeninyl adenosylcobamide biosynthesis from adenosylcobinamide-GDP
Biosynthesis	Cofactor, Prosthetic Group, Electron Carrier, and Vitamin Biosynthesis	Vitamin Biosynthesis	Cobamide Biosynthesis	Cobamide de novo Biosynthesis	Adenosylcobamide Biosynthesis	4-methylphenyl adenosylcobamide biosynthesis from adenosylcobinamide-GDP	4-methylphenyl adenosylcobamide biosynthesis from adenosylcobinamide-GDP	PWY-7963	4-methylphenyl adenosylcobamide biosynthesis from adenosylcobinamide-GDP
Biosynthesis	Cofactor, Prosthetic Group, Electron Carrier, and Vitamin Biosynthesis	Vitamin Biosynthesis	Cobamide Biosynthesis	Cobamide de novo Biosynthesis	Adenosylcobamide Biosynthesis	5-hydroxybenzimidazolyl adenosylcobamide biosynthesis from adenosylcobinamide-GDP	5-hydroxybenzimidazolyl adenosylcobamide biosynthesis from adenosylcobinamide-GDP	PWY-7969	5-hydroxybenzimidazolyl adenosylcobamide biosynthesis from adenosylcobinamide-GDP
Biosynthesis	Cofactor, Prosthetic Group, Electron Carrier, and Vitamin Biosynthesis	Vitamin Biosynthesis	Cobamide Biosynthesis	Cobamide de novo Biosynthesis	Adenosylcobamide Biosynthesis	5-methoxy-6-methylbenzimidazolyl adenosylcobamide biosynthesis from adenosylcobinamide-GDP	5-methoxy-6-methylbenzimidazolyl adenosylcobamide biosynthesis from adenosylcobinamide-GDP	PWY-7966	5-methoxy-6-methylbenzimidazolyl adenosylcobamide biosynthesis from adenosylcobinamide-GDP
Biosynthesis	Cofactor, Prosthetic Group, Electron Carrier, and Vitamin Biosynthesis	Vitamin Biosynthesis	Cobamide Biosynthesis	Cobamide de novo Biosynthesis	Adenosylcobamide Biosynthesis	5-methoxybenzimidazolyl adenosylcobamide biosynthesis from adenosylcobinamide-GDP	5-methoxybenzimidazolyl adenosylcobamide biosynthesis from adenosylcobinamide-GDP	PWY-7967	5-methoxybenzimidazolyl adenosylcobamide biosynthesis from adenosylcobinamide-GDP
Biosynthesis	Cofactor, Prosthetic Group, Electron Carrier, and Vitamin Biosynthesis	Vitamin Biosynthesis	Cobamide Biosynthesis	Cobamide de novo Biosynthesis	Adenosylcobamide Biosynthesis	5-methylbenzimidazolyl adenosylcobamide biosynthesis from adenosylcobinamide-GDP	5-methylbenzimidazolyl adenosylcobamide biosynthesis from adenosylcobinamide-GDP	PWY-7968	5-methylbenzimidazolyl adenosylcobamide biosynthesis from adenosylcobinamide-GDP
Biosynthesis	Cofactor, Prosthetic Group, Electron Carrier, and Vitamin Biosynthesis	Vitamin Biosynthesis	Cobamide Biosynthesis	Cobamide de novo Biosynthesis	Adenosylcobamide Biosynthesis	adeninyl adenosylcobamide biosynthesis from adenosylcobinamide-GDP	adeninyl adenosylcobamide biosynthesis from adenosylcobinamide-GDP	PWY-7964	adeninyl adenosylcobamide biosynthesis from adenosylcobinamide-GDP
Biosynthesis	Cofactor, Prosthetic Group, Electron Carrier, and Vitamin Biosynthesis	Vitamin Biosynthesis	Cobamide Biosynthesis	Cobamide de novo Biosynthesis	Adenosylcobamide Biosynthesis	adenosylcobalamin biosynthesis from adenosylcobinamide-GDP I	adenosylcobalamin biosynthesis from adenosylcobinamide-GDP I	PWY-5509	adenosylcobalamin biosynthesis from adenosylcobinamide-GDP I
Biosynthesis	Cofactor, Prosthetic Group, Electron Carrier, and Vitamin Biosynthesis	Vitamin Biosynthesis	Cobamide Biosynthesis	Cobamide de novo Biosynthesis	Adenosylcobamide Biosynthesis	adenosylcobalamin biosynthesis from adenosylcobinamide-GDP II	adenosylcobalamin biosynthesis from adenosylcobinamide-GDP II	PWY-7975	adenosylcobalamin biosynthesis from adenosylcobinamide-GDP II
Biosynthesis	Cofactor, Prosthetic Group, Electron Carrier, and Vitamin Biosynthesis	Vitamin Biosynthesis	Cobamide Biosynthesis	Cobamide de novo Biosynthesis	Adenosylcobamide Biosynthesis	benzimidazolyl adenosylcobamide biosynthesis from adenosylcobinamide-GDP	benzimidazolyl adenosylcobamide biosynthesis from adenosylcobinamide-GDP	PWY-7970	benzimidazolyl adenosylcobamide biosynthesis from adenosylcobinamide-GDP
Biosynthesis	Cofactor, Prosthetic Group, Electron Carrier, and Vitamin Biosynthesis	Vitamin Biosynthesis	Cobamide Biosynthesis	Cobamide de novo Biosynthesis	Adenosylcobamide Biosynthesis	phenyl adenosylcobamide biosynthesis from adenosylcobinamide-GDP	phenyl adenosylcobamide biosynthesis from adenosylcobinamide-GDP	PWY-7961	phenyl adenosylcobamide biosynthesis from adenosylcobinamide-GDP
Biosynthesis	Cofactor, Prosthetic Group, Electron Carrier, and Vitamin Biosynthesis	Vitamin Biosynthesis	Cobamide Biosynthesis	Cobamide de novo Biosynthesis	Aminopropanol Phosphate Biosynthesis	aminopropanol phosphate biosynthesis I	aminopropanol phosphate biosynthesis I	PWY-5443	aminopropanol phosphate biosynthesis I
Biosynthesis	Cofactor, Prosthetic Group, Electron Carrier, and Vitamin Biosynthesis	Vitamin Biosynthesis	Cobamide Biosynthesis	Cobamide de novo Biosynthesis	Aminopropanol Phosphate Biosynthesis	aminopropanol phosphate biosynthesis II	aminopropanol phosphate biosynthesis II	PWY-7378	aminopropanol phosphate biosynthesis II
Biosynthesis	Cofactor, Prosthetic Group, Electron Carrier, and Vitamin Biosynthesis	Vitamin Biosynthesis	Cobamide Biosynthesis	Cobamide de novo Biosynthesis	Cobamide-Lower-Ligand Biosynthesis	5,6-Dimethylbenzimidazole Biosynthesis	5,6-dimethylbenzimidazole biosynthesis I (aerobic)	PWY-5523	5,6-dimethylbenzimidazole biosynthesis I (aerobic)
Biosynthesis	Cofactor, Prosthetic Group, Electron Carrier, and Vitamin Biosynthesis	Vitamin Biosynthesis	Cobamide Biosynthesis	Cobamide de novo Biosynthesis	Cobamide-Lower-Ligand Biosynthesis	5,6-Dimethylbenzimidazole Biosynthesis	5,6-dimethylbenzimidazole biosynthesis II (anaerobic)	PWY-7729	5,6-dimethylbenzimidazole biosynthesis II (anaerobic)
Biosynthesis	Cofactor, Prosthetic Group, Electron Carrier, and Vitamin Biosynthesis	Vitamin Biosynthesis	Cobamide Biosynthesis	Cobamide de novo Biosynthesis	Cobamide-Lower-Ligand Biosynthesis	5-hydroxybenzimidazole biosynthesis (anaerobic)	5-hydroxybenzimidazole biosynthesis (anaerobic)	PWY-8097	5-hydroxybenzimidazole biosynthesis (anaerobic)
Biosynthesis	Cofactor, Prosthetic Group, Electron Carrier, and Vitamin Biosynthesis	Vitamin Biosynthesis	Cobamide Biosynthesis	Cobamide de novo Biosynthesis	Cobamide-Lower-Ligand Biosynthesis	5-methoxy-6-methylbenzimidazole biosynthesis (anaerobic)	5-methoxy-6-methylbenzimidazole biosynthesis (anaerobic)	PWY-8095	5-methoxy-6-methylbenzimidazole biosynthesis (anaerobic)
Biosynthesis	Cofactor, Prosthetic Group, Electron Carrier, and Vitamin Biosynthesis	Vitamin Biosynthesis	Cobamide Biosynthesis	Cobamide de novo Biosynthesis	Cobamide-Lower-Ligand Biosynthesis	5-methoxybenzimidazole biosynthesis (anaerobic)	5-methoxybenzimidazole biosynthesis (anaerobic)	PWY-8096	5-methoxybenzimidazole biosynthesis (anaerobic)
Biosynthesis	Cofactor, Prosthetic Group, Electron Carrier, and Vitamin Biosynthesis	Vitamin Biosynthesis	Cobamide Biosynthesis	Cobamide de novo Biosynthesis	adenosylcobinamide-GDP biosynthesis from cobyrinate a,c-diamide	adenosylcobinamide-GDP biosynthesis from cobyrinate a,c-diamide	adenosylcobinamide-GDP biosynthesis from cobyrinate a,c-diamide	PWY-7962	adenosylcobinamide-GDP biosynthesis from cobyrinate a,c-diamide
Biosynthesis	Cofactor, Prosthetic Group, Electron Carrier, and Vitamin Biosynthesis	Vitamin Biosynthesis	Cobamide Biosynthesis	Cobinamide Salvage	Adenosylcobalamin Salvage from Cobinamide	adenosylcobinamide-GDP salvage from cobinamide I	adenosylcobinamide-GDP salvage from cobinamide I	PWY-7971	adenosylcobinamide-GDP salvage from cobinamide I
Biosynthesis	Cofactor, Prosthetic Group, Electron Carrier, and Vitamin Biosynthesis	Vitamin Biosynthesis	Cobamide Biosynthesis	Cobinamide Salvage	Adenosylcobalamin Salvage from Cobinamide	adenosylcobinamideGDP salvage from cobinamide II	adenosylcobinamideGDP salvage from cobinamide II	PWY-7972	adenosylcobinamideGDP salvage from cobinamide II
Biosynthesis	Cofactor, Prosthetic Group, Electron Carrier, and Vitamin Biosynthesis	Vitamin Biosynthesis	Cobamide Biosynthesis	Cobinamide Salvage	Adenosylcobalamin Salvage from Cobinamide	superpathway of adenosylcobalamin salvage from cobinamide I	superpathway of adenosylcobalamin salvage from cobinamide I	COBALSYN-PWY	superpathway of adenosylcobalamin salvage from cobinamide I
Biosynthesis	Cofactor, Prosthetic Group, Electron Carrier, and Vitamin Biosynthesis	Vitamin Biosynthesis	Cobamide Biosynthesis	Cobinamide Salvage	Adenosylcobalamin Salvage from Cobinamide	superpathway of adenosylcobalamin salvage from cobinamide II	superpathway of adenosylcobalamin salvage from cobinamide II	PWY-6269	superpathway of adenosylcobalamin salvage from cobinamide II
Biosynthesis	Cofactor, Prosthetic Group, Electron Carrier, and Vitamin Biosynthesis	Vitamin Biosynthesis	Cobamide Biosynthesis	Cobinamide Salvage	adenosylcobalamin salvage from cobalamin	adenosylcobalamin salvage from cobalamin	adenosylcobalamin salvage from cobalamin	PWY-6268	adenosylcobalamin salvage from cobalamin
Biosynthesis	Cofactor, Prosthetic Group, Electron Carrier, and Vitamin Biosynthesis	Vitamin Biosynthesis	Cobamide Biosynthesis	Cobinamide Salvage	cobalamin salvage (eukaryotic)	cobalamin salvage (eukaryotic)	cobalamin salvage (eukaryotic)	PWY-7974	cobalamin salvage (eukaryotic)
Biosynthesis	Cofactor, Prosthetic Group, Electron Carrier, and Vitamin Biosynthesis	Vitamin Biosynthesis	Flavin Biosynthesis	flavin biosynthesis I (bacteria and plants)	flavin biosynthesis I (bacteria and plants)	flavin biosynthesis I (bacteria and plants)	flavin biosynthesis I (bacteria and plants)	RIBOSYN2-PWY	flavin biosynthesis I (bacteria and plants)
Biosynthesis	Cofactor, Prosthetic Group, Electron Carrier, and Vitamin Biosynthesis	Vitamin Biosynthesis	Flavin Biosynthesis	flavin biosynthesis II (archaea)	flavin biosynthesis II (archaea)	flavin biosynthesis II (archaea)	flavin biosynthesis II (archaea)	PWY-6167	flavin biosynthesis II (archaea)
Biosynthesis	Cofactor, Prosthetic Group, Electron Carrier, and Vitamin Biosynthesis	Vitamin Biosynthesis	Flavin Biosynthesis	flavin biosynthesis III (fungi)	flavin biosynthesis III (fungi)	flavin biosynthesis III (fungi)	flavin biosynthesis III (fungi)	PWY-6168	flavin biosynthesis III (fungi)
Biosynthesis	Cofactor, Prosthetic Group, Electron Carrier, and Vitamin Biosynthesis	Vitamin Biosynthesis	Flavin Biosynthesis	flavin biosynthesis IV (mammalian)	flavin biosynthesis IV (mammalian)	flavin biosynthesis IV (mammalian)	flavin biosynthesis IV (mammalian)	PWY66-366	flavin biosynthesis IV (mammalian)
Biosynthesis	Cofactor, Prosthetic Group, Electron Carrier, and Vitamin Biosynthesis	Vitamin Biosynthesis	Flavin Biosynthesis	prenylated FMNH2 biosynthesis	prenylated FMNH2 biosynthesis	prenylated FMNH2 biosynthesis	prenylated FMNH2 biosynthesis	PWY0-1597	prenylated FMNH2 biosynthesis
Biosynthesis	Cofactor, Prosthetic Group, Electron Carrier, and Vitamin Biosynthesis	Vitamin Biosynthesis	Folate Biosynthesis	6-Hydroxymethyl-Dihydropterin Diphosphate Biosynthesis	6-hydroxymethyl-dihydropterin diphosphate biosynthesis I	6-hydroxymethyl-dihydropterin diphosphate biosynthesis I	6-hydroxymethyl-dihydropterin diphosphate biosynthesis I	PWY-6147	6-hydroxymethyl-dihydropterin diphosphate biosynthesis I
Biosynthesis	Cofactor, Prosthetic Group, Electron Carrier, and Vitamin Biosynthesis	Vitamin Biosynthesis	Folate Biosynthesis	6-Hydroxymethyl-Dihydropterin Diphosphate Biosynthesis	6-hydroxymethyl-dihydropterin diphosphate biosynthesis II (Methanocaldococcus)	6-hydroxymethyl-dihydropterin diphosphate biosynthesis II (Methanocaldococcus)	6-hydroxymethyl-dihydropterin diphosphate biosynthesis II (Methanocaldococcus)	PWY-6797	6-hydroxymethyl-dihydropterin diphosphate biosynthesis II (Methanocaldococcus)
Biosynthesis	Cofactor, Prosthetic Group, Electron Carrier, and Vitamin Biosynthesis	Vitamin Biosynthesis	Folate Biosynthesis	6-Hydroxymethyl-Dihydropterin Diphosphate Biosynthesis	6-hydroxymethyl-dihydropterin diphosphate biosynthesis III (Chlamydia)	6-hydroxymethyl-dihydropterin diphosphate biosynthesis III (Chlamydia)	6-hydroxymethyl-dihydropterin diphosphate biosynthesis III (Chlamydia)	PWY-7539	6-hydroxymethyl-dihydropterin diphosphate biosynthesis III (Chlamydia)
Biosynthesis	Cofactor, Prosthetic Group, Electron Carrier, and Vitamin Biosynthesis	Vitamin Biosynthesis	Folate Biosynthesis	6-Hydroxymethyl-Dihydropterin Diphosphate Biosynthesis	6-hydroxymethyl-dihydropterin diphosphate biosynthesis IV (Plasmodium)	6-hydroxymethyl-dihydropterin diphosphate biosynthesis IV (Plasmodium)	6-hydroxymethyl-dihydropterin diphosphate biosynthesis IV (Plasmodium)	PWY-7852	6-hydroxymethyl-dihydropterin diphosphate biosynthesis IV (Plasmodium)
Biosynthesis	Cofactor, Prosthetic Group, Electron Carrier, and Vitamin Biosynthesis	Vitamin Biosynthesis	Folate Biosynthesis	6-Hydroxymethyl-Dihydropterin Diphosphate Biosynthesis	6-hydroxymethyl-dihydropterin diphosphate biosynthesis V (Pyrococcus)	6-hydroxymethyl-dihydropterin diphosphate biosynthesis V (Pyrococcus)	6-hydroxymethyl-dihydropterin diphosphate biosynthesis V (Pyrococcus)	PWY-7853	6-hydroxymethyl-dihydropterin diphosphate biosynthesis V (Pyrococcus)
Biosynthesis	Cofactor, Prosthetic Group, Electron Carrier, and Vitamin Biosynthesis	Vitamin Biosynthesis	Folate Biosynthesis	Folate Transformations	folate transformations I	folate transformations I	folate transformations I	PWY-2201	folate transformations I
Biosynthesis	Cofactor, Prosthetic Group, Electron Carrier, and Vitamin Biosynthesis	Vitamin Biosynthesis	Folate Biosynthesis	Folate Transformations	folate transformations II (plants)	folate transformations II (plants)	folate transformations II (plants)	PWY-3841	folate transformations II (plants)
Biosynthesis	Cofactor, Prosthetic Group, Electron Carrier, and Vitamin Biosynthesis	Vitamin Biosynthesis	Folate Biosynthesis	Folate Transformations	folate transformations III (E. coli)	folate transformations III (E. coli)	folate transformations III (E. coli)	1CMET2-PWY	folate transformations III (E. coli)
Biosynthesis	Cofactor, Prosthetic Group, Electron Carrier, and Vitamin Biosynthesis	Vitamin Biosynthesis	Folate Biosynthesis	4-aminobenzoate biosynthesis	4-aminobenzoate biosynthesis	4-aminobenzoate biosynthesis	4-aminobenzoate biosynthesis	PWY-6543	4-aminobenzoate biosynthesis
Biosynthesis	Cofactor, Prosthetic Group, Electron Carrier, and Vitamin Biosynthesis	Vitamin Biosynthesis	Folate Biosynthesis	folate polyglutamylation	folate polyglutamylation	folate polyglutamylation	folate polyglutamylation	PWY-2161	folate polyglutamylation
Biosynthesis	Cofactor, Prosthetic Group, Electron Carrier, and Vitamin Biosynthesis	Vitamin Biosynthesis	Folate Biosynthesis	glutamate removal from folates	glutamate removal from folates	glutamate removal from folates	glutamate removal from folates	PWY-2161B	glutamate removal from folates
Biosynthesis	Cofactor, Prosthetic Group, Electron Carrier, and Vitamin Biosynthesis	Vitamin Biosynthesis	Folate Biosynthesis	superpathway of tetrahydrofolate biosynthesis	superpathway of tetrahydrofolate biosynthesis	superpathway of tetrahydrofolate biosynthesis	superpathway of tetrahydrofolate biosynthesis	PWY-6612	superpathway of tetrahydrofolate biosynthesis
Biosynthesis	Cofactor, Prosthetic Group, Electron Carrier, and Vitamin Biosynthesis	Vitamin Biosynthesis	Folate Biosynthesis	superpathway of tetrahydrofolate biosynthesis and salvage	superpathway of tetrahydrofolate biosynthesis and salvage	superpathway of tetrahydrofolate biosynthesis and salvage	superpathway of tetrahydrofolate biosynthesis and salvage	FOLSYN-PWY	superpathway of tetrahydrofolate biosynthesis and salvage
Biosynthesis	Cofactor, Prosthetic Group, Electron Carrier, and Vitamin Biosynthesis	Vitamin Biosynthesis	Folate Biosynthesis	tetrahydrofolate biosynthesis	tetrahydrofolate biosynthesis	tetrahydrofolate biosynthesis	tetrahydrofolate biosynthesis	PWY-6614	tetrahydrofolate biosynthesis
Biosynthesis	Cofactor, Prosthetic Group, Electron Carrier, and Vitamin Biosynthesis	Vitamin Biosynthesis	Folate Biosynthesis	tetrahydrofolate salvage from 5,10-methenyltetrahydrofolate	tetrahydrofolate salvage from 5,10-methenyltetrahydrofolate	tetrahydrofolate salvage from 5,10-methenyltetrahydrofolate	tetrahydrofolate salvage from 5,10-methenyltetrahydrofolate	PWY-6613	tetrahydrofolate salvage from 5,10-methenyltetrahydrofolate
Biosynthesis	Cofactor, Prosthetic Group, Electron Carrier, and Vitamin Biosynthesis	Vitamin Biosynthesis	Phosphopantothenate Biosynthesis	phosphopantothenate biosynthesis I	phosphopantothenate biosynthesis I	phosphopantothenate biosynthesis I	phosphopantothenate biosynthesis I	PANTO-PWY	phosphopantothenate biosynthesis I
Biosynthesis	Cofactor, Prosthetic Group, Electron Carrier, and Vitamin Biosynthesis	Vitamin Biosynthesis	Phosphopantothenate Biosynthesis	phosphopantothenate biosynthesis II	phosphopantothenate biosynthesis II	phosphopantothenate biosynthesis II	phosphopantothenate biosynthesis II	PWY-3961	phosphopantothenate biosynthesis II
Biosynthesis	Cofactor, Prosthetic Group, Electron Carrier, and Vitamin Biosynthesis	Vitamin Biosynthesis	Phosphopantothenate Biosynthesis	phosphopantothenate biosynthesis III (archaebacteria)	phosphopantothenate biosynthesis III (archaebacteria)	phosphopantothenate biosynthesis III (archaebacteria)	phosphopantothenate biosynthesis III (archaebacteria)	PWY-6654	phosphopantothenate biosynthesis III (archaebacteria)
Biosynthesis	Cofactor, Prosthetic Group, Electron Carrier, and Vitamin Biosynthesis	Vitamin Biosynthesis	Thiamine Biosynthesis	4-amino-2-methyl-5-diphosphomethylpyrimidine biosynthesis	4-amino-2-methyl-5-diphosphomethylpyrimidine biosynthesis	4-amino-2-methyl-5-diphosphomethylpyrimidine biosynthesis	4-amino-2-methyl-5-diphosphomethylpyrimidine biosynthesis	PWY-6890	4-amino-2-methyl-5-diphosphomethylpyrimidine biosynthesis
Biosynthesis	Cofactor, Prosthetic Group, Electron Carrier, and Vitamin Biosynthesis	Vitamin Biosynthesis	Thiamine Biosynthesis	4-amino-2-methyl-5-diphosphomethylpyrimidine biosynthesis	4-amino-2-methyl-5-phosphomethylpyrimidine biosynthesis	4-amino-2-methyl-5-phosphomethylpyrimidine biosynthesis	4-amino-2-methyl-5-phosphomethylpyrimidine biosynthesis	PWY-7282	4-amino-2-methyl-5-phosphomethylpyrimidine biosynthesis
Biosynthesis	Cofactor, Prosthetic Group, Electron Carrier, and Vitamin Biosynthesis	Vitamin Biosynthesis	Thiamine Biosynthesis	Thiamine Diphosphate Biosynthesis	thiamine diphosphate biosynthesis I (E. coli)	thiamine diphosphate biosynthesis I (E. coli)	thiamine diphosphate biosynthesis I (E. coli)	PWY-6894	thiamine diphosphate biosynthesis I (E. coli)
Biosynthesis	Cofactor, Prosthetic Group, Electron Carrier, and Vitamin Biosynthesis	Vitamin Biosynthesis	Thiamine Biosynthesis	Thiamine Diphosphate Biosynthesis	thiamine diphosphate biosynthesis II (Bacillus)	thiamine diphosphate biosynthesis II (Bacillus)	thiamine diphosphate biosynthesis II (Bacillus)	PWY-6893	thiamine diphosphate biosynthesis II (Bacillus)
Biosynthesis	Cofactor, Prosthetic Group, Electron Carrier, and Vitamin Biosynthesis	Vitamin Biosynthesis	Thiamine Biosynthesis	Thiamine Diphosphate Biosynthesis	thiamine diphosphate biosynthesis III (Staphylococcus)	thiamine diphosphate biosynthesis III (Staphylococcus)	thiamine diphosphate biosynthesis III (Staphylococcus)	PWY-6907	thiamine diphosphate biosynthesis III (Staphylococcus)
Biosynthesis	Cofactor, Prosthetic Group, Electron Carrier, and Vitamin Biosynthesis	Vitamin Biosynthesis	Thiamine Biosynthesis	Thiamine Diphosphate Biosynthesis	thiamine diphosphate biosynthesis IV (eukaryotes)	thiamine diphosphate biosynthesis IV (eukaryotes)	thiamine diphosphate biosynthesis IV (eukaryotes)	PWY-6908	thiamine diphosphate biosynthesis IV (eukaryotes)
Biosynthesis	Cofactor, Prosthetic Group, Electron Carrier, and Vitamin Biosynthesis	Vitamin Biosynthesis	Thiamine Biosynthesis	Thiamine Salvage	base-degraded thiamine salvage	base-degraded thiamine salvage	base-degraded thiamine salvage	PWY-6899	base-degraded thiamine salvage
Biosynthesis	Cofactor, Prosthetic Group, Electron Carrier, and Vitamin Biosynthesis	Vitamin Biosynthesis	Thiamine Biosynthesis	Thiamine Salvage	hydroxymethylpyrimidine salvage	hydroxymethylpyrimidine salvage	hydroxymethylpyrimidine salvage	PWY-6910	hydroxymethylpyrimidine salvage
Biosynthesis	Cofactor, Prosthetic Group, Electron Carrier, and Vitamin Biosynthesis	Vitamin Biosynthesis	Thiamine Biosynthesis	Thiamine Salvage	thiamine salvage I	thiamine salvage I	thiamine salvage I	PWY-6896	thiamine salvage I
Biosynthesis	Cofactor, Prosthetic Group, Electron Carrier, and Vitamin Biosynthesis	Vitamin Biosynthesis	Thiamine Biosynthesis	Thiamine Salvage	thiamine salvage II	thiamine salvage II	thiamine salvage II	PWY-6897	thiamine salvage II
Biosynthesis	Cofactor, Prosthetic Group, Electron Carrier, and Vitamin Biosynthesis	Vitamin Biosynthesis	Thiamine Biosynthesis	Thiamine Salvage	thiamine salvage III	thiamine salvage III	thiamine salvage III	PWY-6898	thiamine salvage III
Biosynthesis	Cofactor, Prosthetic Group, Electron Carrier, and Vitamin Biosynthesis	Vitamin Biosynthesis	Thiamine Biosynthesis	Thiamine Salvage	thiamine salvage IV (yeast)	thiamine salvage IV (yeast)	thiamine salvage IV (yeast)	PWY-7356	thiamine salvage IV (yeast)
Biosynthesis	Cofactor, Prosthetic Group, Electron Carrier, and Vitamin Biosynthesis	Vitamin Biosynthesis	Thiamine Biosynthesis	Thiazole Biosynthesis	thiazole biosynthesis I (facultative anaerobic bacteria)	thiazole biosynthesis I (facultative anaerobic bacteria)	thiazole biosynthesis I (facultative anaerobic bacteria)	PWY-6892	thiazole biosynthesis I (facultative anaerobic bacteria)
Biosynthesis	Cofactor, Prosthetic Group, Electron Carrier, and Vitamin Biosynthesis	Vitamin Biosynthesis	Thiamine Biosynthesis	Thiazole Biosynthesis	thiazole biosynthesis II (aerobic bacteria)	thiazole biosynthesis II (aerobic bacteria)	thiazole biosynthesis II (aerobic bacteria)	PWY-6891	thiazole biosynthesis II (aerobic bacteria)
Biosynthesis	Cofactor, Prosthetic Group, Electron Carrier, and Vitamin Biosynthesis	Vitamin Biosynthesis	Thiamine Biosynthesis	Thiazole Biosynthesis	thiazole biosynthesis III	thiazole biosynthesis III	thiazole biosynthesis III	PWY-6909	thiazole biosynthesis III
Biosynthesis	Cofactor, Prosthetic Group, Electron Carrier, and Vitamin Biosynthesis	Vitamin Biosynthesis	Thiamine Biosynthesis	superpathway of thiamine diphosphate biosynthesis I	superpathway of thiamine diphosphate biosynthesis I	superpathway of thiamine diphosphate biosynthesis I	superpathway of thiamine diphosphate biosynthesis I	THISYN-PWY	superpathway of thiamine diphosphate biosynthesis I
Biosynthesis	Cofactor, Prosthetic Group, Electron Carrier, and Vitamin Biosynthesis	Vitamin Biosynthesis	Thiamine Biosynthesis	superpathway of thiamine diphosphate biosynthesis II	superpathway of thiamine diphosphate biosynthesis II	superpathway of thiamine diphosphate biosynthesis II	superpathway of thiamine diphosphate biosynthesis II	PWY-6895	superpathway of thiamine diphosphate biosynthesis II
Biosynthesis	Cofactor, Prosthetic Group, Electron Carrier, and Vitamin Biosynthesis	Vitamin Biosynthesis	Thiamine Biosynthesis	superpathway of thiamine diphosphate biosynthesis III (eukaryotes)	superpathway of thiamine diphosphate biosynthesis III (eukaryotes)	superpathway of thiamine diphosphate biosynthesis III (eukaryotes)	superpathway of thiamine diphosphate biosynthesis III (eukaryotes)	THISYNARA-PWY	superpathway of thiamine diphosphate biosynthesis III (eukaryotes)
Biosynthesis	Cofactor, Prosthetic Group, Electron Carrier, and Vitamin Biosynthesis	Vitamin Biosynthesis	Thiamine Biosynthesis	thiamine formation from pyrithiamine and oxythiamine (yeast)	thiamine formation from pyrithiamine and oxythiamine (yeast)	thiamine formation from pyrithiamine and oxythiamine (yeast)	thiamine formation from pyrithiamine and oxythiamine (yeast)	PWY-7357	thiamine formation from pyrithiamine and oxythiamine (yeast)
Biosynthesis	Cofactor, Prosthetic Group, Electron Carrier, and Vitamin Biosynthesis	Vitamin Biosynthesis	Thiamine Biosynthesis	thiamine triphosphate metabolism	thiamine triphosphate metabolism	thiamine triphosphate metabolism	thiamine triphosphate metabolism	PWY-7369	thiamine triphosphate metabolism
Biosynthesis	Cofactor, Prosthetic Group, Electron Carrier, and Vitamin Biosynthesis	Vitamin Biosynthesis	Vitamin A Biosynthesis	Visual Cycles	11-cis-3-hydroxyretinal biosynthesis	11-cis-3-hydroxyretinal biosynthesis	11-cis-3-hydroxyretinal biosynthesis	PWY-7043	11-cis-3-hydroxyretinal biosynthesis
Biosynthesis	Cofactor, Prosthetic Group, Electron Carrier, and Vitamin Biosynthesis	Vitamin Biosynthesis	Vitamin A Biosynthesis	Visual Cycles	the visual cycle (insects)	the visual cycle (insects)	the visual cycle (insects)	PWY-7042	the visual cycle (insects)
Biosynthesis	Cofactor, Prosthetic Group, Electron Carrier, and Vitamin Biosynthesis	Vitamin Biosynthesis	Vitamin A Biosynthesis	Visual Cycles	the visual cycle I (vertebrates)	the visual cycle I (vertebrates)	the visual cycle I (vertebrates)	PWY-6861	the visual cycle I (vertebrates)
Biosynthesis	Cofactor, Prosthetic Group, Electron Carrier, and Vitamin Biosynthesis	Vitamin Biosynthesis	Vitamin A Biosynthesis	Visual Cycles	the visual cycle II (molluscs)	the visual cycle II (molluscs)	the visual cycle II (molluscs)	PWY-7041	the visual cycle II (molluscs)
Biosynthesis	Cofactor, Prosthetic Group, Electron Carrier, and Vitamin Biosynthesis	Vitamin Biosynthesis	Vitamin A Biosynthesis	retinoate biosynthesis I	retinoate biosynthesis I	retinoate biosynthesis I	retinoate biosynthesis I	PWY-6872	retinoate biosynthesis I
Biosynthesis	Cofactor, Prosthetic Group, Electron Carrier, and Vitamin Biosynthesis	Vitamin Biosynthesis	Vitamin A Biosynthesis	retinoate biosynthesis II	retinoate biosynthesis II	retinoate biosynthesis II	retinoate biosynthesis II	PWY-6875	retinoate biosynthesis II
Biosynthesis	Cofactor, Prosthetic Group, Electron Carrier, and Vitamin Biosynthesis	Vitamin Biosynthesis	Vitamin A Biosynthesis	retinol biosynthesis	retinol biosynthesis	retinol biosynthesis	retinol biosynthesis	PWY-6857	retinol biosynthesis
Biosynthesis	Cofactor, Prosthetic Group, Electron Carrier, and Vitamin Biosynthesis	Vitamin Biosynthesis	Vitamin B6 Biosynthesis	pyridoxal 5'-phosphate biosynthesis I	pyridoxal 5'-phosphate biosynthesis I	pyridoxal 5'-phosphate biosynthesis I	pyridoxal 5'-phosphate biosynthesis I	PYRIDOXSYN-PWY	pyridoxal 5'-phosphate biosynthesis I
Biosynthesis	Cofactor, Prosthetic Group, Electron Carrier, and Vitamin Biosynthesis	Vitamin Biosynthesis	Vitamin B6 Biosynthesis	pyridoxal 5'-phosphate biosynthesis II	pyridoxal 5'-phosphate biosynthesis II	pyridoxal 5'-phosphate biosynthesis II	pyridoxal 5'-phosphate biosynthesis II	PWY-6466	pyridoxal 5'-phosphate biosynthesis II
Biosynthesis	Cofactor, Prosthetic Group, Electron Carrier, and Vitamin Biosynthesis	Vitamin Biosynthesis	Vitamin B6 Biosynthesis	pyridoxal 5'-phosphate salvage I	pyridoxal 5'-phosphate salvage I	pyridoxal 5'-phosphate salvage I	pyridoxal 5'-phosphate salvage I	PLPSAL-PWY	pyridoxal 5'-phosphate salvage I
Biosynthesis	Cofactor, Prosthetic Group, Electron Carrier, and Vitamin Biosynthesis	Vitamin Biosynthesis	Vitamin B6 Biosynthesis	pyridoxal 5'-phosphate salvage II (plants)	pyridoxal 5'-phosphate salvage II (plants)	pyridoxal 5'-phosphate salvage II (plants)	pyridoxal 5'-phosphate salvage II (plants)	PWY-7204	pyridoxal 5'-phosphate salvage II (plants)
Biosynthesis	Cofactor, Prosthetic Group, Electron Carrier, and Vitamin Biosynthesis	Vitamin Biosynthesis	Vitamin B6 Biosynthesis	superpathway of pyridoxal 5'-phosphate biosynthesis and salvage	superpathway of pyridoxal 5'-phosphate biosynthesis and salvage	superpathway of pyridoxal 5'-phosphate biosynthesis and salvage	superpathway of pyridoxal 5'-phosphate biosynthesis and salvage	PWY0-845	superpathway of pyridoxal 5'-phosphate biosynthesis and salvage
Biosynthesis	Cofactor, Prosthetic Group, Electron Carrier, and Vitamin Biosynthesis	Vitamin Biosynthesis	dehydro-D-arabinono-1,4-lactone biosynthesis	dehydro-D-arabinono-1,4-lactone biosynthesis	dehydro-D-arabinono-1,4-lactone biosynthesis	dehydro-D-arabinono-1,4-lactone biosynthesis	dehydro-D-arabinono-1,4-lactone biosynthesis	PWY3O-6	dehydro-D-arabinono-1,4-lactone biosynthesis
Biosynthesis	Cofactor, Prosthetic Group, Electron Carrier, and Vitamin Biosynthesis	Vitamin Biosynthesis	phylloquinol biosynthesis	phylloquinol biosynthesis	phylloquinol biosynthesis	phylloquinol biosynthesis	phylloquinol biosynthesis	PWY-5027	phylloquinol biosynthesis
Biosynthesis	Cofactor, Prosthetic Group, Electron Carrier, and Vitamin Biosynthesis	Vitamin Biosynthesis	superpathway of coenzyme A biosynthesis I (bacteria)	superpathway of coenzyme A biosynthesis I (bacteria)	superpathway of coenzyme A biosynthesis I (bacteria)	superpathway of coenzyme A biosynthesis I (bacteria)	superpathway of coenzyme A biosynthesis I (bacteria)	PANTOSYN-PWY	superpathway of coenzyme A biosynthesis I (bacteria)
Biosynthesis	Cofactor, Prosthetic Group, Electron Carrier, and Vitamin Biosynthesis	Vitamin Biosynthesis	vitamin D3 biosynthesis	vitamin D3 biosynthesis	vitamin D3 biosynthesis	vitamin D3 biosynthesis	vitamin D3 biosynthesis	PWY-6076	vitamin D3 biosynthesis
Biosynthesis	Cofactor, Prosthetic Group, Electron Carrier, and Vitamin Biosynthesis	Vitamin Biosynthesis	vitamin E biosynthesis (tocopherols)	vitamin E biosynthesis (tocopherols)	vitamin E biosynthesis (tocopherols)	vitamin E biosynthesis (tocopherols)	vitamin E biosynthesis (tocopherols)	PWY-1422	vitamin E biosynthesis (tocopherols)
Biosynthesis	Cofactor, Prosthetic Group, Electron Carrier, and Vitamin Biosynthesis	Vitamin Biosynthesis	vitamin E biosynthesis (tocotrienols)	vitamin E biosynthesis (tocotrienols)	vitamin E biosynthesis (tocotrienols)	vitamin E biosynthesis (tocotrienols)	vitamin E biosynthesis (tocotrienols)	PWY-7436	vitamin E biosynthesis (tocotrienols)
Biosynthesis	Cofactor, Prosthetic Group, Electron Carrier, and Vitamin Biosynthesis	Vitamin Biosynthesis	vitamin K-epoxide cycle	vitamin K-epoxide cycle	vitamin K-epoxide cycle	vitamin K-epoxide cycle	vitamin K-epoxide cycle	PWY-7999	vitamin K-epoxide cycle
Biosynthesis	Cofactor, Prosthetic Group, Electron Carrier, and Vitamin Biosynthesis	3-amino-3-phenylpropanoyl-CoA biosynthesis	3-amino-3-phenylpropanoyl-CoA biosynthesis	3-amino-3-phenylpropanoyl-CoA biosynthesis	3-amino-3-phenylpropanoyl-CoA biosynthesis	3-amino-3-phenylpropanoyl-CoA biosynthesis	3-amino-3-phenylpropanoyl-CoA biosynthesis	PWY-7064	3-amino-3-phenylpropanoyl-CoA biosynthesis
Biosynthesis	Cofactor, Prosthetic Group, Electron Carrier, and Vitamin Biosynthesis	acyl carrier protein activation	acyl carrier protein activation	acyl carrier protein activation	acyl carrier protein activation	acyl carrier protein activation	acyl carrier protein activation	PWY-6012-1	acyl carrier protein activation
Biosynthesis	Cofactor, Prosthetic Group, Electron Carrier, and Vitamin Biosynthesis	acyl carrier protein metabolism	acyl carrier protein metabolism	acyl carrier protein metabolism	acyl carrier protein metabolism	acyl carrier protein metabolism	acyl carrier protein metabolism	PWY-6012	acyl carrier protein metabolism
Biosynthesis	Cofactor, Prosthetic Group, Electron Carrier, and Vitamin Biosynthesis	bis(guanylyl molybdenum cofactor) biosynthesis	bis(guanylyl molybdenum cofactor) biosynthesis	bis(guanylyl molybdenum cofactor) biosynthesis	bis(guanylyl molybdenum cofactor) biosynthesis	bis(guanylyl molybdenum cofactor) biosynthesis	bis(guanylyl molybdenum cofactor) biosynthesis	PWY-7639	bis(guanylyl molybdenum cofactor) biosynthesis
Biosynthesis	Cofactor, Prosthetic Group, Electron Carrier, and Vitamin Biosynthesis	citrate lyase activation	citrate lyase activation	citrate lyase activation	citrate lyase activation	citrate lyase activation	citrate lyase activation	P2-PWY	citrate lyase activation
Biosynthesis	Cofactor, Prosthetic Group, Electron Carrier, and Vitamin Biosynthesis	coenzyme B biosynthesis	coenzyme B biosynthesis	coenzyme B biosynthesis	coenzyme B biosynthesis	coenzyme B biosynthesis	coenzyme B biosynthesis	P241-PWY	coenzyme B biosynthesis
Biosynthesis	Cofactor, Prosthetic Group, Electron Carrier, and Vitamin Biosynthesis	cytidylyl molybdenum cofactor biosynthesis	cytidylyl molybdenum cofactor biosynthesis	cytidylyl molybdenum cofactor biosynthesis	cytidylyl molybdenum cofactor biosynthesis	cytidylyl molybdenum cofactor biosynthesis	cytidylyl molybdenum cofactor biosynthesis	PWY-6476	cytidylyl molybdenum cofactor biosynthesis
Biosynthesis	Cofactor, Prosthetic Group, Electron Carrier, and Vitamin Biosynthesis	factor 420 biosynthesis	factor 420 biosynthesis	factor 420 biosynthesis	factor 420 biosynthesis	factor 420 biosynthesis	factor 420 biosynthesis	PWY-5198	factor 420 biosynthesis
Biosynthesis	Cofactor, Prosthetic Group, Electron Carrier, and Vitamin Biosynthesis	factor 420 polyglutamylation	factor 420 polyglutamylation	factor 420 polyglutamylation	factor 420 polyglutamylation	factor 420 polyglutamylation	factor 420 polyglutamylation	PWY-5199	factor 420 polyglutamylation
Biosynthesis	Cofactor, Prosthetic Group, Electron Carrier, and Vitamin Biosynthesis	factor 430 biosynthesis	factor 430 biosynthesis	factor 430 biosynthesis	factor 430 biosynthesis	factor 430 biosynthesis	factor 430 biosynthesis	PWY-5196	factor 430 biosynthesis
Biosynthesis	Cofactor, Prosthetic Group, Electron Carrier, and Vitamin Biosynthesis	FeMo cofactor biosynthesis	FeMo cofactor biosynthesis	FeMo cofactor biosynthesis	FeMo cofactor biosynthesis	FeMo cofactor biosynthesis	FeMo cofactor biosynthesis	PWY-7710	FeMo cofactor biosynthesis
Biosynthesis	Cofactor, Prosthetic Group, Electron Carrier, and Vitamin Biosynthesis	flavin-N5-oxide biosynthesis	flavin-N5-oxide biosynthesis	flavin-N5-oxide biosynthesis	flavin-N5-oxide biosynthesis	flavin-N5-oxide biosynthesis	flavin-N5-oxide biosynthesis	PWY-8063	flavin-N5-oxide biosynthesis
Biosynthesis	Cofactor, Prosthetic Group, Electron Carrier, and Vitamin Biosynthesis	guanylyl molybdenum cofactor biosynthesis	guanylyl molybdenum cofactor biosynthesis	guanylyl molybdenum cofactor biosynthesis	guanylyl molybdenum cofactor biosynthesis	guanylyl molybdenum cofactor biosynthesis	guanylyl molybdenum cofactor biosynthesis	PWY-5964	guanylyl molybdenum cofactor biosynthesis
Biosynthesis	Cofactor, Prosthetic Group, Electron Carrier, and Vitamin Biosynthesis	malonate decarboxylase activation	malonate decarboxylase activation	malonate decarboxylase activation	malonate decarboxylase activation	malonate decarboxylase activation	malonate decarboxylase activation	PWY-5796	malonate decarboxylase activation
Biosynthesis	Cofactor, Prosthetic Group, Electron Carrier, and Vitamin Biosynthesis	methanofuran biosynthesis	methanofuran biosynthesis	methanofuran biosynthesis	methanofuran biosynthesis	methanofuran biosynthesis	methanofuran biosynthesis	PWY-5254	methanofuran biosynthesis
Biosynthesis	Cofactor, Prosthetic Group, Electron Carrier, and Vitamin Biosynthesis	nickel cofactor biosynthesis	nickel cofactor biosynthesis	nickel cofactor biosynthesis	nickel cofactor biosynthesis	nickel cofactor biosynthesis	nickel cofactor biosynthesis	PWY-7928	nickel cofactor biosynthesis
Biosynthesis	Cofactor, Prosthetic Group, Electron Carrier, and Vitamin Biosynthesis	phycocyanobilin biosynthesis	phycocyanobilin biosynthesis	phycocyanobilin biosynthesis	phycocyanobilin biosynthesis	phycocyanobilin biosynthesis	phycocyanobilin biosynthesis	PWY-5917	phycocyanobilin biosynthesis
Biosynthesis	Cofactor, Prosthetic Group, Electron Carrier, and Vitamin Biosynthesis	phycoerythrobilin biosynthesis I	phycoerythrobilin biosynthesis I	phycoerythrobilin biosynthesis I	phycoerythrobilin biosynthesis I	phycoerythrobilin biosynthesis I	phycoerythrobilin biosynthesis I	PWY-5915	phycoerythrobilin biosynthesis I
Biosynthesis	Cofactor, Prosthetic Group, Electron Carrier, and Vitamin Biosynthesis	phycoerythrobilin biosynthesis II	phycoerythrobilin biosynthesis II	phycoerythrobilin biosynthesis II	phycoerythrobilin biosynthesis II	phycoerythrobilin biosynthesis II	phycoerythrobilin biosynthesis II	PWY-7580	phycoerythrobilin biosynthesis II
Biosynthesis	Cofactor, Prosthetic Group, Electron Carrier, and Vitamin Biosynthesis	phycourobilin biosynthesis	phycourobilin biosynthesis	phycourobilin biosynthesis	phycourobilin biosynthesis	phycourobilin biosynthesis	phycourobilin biosynthesis	PWY-7579	phycourobilin biosynthesis
Biosynthesis	Cofactor, Prosthetic Group, Electron Carrier, and Vitamin Biosynthesis	phycoviolobilin biosynthesis	phycoviolobilin biosynthesis	phycoviolobilin biosynthesis	phycoviolobilin biosynthesis	phycoviolobilin biosynthesis	phycoviolobilin biosynthesis	PWY-7578	phycoviolobilin biosynthesis
Biosynthesis	Cofactor, Prosthetic Group, Electron Carrier, and Vitamin Biosynthesis	phytochromobilin biosynthesis	phytochromobilin biosynthesis	phytochromobilin biosynthesis	phytochromobilin biosynthesis	phytochromobilin biosynthesis	phytochromobilin biosynthesis	PWY-7170	phytochromobilin biosynthesis
Biosynthesis	Cofactor, Prosthetic Group, Electron Carrier, and Vitamin Biosynthesis	pyrroloquinoline quinone biosynthesis	pyrroloquinoline quinone biosynthesis	pyrroloquinoline quinone biosynthesis	pyrroloquinoline quinone biosynthesis	pyrroloquinoline quinone biosynthesis	pyrroloquinoline quinone biosynthesis	PWY-6420	pyrroloquinoline quinone biosynthesis
Biosynthesis	Cofactor, Prosthetic Group, Electron Carrier, and Vitamin Biosynthesis	pyruvoyl group formation from L-serine	pyruvoyl group formation from L-serine	pyruvoyl group formation from L-serine	pyruvoyl group formation from L-serine	pyruvoyl group formation from L-serine	pyruvoyl group formation from L-serine	PWY-8057	pyruvoyl group formation from L-serine
Biosynthesis	Cofactor, Prosthetic Group, Electron Carrier, and Vitamin Biosynthesis	S-adenosyl-L-methionine biosynthesis	S-adenosyl-L-methionine biosynthesis	S-adenosyl-L-methionine biosynthesis	S-adenosyl-L-methionine biosynthesis	S-adenosyl-L-methionine biosynthesis	S-adenosyl-L-methionine biosynthesis	SAM-PWY	S-adenosyl-L-methionine biosynthesis
Biosynthesis	Cofactor, Prosthetic Group, Electron Carrier, and Vitamin Biosynthesis	tetrahydromethanopterin biosynthesis	tetrahydromethanopterin biosynthesis	tetrahydromethanopterin biosynthesis	tetrahydromethanopterin biosynthesis	tetrahydromethanopterin biosynthesis	tetrahydromethanopterin biosynthesis	PWY-6148	tetrahydromethanopterin biosynthesis
Biosynthesis	Cofactor, Prosthetic Group, Electron Carrier, and Vitamin Biosynthesis	tetrahydromonapterin biosynthesis	tetrahydromonapterin biosynthesis	tetrahydromonapterin biosynthesis	tetrahydromonapterin biosynthesis	tetrahydromonapterin biosynthesis	tetrahydromonapterin biosynthesis	PWY0-1433	tetrahydromonapterin biosynthesis
Biosynthesis	Cofactor, Prosthetic Group, Electron Carrier, and Vitamin Biosynthesis	tetrahydropteridine recycling	tetrahydropteridine recycling	tetrahydropteridine recycling	tetrahydropteridine recycling	tetrahydropteridine recycling	tetrahydropteridine recycling	PWY-8099	tetrahydropteridine recycling
Biosynthesis	Cofactor, Prosthetic Group, Electron Carrier, and Vitamin Biosynthesis	thio-molybdenum cofactor biosynthesis	thio-molybdenum cofactor biosynthesis	thio-molybdenum cofactor biosynthesis	thio-molybdenum cofactor biosynthesis	thio-molybdenum cofactor biosynthesis	thio-molybdenum cofactor biosynthesis	PWY-5963	thio-molybdenum cofactor biosynthesis
Biosynthesis	Cofactor, Prosthetic Group, Electron Carrier, and Vitamin Biosynthesis	[2Fe-2S] iron-sulfur cluster biosynthesis	[2Fe-2S] iron-sulfur cluster biosynthesis	[2Fe-2S] iron-sulfur cluster biosynthesis	[2Fe-2S] iron-sulfur cluster biosynthesis	[2Fe-2S] iron-sulfur cluster biosynthesis	[2Fe-2S] iron-sulfur cluster biosynthesis	PWY-7250	[2Fe-2S] iron-sulfur cluster biosynthesis
Biosynthesis	Fatty Acid and Lipid Biosynthesis	Anandamide Biosynthesis	anandamide biosynthesis I	anandamide biosynthesis I	anandamide biosynthesis I	anandamide biosynthesis I	anandamide biosynthesis I	PWY-8051	anandamide biosynthesis I
Biosynthesis	Fatty Acid and Lipid Biosynthesis	Anandamide Biosynthesis	anandamide biosynthesis II	anandamide biosynthesis II	anandamide biosynthesis II	anandamide biosynthesis II	anandamide biosynthesis II	PWY-8053	anandamide biosynthesis II
Biosynthesis	Fatty Acid and Lipid Biosynthesis	Fatty Acid Biosynthesis	Cyclopropane Fatty Acid Biosynthesis	cyclopropane fatty acid (CFA) biosynthesis	cyclopropane fatty acid (CFA) biosynthesis	cyclopropane fatty acid (CFA) biosynthesis	cyclopropane fatty acid (CFA) biosynthesis	PWY0-541	cyclopropane fatty acid (CFA) biosynthesis
Biosynthesis	Fatty Acid and Lipid Biosynthesis	Fatty Acid Biosynthesis	Cyclopropane Fatty Acid Biosynthesis	sterculate biosynthesis	sterculate biosynthesis	sterculate biosynthesis	sterculate biosynthesis	PWY-4942	sterculate biosynthesis
Biosynthesis	Fatty Acid and Lipid Biosynthesis	Fatty Acid Biosynthesis	Epoxylated Fatty Acid Biosynthesis	Vernolate Biosynthesis	vernolate biosynthesis I	vernolate biosynthesis I	vernolate biosynthesis I	PWY-6014	vernolate biosynthesis I
Biosynthesis	Fatty Acid and Lipid Biosynthesis	Fatty Acid Biosynthesis	Epoxylated Fatty Acid Biosynthesis	Vernolate Biosynthesis	vernolate biosynthesis II	vernolate biosynthesis II	vernolate biosynthesis II	PWY-7634	vernolate biosynthesis II
Biosynthesis	Fatty Acid and Lipid Biosynthesis	Fatty Acid Biosynthesis	Epoxylated Fatty Acid Biosynthesis	Vernolate Biosynthesis	vernolate biosynthesis III	vernolate biosynthesis III	vernolate biosynthesis III	PWY-6917	vernolate biosynthesis III
Biosynthesis	Fatty Acid and Lipid Biosynthesis	Fatty Acid Biosynthesis	Fatty Acid Biosynthesis Initiation	fatty acid biosynthesis initiation (animals and fungi, cytoplasm)	fatty acid biosynthesis initiation (animals and fungi, cytoplasm)	fatty acid biosynthesis initiation (animals and fungi, cytoplasm)	fatty acid biosynthesis initiation (animals and fungi, cytoplasm)	PWY-5966-1	fatty acid biosynthesis initiation (animals and fungi, cytoplasm)
Biosynthesis	Fatty Acid and Lipid Biosynthesis	Fatty Acid Biosynthesis	Fatty Acid Biosynthesis Initiation	fatty acid biosynthesis initiation (bacteria and plants)	fatty acid biosynthesis initiation (bacteria and plants)	fatty acid biosynthesis initiation (bacteria and plants)	fatty acid biosynthesis initiation (bacteria and plants)	PWY-4381	fatty acid biosynthesis initiation (bacteria and plants)
Biosynthesis	Fatty Acid and Lipid Biosynthesis	Fatty Acid Biosynthesis	Fatty Acid Biosynthesis Initiation	fatty acid biosynthesis initiation (mitochondria)	fatty acid biosynthesis initiation (mitochondria)	fatty acid biosynthesis initiation (mitochondria)	fatty acid biosynthesis initiation (mitochondria)	PWY66-429	fatty acid biosynthesis initiation (mitochondria)
Biosynthesis	Fatty Acid and Lipid Biosynthesis	Fatty Acid Biosynthesis	Fatty Acid Biosynthesis Initiation	fatty acid biosynthesis initiation (plant mitochondria)	fatty acid biosynthesis initiation (plant mitochondria)	fatty acid biosynthesis initiation (plant mitochondria)	fatty acid biosynthesis initiation (plant mitochondria)	PWY-6799	fatty acid biosynthesis initiation (plant mitochondria)
Biosynthesis	Fatty Acid and Lipid Biosynthesis	Fatty Acid Biosynthesis	Hydroxylated Fatty Acid Biosynthesis	hydroxylated fatty acid biosynthesis (plants)	hydroxylated fatty acid biosynthesis (plants)	hydroxylated fatty acid biosynthesis (plants)	hydroxylated fatty acid biosynthesis (plants)	PWY-6433	hydroxylated fatty acid biosynthesis (plants)
Biosynthesis	Fatty Acid and Lipid Biosynthesis	Fatty Acid Biosynthesis	Hydroxylated Fatty Acid Biosynthesis	poly-hydroxy fatty acids biosynthesis	poly-hydroxy fatty acids biosynthesis	poly-hydroxy fatty acids biosynthesis	poly-hydroxy fatty acids biosynthesis	PWY-6710	poly-hydroxy fatty acids biosynthesis
Biosynthesis	Fatty Acid and Lipid Biosynthesis	Fatty Acid Biosynthesis	Hydroxylated Fatty Acid Biosynthesis	ricinoleate biosynthesis	ricinoleate biosynthesis	ricinoleate biosynthesis	ricinoleate biosynthesis	PWY-7618	ricinoleate biosynthesis
Biosynthesis	Fatty Acid and Lipid Biosynthesis	Fatty Acid Biosynthesis	Palmitate Biosynthesis	palmitate biosynthesis (animals and fungi, cytoplasm)	palmitate biosynthesis (animals and fungi, cytoplasm)	palmitate biosynthesis (animals and fungi, cytoplasm)	palmitate biosynthesis (animals and fungi, cytoplasm)	PWY-5994	palmitate biosynthesis (animals and fungi, cytoplasm)
Biosynthesis	Fatty Acid and Lipid Biosynthesis	Fatty Acid Biosynthesis	Palmitate Biosynthesis	palmitate biosynthesis II (bacteria and plant cytoplasm)	palmitate biosynthesis II (bacteria and plant cytoplasm)	palmitate biosynthesis II (bacteria and plant cytoplasm)	palmitate biosynthesis II (bacteria and plant cytoplasm)	PWY-5971	palmitate biosynthesis II (bacteria and plant cytoplasm)
Biosynthesis	Fatty Acid and Lipid Biosynthesis	Fatty Acid Biosynthesis	Stearate Biosynthesis	stearate biosynthesis I (animals)	stearate biosynthesis I (animals)	stearate biosynthesis I (animals)	stearate biosynthesis I (animals)	PWY-5972	stearate biosynthesis I (animals)
Biosynthesis	Fatty Acid and Lipid Biosynthesis	Fatty Acid Biosynthesis	Stearate Biosynthesis	stearate biosynthesis II (bacteria and plants)	stearate biosynthesis II (bacteria and plants)	stearate biosynthesis II (bacteria and plants)	stearate biosynthesis II (bacteria and plants)	PWY-5989	stearate biosynthesis II (bacteria and plants)
Biosynthesis	Fatty Acid and Lipid Biosynthesis	Fatty Acid Biosynthesis	Stearate Biosynthesis	stearate biosynthesis III (fungi)	stearate biosynthesis III (fungi)	stearate biosynthesis III (fungi)	stearate biosynthesis III (fungi)	PWY3O-355	stearate biosynthesis III (fungi)
Biosynthesis	Fatty Acid and Lipid Biosynthesis	Fatty Acid Biosynthesis	Unsaturated Fatty Acid Biosynthesis	α-Linolenate Biosynthesis	α-linolenate biosynthesis I (plants and red algae)	α-linolenate biosynthesis I (plants and red algae)	α-linolenate biosynthesis I (plants and red algae)	PWY-5997	α-linolenate biosynthesis I (plants and red algae)
Biosynthesis	Fatty Acid and Lipid Biosynthesis	Fatty Acid Biosynthesis	Unsaturated Fatty Acid Biosynthesis	α-Linolenate Biosynthesis	α-linolenate biosynthesis II (cyanobacteria)	α-linolenate biosynthesis II (cyanobacteria)	α-linolenate biosynthesis II (cyanobacteria)	PWY-7598	α-linolenate biosynthesis II (cyanobacteria)
Biosynthesis	Fatty Acid and Lipid Biosynthesis	Fatty Acid Biosynthesis	Unsaturated Fatty Acid Biosynthesis	γ-Linolenate Biosynthesis	γ-linolenate biosynthesis I (plants)	γ-linolenate biosynthesis I (plants)	γ-linolenate biosynthesis I (plants)	PWY-5998	γ-linolenate biosynthesis I (plants)
Biosynthesis	Fatty Acid and Lipid Biosynthesis	Fatty Acid Biosynthesis	Unsaturated Fatty Acid Biosynthesis	γ-Linolenate Biosynthesis	γ-linolenate biosynthesis II (animals)	γ-linolenate biosynthesis II (animals)	γ-linolenate biosynthesis II (animals)	PWY-6000	γ-linolenate biosynthesis II (animals)
Biosynthesis	Fatty Acid and Lipid Biosynthesis	Fatty Acid Biosynthesis	Unsaturated Fatty Acid Biosynthesis	γ-Linolenate Biosynthesis	γ-linolenate biosynthesis III (cyanobacteria)	γ-linolenate biosynthesis III (cyanobacteria)	γ-linolenate biosynthesis III (cyanobacteria)	PWY-7594	γ-linolenate biosynthesis III (cyanobacteria)
Biosynthesis	Fatty Acid and Lipid Biosynthesis	Fatty Acid Biosynthesis	Unsaturated Fatty Acid Biosynthesis	(5Z)-dodecenoate Biosynthesis	(5Z)-dodecenoate biosynthesis I	(5Z)-dodecenoate biosynthesis I	(5Z)-dodecenoate biosynthesis I	PWY0-862	(5Z)-dodecenoate biosynthesis I
Biosynthesis	Fatty Acid and Lipid Biosynthesis	Fatty Acid Biosynthesis	Unsaturated Fatty Acid Biosynthesis	(5Z)-dodecenoate Biosynthesis	(5Z)-dodecenoate biosynthesis II	(5Z)-dodecenoate biosynthesis II	(5Z)-dodecenoate biosynthesis II	PWY-7858	(5Z)-dodecenoate biosynthesis II
Biosynthesis	Fatty Acid and Lipid Biosynthesis	Fatty Acid Biosynthesis	Unsaturated Fatty Acid Biosynthesis	Fatty Acid Containing acetylenic bond Biosynthesis	5-hexynoate biosynthesis	5-hexynoate biosynthesis	5-hexynoate biosynthesis	PWY-7641	5-hexynoate biosynthesis
Biosynthesis	Fatty Acid and Lipid Biosynthesis	Fatty Acid Biosynthesis	Unsaturated Fatty Acid Biosynthesis	Fatty Acid Containing acetylenic bond Biosynthesis	crepenynate biosynthesis	crepenynate biosynthesis	crepenynate biosynthesis	PWY-6013	crepenynate biosynthesis
Biosynthesis	Fatty Acid and Lipid Biosynthesis	Fatty Acid Biosynthesis	Unsaturated Fatty Acid Biosynthesis	Fatty Acid Containing acetylenic bond Biosynthesis	dicranin biosynthesis	dicranin biosynthesis	dicranin biosynthesis	PWY-6603	dicranin biosynthesis
Biosynthesis	Fatty Acid and Lipid Biosynthesis	Fatty Acid Biosynthesis	Unsaturated Fatty Acid Biosynthesis	Linoleate Biosynthesis	linoleate biosynthesis I (plants)	linoleate biosynthesis I (plants)	linoleate biosynthesis I (plants)	PWY-5995	linoleate biosynthesis I (plants)
Biosynthesis	Fatty Acid and Lipid Biosynthesis	Fatty Acid Biosynthesis	Unsaturated Fatty Acid Biosynthesis	Linoleate Biosynthesis	linoleate biosynthesis II (animals)	linoleate biosynthesis II (animals)	linoleate biosynthesis II (animals)	PWY-6001	linoleate biosynthesis II (animals)
Biosynthesis	Fatty Acid and Lipid Biosynthesis	Fatty Acid Biosynthesis	Unsaturated Fatty Acid Biosynthesis	Linoleate Biosynthesis	linoleate biosynthesis III (cyanobacteria)	linoleate biosynthesis III (cyanobacteria)	linoleate biosynthesis III (cyanobacteria)	PWY-7593	linoleate biosynthesis III (cyanobacteria)
Biosynthesis	Fatty Acid and Lipid Biosynthesis	Fatty Acid Biosynthesis	Unsaturated Fatty Acid Biosynthesis	Oleate Biosynthesis	oleate biosynthesis I (plants)	oleate biosynthesis I (plants)	oleate biosynthesis I (plants)	PWY-5147	oleate biosynthesis I (plants)
Biosynthesis	Fatty Acid and Lipid Biosynthesis	Fatty Acid Biosynthesis	Unsaturated Fatty Acid Biosynthesis	Oleate Biosynthesis	oleate biosynthesis II (animals and fungi)	oleate biosynthesis II (animals and fungi)	oleate biosynthesis II (animals and fungi)	PWY-5996	oleate biosynthesis II (animals and fungi)
Biosynthesis	Fatty Acid and Lipid Biosynthesis	Fatty Acid Biosynthesis	Unsaturated Fatty Acid Biosynthesis	Oleate Biosynthesis	oleate biosynthesis III (cyanobacteria)	oleate biosynthesis III (cyanobacteria)	oleate biosynthesis III (cyanobacteria)	PWY-7587	oleate biosynthesis III (cyanobacteria)
Biosynthesis	Fatty Acid and Lipid Biosynthesis	Fatty Acid Biosynthesis	Unsaturated Fatty Acid Biosynthesis	Oleate Biosynthesis	oleate biosynthesis IV (anaerobic)	oleate biosynthesis IV (anaerobic)	oleate biosynthesis IV (anaerobic)	PWY-7664	oleate biosynthesis IV (anaerobic)
Biosynthesis	Fatty Acid and Lipid Biosynthesis	Fatty Acid Biosynthesis	Unsaturated Fatty Acid Biosynthesis	Palmitoleate Biosynthesis	palmitoleate biosynthesis I (from (5Z)-dodec-5-enoate)	palmitoleate biosynthesis I (from (5Z)-dodec-5-enoate)	palmitoleate biosynthesis I (from (5Z)-dodec-5-enoate)	PWY-6282	palmitoleate biosynthesis I (from (5Z)-dodec-5-enoate)
Biosynthesis	Fatty Acid and Lipid Biosynthesis	Fatty Acid Biosynthesis	Unsaturated Fatty Acid Biosynthesis	Palmitoleate Biosynthesis	palmitoleate biosynthesis II (plants and bacteria)	palmitoleate biosynthesis II (plants and bacteria)	palmitoleate biosynthesis II (plants and bacteria)	PWY-5366	palmitoleate biosynthesis II (plants and bacteria)
Biosynthesis	Fatty Acid and Lipid Biosynthesis	Fatty Acid Biosynthesis	Unsaturated Fatty Acid Biosynthesis	Palmitoleate Biosynthesis	palmitoleate biosynthesis III (cyanobacteria)	palmitoleate biosynthesis III (cyanobacteria)	palmitoleate biosynthesis III (cyanobacteria)	PWY-7589	palmitoleate biosynthesis III (cyanobacteria)
Biosynthesis	Fatty Acid and Lipid Biosynthesis	Fatty Acid Biosynthesis	Unsaturated Fatty Acid Biosynthesis	Polyunsaturated Fatty Acid Biosynthesis	Arachidonate Biosynthesis	arachidonate biosynthesis I (6-desaturase, lower eukaryotes)	arachidonate biosynthesis I (6-desaturase, lower eukaryotes)	PWY-5353	arachidonate biosynthesis I (6-desaturase, lower eukaryotes)
Biosynthesis	Fatty Acid and Lipid Biosynthesis	Fatty Acid Biosynthesis	Unsaturated Fatty Acid Biosynthesis	Polyunsaturated Fatty Acid Biosynthesis	Arachidonate Biosynthesis	arachidonate biosynthesis II (bacteria)	arachidonate biosynthesis II (bacteria)	PWY-7583	arachidonate biosynthesis II (bacteria)
Biosynthesis	Fatty Acid and Lipid Biosynthesis	Fatty Acid Biosynthesis	Unsaturated Fatty Acid Biosynthesis	Polyunsaturated Fatty Acid Biosynthesis	Arachidonate Biosynthesis	arachidonate biosynthesis III (6-desaturase, mammals)	arachidonate biosynthesis III (6-desaturase, mammals)	PWY-7592	arachidonate biosynthesis III (6-desaturase, mammals)
Biosynthesis	Fatty Acid and Lipid Biosynthesis	Fatty Acid Biosynthesis	Unsaturated Fatty Acid Biosynthesis	Polyunsaturated Fatty Acid Biosynthesis	Arachidonate Biosynthesis	arachidonate biosynthesis IV (8-detaturase, lower eukaryotes)	arachidonate biosynthesis IV (8-detaturase, lower eukaryotes)	PWY-7601	arachidonate biosynthesis IV (8-detaturase, lower eukaryotes)
Biosynthesis	Fatty Acid and Lipid Biosynthesis	Fatty Acid Biosynthesis	Unsaturated Fatty Acid Biosynthesis	Polyunsaturated Fatty Acid Biosynthesis	Arachidonate Biosynthesis	arachidonate biosynthesis V (8-detaturase, mammals)	arachidonate biosynthesis V (8-detaturase, mammals)	PWY-7725	arachidonate biosynthesis V (8-detaturase, mammals)
Biosynthesis	Fatty Acid and Lipid Biosynthesis	Fatty Acid Biosynthesis	Unsaturated Fatty Acid Biosynthesis	Polyunsaturated Fatty Acid Biosynthesis	Conjugated Fatty Acid Biosynthesis	α-eleostearate biosynthesis	α-eleostearate biosynthesis	PWY-5375	α-eleostearate biosynthesis
Biosynthesis	Fatty Acid and Lipid Biosynthesis	Fatty Acid Biosynthesis	Unsaturated Fatty Acid Biosynthesis	Polyunsaturated Fatty Acid Biosynthesis	Conjugated Fatty Acid Biosynthesis	calendate biosynthesis	calendate biosynthesis	PWY-5373	calendate biosynthesis
Biosynthesis	Fatty Acid and Lipid Biosynthesis	Fatty Acid Biosynthesis	Unsaturated Fatty Acid Biosynthesis	Polyunsaturated Fatty Acid Biosynthesis	Conjugated Fatty Acid Biosynthesis	dimorphecolate biosynthesis	dimorphecolate biosynthesis	PWY-5368	dimorphecolate biosynthesis
Biosynthesis	Fatty Acid and Lipid Biosynthesis	Fatty Acid Biosynthesis	Unsaturated Fatty Acid Biosynthesis	Polyunsaturated Fatty Acid Biosynthesis	Conjugated Fatty Acid Biosynthesis	punicate biosynthesis	punicate biosynthesis	PWY-5374	punicate biosynthesis
Biosynthesis	Fatty Acid and Lipid Biosynthesis	Fatty Acid Biosynthesis	Unsaturated Fatty Acid Biosynthesis	Polyunsaturated Fatty Acid Biosynthesis	Docosahexaenoate Biosynthesis	docosahexaenoate biosynthesis I (lower eukaryotes)	docosahexaenoate biosynthesis I (lower eukaryotes)	PWY-7053	docosahexaenoate biosynthesis I (lower eukaryotes)
Biosynthesis	Fatty Acid and Lipid Biosynthesis	Fatty Acid Biosynthesis	Unsaturated Fatty Acid Biosynthesis	Polyunsaturated Fatty Acid Biosynthesis	Docosahexaenoate Biosynthesis	docosahexaenoate biosynthesis II (bacteria)	docosahexaenoate biosynthesis II (bacteria)	PWY-7585	docosahexaenoate biosynthesis II (bacteria)
Biosynthesis	Fatty Acid and Lipid Biosynthesis	Fatty Acid Biosynthesis	Unsaturated Fatty Acid Biosynthesis	Polyunsaturated Fatty Acid Biosynthesis	Docosahexaenoate Biosynthesis	docosahexaenoate biosynthesis III (6-desaturase, mammals)	docosahexaenoate biosynthesis III (6-desaturase, mammals)	PWY-7606	docosahexaenoate biosynthesis III (6-desaturase, mammals)
Biosynthesis	Fatty Acid and Lipid Biosynthesis	Fatty Acid Biosynthesis	Unsaturated Fatty Acid Biosynthesis	Polyunsaturated Fatty Acid Biosynthesis	Docosahexaenoate Biosynthesis	docosahexaenoate biosynthesis IV (4-desaturase, mammals)	docosahexaenoate biosynthesis IV (4-desaturase, mammals)	PWY-7727	docosahexaenoate biosynthesis IV (4-desaturase, mammals)
Biosynthesis	Fatty Acid and Lipid Biosynthesis	Fatty Acid Biosynthesis	Unsaturated Fatty Acid Biosynthesis	Polyunsaturated Fatty Acid Biosynthesis	Icosapentaenoate Biosynthesis	icosapentaenoate biosynthesis I (lower eukaryotes)	icosapentaenoate biosynthesis I (lower eukaryotes)	PWY-6958	icosapentaenoate biosynthesis I (lower eukaryotes)
Biosynthesis	Fatty Acid and Lipid Biosynthesis	Fatty Acid Biosynthesis	Unsaturated Fatty Acid Biosynthesis	Polyunsaturated Fatty Acid Biosynthesis	Icosapentaenoate Biosynthesis	icosapentaenoate biosynthesis II (6-desaturase, mammals)	icosapentaenoate biosynthesis II (6-desaturase, mammals)	PWY-7049	icosapentaenoate biosynthesis II (6-desaturase, mammals)
Biosynthesis	Fatty Acid and Lipid Biosynthesis	Fatty Acid Biosynthesis	Unsaturated Fatty Acid Biosynthesis	Polyunsaturated Fatty Acid Biosynthesis	Icosapentaenoate Biosynthesis	icosapentaenoate biosynthesis III (8-desaturase, mammals)	icosapentaenoate biosynthesis III (8-desaturase, mammals)	PWY-7724	icosapentaenoate biosynthesis III (8-desaturase, mammals)
Biosynthesis	Fatty Acid and Lipid Biosynthesis	Fatty Acid Biosynthesis	Unsaturated Fatty Acid Biosynthesis	Polyunsaturated Fatty Acid Biosynthesis	Icosapentaenoate Biosynthesis	icosapentaenoate biosynthesis IV (bacteria)	icosapentaenoate biosynthesis IV (bacteria)	PWY-7050	icosapentaenoate biosynthesis IV (bacteria)
Biosynthesis	Fatty Acid and Lipid Biosynthesis	Fatty Acid Biosynthesis	Unsaturated Fatty Acid Biosynthesis	Polyunsaturated Fatty Acid Biosynthesis	Icosapentaenoate Biosynthesis	icosapentaenoate biosynthesis V (8-desaturase, lower eukaryotes)	icosapentaenoate biosynthesis V (8-desaturase, lower eukaryotes)	PWY-7602	icosapentaenoate biosynthesis V (8-desaturase, lower eukaryotes)
Biosynthesis	Fatty Acid and Lipid Biosynthesis	Fatty Acid Biosynthesis	Unsaturated Fatty Acid Biosynthesis	Polyunsaturated Fatty Acid Biosynthesis	Icosapentaenoate Biosynthesis	icosapentaenoate biosynthesis VI (fungi)	icosapentaenoate biosynthesis VI (fungi)	PWY-6940	icosapentaenoate biosynthesis VI (fungi)
Biosynthesis	Fatty Acid and Lipid Biosynthesis	Fatty Acid Biosynthesis	Unsaturated Fatty Acid Biosynthesis	Polyunsaturated Fatty Acid Biosynthesis	(4Z,7Z,10Z,13Z,16Z)-docosa-4,7,10,13,16-pentaenoate biosynthesis II (4-desaturase)	(4Z,7Z,10Z,13Z,16Z)-docosa-4,7,10,13,16-pentaenoate biosynthesis II (4-desaturase)	(4Z,7Z,10Z,13Z,16Z)-docosa-4,7,10,13,16-pentaenoate biosynthesis II (4-desaturase)	PWY-7728	(4Z,7Z,10Z,13Z,16Z)-docosa-4,7,10,13,16-pentaenoate biosynthesis II (4-desaturase)
Biosynthesis	Fatty Acid and Lipid Biosynthesis	Fatty Acid Biosynthesis	Unsaturated Fatty Acid Biosynthesis	Polyunsaturated Fatty Acid Biosynthesis	(4Z,7Z,10Z,13Z,16Z)-docosapentaenoate biosynthesis (6-desaturase)	(4Z,7Z,10Z,13Z,16Z)-docosapentaenoate biosynthesis (6-desaturase)	(4Z,7Z,10Z,13Z,16Z)-docosapentaenoate biosynthesis (6-desaturase)	PWY-7726	(4Z,7Z,10Z,13Z,16Z)-docosapentaenoate biosynthesis (6-desaturase)
Biosynthesis	Fatty Acid and Lipid Biosynthesis	Fatty Acid Biosynthesis	Unsaturated Fatty Acid Biosynthesis	Polyunsaturated Fatty Acid Biosynthesis	(7Z,10Z,13Z)-hexadecatrienoate biosynthesis	(7Z,10Z,13Z)-hexadecatrienoate biosynthesis	(7Z,10Z,13Z)-hexadecatrienoate biosynthesis	PWY-7590	(7Z,10Z,13Z)-hexadecatrienoate biosynthesis
Biosynthesis	Fatty Acid and Lipid Biosynthesis	Fatty Acid Biosynthesis	Unsaturated Fatty Acid Biosynthesis	Polyunsaturated Fatty Acid Biosynthesis	crepenynate biosynthesis	crepenynate biosynthesis	crepenynate biosynthesis	PWY-6013	crepenynate biosynthesis
Biosynthesis	Fatty Acid and Lipid Biosynthesis	Fatty Acid Biosynthesis	Unsaturated Fatty Acid Biosynthesis	Polyunsaturated Fatty Acid Biosynthesis	dicranin biosynthesis	dicranin biosynthesis	dicranin biosynthesis	PWY-6603	dicranin biosynthesis
Biosynthesis	Fatty Acid and Lipid Biosynthesis	Fatty Acid Biosynthesis	Unsaturated Fatty Acid Biosynthesis	Polyunsaturated Fatty Acid Biosynthesis	juniperonate biosynthesis	juniperonate biosynthesis	juniperonate biosynthesis	PWY-7619	juniperonate biosynthesis
Biosynthesis	Fatty Acid and Lipid Biosynthesis	Fatty Acid Biosynthesis	Unsaturated Fatty Acid Biosynthesis	Polyunsaturated Fatty Acid Biosynthesis	pinolenate and coniferonate biosynthesis	pinolenate and coniferonate biosynthesis	pinolenate and coniferonate biosynthesis	PWY-7152	pinolenate and coniferonate biosynthesis
Biosynthesis	Fatty Acid and Lipid Biosynthesis	Fatty Acid Biosynthesis	Unsaturated Fatty Acid Biosynthesis	Polyunsaturated Fatty Acid Biosynthesis	sciadonate biosynthesis	sciadonate biosynthesis	sciadonate biosynthesis	PWY-6598	sciadonate biosynthesis
Biosynthesis	Fatty Acid and Lipid Biosynthesis	Fatty Acid Biosynthesis	Unsaturated Fatty Acid Biosynthesis	Polyunsaturated Fatty Acid Biosynthesis	stearidonate biosynthesis (cyanobacteria)	stearidonate biosynthesis (cyanobacteria)	stearidonate biosynthesis (cyanobacteria)	PWY-7595	stearidonate biosynthesis (cyanobacteria)
Biosynthesis	Fatty Acid and Lipid Biosynthesis	Fatty Acid Biosynthesis	Unsaturated Fatty Acid Biosynthesis	Polyunsaturated Fatty Acid Biosynthesis	superpathway of stearidonate biosynthesis (cyanobacteria)	superpathway of stearidonate biosynthesis (cyanobacteria)	superpathway of stearidonate biosynthesis (cyanobacteria)	PWY-7596	superpathway of stearidonate biosynthesis (cyanobacteria)
Biosynthesis	Fatty Acid and Lipid Biosynthesis	Fatty Acid Biosynthesis	Unsaturated Fatty Acid Biosynthesis	Vernolate Biosynthesis	vernolate biosynthesis I	vernolate biosynthesis I	vernolate biosynthesis I	PWY-6014	vernolate biosynthesis I
Biosynthesis	Fatty Acid and Lipid Biosynthesis	Fatty Acid Biosynthesis	Unsaturated Fatty Acid Biosynthesis	Vernolate Biosynthesis	vernolate biosynthesis II	vernolate biosynthesis II	vernolate biosynthesis II	PWY-7634	vernolate biosynthesis II
Biosynthesis	Fatty Acid and Lipid Biosynthesis	Fatty Acid Biosynthesis	Unsaturated Fatty Acid Biosynthesis	Vernolate Biosynthesis	vernolate biosynthesis III	vernolate biosynthesis III	vernolate biosynthesis III	PWY-6917	vernolate biosynthesis III
Biosynthesis	Fatty Acid and Lipid Biosynthesis	Fatty Acid Biosynthesis	Unsaturated Fatty Acid Biosynthesis	(5Z)-icosenoate biosynthesis	(5Z)-icosenoate biosynthesis	(5Z)-icosenoate biosynthesis	(5Z)-icosenoate biosynthesis	PWY-5361	(5Z)-icosenoate biosynthesis
Biosynthesis	Fatty Acid and Lipid Biosynthesis	Fatty Acid Biosynthesis	Unsaturated Fatty Acid Biosynthesis	10,13-epoxy-11-methyl-octadecadienoate biosynthesis	10,13-epoxy-11-methyl-octadecadienoate biosynthesis	10,13-epoxy-11-methyl-octadecadienoate biosynthesis	10,13-epoxy-11-methyl-octadecadienoate biosynthesis	PWY-7691	10,13-epoxy-11-methyl-octadecadienoate biosynthesis
Biosynthesis	Fatty Acid and Lipid Biosynthesis	Fatty Acid Biosynthesis	Unsaturated Fatty Acid Biosynthesis	cis-vaccenate biosynthesis	cis-vaccenate biosynthesis	cis-vaccenate biosynthesis	cis-vaccenate biosynthesis	PWY-5973	cis-vaccenate biosynthesis
Biosynthesis	Fatty Acid and Lipid Biosynthesis	Fatty Acid Biosynthesis	Unsaturated Fatty Acid Biosynthesis	gondoate biosynthesis (anaerobic)	gondoate biosynthesis (anaerobic)	gondoate biosynthesis (anaerobic)	gondoate biosynthesis (anaerobic)	PWY-7663	gondoate biosynthesis (anaerobic)
Biosynthesis	Fatty Acid and Lipid Biosynthesis	Fatty Acid Biosynthesis	Unsaturated Fatty Acid Biosynthesis	petroselinate biosynthesis	petroselinate biosynthesis	petroselinate biosynthesis	petroselinate biosynthesis	PWY-5367	petroselinate biosynthesis
Biosynthesis	Fatty Acid and Lipid Biosynthesis	Fatty Acid Biosynthesis	Unsaturated Fatty Acid Biosynthesis	ricinoleate biosynthesis	ricinoleate biosynthesis	ricinoleate biosynthesis	ricinoleate biosynthesis	PWY-7618	ricinoleate biosynthesis
Biosynthesis	Fatty Acid and Lipid Biosynthesis	Fatty Acid Biosynthesis	Unsaturated Fatty Acid Biosynthesis	sapienate biosynthesis	sapienate biosynthesis	sapienate biosynthesis	sapienate biosynthesis	PWY-5362	sapienate biosynthesis
Biosynthesis	Fatty Acid and Lipid Biosynthesis	Fatty Acid Biosynthesis	Unsaturated Fatty Acid Biosynthesis	superpathway of unsaturated fatty acids biosynthesis (E. coli)	superpathway of unsaturated fatty acids biosynthesis (E. coli)	superpathway of unsaturated fatty acids biosynthesis (E. coli)	superpathway of unsaturated fatty acids biosynthesis (E. coli)	PWY-6284	superpathway of unsaturated fatty acids biosynthesis (E. coli)
Biosynthesis	Fatty Acid and Lipid Biosynthesis	Fatty Acid Biosynthesis	fatty acid elongation -- saturated	fatty acid elongation -- saturated	fatty acid elongation -- saturated	fatty acid elongation -- saturated	fatty acid elongation -- saturated	FASYN-ELONG-PWY	fatty acid elongation -- saturated
Biosynthesis	Fatty Acid and Lipid Biosynthesis	Fatty Acid Biosynthesis	fatty acid salvage	fatty acid salvage	fatty acid salvage	fatty acid salvage	fatty acid salvage	PWY-7094	fatty acid salvage
Biosynthesis	Fatty Acid and Lipid Biosynthesis	Fatty Acid Biosynthesis	mycolate biosynthesis	mycolate biosynthesis	mycolate biosynthesis	mycolate biosynthesis	mycolate biosynthesis	PWYG-321	mycolate biosynthesis
Biosynthesis	Fatty Acid and Lipid Biosynthesis	Fatty Acid Biosynthesis	myristate biosynthesis (mitochondria)	myristate biosynthesis (mitochondria)	myristate biosynthesis (mitochondria)	myristate biosynthesis (mitochondria)	myristate biosynthesis (mitochondria)	PWY66-430	myristate biosynthesis (mitochondria)
Biosynthesis	Fatty Acid and Lipid Biosynthesis	Fatty Acid Biosynthesis	octanoyl-[acyl-carrier protein] biosynthesis (mitochondria, yeast)	octanoyl-[acyl-carrier protein] biosynthesis (mitochondria, yeast)	octanoyl-[acyl-carrier protein] biosynthesis (mitochondria, yeast)	octanoyl-[acyl-carrier protein] biosynthesis (mitochondria, yeast)	octanoyl-[acyl-carrier protein] biosynthesis (mitochondria, yeast)	PWY-7388	octanoyl-[acyl-carrier protein] biosynthesis (mitochondria, yeast)
Biosynthesis	Fatty Acid and Lipid Biosynthesis	Fatty Acid Biosynthesis	superpathway of fatty acid biosynthesis I (E. coli)	superpathway of fatty acid biosynthesis I (E. coli)	superpathway of fatty acid biosynthesis I (E. coli)	superpathway of fatty acid biosynthesis I (E. coli)	superpathway of fatty acid biosynthesis I (E. coli)	PWY0-881	superpathway of fatty acid biosynthesis I (E. coli)
Biosynthesis	Fatty Acid and Lipid Biosynthesis	Fatty Acid Biosynthesis	superpathway of fatty acid biosynthesis II (plant)	superpathway of fatty acid biosynthesis II (plant)	superpathway of fatty acid biosynthesis II (plant)	superpathway of fatty acid biosynthesis II (plant)	superpathway of fatty acid biosynthesis II (plant)	PWY-5156	superpathway of fatty acid biosynthesis II (plant)
Biosynthesis	Fatty Acid and Lipid Biosynthesis	Fatty Acid Biosynthesis	superpathway of fatty acid biosynthesis initiation (E. coli)	superpathway of fatty acid biosynthesis initiation (E. coli)	superpathway of fatty acid biosynthesis initiation (E. coli)	superpathway of fatty acid biosynthesis initiation (E. coli)	superpathway of fatty acid biosynthesis initiation (E. coli)	FASYN-INITIAL-PWY	superpathway of fatty acid biosynthesis initiation (E. coli)
Biosynthesis	Fatty Acid and Lipid Biosynthesis	Fatty Acid Biosynthesis	superpathway of fatty acids biosynthesis (E. coli)	superpathway of fatty acids biosynthesis (E. coli)	superpathway of fatty acids biosynthesis (E. coli)	superpathway of fatty acids biosynthesis (E. coli)	superpathway of fatty acids biosynthesis (E. coli)	PWY-6285	superpathway of fatty acids biosynthesis (E. coli)
Biosynthesis	Fatty Acid and Lipid Biosynthesis	Fatty Acid Biosynthesis	superpathway of mycolate biosynthesis	superpathway of mycolate biosynthesis	superpathway of mycolate biosynthesis	superpathway of mycolate biosynthesis	superpathway of mycolate biosynthesis	PWY-6113	superpathway of mycolate biosynthesis
Biosynthesis	Fatty Acid and Lipid Biosynthesis	Fatty Acid Biosynthesis	ultra-long-chain fatty acid biosynthesis	ultra-long-chain fatty acid biosynthesis	ultra-long-chain fatty acid biosynthesis	ultra-long-chain fatty acid biosynthesis	ultra-long-chain fatty acid biosynthesis	PWY-8041	ultra-long-chain fatty acid biosynthesis
Biosynthesis	Fatty Acid and Lipid Biosynthesis	Fatty Acid Biosynthesis	very long chain fatty acid biosynthesis I	very long chain fatty acid biosynthesis I	very long chain fatty acid biosynthesis I	very long chain fatty acid biosynthesis I	very long chain fatty acid biosynthesis I	PWY-5080	very long chain fatty acid biosynthesis I
Biosynthesis	Fatty Acid and Lipid Biosynthesis	Fatty Acid Biosynthesis	very long chain fatty acid biosynthesis II	very long chain fatty acid biosynthesis II	very long chain fatty acid biosynthesis II	very long chain fatty acid biosynthesis II	very long chain fatty acid biosynthesis II	PWY-7036	very long chain fatty acid biosynthesis II
Biosynthesis	Fatty Acid and Lipid Biosynthesis	Glycolipid Biosynthesis	α-diglucosyldiacylglycerol biosynthesis	α-diglucosyldiacylglycerol biosynthesis	α-diglucosyldiacylglycerol biosynthesis	α-diglucosyldiacylglycerol biosynthesis	α-diglucosyldiacylglycerol biosynthesis	PWY-7684	α-diglucosyldiacylglycerol biosynthesis
Biosynthesis	Fatty Acid and Lipid Biosynthesis	Glycolipid Biosynthesis	galactolipid biosynthesis I	galactolipid biosynthesis I	galactolipid biosynthesis I	galactolipid biosynthesis I	galactolipid biosynthesis I	PWY-401	galactolipid biosynthesis I
Biosynthesis	Fatty Acid and Lipid Biosynthesis	Glycolipid Biosynthesis	galactolipid biosynthesis II	galactolipid biosynthesis II	galactolipid biosynthesis II	galactolipid biosynthesis II	galactolipid biosynthesis II	PWY-7666	galactolipid biosynthesis II
Biosynthesis	Fatty Acid and Lipid Biosynthesis	Glycolipid Biosynthesis	glucosylglycerol biosynthesis	glucosylglycerol biosynthesis	glucosylglycerol biosynthesis	glucosylglycerol biosynthesis	glucosylglycerol biosynthesis	PWY-7902	glucosylglycerol biosynthesis
Biosynthesis	Fatty Acid and Lipid Biosynthesis	Glycolipid Biosynthesis	glycolipid desaturation	glycolipid desaturation	glycolipid desaturation	glycolipid desaturation	glycolipid desaturation	PWY-782	glycolipid desaturation
Biosynthesis	Fatty Acid and Lipid Biosynthesis	Glycolipid Biosynthesis	phosphatidylinositol mannoside biosynthesis	phosphatidylinositol mannoside biosynthesis	phosphatidylinositol mannoside biosynthesis	phosphatidylinositol mannoside biosynthesis	phosphatidylinositol mannoside biosynthesis	PWY-7885	phosphatidylinositol mannoside biosynthesis
Biosynthesis	Fatty Acid and Lipid Biosynthesis	Glycolipid Biosynthesis	polyacyltrehalose biosynthesis	polyacyltrehalose biosynthesis	polyacyltrehalose biosynthesis	polyacyltrehalose biosynthesis	polyacyltrehalose biosynthesis	PWY-7738	polyacyltrehalose biosynthesis
Biosynthesis	Fatty Acid and Lipid Biosynthesis	Glycolipid Biosynthesis	rhamnolipid biosynthesis	rhamnolipid biosynthesis	rhamnolipid biosynthesis	rhamnolipid biosynthesis	rhamnolipid biosynthesis	PWY-6648	rhamnolipid biosynthesis
Biosynthesis	Fatty Acid and Lipid Biosynthesis	Phospholipid Biosynthesis	Cardiolipin Biosynthesis	cardiolipin and phosphatidylethanolamine biosynthesis (Xanthomonas)	cardiolipin and phosphatidylethanolamine biosynthesis (Xanthomonas)	cardiolipin and phosphatidylethanolamine biosynthesis (Xanthomonas)	cardiolipin and phosphatidylethanolamine biosynthesis (Xanthomonas)	PWY-7509	cardiolipin and phosphatidylethanolamine biosynthesis (Xanthomonas)
Biosynthesis	Fatty Acid and Lipid Biosynthesis	Phospholipid Biosynthesis	Cardiolipin Biosynthesis	cardiolipin biosynthesis I	cardiolipin biosynthesis I	cardiolipin biosynthesis I	cardiolipin biosynthesis I	PWY-5668	cardiolipin biosynthesis I
Biosynthesis	Fatty Acid and Lipid Biosynthesis	Phospholipid Biosynthesis	Cardiolipin Biosynthesis	cardiolipin biosynthesis II	cardiolipin biosynthesis II	cardiolipin biosynthesis II	cardiolipin biosynthesis II	PWY-5269	cardiolipin biosynthesis II
Biosynthesis	Fatty Acid and Lipid Biosynthesis	Phospholipid Biosynthesis	Cardiolipin Biosynthesis	cardiolipin biosynthesis III	cardiolipin biosynthesis III	cardiolipin biosynthesis III	cardiolipin biosynthesis III	PWY0-1545	cardiolipin biosynthesis III
Biosynthesis	Fatty Acid and Lipid Biosynthesis	Phospholipid Biosynthesis	CDP-diacylglycerol Biosynthesis	CDP-diacylglycerol biosynthesis I	CDP-diacylglycerol biosynthesis I	CDP-diacylglycerol biosynthesis I	CDP-diacylglycerol biosynthesis I	PWY-5667	CDP-diacylglycerol biosynthesis I
Biosynthesis	Fatty Acid and Lipid Biosynthesis	Phospholipid Biosynthesis	CDP-diacylglycerol Biosynthesis	CDP-diacylglycerol biosynthesis II	CDP-diacylglycerol biosynthesis II	CDP-diacylglycerol biosynthesis II	CDP-diacylglycerol biosynthesis II	PWY0-1319	CDP-diacylglycerol biosynthesis II
Biosynthesis	Fatty Acid and Lipid Biosynthesis	Phospholipid Biosynthesis	CDP-diacylglycerol Biosynthesis	CDP-diacylglycerol biosynthesis III	CDP-diacylglycerol biosynthesis III	CDP-diacylglycerol biosynthesis III	CDP-diacylglycerol biosynthesis III	PWY-5981	CDP-diacylglycerol biosynthesis III
Biosynthesis	Fatty Acid and Lipid Biosynthesis	Phospholipid Biosynthesis	Phosphatidylcholine Biosynthesis	phosphatidylcholine biosynthesis I	phosphatidylcholine biosynthesis I	phosphatidylcholine biosynthesis I	phosphatidylcholine biosynthesis I	PWY3O-450	phosphatidylcholine biosynthesis I
Biosynthesis	Fatty Acid and Lipid Biosynthesis	Phospholipid Biosynthesis	Phosphatidylcholine Biosynthesis	phosphatidylcholine biosynthesis II	phosphatidylcholine biosynthesis II	phosphatidylcholine biosynthesis II	phosphatidylcholine biosynthesis II	PWY4FS-2	phosphatidylcholine biosynthesis II
Biosynthesis	Fatty Acid and Lipid Biosynthesis	Phospholipid Biosynthesis	Phosphatidylcholine Biosynthesis	phosphatidylcholine biosynthesis III	phosphatidylcholine biosynthesis III	phosphatidylcholine biosynthesis III	phosphatidylcholine biosynthesis III	PWY4FS-3	phosphatidylcholine biosynthesis III
Biosynthesis	Fatty Acid and Lipid Biosynthesis	Phospholipid Biosynthesis	Phosphatidylcholine Biosynthesis	phosphatidylcholine biosynthesis IV	phosphatidylcholine biosynthesis IV	phosphatidylcholine biosynthesis IV	phosphatidylcholine biosynthesis IV	PWY4FS-4	phosphatidylcholine biosynthesis IV
Biosynthesis	Fatty Acid and Lipid Biosynthesis	Phospholipid Biosynthesis	Phosphatidylcholine Biosynthesis	phosphatidylcholine biosynthesis V	phosphatidylcholine biosynthesis V	phosphatidylcholine biosynthesis V	phosphatidylcholine biosynthesis V	PWY-6825	phosphatidylcholine biosynthesis V
Biosynthesis	Fatty Acid and Lipid Biosynthesis	Phospholipid Biosynthesis	Phosphatidylcholine Biosynthesis	phosphatidylcholine biosynthesis VI	phosphatidylcholine biosynthesis VI	phosphatidylcholine biosynthesis VI	phosphatidylcholine biosynthesis VI	PWY-6826	phosphatidylcholine biosynthesis VI
Biosynthesis	Fatty Acid and Lipid Biosynthesis	Phospholipid Biosynthesis	Phosphatidylcholine Biosynthesis	phosphatidylcholine biosynthesis VII	phosphatidylcholine biosynthesis VII	phosphatidylcholine biosynthesis VII	phosphatidylcholine biosynthesis VII	PWY-7470	phosphatidylcholine biosynthesis VII
Biosynthesis	Fatty Acid and Lipid Biosynthesis	Phospholipid Biosynthesis	Phosphatidylcholine Biosynthesis	phospholipid remodeling (phosphatidylcholine, yeast)	phospholipid remodeling (phosphatidylcholine, yeast)	phospholipid remodeling (phosphatidylcholine, yeast)	phospholipid remodeling (phosphatidylcholine, yeast)	PWY-7416	phospholipid remodeling (phosphatidylcholine, yeast)
Biosynthesis	Fatty Acid and Lipid Biosynthesis	Phospholipid Biosynthesis	Phosphatidylethanolamine Biosynthesis	cardiolipin and phosphatidylethanolamine biosynthesis (Xanthomonas)	cardiolipin and phosphatidylethanolamine biosynthesis (Xanthomonas)	cardiolipin and phosphatidylethanolamine biosynthesis (Xanthomonas)	cardiolipin and phosphatidylethanolamine biosynthesis (Xanthomonas)	PWY-7509	cardiolipin and phosphatidylethanolamine biosynthesis (Xanthomonas)
Biosynthesis	Fatty Acid and Lipid Biosynthesis	Phospholipid Biosynthesis	Phosphatidylethanolamine Biosynthesis	phosphatidylethanolamine biosynthesis II	phosphatidylethanolamine biosynthesis II	phosphatidylethanolamine biosynthesis II	phosphatidylethanolamine biosynthesis II	PWY4FS-6	phosphatidylethanolamine biosynthesis II
Biosynthesis	Fatty Acid and Lipid Biosynthesis	Phospholipid Biosynthesis	Phosphatidylethanolamine Biosynthesis	phosphatidylethanolamine biosynthesis III	phosphatidylethanolamine biosynthesis III	phosphatidylethanolamine biosynthesis III	phosphatidylethanolamine biosynthesis III	PWY-6273	phosphatidylethanolamine biosynthesis III
Biosynthesis	Fatty Acid and Lipid Biosynthesis	Phospholipid Biosynthesis	Phosphatidylethanolamine Biosynthesis	phosphatidylserine and phosphatidylethanolamine biosynthesis I	phosphatidylserine and phosphatidylethanolamine biosynthesis I	phosphatidylserine and phosphatidylethanolamine biosynthesis I	phosphatidylserine and phosphatidylethanolamine biosynthesis I	PWY-5669	phosphatidylserine and phosphatidylethanolamine biosynthesis I
Biosynthesis	Fatty Acid and Lipid Biosynthesis	Phospholipid Biosynthesis	Phosphatidylethanolamine Biosynthesis	phospholipid remodeling (phosphatidylethanolamine, yeast)	phospholipid remodeling (phosphatidylethanolamine, yeast)	phospholipid remodeling (phosphatidylethanolamine, yeast)	phospholipid remodeling (phosphatidylethanolamine, yeast)	PWY-7409	phospholipid remodeling (phosphatidylethanolamine, yeast)
Biosynthesis	Fatty Acid and Lipid Biosynthesis	Phospholipid Biosynthesis	Phosphatidylglycerol Biosynthesis	phosphatidylglycerol biosynthesis I (plastidic)	phosphatidylglycerol biosynthesis I (plastidic)	phosphatidylglycerol biosynthesis I (plastidic)	phosphatidylglycerol biosynthesis I (plastidic)	PWY4FS-7	phosphatidylglycerol biosynthesis I (plastidic)
Biosynthesis	Fatty Acid and Lipid Biosynthesis	Phospholipid Biosynthesis	Phosphatidylglycerol Biosynthesis	phosphatidylglycerol biosynthesis II (non-plastidic)	phosphatidylglycerol biosynthesis II (non-plastidic)	phosphatidylglycerol biosynthesis II (non-plastidic)	phosphatidylglycerol biosynthesis II (non-plastidic)	PWY4FS-8	phosphatidylglycerol biosynthesis II (non-plastidic)
Biosynthesis	Fatty Acid and Lipid Biosynthesis	Phospholipid Biosynthesis	Phosphatidylinositol Biosynthesis	phosphatidylinositol biosynthesis I (bacteria)	phosphatidylinositol biosynthesis I (bacteria)	phosphatidylinositol biosynthesis I (bacteria)	phosphatidylinositol biosynthesis I (bacteria)	PWY-6580	phosphatidylinositol biosynthesis I (bacteria)
Biosynthesis	Fatty Acid and Lipid Biosynthesis	Phospholipid Biosynthesis	Phosphatidylinositol Biosynthesis	phosphatidylinositol biosynthesis II (eukaryotes)	phosphatidylinositol biosynthesis II (eukaryotes)	phosphatidylinositol biosynthesis II (eukaryotes)	phosphatidylinositol biosynthesis II (eukaryotes)	PWY-7625	phosphatidylinositol biosynthesis II (eukaryotes)
Biosynthesis	Fatty Acid and Lipid Biosynthesis	Phospholipid Biosynthesis	Phosphatidylserine Biosynthesis	phosphatidylserine and phosphatidylethanolamine biosynthesis I	phosphatidylserine and phosphatidylethanolamine biosynthesis I	phosphatidylserine and phosphatidylethanolamine biosynthesis I	phosphatidylserine and phosphatidylethanolamine biosynthesis I	PWY-5669	phosphatidylserine and phosphatidylethanolamine biosynthesis I
Biosynthesis	Fatty Acid and Lipid Biosynthesis	Phospholipid Biosynthesis	Phosphatidylserine Biosynthesis	phosphatidylserine biosynthesis I	phosphatidylserine biosynthesis I	phosphatidylserine biosynthesis I	phosphatidylserine biosynthesis I	PWY-7501	phosphatidylserine biosynthesis I
Biosynthesis	Fatty Acid and Lipid Biosynthesis	Phospholipid Biosynthesis	Phosphatidylserine Biosynthesis	phosphatidylserine biosynthesis II	phosphatidylserine biosynthesis II	phosphatidylserine biosynthesis II	phosphatidylserine biosynthesis II	PWY-7506	phosphatidylserine biosynthesis II
Biosynthesis	Fatty Acid and Lipid Biosynthesis	Phospholipid Biosynthesis	3-phosphoinositide biosynthesis	3-phosphoinositide biosynthesis	3-phosphoinositide biosynthesis	3-phosphoinositide biosynthesis	3-phosphoinositide biosynthesis	PWY-6352	3-phosphoinositide biosynthesis
Biosynthesis	Fatty Acid and Lipid Biosynthesis	Phospholipid Biosynthesis	archaetidylinositol biosynthesis	archaetidylinositol biosynthesis	archaetidylinositol biosynthesis	archaetidylinositol biosynthesis	archaetidylinositol biosynthesis	PWY-6350	archaetidylinositol biosynthesis
Biosynthesis	Fatty Acid and Lipid Biosynthesis	Phospholipid Biosynthesis	archaetidylserine and archaetidylethanolamine biosynthesis	archaetidylserine and archaetidylethanolamine biosynthesis	archaetidylserine and archaetidylethanolamine biosynthesis	archaetidylserine and archaetidylethanolamine biosynthesis	archaetidylserine and archaetidylethanolamine biosynthesis	PWY-6141	archaetidylserine and archaetidylethanolamine biosynthesis
Biosynthesis	Fatty Acid and Lipid Biosynthesis	Phospholipid Biosynthesis	CDP-archaeol biosynthesis	CDP-archaeol biosynthesis	CDP-archaeol biosynthesis	CDP-archaeol biosynthesis	CDP-archaeol biosynthesis	PWY-6349	CDP-archaeol biosynthesis
Biosynthesis	Fatty Acid and Lipid Biosynthesis	Phospholipid Biosynthesis	D-myo-inositol-5-phosphate metabolism	D-myo-inositol-5-phosphate metabolism	D-myo-inositol-5-phosphate metabolism	D-myo-inositol-5-phosphate metabolism	D-myo-inositol-5-phosphate metabolism	PWY-6367	D-myo-inositol-5-phosphate metabolism
Biosynthesis	Fatty Acid and Lipid Biosynthesis	Phospholipid Biosynthesis	phosphatidate biosynthesis (yeast)	phosphatidate biosynthesis (yeast)	phosphatidate biosynthesis (yeast)	phosphatidate biosynthesis (yeast)	phosphatidate biosynthesis (yeast)	PWY-7411	phosphatidate biosynthesis (yeast)
Biosynthesis	Fatty Acid and Lipid Biosynthesis	Phospholipid Biosynthesis	phosphatidate metabolism, as a signaling molecule	phosphatidate metabolism, as a signaling molecule	phosphatidate metabolism, as a signaling molecule	phosphatidate metabolism, as a signaling molecule	phosphatidate metabolism, as a signaling molecule	PWY-7039	phosphatidate metabolism, as a signaling molecule
Biosynthesis	Fatty Acid and Lipid Biosynthesis	Phospholipid Biosynthesis	phospholipid desaturation	phospholipid desaturation	phospholipid desaturation	phospholipid desaturation	phospholipid desaturation	PWY-762	phospholipid desaturation
Biosynthesis	Fatty Acid and Lipid Biosynthesis	Phospholipid Biosynthesis	phospholipid remodeling (phosphatidate, yeast)	phospholipid remodeling (phosphatidate, yeast)	phospholipid remodeling (phosphatidate, yeast)	phospholipid remodeling (phosphatidate, yeast)	phospholipid remodeling (phosphatidate, yeast)	PWY-7417	phospholipid remodeling (phosphatidate, yeast)
Biosynthesis	Fatty Acid and Lipid Biosynthesis	Phospholipid Biosynthesis	plasmalogen biosynthesis	plasmalogen biosynthesis	plasmalogen biosynthesis	plasmalogen biosynthesis	plasmalogen biosynthesis	PWY-7782	plasmalogen biosynthesis
Biosynthesis	Fatty Acid and Lipid Biosynthesis	Phospholipid Biosynthesis	superpathway of inositol phosphate compounds	superpathway of inositol phosphate compounds	superpathway of inositol phosphate compounds	superpathway of inositol phosphate compounds	superpathway of inositol phosphate compounds	PWY-6371	superpathway of inositol phosphate compounds
Biosynthesis	Fatty Acid and Lipid Biosynthesis	Phospholipid Biosynthesis	superpathway of phospholipid biosynthesis I (bacteria)	superpathway of phospholipid biosynthesis I (bacteria)	superpathway of phospholipid biosynthesis I (bacteria)	superpathway of phospholipid biosynthesis I (bacteria)	superpathway of phospholipid biosynthesis I (bacteria)	PHOSLIPSYN-PWY	superpathway of phospholipid biosynthesis I (bacteria)
Biosynthesis	Fatty Acid and Lipid Biosynthesis	Phospholipid Biosynthesis	superpathway of phospholipid biosynthesis II (plants)	superpathway of phospholipid biosynthesis II (plants)	superpathway of phospholipid biosynthesis II (plants)	superpathway of phospholipid biosynthesis II (plants)	superpathway of phospholipid biosynthesis II (plants)	PHOSLIPSYN2-PWY	superpathway of phospholipid biosynthesis II (plants)
Biosynthesis	Fatty Acid and Lipid Biosynthesis	Sphingolipid Biosynthesis	acylceramide biosynthesis	acylceramide biosynthesis	acylceramide biosynthesis	acylceramide biosynthesis	acylceramide biosynthesis	PWY-8042	acylceramide biosynthesis
Biosynthesis	Fatty Acid and Lipid Biosynthesis	Sphingolipid Biosynthesis	ceramide de novo biosynthesis	ceramide de novo biosynthesis	ceramide de novo biosynthesis	ceramide de novo biosynthesis	ceramide de novo biosynthesis	PWY3DJ-12	ceramide de novo biosynthesis
Biosynthesis	Fatty Acid and Lipid Biosynthesis	Sphingolipid Biosynthesis	ceramide phosphoethanolamine biosynthesis	ceramide phosphoethanolamine biosynthesis	ceramide phosphoethanolamine biosynthesis	ceramide phosphoethanolamine biosynthesis	ceramide phosphoethanolamine biosynthesis	PWY-7404	ceramide phosphoethanolamine biosynthesis
Biosynthesis	Fatty Acid and Lipid Biosynthesis	Sphingolipid Biosynthesis	gala-series glycosphingolipids biosynthesis	gala-series glycosphingolipids biosynthesis	gala-series glycosphingolipids biosynthesis	gala-series glycosphingolipids biosynthesis	gala-series glycosphingolipids biosynthesis	PWY-7840	gala-series glycosphingolipids biosynthesis
Biosynthesis	Fatty Acid and Lipid Biosynthesis	Sphingolipid Biosynthesis	ganglio-series glycosphingolipids biosynthesis	ganglio-series glycosphingolipids biosynthesis	ganglio-series glycosphingolipids biosynthesis	ganglio-series glycosphingolipids biosynthesis	ganglio-series glycosphingolipids biosynthesis	PWY-7836	ganglio-series glycosphingolipids biosynthesis
Biosynthesis	Fatty Acid and Lipid Biosynthesis	Sphingolipid Biosynthesis	globo-series glycosphingolipids biosynthesis	globo-series glycosphingolipids biosynthesis	globo-series glycosphingolipids biosynthesis	globo-series glycosphingolipids biosynthesis	globo-series glycosphingolipids biosynthesis	PWY-7838	globo-series glycosphingolipids biosynthesis
Biosynthesis	Fatty Acid and Lipid Biosynthesis	Sphingolipid Biosynthesis	lacto-series glycosphingolipids biosynthesis	lacto-series glycosphingolipids biosynthesis	lacto-series glycosphingolipids biosynthesis	lacto-series glycosphingolipids biosynthesis	lacto-series glycosphingolipids biosynthesis	PWY-7839	lacto-series glycosphingolipids biosynthesis
Biosynthesis	Fatty Acid and Lipid Biosynthesis	Sphingolipid Biosynthesis	neolacto-series glycosphingolipids biosynthesis	neolacto-series glycosphingolipids biosynthesis	neolacto-series glycosphingolipids biosynthesis	neolacto-series glycosphingolipids biosynthesis	neolacto-series glycosphingolipids biosynthesis	PWY-7841	neolacto-series glycosphingolipids biosynthesis
Biosynthesis	Fatty Acid and Lipid Biosynthesis	Sphingolipid Biosynthesis	sphingolipid biosynthesis (mammals)	sphingolipid biosynthesis (mammals)	sphingolipid biosynthesis (mammals)	sphingolipid biosynthesis (mammals)	sphingolipid biosynthesis (mammals)	PWY-7277	sphingolipid biosynthesis (mammals)
Biosynthesis	Fatty Acid and Lipid Biosynthesis	Sphingolipid Biosynthesis	sphingolipid biosynthesis (plants)	sphingolipid biosynthesis (plants)	sphingolipid biosynthesis (plants)	sphingolipid biosynthesis (plants)	sphingolipid biosynthesis (plants)	PWY-5129	sphingolipid biosynthesis (plants)
Biosynthesis	Fatty Acid and Lipid Biosynthesis	Sphingolipid Biosynthesis	sphingolipid biosynthesis (yeast)	sphingolipid biosynthesis (yeast)	sphingolipid biosynthesis (yeast)	sphingolipid biosynthesis (yeast)	sphingolipid biosynthesis (yeast)	SPHINGOLIPID-SYN-PWY	sphingolipid biosynthesis (yeast)
Biosynthesis	Fatty Acid and Lipid Biosynthesis	Sphingolipid Biosynthesis	superpathway of glycosphingolipids biosynthesis	superpathway of glycosphingolipids biosynthesis	superpathway of glycosphingolipids biosynthesis	superpathway of glycosphingolipids biosynthesis	superpathway of glycosphingolipids biosynthesis	PWY-7835	superpathway of glycosphingolipids biosynthesis
Biosynthesis	Fatty Acid and Lipid Biosynthesis	Sterol Biosynthesis	Ergosterol Biosynthesis	ergosterol biosynthesis I	ergosterol biosynthesis I	ergosterol biosynthesis I	ergosterol biosynthesis I	PWY-6075	ergosterol biosynthesis I
Biosynthesis	Fatty Acid and Lipid Biosynthesis	Sterol Biosynthesis	Ergosterol Biosynthesis	ergosterol biosynthesis II	ergosterol biosynthesis II	ergosterol biosynthesis II	ergosterol biosynthesis II	PWY-7154	ergosterol biosynthesis II
Biosynthesis	Fatty Acid and Lipid Biosynthesis	Sterol Biosynthesis	Ergosterol Biosynthesis	superpathway of ergosterol biosynthesis I	superpathway of ergosterol biosynthesis I	superpathway of ergosterol biosynthesis I	superpathway of ergosterol biosynthesis I	ERGOSTEROL-SYN-PWY	superpathway of ergosterol biosynthesis I
Biosynthesis	Fatty Acid and Lipid Biosynthesis	Sterol Biosynthesis	Ergosterol Biosynthesis	superpathway of ergosterol biosynthesis II	superpathway of ergosterol biosynthesis II	superpathway of ergosterol biosynthesis II	superpathway of ergosterol biosynthesis II	PWY-7156	superpathway of ergosterol biosynthesis II
Biosynthesis	Fatty Acid and Lipid Biosynthesis	Sterol Biosynthesis	Iso-bile Acid Biosynthesis	iso-bile acids biosynthesis I	iso-bile acids biosynthesis I	iso-bile acids biosynthesis I	iso-bile acids biosynthesis I	PWY-7755	iso-bile acids biosynthesis I
Biosynthesis	Fatty Acid and Lipid Biosynthesis	Sterol Biosynthesis	Iso-bile Acid Biosynthesis	iso-bile acids biosynthesis II	iso-bile acids biosynthesis II	iso-bile acids biosynthesis II	iso-bile acids biosynthesis II	PWY-7756	iso-bile acids biosynthesis II
Biosynthesis	Fatty Acid and Lipid Biosynthesis	Sterol Biosynthesis	7-dehydroporiferasterol biosynthesis	7-dehydroporiferasterol biosynthesis	7-dehydroporiferasterol biosynthesis	7-dehydroporiferasterol biosynthesis	7-dehydroporiferasterol biosynthesis	PWY-7155	7-dehydroporiferasterol biosynthesis
Biosynthesis	Fatty Acid and Lipid Biosynthesis	Sterol Biosynthesis	allopregnanolone biosynthesis	allopregnanolone biosynthesis	allopregnanolone biosynthesis	allopregnanolone biosynthesis	allopregnanolone biosynthesis	PWY-7455	allopregnanolone biosynthesis
Biosynthesis	Fatty Acid and Lipid Biosynthesis	Sterol Biosynthesis	bile acid biosynthesis, neutral pathway	bile acid biosynthesis, neutral pathway	bile acid biosynthesis, neutral pathway	bile acid biosynthesis, neutral pathway	bile acid biosynthesis, neutral pathway	PWY-6061	bile acid biosynthesis, neutral pathway
Biosynthesis	Fatty Acid and Lipid Biosynthesis	Sterol Biosynthesis	cardenolide glucosides biosynthesis	cardenolide glucosides biosynthesis	cardenolide glucosides biosynthesis	cardenolide glucosides biosynthesis	cardenolide glucosides biosynthesis	PWY-6036	cardenolide glucosides biosynthesis
Biosynthesis	Fatty Acid and Lipid Biosynthesis	Sterol Biosynthesis	cholesterol biosynthesis (plants)	cholesterol biosynthesis (plants)	cholesterol biosynthesis (plants)	cholesterol biosynthesis (plants)	cholesterol biosynthesis (plants)	PWY18C3-1	cholesterol biosynthesis (plants)
Biosynthesis	Fatty Acid and Lipid Biosynthesis	Sterol Biosynthesis	cholesterol biosynthesis I	cholesterol biosynthesis I	cholesterol biosynthesis I	cholesterol biosynthesis I	cholesterol biosynthesis I	PWY66-341	cholesterol biosynthesis I
Biosynthesis	Fatty Acid and Lipid Biosynthesis	Sterol Biosynthesis	cholesterol biosynthesis II (via 24,25-dihydrolanosterol)	cholesterol biosynthesis II (via 24,25-dihydrolanosterol)	cholesterol biosynthesis II (via 24,25-dihydrolanosterol)	cholesterol biosynthesis II (via 24,25-dihydrolanosterol)	cholesterol biosynthesis II (via 24,25-dihydrolanosterol)	PWY66-3	cholesterol biosynthesis II (via 24,25-dihydrolanosterol)
Biosynthesis	Fatty Acid and Lipid Biosynthesis	Sterol Biosynthesis	cholesterol biosynthesis III (via desmosterol)	cholesterol biosynthesis III (via desmosterol)	cholesterol biosynthesis III (via desmosterol)	cholesterol biosynthesis III (via desmosterol)	cholesterol biosynthesis III (via desmosterol)	PWY66-4	cholesterol biosynthesis III (via desmosterol)
Biosynthesis	Fatty Acid and Lipid Biosynthesis	Sterol Biosynthesis	cycloartenol biosynthesis	cycloartenol biosynthesis	cycloartenol biosynthesis	cycloartenol biosynthesis	cycloartenol biosynthesis	PWY-8028	cycloartenol biosynthesis
Biosynthesis	Fatty Acid and Lipid Biosynthesis	Sterol Biosynthesis	digitoxigenin biosynthesis	digitoxigenin biosynthesis	digitoxigenin biosynthesis	digitoxigenin biosynthesis	digitoxigenin biosynthesis	PWY-6032	digitoxigenin biosynthesis
Biosynthesis	Fatty Acid and Lipid Biosynthesis	Sterol Biosynthesis	lanosterol biosynthesis	lanosterol biosynthesis	lanosterol biosynthesis	lanosterol biosynthesis	lanosterol biosynthesis	PWY-6132	lanosterol biosynthesis
Biosynthesis	Fatty Acid and Lipid Biosynthesis	Sterol Biosynthesis	parkeol biosynthesis	parkeol biosynthesis	parkeol biosynthesis	parkeol biosynthesis	parkeol biosynthesis	PWY-8027	parkeol biosynthesis
Biosynthesis	Fatty Acid and Lipid Biosynthesis	Sterol Biosynthesis	phytosterol biosynthesis (plants)	phytosterol biosynthesis (plants)	phytosterol biosynthesis (plants)	phytosterol biosynthesis (plants)	phytosterol biosynthesis (plants)	PWY-2541	phytosterol biosynthesis (plants)
Biosynthesis	Fatty Acid and Lipid Biosynthesis	Sterol Biosynthesis	sterol biosynthesis (methylotrophs)	sterol biosynthesis (methylotrophs)	sterol biosynthesis (methylotrophs)	sterol biosynthesis (methylotrophs)	sterol biosynthesis (methylotrophs)	PWY-8026	sterol biosynthesis (methylotrophs)
Biosynthesis	Fatty Acid and Lipid Biosynthesis	Sterol Biosynthesis	sterol:steryl ester interconversion (yeast)	sterol:steryl ester interconversion (yeast)	sterol:steryl ester interconversion (yeast)	sterol:steryl ester interconversion (yeast)	sterol:steryl ester interconversion (yeast)	PWY-7424	sterol:steryl ester interconversion (yeast)
Biosynthesis	Fatty Acid and Lipid Biosynthesis	Sterol Biosynthesis	superpathway of cholesterol biosynthesis	superpathway of cholesterol biosynthesis	superpathway of cholesterol biosynthesis	superpathway of cholesterol biosynthesis	superpathway of cholesterol biosynthesis	PWY66-5	superpathway of cholesterol biosynthesis
Biosynthesis	Fatty Acid and Lipid Biosynthesis	Sterol Biosynthesis	ursodeoxycholate biosynthesis (bacteria)	ursodeoxycholate biosynthesis (bacteria)	ursodeoxycholate biosynthesis (bacteria)	ursodeoxycholate biosynthesis (bacteria)	ursodeoxycholate biosynthesis (bacteria)	PWY-7588	ursodeoxycholate biosynthesis (bacteria)
Biosynthesis	Fatty Acid and Lipid Biosynthesis	Sterol Biosynthesis	zymosterol biosynthesis	zymosterol biosynthesis	zymosterol biosynthesis	zymosterol biosynthesis	zymosterol biosynthesis	PWY-6074	zymosterol biosynthesis
Biosynthesis	Fatty Acid and Lipid Biosynthesis	β-D-mannosyl phosphomycoketide biosynthesis	β-D-mannosyl phosphomycoketide biosynthesis	β-D-mannosyl phosphomycoketide biosynthesis	β-D-mannosyl phosphomycoketide biosynthesis	β-D-mannosyl phosphomycoketide biosynthesis	β-D-mannosyl phosphomycoketide biosynthesis	PWY-7740	β-D-mannosyl phosphomycoketide biosynthesis
Biosynthesis	Fatty Acid and Lipid Biosynthesis	(Kdo)2-lipid A biosynthesis I (E. coli)	(Kdo)2-lipid A biosynthesis I (E. coli)	(Kdo)2-lipid A biosynthesis I (E. coli)	(Kdo)2-lipid A biosynthesis I (E. coli)	(Kdo)2-lipid A biosynthesis I (E. coli)	(Kdo)2-lipid A biosynthesis I (E. coli)	KDO-LIPASYN-PWY	(Kdo)2-lipid A biosynthesis I (E. coli)
Biosynthesis	Fatty Acid and Lipid Biosynthesis	(Kdo)2-lipid A biosynthesis II (P. putida)	(Kdo)2-lipid A biosynthesis II (P. putida)	(Kdo)2-lipid A biosynthesis II (P. putida)	(Kdo)2-lipid A biosynthesis II (P. putida)	(Kdo)2-lipid A biosynthesis II (P. putida)	(Kdo)2-lipid A biosynthesis II (P. putida)	PWY-8075	(Kdo)2-lipid A biosynthesis II (P. putida)
Biosynthesis	Fatty Acid and Lipid Biosynthesis	acyl-CoA hydrolysis	acyl-CoA hydrolysis	acyl-CoA hydrolysis	acyl-CoA hydrolysis	acyl-CoA hydrolysis	acyl-CoA hydrolysis	PWY-5148	acyl-CoA hydrolysis
Biosynthesis	Fatty Acid and Lipid Biosynthesis	acyl-[acyl-carrier protein] thioesterase pathway	acyl-[acyl-carrier protein] thioesterase pathway	acyl-[acyl-carrier protein] thioesterase pathway	acyl-[acyl-carrier protein] thioesterase pathway	acyl-[acyl-carrier protein] thioesterase pathway	acyl-[acyl-carrier protein] thioesterase pathway	PWY-5142	acyl-[acyl-carrier protein] thioesterase pathway
Biosynthesis	Fatty Acid and Lipid Biosynthesis	biotin-carboxyl carrier protein assembly	biotin-carboxyl carrier protein assembly	biotin-carboxyl carrier protein assembly	biotin-carboxyl carrier protein assembly	biotin-carboxyl carrier protein assembly	biotin-carboxyl carrier protein assembly	PWY0-1264	biotin-carboxyl carrier protein assembly
Biosynthesis	Fatty Acid and Lipid Biosynthesis	cuticular wax biosynthesis	cuticular wax biosynthesis	cuticular wax biosynthesis	cuticular wax biosynthesis	cuticular wax biosynthesis	cuticular wax biosynthesis	PWY-282	cuticular wax biosynthesis
Biosynthesis	Fatty Acid and Lipid Biosynthesis	cutin biosynthesis	cutin biosynthesis	cutin biosynthesis	cutin biosynthesis	cutin biosynthesis	cutin biosynthesis	PWY-321	cutin biosynthesis
Biosynthesis	Fatty Acid and Lipid Biosynthesis	diacylglycerol and triacylglycerol biosynthesis	diacylglycerol and triacylglycerol biosynthesis	diacylglycerol and triacylglycerol biosynthesis	diacylglycerol and triacylglycerol biosynthesis	diacylglycerol and triacylglycerol biosynthesis	diacylglycerol and triacylglycerol biosynthesis	TRIGLSYN-PWY	diacylglycerol and triacylglycerol biosynthesis
Biosynthesis	Fatty Acid and Lipid Biosynthesis	diacylglycerol biosynthesis (PUFA enrichment in oilseed)	diacylglycerol biosynthesis (PUFA enrichment in oilseed)	diacylglycerol biosynthesis (PUFA enrichment in oilseed)	diacylglycerol biosynthesis (PUFA enrichment in oilseed)	diacylglycerol biosynthesis (PUFA enrichment in oilseed)	diacylglycerol biosynthesis (PUFA enrichment in oilseed)	PWY-6804	diacylglycerol biosynthesis (PUFA enrichment in oilseed)
Biosynthesis	Fatty Acid and Lipid Biosynthesis	diacylglyceryl-N,N,N-trimethylhomoserine biosynthesis	diacylglyceryl-N,N,N-trimethylhomoserine biosynthesis	diacylglyceryl-N,N,N-trimethylhomoserine biosynthesis	diacylglyceryl-N,N,N-trimethylhomoserine biosynthesis	diacylglyceryl-N,N,N-trimethylhomoserine biosynthesis	diacylglyceryl-N,N,N-trimethylhomoserine biosynthesis	PWY-6795	diacylglyceryl-N,N,N-trimethylhomoserine biosynthesis
Biosynthesis	Fatty Acid and Lipid Biosynthesis	dimycocerosyl phthiocerol biosynthesis	dimycocerosyl phthiocerol biosynthesis	dimycocerosyl phthiocerol biosynthesis	dimycocerosyl phthiocerol biosynthesis	dimycocerosyl phthiocerol biosynthesis	dimycocerosyl phthiocerol biosynthesis	PWY-7744	dimycocerosyl phthiocerol biosynthesis
Biosynthesis	Fatty Acid and Lipid Biosynthesis	dimycocerosyl triglycosyl phenolphthiocerol biosynthesis	dimycocerosyl triglycosyl phenolphthiocerol biosynthesis	dimycocerosyl triglycosyl phenolphthiocerol biosynthesis	dimycocerosyl triglycosyl phenolphthiocerol biosynthesis	dimycocerosyl triglycosyl phenolphthiocerol biosynthesis	dimycocerosyl triglycosyl phenolphthiocerol biosynthesis	PWY-7743	dimycocerosyl triglycosyl phenolphthiocerol biosynthesis
Biosynthesis	Fatty Acid and Lipid Biosynthesis	dolichol and dolichyl phosphate biosynthesis	dolichol and dolichyl phosphate biosynthesis	dolichol and dolichyl phosphate biosynthesis	dolichol and dolichyl phosphate biosynthesis	dolichol and dolichyl phosphate biosynthesis	dolichol and dolichyl phosphate biosynthesis	PWY-6129	dolichol and dolichyl phosphate biosynthesis
Biosynthesis	Fatty Acid and Lipid Biosynthesis	epoxysqualene biosynthesis	epoxysqualene biosynthesis	epoxysqualene biosynthesis	epoxysqualene biosynthesis	epoxysqualene biosynthesis	epoxysqualene biosynthesis	PWY-5670	epoxysqualene biosynthesis
Biosynthesis	Fatty Acid and Lipid Biosynthesis	glycine lipid biosynthesis	glycine lipid biosynthesis	glycine lipid biosynthesis	glycine lipid biosynthesis	glycine lipid biosynthesis	glycine lipid biosynthesis	PWY-8082	glycine lipid biosynthesis
Biosynthesis	Fatty Acid and Lipid Biosynthesis	lipid A-core biosynthesis (E. coli K-12)	lipid A-core biosynthesis (E. coli K-12)	lipid A-core biosynthesis (E. coli K-12)	lipid A-core biosynthesis (E. coli K-12)	lipid A-core biosynthesis (E. coli K-12)	lipid A-core biosynthesis (E. coli K-12)	LIPA-CORESYN-PWY	lipid A-core biosynthesis (E. coli K-12)
Biosynthesis	Fatty Acid and Lipid Biosynthesis	lipid IVA biosynthesis (P. putida)	lipid IVA biosynthesis (P. putida)	lipid IVA biosynthesis (P. putida)	lipid IVA biosynthesis (P. putida)	lipid IVA biosynthesis (P. putida)	lipid IVA biosynthesis (P. putida)	PWY-8073	lipid IVA biosynthesis (P. putida)
Biosynthesis	Fatty Acid and Lipid Biosynthesis	lipid IVA biosynthesis (E. coli)	lipid IVA biosynthesis (E. coli)	lipid IVA biosynthesis (E. coli)	lipid IVA biosynthesis (E. coli)	lipid IVA biosynthesis (E. coli)	lipid IVA biosynthesis (E. coli)	NAGLIPASYN-PWY	lipid IVA biosynthesis (E. coli)
Biosynthesis	Fatty Acid and Lipid Biosynthesis	long-chain fatty acid activation	long-chain fatty acid activation	long-chain fatty acid activation	long-chain fatty acid activation	long-chain fatty acid activation	long-chain fatty acid activation	PWY-5143	long-chain fatty acid activation
Biosynthesis	Fatty Acid and Lipid Biosynthesis	monoacylglycerol metabolism (yeast)	monoacylglycerol metabolism (yeast)	monoacylglycerol metabolism (yeast)	monoacylglycerol metabolism (yeast)	monoacylglycerol metabolism (yeast)	monoacylglycerol metabolism (yeast)	PWY-7420	monoacylglycerol metabolism (yeast)
Biosynthesis	Fatty Acid and Lipid Biosynthesis	mycobacterial sulfolipid biosynthesis	mycobacterial sulfolipid biosynthesis	mycobacterial sulfolipid biosynthesis	mycobacterial sulfolipid biosynthesis	mycobacterial sulfolipid biosynthesis	mycobacterial sulfolipid biosynthesis	PWY-7746	mycobacterial sulfolipid biosynthesis
Biosynthesis	Fatty Acid and Lipid Biosynthesis	ornithine lipid biosynthesis	ornithine lipid biosynthesis	ornithine lipid biosynthesis	ornithine lipid biosynthesis	ornithine lipid biosynthesis	ornithine lipid biosynthesis	PWY-6818	ornithine lipid biosynthesis
Biosynthesis	Fatty Acid and Lipid Biosynthesis	p-HBAD biosynthesis	p-HBAD biosynthesis	p-HBAD biosynthesis	p-HBAD biosynthesis	p-HBAD biosynthesis	p-HBAD biosynthesis	PWY-7745	p-HBAD biosynthesis
Biosynthesis	Fatty Acid and Lipid Biosynthesis	phenolphthiocerol biosynthesis	phenolphthiocerol biosynthesis	phenolphthiocerol biosynthesis	phenolphthiocerol biosynthesis	phenolphthiocerol biosynthesis	phenolphthiocerol biosynthesis	PWY-7742	phenolphthiocerol biosynthesis
Biosynthesis	Fatty Acid and Lipid Biosynthesis	phosphatidylcholine acyl editing	phosphatidylcholine acyl editing	phosphatidylcholine acyl editing	phosphatidylcholine acyl editing	phosphatidylcholine acyl editing	phosphatidylcholine acyl editing	PWY-6803	phosphatidylcholine acyl editing
Biosynthesis	Fatty Acid and Lipid Biosynthesis	phthiocerol biosynthesis	phthiocerol biosynthesis	phthiocerol biosynthesis	phthiocerol biosynthesis	phthiocerol biosynthesis	phthiocerol biosynthesis	PWY-7741	phthiocerol biosynthesis
Biosynthesis	Fatty Acid and Lipid Biosynthesis	sophorolipid biosynthesis	sophorolipid biosynthesis	sophorolipid biosynthesis	sophorolipid biosynthesis	sophorolipid biosynthesis	sophorolipid biosynthesis	SOPHOROSYLOXYDOCOSANOATE-SYN-PWY	sophorolipid biosynthesis
Biosynthesis	Fatty Acid and Lipid Biosynthesis	sphingomyelin metabolism	sphingomyelin metabolism	sphingomyelin metabolism	sphingomyelin metabolism	sphingomyelin metabolism	sphingomyelin metabolism	PWY3DJ-11281	sphingomyelin metabolism
Biosynthesis	Fatty Acid and Lipid Biosynthesis	stigma estolide biosynthesis	stigma estolide biosynthesis	stigma estolide biosynthesis	stigma estolide biosynthesis	stigma estolide biosynthesis	stigma estolide biosynthesis	PWY-6453	stigma estolide biosynthesis
Biosynthesis	Fatty Acid and Lipid Biosynthesis	sulfoquinovosyl diacylglycerol biosynthesis	sulfoquinovosyl diacylglycerol biosynthesis	sulfoquinovosyl diacylglycerol biosynthesis	sulfoquinovosyl diacylglycerol biosynthesis	sulfoquinovosyl diacylglycerol biosynthesis	sulfoquinovosyl diacylglycerol biosynthesis	PWYQT-4427	sulfoquinovosyl diacylglycerol biosynthesis
Biosynthesis	Fatty Acid and Lipid Biosynthesis	superpathway of (Kdo)2-lipid A biosynthesis	superpathway of (Kdo)2-lipid A biosynthesis	superpathway of (Kdo)2-lipid A biosynthesis	superpathway of (Kdo)2-lipid A biosynthesis	superpathway of (Kdo)2-lipid A biosynthesis	superpathway of (Kdo)2-lipid A biosynthesis	KDO-NAGLIPASYN-PWY	superpathway of (Kdo)2-lipid A biosynthesis
Biosynthesis	Fatty Acid and Lipid Biosynthesis	superpathway of choline biosynthesis	superpathway of choline biosynthesis	superpathway of choline biosynthesis	superpathway of choline biosynthesis	superpathway of choline biosynthesis	superpathway of choline biosynthesis	PWY-4762	superpathway of choline biosynthesis
Biosynthesis	Fatty Acid and Lipid Biosynthesis	superpathway of lipopolysaccharide biosynthesis	superpathway of lipopolysaccharide biosynthesis	superpathway of lipopolysaccharide biosynthesis	superpathway of lipopolysaccharide biosynthesis	superpathway of lipopolysaccharide biosynthesis	superpathway of lipopolysaccharide biosynthesis	LPSSYN-PWY	superpathway of lipopolysaccharide biosynthesis
Biosynthesis	Fatty Acid and Lipid Biosynthesis	wax esters biosynthesis I	wax esters biosynthesis I	wax esters biosynthesis I	wax esters biosynthesis I	wax esters biosynthesis I	wax esters biosynthesis I	PWY-5884	wax esters biosynthesis I
Biosynthesis	Fatty Acid and Lipid Biosynthesis	wax esters biosynthesis II	wax esters biosynthesis II	wax esters biosynthesis II	wax esters biosynthesis II	wax esters biosynthesis II	wax esters biosynthesis II	PWY-5885	wax esters biosynthesis II
Biosynthesis	Hormone Biosynthesis	γ-butyrolactone biosynthesis	A-factor γ-butyrolactone biosynthesis	A-factor γ-butyrolactone biosynthesis	A-factor γ-butyrolactone biosynthesis	A-factor γ-butyrolactone biosynthesis	A-factor γ-butyrolactone biosynthesis	PWY-7878	A-factor γ-butyrolactone biosynthesis
Biosynthesis	Hormone Biosynthesis	γ-butyrolactone biosynthesis	IM-2 type γ-butyrolactones biosynthesis	IM-2 type γ-butyrolactones biosynthesis	IM-2 type γ-butyrolactones biosynthesis	IM-2 type γ-butyrolactones biosynthesis	IM-2 type γ-butyrolactones biosynthesis	PWY-7882	IM-2 type γ-butyrolactones biosynthesis
Biosynthesis	Hormone Biosynthesis	γ-butyrolactone biosynthesis	virginiae butanolide type γ-butyrolactones biosynthesis	virginiae butanolide type γ-butyrolactones biosynthesis	virginiae butanolide type γ-butyrolactones biosynthesis	virginiae butanolide type γ-butyrolactones biosynthesis	virginiae butanolide type γ-butyrolactones biosynthesis	PWY-7881	virginiae butanolide type γ-butyrolactones biosynthesis
Biosynthesis	Hormone Biosynthesis	juvenile hormone III biosynthesis	juvenile hormone III biosynthesis I	juvenile hormone III biosynthesis I	juvenile hormone III biosynthesis I	juvenile hormone III biosynthesis I	juvenile hormone III biosynthesis I	PWY-6575	juvenile hormone III biosynthesis I
Biosynthesis	Hormone Biosynthesis	juvenile hormone III biosynthesis	juvenile hormone III biosynthesis II	juvenile hormone III biosynthesis II	juvenile hormone III biosynthesis II	juvenile hormone III biosynthesis II	juvenile hormone III biosynthesis II	PWY-6650	juvenile hormone III biosynthesis II
Biosynthesis	Hormone Biosynthesis	Plant Hormone Biosynthesis	Abscisic Acid Biosynthesis	abscisic acid biosynthesis	abscisic acid biosynthesis	abscisic acid biosynthesis	abscisic acid biosynthesis	PWY-695	abscisic acid biosynthesis
Biosynthesis	Hormone Biosynthesis	Plant Hormone Biosynthesis	Abscisic Acid Biosynthesis	abscisic acid biosynthesis shunt	abscisic acid biosynthesis shunt	abscisic acid biosynthesis shunt	abscisic acid biosynthesis shunt	PWY4FS-17	abscisic acid biosynthesis shunt
Biosynthesis	Hormone Biosynthesis	Plant Hormone Biosynthesis	Auxin Biosynthesis	indole-3-acetate biosynthesis I	indole-3-acetate biosynthesis I	indole-3-acetate biosynthesis I	indole-3-acetate biosynthesis I	PWYDQC-4	indole-3-acetate biosynthesis I
Biosynthesis	Hormone Biosynthesis	Plant Hormone Biosynthesis	Auxin Biosynthesis	indole-3-acetate biosynthesis II	indole-3-acetate biosynthesis II	indole-3-acetate biosynthesis II	indole-3-acetate biosynthesis II	PWY-581	indole-3-acetate biosynthesis II
Biosynthesis	Hormone Biosynthesis	Plant Hormone Biosynthesis	Auxin Biosynthesis	indole-3-acetate biosynthesis III (bacteria)	indole-3-acetate biosynthesis III (bacteria)	indole-3-acetate biosynthesis III (bacteria)	indole-3-acetate biosynthesis III (bacteria)	PWY-3161	indole-3-acetate biosynthesis III (bacteria)
Biosynthesis	Hormone Biosynthesis	Plant Hormone Biosynthesis	Auxin Biosynthesis	indole-3-acetate biosynthesis IV (bacteria)	indole-3-acetate biosynthesis IV (bacteria)	indole-3-acetate biosynthesis IV (bacteria)	indole-3-acetate biosynthesis IV (bacteria)	PWY-5025	indole-3-acetate biosynthesis IV (bacteria)
Biosynthesis	Hormone Biosynthesis	Plant Hormone Biosynthesis	Auxin Biosynthesis	indole-3-acetate biosynthesis V (bacteria and fungi)	indole-3-acetate biosynthesis V (bacteria and fungi)	indole-3-acetate biosynthesis V (bacteria and fungi)	indole-3-acetate biosynthesis V (bacteria and fungi)	PWY-5026	indole-3-acetate biosynthesis V (bacteria and fungi)
Biosynthesis	Hormone Biosynthesis	Plant Hormone Biosynthesis	Auxin Biosynthesis	indole-3-acetate biosynthesis VI (bacteria)	indole-3-acetate biosynthesis VI (bacteria)	indole-3-acetate biosynthesis VI (bacteria)	indole-3-acetate biosynthesis VI (bacteria)	TRPIAACAT-PWY	indole-3-acetate biosynthesis VI (bacteria)
Biosynthesis	Hormone Biosynthesis	Plant Hormone Biosynthesis	Auxin Biosynthesis	methyl indole-3-acetate interconversion	methyl indole-3-acetate interconversion	methyl indole-3-acetate interconversion	methyl indole-3-acetate interconversion	PWY-6303	methyl indole-3-acetate interconversion
Biosynthesis	Hormone Biosynthesis	Plant Hormone Biosynthesis	Brassinosteroid Biosynthesis	brassinosteroid biosynthesis I	brassinosteroid biosynthesis I	brassinosteroid biosynthesis I	brassinosteroid biosynthesis I	PWY-699	brassinosteroid biosynthesis I
Biosynthesis	Hormone Biosynthesis	Plant Hormone Biosynthesis	Brassinosteroid Biosynthesis	brassinosteroid biosynthesis II	brassinosteroid biosynthesis II	brassinosteroid biosynthesis II	brassinosteroid biosynthesis II	PWY-2582	brassinosteroid biosynthesis II
Biosynthesis	Hormone Biosynthesis	Plant Hormone Biosynthesis	Cytokinin Biosynthesis	cis-zeatin biosynthesis	cis-zeatin biosynthesis	cis-zeatin biosynthesis	cis-zeatin biosynthesis	PWY-2781	cis-zeatin biosynthesis
Biosynthesis	Hormone Biosynthesis	Plant Hormone Biosynthesis	Cytokinin Biosynthesis	trans-zeatin biosynthesis	trans-zeatin biosynthesis	trans-zeatin biosynthesis	trans-zeatin biosynthesis	PWY-2681	trans-zeatin biosynthesis
Biosynthesis	Hormone Biosynthesis	Plant Hormone Biosynthesis	Cytokinin Biosynthesis	cytokinin-O-glucosides biosynthesis	cytokinin-O-glucosides biosynthesis	cytokinin-O-glucosides biosynthesis	cytokinin-O-glucosides biosynthesis	PWY-2902	cytokinin-O-glucosides biosynthesis
Biosynthesis	Hormone Biosynthesis	Plant Hormone Biosynthesis	Cytokinin Biosynthesis	cytokinins 7-N-glucoside biosynthesis	cytokinins 7-N-glucoside biosynthesis	cytokinins 7-N-glucoside biosynthesis	cytokinins 7-N-glucoside biosynthesis	PWY-2881	cytokinins 7-N-glucoside biosynthesis
Biosynthesis	Hormone Biosynthesis	Plant Hormone Biosynthesis	Cytokinin Biosynthesis	cytokinins 9-N-glucoside biosynthesis	cytokinins 9-N-glucoside biosynthesis	cytokinins 9-N-glucoside biosynthesis	cytokinins 9-N-glucoside biosynthesis	PWY-2901	cytokinins 9-N-glucoside biosynthesis
Biosynthesis	Hormone Biosynthesis	Plant Hormone Biosynthesis	Cytokinin Biosynthesis	lupinate biosynthesis	lupinate biosynthesis	lupinate biosynthesis	lupinate biosynthesis	PWY-5967	lupinate biosynthesis
Biosynthesis	Hormone Biosynthesis	Plant Hormone Biosynthesis	Ethylene Biosynthesis	ethylene biosynthesis I (plants)	ethylene biosynthesis I (plants)	ethylene biosynthesis I (plants)	ethylene biosynthesis I (plants)	ETHYL-PWY	ethylene biosynthesis I (plants)
Biosynthesis	Hormone Biosynthesis	Plant Hormone Biosynthesis	Ethylene Biosynthesis	ethylene biosynthesis II (microbes)	ethylene biosynthesis II (microbes)	ethylene biosynthesis II (microbes)	ethylene biosynthesis II (microbes)	PWY-6853	ethylene biosynthesis II (microbes)
Biosynthesis	Hormone Biosynthesis	Plant Hormone Biosynthesis	Ethylene Biosynthesis	ethylene biosynthesis III (microbes)	ethylene biosynthesis III (microbes)	ethylene biosynthesis III (microbes)	ethylene biosynthesis III (microbes)	PWY-6854	ethylene biosynthesis III (microbes)
Biosynthesis	Hormone Biosynthesis	Plant Hormone Biosynthesis	Ethylene Biosynthesis	ethylene biosynthesis V (engineered)	ethylene biosynthesis V (engineered)	ethylene biosynthesis V (engineered)	ethylene biosynthesis V (engineered)	PWY-7124	ethylene biosynthesis V (engineered)
Biosynthesis	Hormone Biosynthesis	Plant Hormone Biosynthesis	Gibberellin and Gibberellin Precursor Biosynthesis	Gibberellin biosynthesis	gibberellin biosynthesis I (non C-3, non C-13 hydroxylation)	gibberellin biosynthesis I (non C-3, non C-13 hydroxylation)	gibberellin biosynthesis I (non C-3, non C-13 hydroxylation)	PWY-5070	gibberellin biosynthesis I (non C-3, non C-13 hydroxylation)
Biosynthesis	Hormone Biosynthesis	Plant Hormone Biosynthesis	Gibberellin and Gibberellin Precursor Biosynthesis	Gibberellin biosynthesis	gibberellin biosynthesis II (early C-3 hydroxylation)	gibberellin biosynthesis II (early C-3 hydroxylation)	gibberellin biosynthesis II (early C-3 hydroxylation)	PWY-5036	gibberellin biosynthesis II (early C-3 hydroxylation)
Biosynthesis	Hormone Biosynthesis	Plant Hormone Biosynthesis	Gibberellin and Gibberellin Precursor Biosynthesis	Gibberellin biosynthesis	gibberellin biosynthesis III (early C-13 hydroxylation)	gibberellin biosynthesis III (early C-13 hydroxylation)	gibberellin biosynthesis III (early C-13 hydroxylation)	PWY-5035	gibberellin biosynthesis III (early C-13 hydroxylation)
Biosynthesis	Hormone Biosynthesis	Plant Hormone Biosynthesis	Gibberellin and Gibberellin Precursor Biosynthesis	Gibberellin biosynthesis	gibberellin biosynthesis IV (Gibberella fujikuroi)	gibberellin biosynthesis IV (Gibberella fujikuroi)	gibberellin biosynthesis IV (Gibberella fujikuroi)	PWY-5047	gibberellin biosynthesis IV (Gibberella fujikuroi)
Biosynthesis	Hormone Biosynthesis	Plant Hormone Biosynthesis	Gibberellin and Gibberellin Precursor Biosynthesis	Gibberellin biosynthesis	gibberellin biosynthesis V	gibberellin biosynthesis V	gibberellin biosynthesis V	PWY-7232	gibberellin biosynthesis V
Biosynthesis	Hormone Biosynthesis	Plant Hormone Biosynthesis	Gibberellin and Gibberellin Precursor Biosynthesis	ent -kaurene biosynthesis II	ent -kaurene biosynthesis II	ent -kaurene biosynthesis II	ent -kaurene biosynthesis II	PWY-6653	ent -kaurene biosynthesis II
Biosynthesis	Hormone Biosynthesis	Plant Hormone Biosynthesis	Gibberellin and Gibberellin Precursor Biosynthesis	ent-kaurene biosynthesis I	ent-kaurene biosynthesis I	ent-kaurene biosynthesis I	ent-kaurene biosynthesis I	PWY-5032	ent-kaurene biosynthesis I
Biosynthesis	Hormone Biosynthesis	Plant Hormone Biosynthesis	Gibberellin and Gibberellin Precursor Biosynthesis	GA12 biosynthesis	GA12 biosynthesis	GA12 biosynthesis	GA12 biosynthesis	PWY-5034	GA12 biosynthesis
Biosynthesis	Hormone Biosynthesis	Plant Hormone Biosynthesis	Gibberellin and Gibberellin Precursor Biosynthesis	superpathway of gibberellin biosynthesis	superpathway of gibberellin biosynthesis	superpathway of gibberellin biosynthesis	superpathway of gibberellin biosynthesis	PWY-5052	superpathway of gibberellin biosynthesis
Biosynthesis	Hormone Biosynthesis	Plant Hormone Biosynthesis	Gibberellin and Gibberellin Precursor Biosynthesis	superpathway of gibberellin GA12 biosynthesis	superpathway of gibberellin GA12 biosynthesis	superpathway of gibberellin GA12 biosynthesis	superpathway of gibberellin GA12 biosynthesis	PWY-5053	superpathway of gibberellin GA12 biosynthesis
Biosynthesis	Hormone Biosynthesis	Plant Hormone Biosynthesis	Jasmonate Biosynthesis	jasmonic acid biosynthesis	jasmonic acid biosynthesis	jasmonic acid biosynthesis	jasmonic acid biosynthesis	PWY-735	jasmonic acid biosynthesis
Biosynthesis	Hormone Biosynthesis	Plant Hormone Biosynthesis	Jasmonate Biosynthesis	jasmonoyl-amino acid conjugates biosynthesis I	jasmonoyl-amino acid conjugates biosynthesis I	jasmonoyl-amino acid conjugates biosynthesis I	jasmonoyl-amino acid conjugates biosynthesis I	PWY-6220	jasmonoyl-amino acid conjugates biosynthesis I
Biosynthesis	Hormone Biosynthesis	Plant Hormone Biosynthesis	Jasmonate Biosynthesis	jasmonoyl-amino acid conjugates biosynthesis II	jasmonoyl-amino acid conjugates biosynthesis II	jasmonoyl-amino acid conjugates biosynthesis II	jasmonoyl-amino acid conjugates biosynthesis II	PWY-6233	jasmonoyl-amino acid conjugates biosynthesis II
Biosynthesis	Hormone Biosynthesis	Plant Hormone Biosynthesis	5-deoxystrigol biosynthesis	5-deoxystrigol biosynthesis	5-deoxystrigol biosynthesis	5-deoxystrigol biosynthesis	5-deoxystrigol biosynthesis	PWY-7101	5-deoxystrigol biosynthesis
Biosynthesis	Hormone Biosynthesis	(8E,10E)-dodeca-8,10-dienol biosynthesis	(8E,10E)-dodeca-8,10-dienol biosynthesis	(8E,10E)-dodeca-8,10-dienol biosynthesis	(8E,10E)-dodeca-8,10-dienol biosynthesis	(8E,10E)-dodeca-8,10-dienol biosynthesis	(8E,10E)-dodeca-8,10-dienol biosynthesis	PWY-7654	(8E,10E)-dodeca-8,10-dienol biosynthesis
Biosynthesis	Hormone Biosynthesis	15-epi-lipoxin biosynthesis	15-epi-lipoxin biosynthesis	15-epi-lipoxin biosynthesis	15-epi-lipoxin biosynthesis	15-epi-lipoxin biosynthesis	15-epi-lipoxin biosynthesis	PWY66-393	15-epi-lipoxin biosynthesis
Biosynthesis	Hormone Biosynthesis	Spodoptera littoralis pheromone biosynthesis	Spodoptera littoralis pheromone biosynthesis	Spodoptera littoralis pheromone biosynthesis	Spodoptera littoralis pheromone biosynthesis	Spodoptera littoralis pheromone biosynthesis	Spodoptera littoralis pheromone biosynthesis	PWY-7656	Spodoptera littoralis pheromone biosynthesis
Biosynthesis	Hormone Biosynthesis	androgen biosynthesis	androgen biosynthesis	androgen biosynthesis	androgen biosynthesis	androgen biosynthesis	androgen biosynthesis	PWY66-378	androgen biosynthesis
Biosynthesis	Hormone Biosynthesis	aspirin triggered resolvin D biosynthesis	aspirin triggered resolvin D biosynthesis	aspirin triggered resolvin D biosynthesis	aspirin triggered resolvin D biosynthesis	aspirin triggered resolvin D biosynthesis	aspirin triggered resolvin D biosynthesis	PWY66-395	aspirin triggered resolvin D biosynthesis
Biosynthesis	Hormone Biosynthesis	aspirin triggered resolvin E biosynthesis	aspirin triggered resolvin E biosynthesis	aspirin triggered resolvin E biosynthesis	aspirin triggered resolvin E biosynthesis	aspirin triggered resolvin E biosynthesis	aspirin triggered resolvin E biosynthesis	PWY66-394	aspirin triggered resolvin E biosynthesis
Biosynthesis	Hormone Biosynthesis	bombykol biosynthesis	bombykol biosynthesis	bombykol biosynthesis	bombykol biosynthesis	bombykol biosynthesis	bombykol biosynthesis	PWY-7423	bombykol biosynthesis
Biosynthesis	Hormone Biosynthesis	C20 prostanoid biosynthesis	C20 prostanoid biosynthesis	C20 prostanoid biosynthesis	C20 prostanoid biosynthesis	C20 prostanoid biosynthesis	C20 prostanoid biosynthesis	PWY66-374	C20 prostanoid biosynthesis
Biosynthesis	Hormone Biosynthesis	catecholamine biosynthesis	catecholamine biosynthesis	catecholamine biosynthesis	catecholamine biosynthesis	catecholamine biosynthesis	catecholamine biosynthesis	PWY66-301	catecholamine biosynthesis
Biosynthesis	Hormone Biosynthesis	ecdysone and 20-hydroxyecdysone biosynthesis	ecdysone and 20-hydroxyecdysone biosynthesis	ecdysone and 20-hydroxyecdysone biosynthesis	ecdysone and 20-hydroxyecdysone biosynthesis	ecdysone and 20-hydroxyecdysone biosynthesis	ecdysone and 20-hydroxyecdysone biosynthesis	PWY-7300	ecdysone and 20-hydroxyecdysone biosynthesis
Biosynthesis	Hormone Biosynthesis	estradiol biosynthesis I (via estrone)	estradiol biosynthesis I (via estrone)	estradiol biosynthesis I (via estrone)	estradiol biosynthesis I (via estrone)	estradiol biosynthesis I (via estrone)	estradiol biosynthesis I (via estrone)	PWY66-380	estradiol biosynthesis I (via estrone)
Biosynthesis	Hormone Biosynthesis	estradiol biosynthesis II	estradiol biosynthesis II	estradiol biosynthesis II	estradiol biosynthesis II	estradiol biosynthesis II	estradiol biosynthesis II	PWY-7306	estradiol biosynthesis II
Biosynthesis	Hormone Biosynthesis	glucocorticoid biosynthesis	glucocorticoid biosynthesis	glucocorticoid biosynthesis	glucocorticoid biosynthesis	glucocorticoid biosynthesis	glucocorticoid biosynthesis	PWY66-381	glucocorticoid biosynthesis
Biosynthesis	Hormone Biosynthesis	ipsdienol biosynthesis	ipsdienol biosynthesis	ipsdienol biosynthesis	ipsdienol biosynthesis	ipsdienol biosynthesis	ipsdienol biosynthesis	PWY-7410	ipsdienol biosynthesis
Biosynthesis	Hormone Biosynthesis	juvenile hormone III biosynthesis I	juvenile hormone III biosynthesis I	juvenile hormone III biosynthesis I	juvenile hormone III biosynthesis I	juvenile hormone III biosynthesis I	juvenile hormone III biosynthesis I	PWY-6575	juvenile hormone III biosynthesis I
Biosynthesis	Hormone Biosynthesis	juvenile hormone III biosynthesis II	juvenile hormone III biosynthesis II	juvenile hormone III biosynthesis II	juvenile hormone III biosynthesis II	juvenile hormone III biosynthesis II	juvenile hormone III biosynthesis II	PWY-6650	juvenile hormone III biosynthesis II
Biosynthesis	Hormone Biosynthesis	leukotriene biosynthesis	leukotriene biosynthesis	leukotriene biosynthesis	leukotriene biosynthesis	leukotriene biosynthesis	leukotriene biosynthesis	PWY66-375	leukotriene biosynthesis
Biosynthesis	Hormone Biosynthesis	lipoxin biosynthesis	lipoxin biosynthesis	lipoxin biosynthesis	lipoxin biosynthesis	lipoxin biosynthesis	lipoxin biosynthesis	PWY66-392	lipoxin biosynthesis
Biosynthesis	Hormone Biosynthesis	mineralocorticoid biosynthesis	mineralocorticoid biosynthesis	mineralocorticoid biosynthesis	mineralocorticoid biosynthesis	mineralocorticoid biosynthesis	mineralocorticoid biosynthesis	PWY66-382	mineralocorticoid biosynthesis
Biosynthesis	Hormone Biosynthesis	pregnenolone biosynthesis	pregnenolone biosynthesis	pregnenolone biosynthesis	pregnenolone biosynthesis	pregnenolone biosynthesis	pregnenolone biosynthesis	PWY66-377	pregnenolone biosynthesis
Biosynthesis	Hormone Biosynthesis	progesterone biosynthesis	progesterone biosynthesis	progesterone biosynthesis	progesterone biosynthesis	progesterone biosynthesis	progesterone biosynthesis	PWY-7299	progesterone biosynthesis
Biosynthesis	Hormone Biosynthesis	resolvin D biosynthesis	resolvin D biosynthesis	resolvin D biosynthesis	resolvin D biosynthesis	resolvin D biosynthesis	resolvin D biosynthesis	PWY66-397	resolvin D biosynthesis
Biosynthesis	Hormone Biosynthesis	serotonin and melatonin biosynthesis	serotonin and melatonin biosynthesis	serotonin and melatonin biosynthesis	serotonin and melatonin biosynthesis	serotonin and melatonin biosynthesis	serotonin and melatonin biosynthesis	PWY-6030	serotonin and melatonin biosynthesis
Biosynthesis	Hormone Biosynthesis	superpathway of steroid hormone biosynthesis	superpathway of steroid hormone biosynthesis	superpathway of steroid hormone biosynthesis	superpathway of steroid hormone biosynthesis	superpathway of steroid hormone biosynthesis	superpathway of steroid hormone biosynthesis	PWY-7305	superpathway of steroid hormone biosynthesis
Biosynthesis	Hormone Biosynthesis	thyroid hormone biosynthesis	thyroid hormone biosynthesis	thyroid hormone biosynthesis	thyroid hormone biosynthesis	thyroid hormone biosynthesis	thyroid hormone biosynthesis	PWY-6241	thyroid hormone biosynthesis
Biosynthesis	Hormone Biosynthesis	vitamin D3 biosynthesis	vitamin D3 biosynthesis	vitamin D3 biosynthesis	vitamin D3 biosynthesis	vitamin D3 biosynthesis	vitamin D3 biosynthesis	PWY-6076	vitamin D3 biosynthesis
Biosynthesis	Metabolic Regulator Biosynthesis	Dipeptide Biosynthesis	homocarnosine biosynthesis	homocarnosine biosynthesis	homocarnosine biosynthesis	homocarnosine biosynthesis	homocarnosine biosynthesis	PWY66-421	homocarnosine biosynthesis
Biosynthesis	Metabolic Regulator Biosynthesis	Nitric Oxide Biosynthesis	nitric oxide biosynthesis I (plants)	nitric oxide biosynthesis I (plants)	nitric oxide biosynthesis I (plants)	nitric oxide biosynthesis I (plants)	nitric oxide biosynthesis I (plants)	PWY-6845	nitric oxide biosynthesis I (plants)
Biosynthesis	Metabolic Regulator Biosynthesis	Nitric Oxide Biosynthesis	nitric oxide biosynthesis II (mammals)	nitric oxide biosynthesis II (mammals)	nitric oxide biosynthesis II (mammals)	nitric oxide biosynthesis II (mammals)	nitric oxide biosynthesis II (mammals)	PWY-4983	nitric oxide biosynthesis II (mammals)
Biosynthesis	Metabolic Regulator Biosynthesis	Nitric Oxide Biosynthesis	nitric oxide biosynthesis III (bacteria)	nitric oxide biosynthesis III (bacteria)	nitric oxide biosynthesis III (bacteria)	nitric oxide biosynthesis III (bacteria)	nitric oxide biosynthesis III (bacteria)	PWY-7860	nitric oxide biosynthesis III (bacteria)
Biosynthesis	Metabolic Regulator Biosynthesis	Organic Solute Biosynthesis	Dimethylsulfoniopropanoate Biosynthesis	dimethylsulfoniopropanoate biosynthesis I (Wollastonia)	dimethylsulfoniopropanoate biosynthesis I (Wollastonia)	dimethylsulfoniopropanoate biosynthesis I (Wollastonia)	dimethylsulfoniopropanoate biosynthesis I (Wollastonia)	PWY-6054	dimethylsulfoniopropanoate biosynthesis I (Wollastonia)
Biosynthesis	Metabolic Regulator Biosynthesis	Organic Solute Biosynthesis	Dimethylsulfoniopropanoate Biosynthesis	dimethylsulfoniopropanoate biosynthesis II (Spartina)	dimethylsulfoniopropanoate biosynthesis II (Spartina)	dimethylsulfoniopropanoate biosynthesis II (Spartina)	dimethylsulfoniopropanoate biosynthesis II (Spartina)	PWY-6055	dimethylsulfoniopropanoate biosynthesis II (Spartina)
Biosynthesis	Metabolic Regulator Biosynthesis	Organic Solute Biosynthesis	Dimethylsulfoniopropanoate Biosynthesis	dimethylsulfoniopropanoate biosynthesis III (algae)	dimethylsulfoniopropanoate biosynthesis III (algae)	dimethylsulfoniopropanoate biosynthesis III (algae)	dimethylsulfoniopropanoate biosynthesis III (algae)	PWY-6053	dimethylsulfoniopropanoate biosynthesis III (algae)
Biosynthesis	Metabolic Regulator Biosynthesis	Organic Solute Biosynthesis	Glucosylglycerate Biosynthesis	glucosylglycerate biosynthesis I	glucosylglycerate biosynthesis I	glucosylglycerate biosynthesis I	glucosylglycerate biosynthesis I	PWY-5662	glucosylglycerate biosynthesis I
Biosynthesis	Metabolic Regulator Biosynthesis	Organic Solute Biosynthesis	Glucosylglycerate Biosynthesis	glucosylglycerate biosynthesis II	glucosylglycerate biosynthesis II	glucosylglycerate biosynthesis II	glucosylglycerate biosynthesis II	PWY-6685	glucosylglycerate biosynthesis II
Biosynthesis	Metabolic Regulator Biosynthesis	Organic Solute Biosynthesis	Mannosylglucosylglycerate Biosynthesis	mannosylglucosylglycerate biosynthesis I	mannosylglucosylglycerate biosynthesis I	mannosylglucosylglycerate biosynthesis I	mannosylglucosylglycerate biosynthesis I	PWY-6686	mannosylglucosylglycerate biosynthesis I
Biosynthesis	Metabolic Regulator Biosynthesis	Organic Solute Biosynthesis	Mannosylglucosylglycerate Biosynthesis	mannosylglucosylglycerate biosynthesis II	mannosylglucosylglycerate biosynthesis II	mannosylglucosylglycerate biosynthesis II	mannosylglucosylglycerate biosynthesis II	PWY-6687	mannosylglucosylglycerate biosynthesis II
Biosynthesis	Metabolic Regulator Biosynthesis	Organic Solute Biosynthesis	Mannosylglycerate Biosynthesis	mannosylglycerate biosynthesis I	mannosylglycerate biosynthesis I	mannosylglycerate biosynthesis I	mannosylglycerate biosynthesis I	PWY-5656	mannosylglycerate biosynthesis I
Biosynthesis	Metabolic Regulator Biosynthesis	Organic Solute Biosynthesis	Mannosylglycerate Biosynthesis	mannosylglycerate biosynthesis II	mannosylglycerate biosynthesis II	mannosylglycerate biosynthesis II	mannosylglycerate biosynthesis II	PWY-5658	mannosylglycerate biosynthesis II
Biosynthesis	Metabolic Regulator Biosynthesis	Organic Solute Biosynthesis	Trehalose Biosynthesis	trehalose biosynthesis I	trehalose biosynthesis I	trehalose biosynthesis I	trehalose biosynthesis I	TRESYN-PWY	trehalose biosynthesis I
Biosynthesis	Metabolic Regulator Biosynthesis	Organic Solute Biosynthesis	Trehalose Biosynthesis	trehalose biosynthesis II	trehalose biosynthesis II	trehalose biosynthesis II	trehalose biosynthesis II	PWY-881	trehalose biosynthesis II
Biosynthesis	Metabolic Regulator Biosynthesis	Organic Solute Biosynthesis	Trehalose Biosynthesis	trehalose biosynthesis III	trehalose biosynthesis III	trehalose biosynthesis III	trehalose biosynthesis III	TREHALOSESYN-PWY	trehalose biosynthesis III
Biosynthesis	Metabolic Regulator Biosynthesis	Organic Solute Biosynthesis	Trehalose Biosynthesis	trehalose biosynthesis IV	trehalose biosynthesis IV	trehalose biosynthesis IV	trehalose biosynthesis IV	PWY-2622	trehalose biosynthesis IV
Biosynthesis	Metabolic Regulator Biosynthesis	Organic Solute Biosynthesis	Trehalose Biosynthesis	trehalose biosynthesis V	trehalose biosynthesis V	trehalose biosynthesis V	trehalose biosynthesis V	PWY-2661	trehalose biosynthesis V
Biosynthesis	Metabolic Regulator Biosynthesis	Organic Solute Biosynthesis	Trehalose Biosynthesis	trehalose biosynthesis VI	trehalose biosynthesis VI	trehalose biosynthesis VI	trehalose biosynthesis VI	PWY-5983	trehalose biosynthesis VI
Biosynthesis	Metabolic Regulator Biosynthesis	Organic Solute Biosynthesis	Trehalose Biosynthesis	trehalose biosynthesis VII	trehalose biosynthesis VII	trehalose biosynthesis VII	trehalose biosynthesis VII	PWY-5985	trehalose biosynthesis VII
Biosynthesis	Metabolic Regulator Biosynthesis	Organic Solute Biosynthesis	N-acetylglutaminylglutamine amide biosynthesis	N-acetylglutaminylglutamine amide biosynthesis	N-acetylglutaminylglutamine amide biosynthesis	N-acetylglutaminylglutamine amide biosynthesis	N-acetylglutaminylglutamine amide biosynthesis	PWY-7054	N-acetylglutaminylglutamine amide biosynthesis
Biosynthesis	Metabolic Regulator Biosynthesis	Organic Solute Biosynthesis	cyclic 2,3-bisphosphoglycerate biosynthesis	cyclic 2,3-bisphosphoglycerate biosynthesis	cyclic 2,3-bisphosphoglycerate biosynthesis	cyclic 2,3-bisphosphoglycerate biosynthesis	cyclic 2,3-bisphosphoglycerate biosynthesis	PWY-8098	cyclic 2,3-bisphosphoglycerate biosynthesis
Biosynthesis	Metabolic Regulator Biosynthesis	Organic Solute Biosynthesis	di-myo-inositol phosphate biosynthesis	di-myo-inositol phosphate biosynthesis	di-myo-inositol phosphate biosynthesis	di-myo-inositol phosphate biosynthesis	di-myo-inositol phosphate biosynthesis	PWY-6664	di-myo-inositol phosphate biosynthesis
Biosynthesis	Metabolic Regulator Biosynthesis	carnosine biosynthesis	carnosine biosynthesis	carnosine biosynthesis	carnosine biosynthesis	carnosine biosynthesis	carnosine biosynthesis	PWY66-420	carnosine biosynthesis
Biosynthesis	Metabolic Regulator Biosynthesis	creatine-phosphate biosynthesis	creatine-phosphate biosynthesis	creatine-phosphate biosynthesis	creatine-phosphate biosynthesis	creatine-phosphate biosynthesis	creatine-phosphate biosynthesis	PWY-6158	creatine-phosphate biosynthesis
Biosynthesis	Metabolic Regulator Biosynthesis	fructose 2,6-bisphosphate biosynthesis	fructose 2,6-bisphosphate biosynthesis	fructose 2,6-bisphosphate biosynthesis	fructose 2,6-bisphosphate biosynthesis	fructose 2,6-bisphosphate biosynthesis	fructose 2,6-bisphosphate biosynthesis	PWY66-423	fructose 2,6-bisphosphate biosynthesis
Biosynthesis	Metabolic Regulator Biosynthesis	L-carnitine biosynthesis	L-carnitine biosynthesis	L-carnitine biosynthesis	L-carnitine biosynthesis	L-carnitine biosynthesis	L-carnitine biosynthesis	PWY-6100	L-carnitine biosynthesis
Biosynthesis	Metabolic Regulator Biosynthesis	lovastatin biosynthesis	lovastatin biosynthesis	lovastatin biosynthesis	lovastatin biosynthesis	lovastatin biosynthesis	lovastatin biosynthesis	PWY-7535	lovastatin biosynthesis
Biosynthesis	Metabolic Regulator Biosynthesis	ppGpp metabolism	ppGpp metabolism	ppGpp metabolism	ppGpp metabolism	ppGpp metabolism	ppGpp metabolism	PPGPPMET-PWY	ppGpp metabolism
Biosynthesis	Metabolic Regulator Biosynthesis	Rapoport-Luebering glycolytic shunt	Rapoport-Luebering glycolytic shunt	Rapoport-Luebering glycolytic shunt	Rapoport-Luebering glycolytic shunt	Rapoport-Luebering glycolytic shunt	Rapoport-Luebering glycolytic shunt	PWY-6405	Rapoport-Luebering glycolytic shunt
Biosynthesis	Nucleoside and Nucleotide Biosynthesis	2'-Deoxyribonucleotide Biosynthesis	Purine Deoxyribonucleotide De Novo Biosynthesis	Adenosine Deoxyribonucleotide De Novo Biosynthesis	adenosine deoxyribonucleotides de novo biosynthesis	adenosine deoxyribonucleotides de novo biosynthesis	adenosine deoxyribonucleotides de novo biosynthesis	PWY-7227	adenosine deoxyribonucleotides de novo biosynthesis
Biosynthesis	Nucleoside and Nucleotide Biosynthesis	2'-Deoxyribonucleotide Biosynthesis	Purine Deoxyribonucleotide De Novo Biosynthesis	Adenosine Deoxyribonucleotide De Novo Biosynthesis	adenosine deoxyribonucleotides de novo biosynthesis II	adenosine deoxyribonucleotides de novo biosynthesis II	adenosine deoxyribonucleotides de novo biosynthesis II	PWY-7220	adenosine deoxyribonucleotides de novo biosynthesis II
Biosynthesis	Nucleoside and Nucleotide Biosynthesis	2'-Deoxyribonucleotide Biosynthesis	Purine Deoxyribonucleotide De Novo Biosynthesis	Guanosine Deoxyribonucleotide De Novo Biosynthesis	guanosine deoxyribonucleotides de novo biosynthesis I	guanosine deoxyribonucleotides de novo biosynthesis I	guanosine deoxyribonucleotides de novo biosynthesis I	PWY-7226	guanosine deoxyribonucleotides de novo biosynthesis I
Biosynthesis	Nucleoside and Nucleotide Biosynthesis	2'-Deoxyribonucleotide Biosynthesis	Purine Deoxyribonucleotide De Novo Biosynthesis	Guanosine Deoxyribonucleotide De Novo Biosynthesis	guanosine deoxyribonucleotides de novo biosynthesis II	guanosine deoxyribonucleotides de novo biosynthesis II	guanosine deoxyribonucleotides de novo biosynthesis II	PWY-7222	guanosine deoxyribonucleotides de novo biosynthesis II
Biosynthesis	Nucleoside and Nucleotide Biosynthesis	2'-Deoxyribonucleotide Biosynthesis	Pyrimidine Deoxyribonucleotide De Novo Biosynthesis	pyrimidine deoxyribonucleotides de novo biosynthesis I	pyrimidine deoxyribonucleotides de novo biosynthesis I	pyrimidine deoxyribonucleotides de novo biosynthesis I	pyrimidine deoxyribonucleotides de novo biosynthesis I	PWY-7184	pyrimidine deoxyribonucleotides de novo biosynthesis I
Biosynthesis	Nucleoside and Nucleotide Biosynthesis	2'-Deoxyribonucleotide Biosynthesis	Pyrimidine Deoxyribonucleotide De Novo Biosynthesis	pyrimidine deoxyribonucleotides de novo biosynthesis II	pyrimidine deoxyribonucleotides de novo biosynthesis II	pyrimidine deoxyribonucleotides de novo biosynthesis II	pyrimidine deoxyribonucleotides de novo biosynthesis II	PWY-7187	pyrimidine deoxyribonucleotides de novo biosynthesis II
Biosynthesis	Nucleoside and Nucleotide Biosynthesis	2'-Deoxyribonucleotide Biosynthesis	Pyrimidine Deoxyribonucleotide De Novo Biosynthesis	pyrimidine deoxyribonucleotides de novo biosynthesis III	pyrimidine deoxyribonucleotides de novo biosynthesis III	pyrimidine deoxyribonucleotides de novo biosynthesis III	pyrimidine deoxyribonucleotides de novo biosynthesis III	PWY-6545	pyrimidine deoxyribonucleotides de novo biosynthesis III
Biosynthesis	Nucleoside and Nucleotide Biosynthesis	2'-Deoxyribonucleotide Biosynthesis	Pyrimidine Deoxyribonucleotide De Novo Biosynthesis	pyrimidine deoxyribonucleotides de novo biosynthesis IV	pyrimidine deoxyribonucleotides de novo biosynthesis IV	pyrimidine deoxyribonucleotides de novo biosynthesis IV	pyrimidine deoxyribonucleotides de novo biosynthesis IV	PWY-7198	pyrimidine deoxyribonucleotides de novo biosynthesis IV
Biosynthesis	Nucleoside and Nucleotide Biosynthesis	2'-Deoxyribonucleotide Biosynthesis	Pyrimidine Deoxyribonucleotide De Novo Biosynthesis	superpathway of pyrimidine deoxyribonucleotides de novo biosynthesis	superpathway of pyrimidine deoxyribonucleotides de novo biosynthesis	superpathway of pyrimidine deoxyribonucleotides de novo biosynthesis	superpathway of pyrimidine deoxyribonucleotides de novo biosynthesis	PWY-7211	superpathway of pyrimidine deoxyribonucleotides de novo biosynthesis
Biosynthesis	Nucleoside and Nucleotide Biosynthesis	2'-Deoxyribonucleotide Biosynthesis	Pyrimidine Deoxyribonucleotide De Novo Biosynthesis	superpathway of pyrimidine deoxyribonucleotides de novo biosynthesis (E. coli)	superpathway of pyrimidine deoxyribonucleotides de novo biosynthesis (E. coli)	superpathway of pyrimidine deoxyribonucleotides de novo biosynthesis (E. coli)	superpathway of pyrimidine deoxyribonucleotides de novo biosynthesis (E. coli)	PWY0-166	superpathway of pyrimidine deoxyribonucleotides de novo biosynthesis (E. coli)
Biosynthesis	Nucleoside and Nucleotide Biosynthesis	Purine Nucleotide Biosynthesis	5-Aminoimidazole Ribonucleotide Biosynthesis	5-aminoimidazole ribonucleotide biosynthesis I	5-aminoimidazole ribonucleotide biosynthesis I	5-aminoimidazole ribonucleotide biosynthesis I	5-aminoimidazole ribonucleotide biosynthesis I	PWY-6121	5-aminoimidazole ribonucleotide biosynthesis I
Biosynthesis	Nucleoside and Nucleotide Biosynthesis	Purine Nucleotide Biosynthesis	5-Aminoimidazole Ribonucleotide Biosynthesis	5-aminoimidazole ribonucleotide biosynthesis II	5-aminoimidazole ribonucleotide biosynthesis II	5-aminoimidazole ribonucleotide biosynthesis II	5-aminoimidazole ribonucleotide biosynthesis II	PWY-6122	5-aminoimidazole ribonucleotide biosynthesis II
Biosynthesis	Nucleoside and Nucleotide Biosynthesis	Purine Nucleotide Biosynthesis	5-Aminoimidazole Ribonucleotide Biosynthesis	superpathway of 5-aminoimidazole ribonucleotide biosynthesis	superpathway of 5-aminoimidazole ribonucleotide biosynthesis	superpathway of 5-aminoimidazole ribonucleotide biosynthesis	superpathway of 5-aminoimidazole ribonucleotide biosynthesis	PWY-6277	superpathway of 5-aminoimidazole ribonucleotide biosynthesis
Biosynthesis	Nucleoside and Nucleotide Biosynthesis	Purine Nucleotide Biosynthesis	Purine Nucleotide De Novo Biosynthesis	Purine Deoxyribonucleotide De Novo Biosynthesis	Adenosine Deoxyribonucleotide De Novo Biosynthesis	adenosine deoxyribonucleotides de novo biosynthesis	adenosine deoxyribonucleotides de novo biosynthesis	PWY-7227	adenosine deoxyribonucleotides de novo biosynthesis
Biosynthesis	Nucleoside and Nucleotide Biosynthesis	Purine Nucleotide Biosynthesis	Purine Nucleotide De Novo Biosynthesis	Purine Deoxyribonucleotide De Novo Biosynthesis	Adenosine Deoxyribonucleotide De Novo Biosynthesis	adenosine deoxyribonucleotides de novo biosynthesis II	adenosine deoxyribonucleotides de novo biosynthesis II	PWY-7220	adenosine deoxyribonucleotides de novo biosynthesis II
Biosynthesis	Nucleoside and Nucleotide Biosynthesis	Purine Nucleotide Biosynthesis	Purine Nucleotide De Novo Biosynthesis	Purine Deoxyribonucleotide De Novo Biosynthesis	Guanosine Deoxyribonucleotide De Novo Biosynthesis	guanosine deoxyribonucleotides de novo biosynthesis I	guanosine deoxyribonucleotides de novo biosynthesis I	PWY-7226	guanosine deoxyribonucleotides de novo biosynthesis I
Biosynthesis	Nucleoside and Nucleotide Biosynthesis	Purine Nucleotide Biosynthesis	Purine Nucleotide De Novo Biosynthesis	Purine Deoxyribonucleotide De Novo Biosynthesis	Guanosine Deoxyribonucleotide De Novo Biosynthesis	guanosine deoxyribonucleotides de novo biosynthesis II	guanosine deoxyribonucleotides de novo biosynthesis II	PWY-7222	guanosine deoxyribonucleotides de novo biosynthesis II
Biosynthesis	Nucleoside and Nucleotide Biosynthesis	Purine Nucleotide Biosynthesis	Purine Nucleotide De Novo Biosynthesis	Purine Riboucleotide De Novo Biosynthesis	Inosine-5'-phosphate Biosynthesis	inosine-5'-phosphate biosynthesis I	inosine-5'-phosphate biosynthesis I	PWY-6123	inosine-5'-phosphate biosynthesis I
Biosynthesis	Nucleoside and Nucleotide Biosynthesis	Purine Nucleotide Biosynthesis	Purine Nucleotide De Novo Biosynthesis	Purine Riboucleotide De Novo Biosynthesis	Inosine-5'-phosphate Biosynthesis	inosine-5'-phosphate biosynthesis II	inosine-5'-phosphate biosynthesis II	PWY-6124	inosine-5'-phosphate biosynthesis II
Biosynthesis	Nucleoside and Nucleotide Biosynthesis	Purine Nucleotide Biosynthesis	Purine Nucleotide De Novo Biosynthesis	Purine Riboucleotide De Novo Biosynthesis	Inosine-5'-phosphate Biosynthesis	inosine-5'-phosphate biosynthesis III	inosine-5'-phosphate biosynthesis III	PWY-7234	inosine-5'-phosphate biosynthesis III
Biosynthesis	Nucleoside and Nucleotide Biosynthesis	Purine Nucleotide Biosynthesis	Purine Nucleotide De Novo Biosynthesis	Purine Riboucleotide De Novo Biosynthesis	adenosine ribonucleotides de novo biosynthesis	adenosine ribonucleotides de novo biosynthesis	adenosine ribonucleotides de novo biosynthesis	PWY-7219	adenosine ribonucleotides de novo biosynthesis
Biosynthesis	Nucleoside and Nucleotide Biosynthesis	Purine Nucleotide Biosynthesis	Purine Nucleotide De Novo Biosynthesis	Purine Riboucleotide De Novo Biosynthesis	guanosine ribonucleotides de novo biosynthesis	guanosine ribonucleotides de novo biosynthesis	guanosine ribonucleotides de novo biosynthesis	PWY-7221	guanosine ribonucleotides de novo biosynthesis
Biosynthesis	Nucleoside and Nucleotide Biosynthesis	Purine Nucleotide Biosynthesis	Purine Nucleotide De Novo Biosynthesis	superpathway of adenosine nucleotides de novo biosynthesis I	superpathway of adenosine nucleotides de novo biosynthesis I	superpathway of adenosine nucleotides de novo biosynthesis I	superpathway of adenosine nucleotides de novo biosynthesis I	PWY-7229	superpathway of adenosine nucleotides de novo biosynthesis I
Biosynthesis	Nucleoside and Nucleotide Biosynthesis	Purine Nucleotide Biosynthesis	Purine Nucleotide De Novo Biosynthesis	superpathway of adenosine nucleotides de novo biosynthesis II	superpathway of adenosine nucleotides de novo biosynthesis II	superpathway of adenosine nucleotides de novo biosynthesis II	superpathway of adenosine nucleotides de novo biosynthesis II	PWY-6126	superpathway of adenosine nucleotides de novo biosynthesis II
Biosynthesis	Nucleoside and Nucleotide Biosynthesis	Purine Nucleotide Biosynthesis	Purine Nucleotide De Novo Biosynthesis	superpathway of guanosine nucleotides de novo biosynthesis I	superpathway of guanosine nucleotides de novo biosynthesis I	superpathway of guanosine nucleotides de novo biosynthesis I	superpathway of guanosine nucleotides de novo biosynthesis I	PWY-7228	superpathway of guanosine nucleotides de novo biosynthesis I
Biosynthesis	Nucleoside and Nucleotide Biosynthesis	Purine Nucleotide Biosynthesis	Purine Nucleotide De Novo Biosynthesis	superpathway of guanosine nucleotides de novo biosynthesis II	superpathway of guanosine nucleotides de novo biosynthesis II	superpathway of guanosine nucleotides de novo biosynthesis II	superpathway of guanosine nucleotides de novo biosynthesis II	PWY-6125	superpathway of guanosine nucleotides de novo biosynthesis II
Biosynthesis	Nucleoside and Nucleotide Biosynthesis	Purine Nucleotide Biosynthesis	Purine Nucleotide De Novo Biosynthesis	superpathway of purine nucleotides de novo biosynthesis I	superpathway of purine nucleotides de novo biosynthesis I	superpathway of purine nucleotides de novo biosynthesis I	superpathway of purine nucleotides de novo biosynthesis I	PWY-841	superpathway of purine nucleotides de novo biosynthesis I
Biosynthesis	Nucleoside and Nucleotide Biosynthesis	Purine Nucleotide Biosynthesis	Purine Nucleotide De Novo Biosynthesis	superpathway of purine nucleotides de novo biosynthesis II	superpathway of purine nucleotides de novo biosynthesis II	superpathway of purine nucleotides de novo biosynthesis II	superpathway of purine nucleotides de novo biosynthesis II	DENOVOPURINE2-PWY	superpathway of purine nucleotides de novo biosynthesis II
Biosynthesis	Nucleoside and Nucleotide Biosynthesis	Purine Nucleotide Biosynthesis	Purine Nucleotide Salvage	Adenine and Adenosine Salvage	adenine and adenosine salvage I	adenine and adenosine salvage I	adenine and adenosine salvage I	P121-PWY	adenine and adenosine salvage I
Biosynthesis	Nucleoside and Nucleotide Biosynthesis	Purine Nucleotide Biosynthesis	Purine Nucleotide Salvage	Adenine and Adenosine Salvage	adenine and adenosine salvage II	adenine and adenosine salvage II	adenine and adenosine salvage II	PWY-6605	adenine and adenosine salvage II
Biosynthesis	Nucleoside and Nucleotide Biosynthesis	Purine Nucleotide Biosynthesis	Purine Nucleotide Salvage	Adenine and Adenosine Salvage	adenine and adenosine salvage III	adenine and adenosine salvage III	adenine and adenosine salvage III	PWY-6609	adenine and adenosine salvage III
Biosynthesis	Nucleoside and Nucleotide Biosynthesis	Purine Nucleotide Biosynthesis	Purine Nucleotide Salvage	Adenine and Adenosine Salvage	adenine and adenosine salvage V	adenine and adenosine salvage V	adenine and adenosine salvage V	PWY-6611	adenine and adenosine salvage V
Biosynthesis	Nucleoside and Nucleotide Biosynthesis	Purine Nucleotide Biosynthesis	Purine Nucleotide Salvage	Adenine and Adenosine Salvage	adenine and adenosine salvage VI	adenine and adenosine salvage VI	adenine and adenosine salvage VI	PWY-6619	adenine and adenosine salvage VI
Biosynthesis	Nucleoside and Nucleotide Biosynthesis	Purine Nucleotide Biosynthesis	Purine Nucleotide Salvage	Adenine and Adenosine Salvage	adenine salvage	adenine salvage	adenine salvage	PWY-6610	adenine salvage
Biosynthesis	Nucleoside and Nucleotide Biosynthesis	Purine Nucleotide Biosynthesis	Purine Nucleotide Salvage	Guanine and Guanosine Salvage	guanine and guanosine salvage	guanine and guanosine salvage	guanine and guanosine salvage	PWY-6620	guanine and guanosine salvage
Biosynthesis	Nucleoside and Nucleotide Biosynthesis	Purine Nucleotide Biosynthesis	Purine Nucleotide Salvage	Guanine and Guanosine Salvage	guanine and guanosine salvage II	guanine and guanosine salvage II	guanine and guanosine salvage II	PWY-6599	guanine and guanosine salvage II
Biosynthesis	Nucleoside and Nucleotide Biosynthesis	Purine Nucleotide Biosynthesis	Purine Nucleotide Salvage	Guanine and Guanosine Salvage	guanine and guanosine salvage III	guanine and guanosine salvage III	guanine and guanosine salvage III	PWY-6618	guanine and guanosine salvage III
Biosynthesis	Nucleoside and Nucleotide Biosynthesis	Purine Nucleotide Biosynthesis	Purine Nucleotide Salvage	Guanine and Guanosine Salvage	superpathway of guanine and guanosine salvage	superpathway of guanine and guanosine salvage	superpathway of guanine and guanosine salvage	PWY-6579	superpathway of guanine and guanosine salvage
Biosynthesis	Nucleoside and Nucleotide Biosynthesis	Purine Nucleotide Biosynthesis	Purine Nucleotide Salvage	purine deoxyribonucleosides salvage	purine deoxyribonucleosides salvage	purine deoxyribonucleosides salvage	purine deoxyribonucleosides salvage	PWY-7224	purine deoxyribonucleosides salvage
Biosynthesis	Nucleoside and Nucleotide Biosynthesis	Purine Nucleotide Biosynthesis	Purine Nucleotide Salvage	superpathway of purine nucleotide salvage	superpathway of purine nucleotide salvage	superpathway of purine nucleotide salvage	superpathway of purine nucleotide salvage	PWY66-409	superpathway of purine nucleotide salvage
Biosynthesis	Nucleoside and Nucleotide Biosynthesis	Purine Nucleotide Biosynthesis	Purine Nucleotide Salvage	xanthine and xanthosine salvage	xanthine and xanthosine salvage	xanthine and xanthosine salvage	xanthine and xanthosine salvage	SALVPURINE2-PWY	xanthine and xanthosine salvage
Biosynthesis	Nucleoside and Nucleotide Biosynthesis	Purine Nucleotide Biosynthesis	adenosine 5'-phosphoramidate biosynthesis	adenosine 5'-phosphoramidate biosynthesis	adenosine 5'-phosphoramidate biosynthesis	adenosine 5'-phosphoramidate biosynthesis	adenosine 5'-phosphoramidate biosynthesis	PWY-6794	adenosine 5'-phosphoramidate biosynthesis
Biosynthesis	Nucleoside and Nucleotide Biosynthesis	Pyrimidine Nucleotide Biosynthesis	Pyrimidine Nucleotide De Novo Biosynthesis	Pyrimidine Deoxyribonucleotide De Novo Biosynthesis	pyrimidine deoxyribonucleotides de novo biosynthesis I	pyrimidine deoxyribonucleotides de novo biosynthesis I	pyrimidine deoxyribonucleotides de novo biosynthesis I	PWY-7184	pyrimidine deoxyribonucleotides de novo biosynthesis I
Biosynthesis	Nucleoside and Nucleotide Biosynthesis	Pyrimidine Nucleotide Biosynthesis	Pyrimidine Nucleotide De Novo Biosynthesis	Pyrimidine Deoxyribonucleotide De Novo Biosynthesis	pyrimidine deoxyribonucleotides de novo biosynthesis II	pyrimidine deoxyribonucleotides de novo biosynthesis II	pyrimidine deoxyribonucleotides de novo biosynthesis II	PWY-7187	pyrimidine deoxyribonucleotides de novo biosynthesis II
Biosynthesis	Nucleoside and Nucleotide Biosynthesis	Pyrimidine Nucleotide Biosynthesis	Pyrimidine Nucleotide De Novo Biosynthesis	Pyrimidine Deoxyribonucleotide De Novo Biosynthesis	pyrimidine deoxyribonucleotides de novo biosynthesis III	pyrimidine deoxyribonucleotides de novo biosynthesis III	pyrimidine deoxyribonucleotides de novo biosynthesis III	PWY-6545	pyrimidine deoxyribonucleotides de novo biosynthesis III
Biosynthesis	Nucleoside and Nucleotide Biosynthesis	Pyrimidine Nucleotide Biosynthesis	Pyrimidine Nucleotide De Novo Biosynthesis	Pyrimidine Deoxyribonucleotide De Novo Biosynthesis	pyrimidine deoxyribonucleotides de novo biosynthesis IV	pyrimidine deoxyribonucleotides de novo biosynthesis IV	pyrimidine deoxyribonucleotides de novo biosynthesis IV	PWY-7198	pyrimidine deoxyribonucleotides de novo biosynthesis IV
Biosynthesis	Nucleoside and Nucleotide Biosynthesis	Pyrimidine Nucleotide Biosynthesis	Pyrimidine Nucleotide De Novo Biosynthesis	Pyrimidine Deoxyribonucleotide De Novo Biosynthesis	superpathway of pyrimidine deoxyribonucleotides de novo biosynthesis	superpathway of pyrimidine deoxyribonucleotides de novo biosynthesis	superpathway of pyrimidine deoxyribonucleotides de novo biosynthesis	PWY-7211	superpathway of pyrimidine deoxyribonucleotides de novo biosynthesis
Biosynthesis	Nucleoside and Nucleotide Biosynthesis	Pyrimidine Nucleotide Biosynthesis	Pyrimidine Nucleotide De Novo Biosynthesis	Pyrimidine Deoxyribonucleotide De Novo Biosynthesis	superpathway of pyrimidine deoxyribonucleotides de novo biosynthesis (E. coli)	superpathway of pyrimidine deoxyribonucleotides de novo biosynthesis (E. coli)	superpathway of pyrimidine deoxyribonucleotides de novo biosynthesis (E. coli)	PWY0-166	superpathway of pyrimidine deoxyribonucleotides de novo biosynthesis (E. coli)
Biosynthesis	Nucleoside and Nucleotide Biosynthesis	Pyrimidine Nucleotide Biosynthesis	Pyrimidine Nucleotide De Novo Biosynthesis	Pyrimidine Ribonucleotide De Novo Biosynthesis	UMP Biosynthesis	UMP biosynthesis I	UMP biosynthesis I	PWY-5686	UMP biosynthesis I
Biosynthesis	Nucleoside and Nucleotide Biosynthesis	Pyrimidine Nucleotide Biosynthesis	Pyrimidine Nucleotide De Novo Biosynthesis	Pyrimidine Ribonucleotide De Novo Biosynthesis	UMP Biosynthesis	UMP biosynthesis II	UMP biosynthesis II	PWY-7790	UMP biosynthesis II
Biosynthesis	Nucleoside and Nucleotide Biosynthesis	Pyrimidine Nucleotide Biosynthesis	Pyrimidine Nucleotide De Novo Biosynthesis	Pyrimidine Ribonucleotide De Novo Biosynthesis	UMP Biosynthesis	UMP biosynthesis III	UMP biosynthesis III	PWY-7791	UMP biosynthesis III
Biosynthesis	Nucleoside and Nucleotide Biosynthesis	Pyrimidine Nucleotide Biosynthesis	Pyrimidine Nucleotide De Novo Biosynthesis	Pyrimidine Ribonucleotide De Novo Biosynthesis	superpathway of pyrimidine ribonucleotides de novo biosynthesis	superpathway of pyrimidine ribonucleotides de novo biosynthesis	superpathway of pyrimidine ribonucleotides de novo biosynthesis	PWY0-162	superpathway of pyrimidine ribonucleotides de novo biosynthesis
Biosynthesis	Nucleoside and Nucleotide Biosynthesis	Pyrimidine Nucleotide Biosynthesis	Pyrimidine Nucleotide De Novo Biosynthesis	Pyrimidine Ribonucleotide De Novo Biosynthesis	UTP and CTP de novo biosynthesis	UTP and CTP de novo biosynthesis	UTP and CTP de novo biosynthesis	PWY-7176	UTP and CTP de novo biosynthesis
Biosynthesis	Nucleoside and Nucleotide Biosynthesis	Pyrimidine Nucleotide Biosynthesis	Pyrimidine Nucleotide Salvage	CMP phosphorylation	CMP phosphorylation	CMP phosphorylation	CMP phosphorylation	PWY-7205	CMP phosphorylation
Biosynthesis	Nucleoside and Nucleotide Biosynthesis	Pyrimidine Nucleotide Biosynthesis	Pyrimidine Nucleotide Salvage	pyrimidine deoxyribonucleosides salvage	pyrimidine deoxyribonucleosides salvage	pyrimidine deoxyribonucleosides salvage	pyrimidine deoxyribonucleosides salvage	PWY-7199	pyrimidine deoxyribonucleosides salvage
Biosynthesis	Nucleoside and Nucleotide Biosynthesis	Pyrimidine Nucleotide Biosynthesis	Pyrimidine Nucleotide Salvage	pyrimidine deoxyribonucleotide phosphorylation	pyrimidine deoxyribonucleotide phosphorylation	pyrimidine deoxyribonucleotide phosphorylation	pyrimidine deoxyribonucleotide phosphorylation	PWY-7197	pyrimidine deoxyribonucleotide phosphorylation
Biosynthesis	Nucleoside and Nucleotide Biosynthesis	Pyrimidine Nucleotide Biosynthesis	Pyrimidine Nucleotide Salvage	pyrimidine deoxyribonucleotides biosynthesis from CTP	pyrimidine deoxyribonucleotides biosynthesis from CTP	pyrimidine deoxyribonucleotides biosynthesis from CTP	pyrimidine deoxyribonucleotides biosynthesis from CTP	PWY-7210	pyrimidine deoxyribonucleotides biosynthesis from CTP
Biosynthesis	Nucleoside and Nucleotide Biosynthesis	Pyrimidine Nucleotide Biosynthesis	Pyrimidine Nucleotide Salvage	pyrimidine nucleobases salvage I	pyrimidine nucleobases salvage I	pyrimidine nucleobases salvage I	pyrimidine nucleobases salvage I	PWY-7183	pyrimidine nucleobases salvage I
Biosynthesis	Nucleoside and Nucleotide Biosynthesis	Pyrimidine Nucleotide Biosynthesis	Pyrimidine Nucleotide Salvage	pyrimidine nucleobases salvage II	pyrimidine nucleobases salvage II	pyrimidine nucleobases salvage II	pyrimidine nucleobases salvage II	PWY-7194	pyrimidine nucleobases salvage II
Biosynthesis	Nucleoside and Nucleotide Biosynthesis	Pyrimidine Nucleotide Biosynthesis	Pyrimidine Nucleotide Salvage	pyrimidine ribonucleosides salvage I	pyrimidine ribonucleosides salvage I	pyrimidine ribonucleosides salvage I	pyrimidine ribonucleosides salvage I	PWY-7193	pyrimidine ribonucleosides salvage I
Biosynthesis	Nucleoside and Nucleotide Biosynthesis	Pyrimidine Nucleotide Biosynthesis	Pyrimidine Nucleotide Salvage	pyrimidine ribonucleosides salvage II	pyrimidine ribonucleosides salvage II	pyrimidine ribonucleosides salvage II	pyrimidine ribonucleosides salvage II	PWY-6556	pyrimidine ribonucleosides salvage II
Biosynthesis	Nucleoside and Nucleotide Biosynthesis	Pyrimidine Nucleotide Biosynthesis	Pyrimidine Nucleotide Salvage	pyrimidine ribonucleosides salvage III	pyrimidine ribonucleosides salvage III	pyrimidine ribonucleosides salvage III	pyrimidine ribonucleosides salvage III	PWY-7195	pyrimidine ribonucleosides salvage III
Biosynthesis	Nucleoside and Nucleotide Biosynthesis	Pyrimidine Nucleotide Biosynthesis	Pyrimidine Nucleotide Salvage	superpathway of pyrimidine deoxyribonucleoside salvage	superpathway of pyrimidine deoxyribonucleoside salvage	superpathway of pyrimidine deoxyribonucleoside salvage	superpathway of pyrimidine deoxyribonucleoside salvage	PWY-7200	superpathway of pyrimidine deoxyribonucleoside salvage
Biosynthesis	Nucleoside and Nucleotide Biosynthesis	Pyrimidine Nucleotide Biosynthesis	Pyrimidine Nucleotide Salvage	superpathway of pyrimidine nucleobases salvage	superpathway of pyrimidine nucleobases salvage	superpathway of pyrimidine nucleobases salvage	superpathway of pyrimidine nucleobases salvage	PWY-7208	superpathway of pyrimidine nucleobases salvage
Biosynthesis	Nucleoside and Nucleotide Biosynthesis	Pyrimidine Nucleotide Biosynthesis	Pyrimidine Nucleotide Salvage	superpathway of pyrimidine ribonucleosides salvage	superpathway of pyrimidine ribonucleosides salvage	superpathway of pyrimidine ribonucleosides salvage	superpathway of pyrimidine ribonucleosides salvage	PWY-7196	superpathway of pyrimidine ribonucleosides salvage
Biosynthesis	Other Biosynthesis	8-Amino-7-oxononanoate Biosynthesis	8-amino-7-oxononanoate biosynthesis I	8-amino-7-oxononanoate biosynthesis I	8-amino-7-oxononanoate biosynthesis I	8-amino-7-oxononanoate biosynthesis I	8-amino-7-oxononanoate biosynthesis I	PWY-6519	8-amino-7-oxononanoate biosynthesis I
Biosynthesis	Other Biosynthesis	8-Amino-7-oxononanoate Biosynthesis	8-amino-7-oxononanoate biosynthesis II	8-amino-7-oxononanoate biosynthesis II	8-amino-7-oxononanoate biosynthesis II	8-amino-7-oxononanoate biosynthesis II	8-amino-7-oxononanoate biosynthesis II	PWY-7147	8-amino-7-oxononanoate biosynthesis II
Biosynthesis	Other Biosynthesis	8-Amino-7-oxononanoate Biosynthesis	8-amino-7-oxononanoate biosynthesis III	8-amino-7-oxononanoate biosynthesis III	8-amino-7-oxononanoate biosynthesis III	8-amino-7-oxononanoate biosynthesis III	8-amino-7-oxononanoate biosynthesis III	PWY-6578	8-amino-7-oxononanoate biosynthesis III
Biosynthesis	Other Biosynthesis	Butanediol Biosynthesis	(R,R)-butanediol biosynthesis	(R,R)-butanediol biosynthesis	(R,R)-butanediol biosynthesis	(R,R)-butanediol biosynthesis	(R,R)-butanediol biosynthesis	PWY-5951	(R,R)-butanediol biosynthesis
Biosynthesis	Other Biosynthesis	Butanediol Biosynthesis	(S,S)-butanediol biosynthesis	(S,S)-butanediol biosynthesis	(S,S)-butanediol biosynthesis	(S,S)-butanediol biosynthesis	(S,S)-butanediol biosynthesis	PWY-6390	(S,S)-butanediol biosynthesis
Biosynthesis	Other Biosynthesis	Butanediol Biosynthesis	meso-butanediol biosynthesis I	meso-butanediol biosynthesis I	meso-butanediol biosynthesis I	meso-butanediol biosynthesis I	meso-butanediol biosynthesis I	PWY-6391	meso-butanediol biosynthesis I
Biosynthesis	Other Biosynthesis	Butanediol Biosynthesis	meso-butanediol biosynthesis II	meso-butanediol biosynthesis II	meso-butanediol biosynthesis II	meso-butanediol biosynthesis II	meso-butanediol biosynthesis II	PWY-6392	meso-butanediol biosynthesis II
Biosynthesis	Other Biosynthesis	Butanediol Biosynthesis	superpathway of (R,R)-butanediol biosynthesis	superpathway of (R,R)-butanediol biosynthesis	superpathway of (R,R)-butanediol biosynthesis	superpathway of (R,R)-butanediol biosynthesis	superpathway of (R,R)-butanediol biosynthesis	P125-PWY	superpathway of (R,R)-butanediol biosynthesis
Biosynthesis	Other Biosynthesis	Butanediol Biosynthesis	superpathway of 2,3-butanediol biosynthesis	superpathway of 2,3-butanediol biosynthesis	superpathway of 2,3-butanediol biosynthesis	superpathway of 2,3-butanediol biosynthesis	superpathway of 2,3-butanediol biosynthesis	PWY-6396	superpathway of 2,3-butanediol biosynthesis
Biosynthesis	Other Biosynthesis	drosopterin and aurodrosopterin biosynthesis	drosopterin and aurodrosopterin biosynthesis	drosopterin and aurodrosopterin biosynthesis	drosopterin and aurodrosopterin biosynthesis	drosopterin and aurodrosopterin biosynthesis	drosopterin and aurodrosopterin biosynthesis	PWY-7442	drosopterin and aurodrosopterin biosynthesis
Biosynthesis	Other Biosynthesis	eumelanin biosynthesis	eumelanin biosynthesis	eumelanin biosynthesis	eumelanin biosynthesis	eumelanin biosynthesis	eumelanin biosynthesis	PWY-6498	eumelanin biosynthesis
Biosynthesis	Other Biosynthesis	L-dopa and L-dopachrome biosynthesis	L-dopa and L-dopachrome biosynthesis	L-dopa and L-dopachrome biosynthesis	L-dopa and L-dopachrome biosynthesis	L-dopa and L-dopachrome biosynthesis	L-dopa and L-dopachrome biosynthesis	PWY-6481	L-dopa and L-dopachrome biosynthesis
Biosynthesis	Other Biosynthesis	methylhalides biosynthesis (plants)	methylhalides biosynthesis (plants)	methylhalides biosynthesis (plants)	methylhalides biosynthesis (plants)	methylhalides biosynthesis (plants)	methylhalides biosynthesis (plants)	PWY-6730	methylhalides biosynthesis (plants)
Biosynthesis	Other Biosynthesis	methylphosphonate biosynthesis	methylphosphonate biosynthesis	methylphosphonate biosynthesis	methylphosphonate biosynthesis	methylphosphonate biosynthesis	methylphosphonate biosynthesis	PWY-8067	methylphosphonate biosynthesis
Biosynthesis	Other Biosynthesis	ophthalmate biosynthesis	ophthalmate biosynthesis	ophthalmate biosynthesis	ophthalmate biosynthesis	ophthalmate biosynthesis	ophthalmate biosynthesis	PWY-8043	ophthalmate biosynthesis
Biosynthesis	Other Biosynthesis	pheomelanin biosynthesis	pheomelanin biosynthesis	pheomelanin biosynthesis	pheomelanin biosynthesis	pheomelanin biosynthesis	pheomelanin biosynthesis	PWY-7917	pheomelanin biosynthesis
Biosynthesis	Secondary Metabolite Biosynthesis	3-hydroxy-4-methyl-anthranilate biosynthesis	3-hydroxy-4-methyl-anthranilate biosynthesis I	3-hydroxy-4-methyl-anthranilate biosynthesis I	3-hydroxy-4-methyl-anthranilate biosynthesis I	3-hydroxy-4-methyl-anthranilate biosynthesis I	3-hydroxy-4-methyl-anthranilate biosynthesis I	PWY-7717	3-hydroxy-4-methyl-anthranilate biosynthesis I
Biosynthesis	Secondary Metabolite Biosynthesis	3-hydroxy-4-methyl-anthranilate biosynthesis	3-hydroxy-4-methyl-anthranilate biosynthesis II	3-hydroxy-4-methyl-anthranilate biosynthesis II	3-hydroxy-4-methyl-anthranilate biosynthesis II	3-hydroxy-4-methyl-anthranilate biosynthesis II	3-hydroxy-4-methyl-anthranilate biosynthesis II	PWY-7765	3-hydroxy-4-methyl-anthranilate biosynthesis II
Biosynthesis	Secondary Metabolite Biosynthesis	Antibiotic Biosynthesis	Aurachin Biosynthesis	aurachin A, B, C and D biosynthesis	aurachin A, B, C and D biosynthesis	aurachin A, B, C and D biosynthesis	aurachin A, B, C and D biosynthesis	PWY-7407	aurachin A, B, C and D biosynthesis
Biosynthesis	Secondary Metabolite Biosynthesis	Antibiotic Biosynthesis	Aurachin Biosynthesis	aurachin RE biosynthesis	aurachin RE biosynthesis	aurachin RE biosynthesis	aurachin RE biosynthesis	PWY-7405	aurachin RE biosynthesis
Biosynthesis	Secondary Metabolite Biosynthesis	Antibiotic Biosynthesis	Cyclopeptide Biosynthesis	apicidin biosynthesis	apicidin biosynthesis	apicidin biosynthesis	apicidin biosynthesis	PWY-7667	apicidin biosynthesis
Biosynthesis	Secondary Metabolite Biosynthesis	Antibiotic Biosynthesis	Cyclopeptide Biosynthesis	apicidin F biosynthesis	apicidin F biosynthesis	apicidin F biosynthesis	apicidin F biosynthesis	PWY-7668	apicidin F biosynthesis
Biosynthesis	Secondary Metabolite Biosynthesis	Antibiotic Biosynthesis	Lipopeptide Biosynthesis	echinocandin B biosynthesis	echinocandin B biosynthesis	echinocandin B biosynthesis	echinocandin B biosynthesis	PWY-7650	echinocandin B biosynthesis
Biosynthesis	Secondary Metabolite Biosynthesis	Antibiotic Biosynthesis	Macrolide Antibiotic Biosynthesis	erythromycin A biosynthesis	erythromycin A biosynthesis	erythromycin A biosynthesis	erythromycin A biosynthesis	PWY-7108	erythromycin A biosynthesis
Biosynthesis	Secondary Metabolite Biosynthesis	Antibiotic Biosynthesis	Macrolide Antibiotic Biosynthesis	erythromycin D biosynthesis	erythromycin D biosynthesis	erythromycin D biosynthesis	erythromycin D biosynthesis	PWY-7106	erythromycin D biosynthesis
Biosynthesis	Secondary Metabolite Biosynthesis	Antibiotic Biosynthesis	Macrolide Antibiotic Biosynthesis	megalomicin A biosynthesis	megalomicin A biosynthesis	megalomicin A biosynthesis	megalomicin A biosynthesis	PWY-7109	megalomicin A biosynthesis
Biosynthesis	Secondary Metabolite Biosynthesis	Antibiotic Biosynthesis	Macrolide Antibiotic Biosynthesis	methymycin, neomethymycin and novamethymycin biosynthesis	methymycin, neomethymycin and novamethymycin biosynthesis	methymycin, neomethymycin and novamethymycin biosynthesis	methymycin, neomethymycin and novamethymycin biosynthesis	PWY-7422	methymycin, neomethymycin and novamethymycin biosynthesis
Biosynthesis	Secondary Metabolite Biosynthesis	Antibiotic Biosynthesis	Macrolide Antibiotic Biosynthesis	mycinamicin biosynthesis	mycinamicin biosynthesis	mycinamicin biosynthesis	mycinamicin biosynthesis	PWY-7412	mycinamicin biosynthesis
Biosynthesis	Secondary Metabolite Biosynthesis	Antibiotic Biosynthesis	Macrolide Antibiotic Biosynthesis	narbomycin, pikromycin and novapikromycin biosynthesis	narbomycin, pikromycin and novapikromycin biosynthesis	narbomycin, pikromycin and novapikromycin biosynthesis	narbomycin, pikromycin and novapikromycin biosynthesis	PWY-7421	narbomycin, pikromycin and novapikromycin biosynthesis
Biosynthesis	Secondary Metabolite Biosynthesis	Antibiotic Biosynthesis	Macrolide Antibiotic Biosynthesis	nystatin biosynthesis	nystatin biosynthesis	nystatin biosynthesis	nystatin biosynthesis	PWY-7624	nystatin biosynthesis
Biosynthesis	Secondary Metabolite Biosynthesis	Antibiotic Biosynthesis	Macrolide Antibiotic Biosynthesis	oleandomycin biosynthesis	oleandomycin biosynthesis	oleandomycin biosynthesis	oleandomycin biosynthesis	PWY-6971	oleandomycin biosynthesis
Biosynthesis	Secondary Metabolite Biosynthesis	Antibiotic Biosynthesis	Macrolide Antibiotic Biosynthesis	rosamicin biosynthesis	rosamicin biosynthesis	rosamicin biosynthesis	rosamicin biosynthesis	PWY-7677	rosamicin biosynthesis
Biosynthesis	Secondary Metabolite Biosynthesis	Antibiotic Biosynthesis	Macrolide Antibiotic Biosynthesis	superpathway of erythromycin biosynthesis	superpathway of erythromycin biosynthesis	superpathway of erythromycin biosynthesis	superpathway of erythromycin biosynthesis	PWY-6977	superpathway of erythromycin biosynthesis
Biosynthesis	Secondary Metabolite Biosynthesis	Antibiotic Biosynthesis	Macrolide Antibiotic Biosynthesis	superpathway of erythromycin biosynthesis (without sugar biosynthesis)	superpathway of erythromycin biosynthesis (without sugar biosynthesis)	superpathway of erythromycin biosynthesis (without sugar biosynthesis)	superpathway of erythromycin biosynthesis (without sugar biosynthesis)	PWY-6975	superpathway of erythromycin biosynthesis (without sugar biosynthesis)
Biosynthesis	Secondary Metabolite Biosynthesis	Antibiotic Biosynthesis	Macrolide Antibiotic Biosynthesis	superpathway of megalomicin A biosynthesis	superpathway of megalomicin A biosynthesis	superpathway of megalomicin A biosynthesis	superpathway of megalomicin A biosynthesis	PWY-7110	superpathway of megalomicin A biosynthesis
Biosynthesis	Secondary Metabolite Biosynthesis	Antibiotic Biosynthesis	Macrolide Antibiotic Biosynthesis	tylosin biosynthesis	tylosin biosynthesis	tylosin biosynthesis	tylosin biosynthesis	PWY-7415	tylosin biosynthesis
Biosynthesis	Secondary Metabolite Biosynthesis	Antibiotic Biosynthesis	Paromamine Biosynthesis	paromamine biosynthesis I	paromamine biosynthesis I	paromamine biosynthesis I	paromamine biosynthesis I	PWY-7014	paromamine biosynthesis I
Biosynthesis	Secondary Metabolite Biosynthesis	Antibiotic Biosynthesis	Paromamine Biosynthesis	paromamine biosynthesis II	paromamine biosynthesis II	paromamine biosynthesis II	paromamine biosynthesis II	PWY-7022	paromamine biosynthesis II
Biosynthesis	Secondary Metabolite Biosynthesis	Antibiotic Biosynthesis	(5R)-carbapenem carboxylate biosynthesis	(5R)-carbapenem carboxylate biosynthesis	(5R)-carbapenem carboxylate biosynthesis	(5R)-carbapenem carboxylate biosynthesis	(5R)-carbapenem carboxylate biosynthesis	PWY-5737	(5R)-carbapenem carboxylate biosynthesis
Biosynthesis	Secondary Metabolite Biosynthesis	Antibiotic Biosynthesis	2-hydroxyphenazine biosynthesis	2-hydroxyphenazine biosynthesis	2-hydroxyphenazine biosynthesis	2-hydroxyphenazine biosynthesis	2-hydroxyphenazine biosynthesis	PWY-5776	2-hydroxyphenazine biosynthesis
Biosynthesis	Secondary Metabolite Biosynthesis	Antibiotic Biosynthesis	3-hydroxyquinaldate biosynthesis	3-hydroxyquinaldate biosynthesis	3-hydroxyquinaldate biosynthesis	3-hydroxyquinaldate biosynthesis	3-hydroxyquinaldate biosynthesis	PWY-7733	3-hydroxyquinaldate biosynthesis
Biosynthesis	Secondary Metabolite Biosynthesis	Antibiotic Biosynthesis	3-methylarginine biosynthesis	3-methylarginine biosynthesis	3-methylarginine biosynthesis	3-methylarginine biosynthesis	3-methylarginine biosynthesis	PWY-6511	3-methylarginine biosynthesis
Biosynthesis	Secondary Metabolite Biosynthesis	Antibiotic Biosynthesis	3-[(E)-2-isocyanoethenyl]-1H-indole biosynthesis	3-[(E)-2-isocyanoethenyl]-1H-indole biosynthesis	3-[(E)-2-isocyanoethenyl]-1H-indole biosynthesis	3-[(E)-2-isocyanoethenyl]-1H-indole biosynthesis	3-[(E)-2-isocyanoethenyl]-1H-indole biosynthesis	PWY-7956	3-[(E)-2-isocyanoethenyl]-1H-indole biosynthesis
Biosynthesis	Secondary Metabolite Biosynthesis	Antibiotic Biosynthesis	6'-dechloromelleolide F biosynthesis	6'-dechloromelleolide F biosynthesis	6'-dechloromelleolide F biosynthesis	6'-dechloromelleolide F biosynthesis	6'-dechloromelleolide F biosynthesis	PWY-7911	6'-dechloromelleolide F biosynthesis
Biosynthesis	Secondary Metabolite Biosynthesis	Antibiotic Biosynthesis	6-methylpretetramide biosynthesis	6-methylpretetramide biosynthesis	6-methylpretetramide biosynthesis	6-methylpretetramide biosynthesis	6-methylpretetramide biosynthesis	PWY-7811	6-methylpretetramide biosynthesis
Biosynthesis	Secondary Metabolite Biosynthesis	Antibiotic Biosynthesis	aclacinomycin biosynthesis	aclacinomycin biosynthesis	aclacinomycin biosynthesis	aclacinomycin biosynthesis	aclacinomycin biosynthesis	PWY-7354	aclacinomycin biosynthesis
Biosynthesis	Secondary Metabolite Biosynthesis	Antibiotic Biosynthesis	actinomycin D biosynthesis	actinomycin D biosynthesis	actinomycin D biosynthesis	actinomycin D biosynthesis	actinomycin D biosynthesis	PWY-7718	actinomycin D biosynthesis
Biosynthesis	Secondary Metabolite Biosynthesis	Antibiotic Biosynthesis	actinorhodin biosynthesis	actinorhodin biosynthesis	actinorhodin biosynthesis	actinorhodin biosynthesis	actinorhodin biosynthesis	PWY1A0-6325	actinorhodin biosynthesis
Biosynthesis	Secondary Metabolite Biosynthesis	Antibiotic Biosynthesis	albaflavenone biosynthesis	albaflavenone biosynthesis	albaflavenone biosynthesis	albaflavenone biosynthesis	albaflavenone biosynthesis	PWY-5887	albaflavenone biosynthesis
Biosynthesis	Secondary Metabolite Biosynthesis	Antibiotic Biosynthesis	ansatrienin biosynthesis	ansatrienin biosynthesis	ansatrienin biosynthesis	ansatrienin biosynthesis	ansatrienin biosynthesis	PWY-8040	ansatrienin biosynthesis
Biosynthesis	Secondary Metabolite Biosynthesis	Antibiotic Biosynthesis	arginomycin biosynthesis	arginomycin biosynthesis	arginomycin biosynthesis	arginomycin biosynthesis	arginomycin biosynthesis	PWY-7569	arginomycin biosynthesis
Biosynthesis	Secondary Metabolite Biosynthesis	Antibiotic Biosynthesis	aureobasidin A biosynthesis	aureobasidin A biosynthesis	aureobasidin A biosynthesis	aureobasidin A biosynthesis	aureobasidin A biosynthesis	PWY-7665	aureobasidin A biosynthesis
Biosynthesis	Secondary Metabolite Biosynthesis	Antibiotic Biosynthesis	aureothin biosynthesis	aureothin biosynthesis	aureothin biosynthesis	aureothin biosynthesis	aureothin biosynthesis	PWY-8033	aureothin biosynthesis
Biosynthesis	Secondary Metabolite Biosynthesis	Antibiotic Biosynthesis	bacilysin biosynthesis	bacilysin biosynthesis	bacilysin biosynthesis	bacilysin biosynthesis	bacilysin biosynthesis	PWY-7626	bacilysin biosynthesis
Biosynthesis	Secondary Metabolite Biosynthesis	Antibiotic Biosynthesis	bacimethrin and bacimethrin pyrophosphate biosynthesis	bacimethrin and bacimethrin pyrophosphate biosynthesis	bacimethrin and bacimethrin pyrophosphate biosynthesis	bacimethrin and bacimethrin pyrophosphate biosynthesis	bacimethrin and bacimethrin pyrophosphate biosynthesis	PWY-7564	bacimethrin and bacimethrin pyrophosphate biosynthesis
Biosynthesis	Secondary Metabolite Biosynthesis	Antibiotic Biosynthesis	blasticidin S biosynthesis	blasticidin S biosynthesis	blasticidin S biosynthesis	blasticidin S biosynthesis	blasticidin S biosynthesis	PWY-7570	blasticidin S biosynthesis
Biosynthesis	Secondary Metabolite Biosynthesis	Antibiotic Biosynthesis	butirosin biosynthesis	butirosin biosynthesis	butirosin biosynthesis	butirosin biosynthesis	butirosin biosynthesis	PWY-7019	butirosin biosynthesis
Biosynthesis	Secondary Metabolite Biosynthesis	Antibiotic Biosynthesis	candicidin biosynthesis	candicidin biosynthesis	candicidin biosynthesis	candicidin biosynthesis	candicidin biosynthesis	PWY-6722	candicidin biosynthesis
Biosynthesis	Secondary Metabolite Biosynthesis	Antibiotic Biosynthesis	cephalosporin C biosynthesis	cephalosporin C biosynthesis	cephalosporin C biosynthesis	cephalosporin C biosynthesis	cephalosporin C biosynthesis	PWY-5632	cephalosporin C biosynthesis
Biosynthesis	Secondary Metabolite Biosynthesis	Antibiotic Biosynthesis	cephamycin C biosynthesis	cephamycin C biosynthesis	cephamycin C biosynthesis	cephamycin C biosynthesis	cephamycin C biosynthesis	PWY-5633	cephamycin C biosynthesis
Biosynthesis	Secondary Metabolite Biosynthesis	Antibiotic Biosynthesis	chaxamycin biosynthesis	chaxamycin biosynthesis	chaxamycin biosynthesis	chaxamycin biosynthesis	chaxamycin biosynthesis	PWY-8036	chaxamycin biosynthesis
Biosynthesis	Secondary Metabolite Biosynthesis	Antibiotic Biosynthesis	chloramphenicol biosynthesis	chloramphenicol biosynthesis	chloramphenicol biosynthesis	chloramphenicol biosynthesis	chloramphenicol biosynthesis	PWY-8032	chloramphenicol biosynthesis
Biosynthesis	Secondary Metabolite Biosynthesis	Antibiotic Biosynthesis	chlorotetracycline biosynthesis	chlorotetracycline biosynthesis	chlorotetracycline biosynthesis	chlorotetracycline biosynthesis	chlorotetracycline biosynthesis	PWY-7810	chlorotetracycline biosynthesis
Biosynthesis	Secondary Metabolite Biosynthesis	Antibiotic Biosynthesis	clavulanate biosynthesis	clavulanate biosynthesis	clavulanate biosynthesis	clavulanate biosynthesis	clavulanate biosynthesis	PWY-5679	clavulanate biosynthesis
Biosynthesis	Secondary Metabolite Biosynthesis	Antibiotic Biosynthesis	D-cycloserine biosynthesis	D-cycloserine biosynthesis	D-cycloserine biosynthesis	D-cycloserine biosynthesis	D-cycloserine biosynthesis	PWY-7274	D-cycloserine biosynthesis
Biosynthesis	Secondary Metabolite Biosynthesis	Antibiotic Biosynthesis	dapdiamides biosynthesis	dapdiamides biosynthesis	dapdiamides biosynthesis	dapdiamides biosynthesis	dapdiamides biosynthesis	PWY-7706	dapdiamides biosynthesis
Biosynthesis	Secondary Metabolite Biosynthesis	Antibiotic Biosynthesis	daunorubicin biosynthesis	daunorubicin biosynthesis	daunorubicin biosynthesis	daunorubicin biosynthesis	daunorubicin biosynthesis	PWY-7352	daunorubicin biosynthesis
Biosynthesis	Secondary Metabolite Biosynthesis	Antibiotic Biosynthesis	deacetylcephalosporin C biosynthesis	deacetylcephalosporin C biosynthesis	deacetylcephalosporin C biosynthesis	deacetylcephalosporin C biosynthesis	deacetylcephalosporin C biosynthesis	PWY-5631	deacetylcephalosporin C biosynthesis
Biosynthesis	Secondary Metabolite Biosynthesis	Antibiotic Biosynthesis	dechlorogriseofulvin biosynthesis	dechlorogriseofulvin biosynthesis	dechlorogriseofulvin biosynthesis	dechlorogriseofulvin biosynthesis	dechlorogriseofulvin biosynthesis	PWY-7655	dechlorogriseofulvin biosynthesis
Biosynthesis	Secondary Metabolite Biosynthesis	Antibiotic Biosynthesis	dehydrophos biosynthesis	dehydrophos biosynthesis	dehydrophos biosynthesis	dehydrophos biosynthesis	dehydrophos biosynthesis	PWY-6682	dehydrophos biosynthesis
Biosynthesis	Secondary Metabolite Biosynthesis	Antibiotic Biosynthesis	doxorubicin biosynthesis	doxorubicin biosynthesis	doxorubicin biosynthesis	doxorubicin biosynthesis	doxorubicin biosynthesis	PWY-7355	doxorubicin biosynthesis
Biosynthesis	Secondary Metabolite Biosynthesis	Antibiotic Biosynthesis	echinomycin and triostin A biosynthesis	echinomycin and triostin A biosynthesis	echinomycin and triostin A biosynthesis	echinomycin and triostin A biosynthesis	echinomycin and triostin A biosynthesis	PWY-7735	echinomycin and triostin A biosynthesis
Biosynthesis	Secondary Metabolite Biosynthesis	Antibiotic Biosynthesis	elloramycin biosynthesis	elloramycin biosynthesis	elloramycin biosynthesis	elloramycin biosynthesis	elloramycin biosynthesis	PWY-7483	elloramycin biosynthesis
Biosynthesis	Secondary Metabolite Biosynthesis	Antibiotic Biosynthesis	equisetin biosynthesis	equisetin biosynthesis	equisetin biosynthesis	equisetin biosynthesis	equisetin biosynthesis	PWY-7669	equisetin biosynthesis
Biosynthesis	Secondary Metabolite Biosynthesis	Antibiotic Biosynthesis	fosfomycin biosynthesis	fosfomycin biosynthesis	fosfomycin biosynthesis	fosfomycin biosynthesis	fosfomycin biosynthesis	PWY-5757	fosfomycin biosynthesis
Biosynthesis	Secondary Metabolite Biosynthesis	Antibiotic Biosynthesis	FR-900098 and FR-33289 antibiotics biosynthesis	FR-900098 and FR-33289 antibiotics biosynthesis	FR-900098 and FR-33289 antibiotics biosynthesis	FR-900098 and FR-33289 antibiotics biosynthesis	FR-900098 and FR-33289 antibiotics biosynthesis	PWY-7419	FR-900098 and FR-33289 antibiotics biosynthesis
Biosynthesis	Secondary Metabolite Biosynthesis	Antibiotic Biosynthesis	fusaridione A biosynthesis	fusaridione A biosynthesis	fusaridione A biosynthesis	fusaridione A biosynthesis	fusaridione A biosynthesis	PWY-7670	fusaridione A biosynthesis
Biosynthesis	Secondary Metabolite Biosynthesis	Antibiotic Biosynthesis	gentamicin biosynthesis	gentamicin biosynthesis	gentamicin biosynthesis	gentamicin biosynthesis	gentamicin biosynthesis	PWY-7025	gentamicin biosynthesis
Biosynthesis	Secondary Metabolite Biosynthesis	Antibiotic Biosynthesis	gramicidin S biosynthesis	gramicidin S biosynthesis	gramicidin S biosynthesis	gramicidin S biosynthesis	gramicidin S biosynthesis	PWY-6003	gramicidin S biosynthesis
Biosynthesis	Secondary Metabolite Biosynthesis	Antibiotic Biosynthesis	griseofulvin biosynthesis	griseofulvin biosynthesis	griseofulvin biosynthesis	griseofulvin biosynthesis	griseofulvin biosynthesis	PWY-7653	griseofulvin biosynthesis
Biosynthesis	Secondary Metabolite Biosynthesis	Antibiotic Biosynthesis	guadinomine B biosynthesis	guadinomine B biosynthesis	guadinomine B biosynthesis	guadinomine B biosynthesis	guadinomine B biosynthesis	PWY-7693	guadinomine B biosynthesis
Biosynthesis	Secondary Metabolite Biosynthesis	Antibiotic Biosynthesis	holomycin biosynthesis	holomycin biosynthesis	holomycin biosynthesis	holomycin biosynthesis	holomycin biosynthesis	PWY-7690	holomycin biosynthesis
Biosynthesis	Secondary Metabolite Biosynthesis	Antibiotic Biosynthesis	indolmycin biosynthesis	indolmycin biosynthesis	indolmycin biosynthesis	indolmycin biosynthesis	indolmycin biosynthesis	PWY-7770	indolmycin biosynthesis
Biosynthesis	Secondary Metabolite Biosynthesis	Antibiotic Biosynthesis	isopenicillin N biosynthesis	isopenicillin N biosynthesis	isopenicillin N biosynthesis	isopenicillin N biosynthesis	isopenicillin N biosynthesis	PWY-5629	isopenicillin N biosynthesis
Biosynthesis	Secondary Metabolite Biosynthesis	Antibiotic Biosynthesis	jadomycin biosynthesis	jadomycin biosynthesis	jadomycin biosynthesis	jadomycin biosynthesis	jadomycin biosynthesis	PWY-6679	jadomycin biosynthesis
Biosynthesis	Secondary Metabolite Biosynthesis	Antibiotic Biosynthesis	K-252 biosynthesis	K-252 biosynthesis	K-252 biosynthesis	K-252 biosynthesis	K-252 biosynthesis	PWY-6345	K-252 biosynthesis
Biosynthesis	Secondary Metabolite Biosynthesis	Antibiotic Biosynthesis	kanamycin biosynthesis	kanamycin biosynthesis	kanamycin biosynthesis	kanamycin biosynthesis	kanamycin biosynthesis	PWY-7000	kanamycin biosynthesis
Biosynthesis	Secondary Metabolite Biosynthesis	Antibiotic Biosynthesis	lincomycin biosynthesis	lincomycin biosynthesis	lincomycin biosynthesis	lincomycin biosynthesis	lincomycin biosynthesis	PWY-6955	lincomycin biosynthesis
Biosynthesis	Secondary Metabolite Biosynthesis	Antibiotic Biosynthesis	mithramycin biosynthesis	mithramycin biosynthesis	mithramycin biosynthesis	mithramycin biosynthesis	mithramycin biosynthesis	PWY-7045	mithramycin biosynthesis
Biosynthesis	Secondary Metabolite Biosynthesis	Antibiotic Biosynthesis	mitomycin biosynthesis	mitomycin biosynthesis	mitomycin biosynthesis	mitomycin biosynthesis	mitomycin biosynthesis	PWY-8039	mitomycin biosynthesis
Biosynthesis	Secondary Metabolite Biosynthesis	Antibiotic Biosynthesis	mupirocin biosynthesis	mupirocin biosynthesis	mupirocin biosynthesis	mupirocin biosynthesis	mupirocin biosynthesis	PWY-8012	mupirocin biosynthesis
Biosynthesis	Secondary Metabolite Biosynthesis	Antibiotic Biosynthesis	naphthomycin biosynthesis	naphthomycin biosynthesis	naphthomycin biosynthesis	naphthomycin biosynthesis	naphthomycin biosynthesis	PWY-8038	naphthomycin biosynthesis
Biosynthesis	Secondary Metabolite Biosynthesis	Antibiotic Biosynthesis	neomycin biosynthesis	neomycin biosynthesis	neomycin biosynthesis	neomycin biosynthesis	neomycin biosynthesis	PWY-7016	neomycin biosynthesis
Biosynthesis	Secondary Metabolite Biosynthesis	Antibiotic Biosynthesis	neopentalenoketolactone and pentalenate biosynthesis	neopentalenoketolactone and pentalenate biosynthesis	neopentalenoketolactone and pentalenate biosynthesis	neopentalenoketolactone and pentalenate biosynthesis	neopentalenoketolactone and pentalenate biosynthesis	PWY-6919	neopentalenoketolactone and pentalenate biosynthesis
Biosynthesis	Secondary Metabolite Biosynthesis	Antibiotic Biosynthesis	nocardicin A biosynthesis	nocardicin A biosynthesis	nocardicin A biosynthesis	nocardicin A biosynthesis	nocardicin A biosynthesis	PWY-7797	nocardicin A biosynthesis
Biosynthesis	Secondary Metabolite Biosynthesis	Antibiotic Biosynthesis	novobiocin biosynthesis	novobiocin biosynthesis	novobiocin biosynthesis	novobiocin biosynthesis	novobiocin biosynthesis	PWY-7287	novobiocin biosynthesis
Biosynthesis	Secondary Metabolite Biosynthesis	Antibiotic Biosynthesis	paromomycin biosynthesis	paromomycin biosynthesis	paromomycin biosynthesis	paromomycin biosynthesis	paromomycin biosynthesis	PWY-7018	paromomycin biosynthesis
Biosynthesis	Secondary Metabolite Biosynthesis	Antibiotic Biosynthesis	penicillin G and penicillin V biosynthesis	penicillin G and penicillin V biosynthesis	penicillin G and penicillin V biosynthesis	penicillin G and penicillin V biosynthesis	penicillin G and penicillin V biosynthesis	PWY-7716	penicillin G and penicillin V biosynthesis
Biosynthesis	Secondary Metabolite Biosynthesis	Antibiotic Biosynthesis	penicillin K biosynthesis	penicillin K biosynthesis	penicillin K biosynthesis	penicillin K biosynthesis	penicillin K biosynthesis	PWY-5630	penicillin K biosynthesis
[truncated: 3,020 more rows]
