# Supplementary material for: Two Distinct Soil Disinfestations Differently Modify the Bacterial Communities in a Tomato Field
Source: MDPI journal article supplement (doi:10.3390/agronomy11071375), 2021-07-07
Supplement: s1 [file s1 › Supplemental Table S2.xlsx]

## Sheet: Supplemental Table S2
Supplemental Table S2. Relative abundances of bacterial classes (mean relative abundance > 0.1%) in the soil samples under reductive soil disinfestation (RSD) and soil solarization (SS). The P-value and false discovery rate (FDR) were calculated by ALDEx2 analysis to detect differentially abundant taxa between RSD and SS. 0–5 w, treatment period for 0 to 5 weeks.
	ALDEx2 (RSD vs SS)		Relative abundance (%)
taxa	p-value	FDR	RSD_0w	RSD_1w	RSD_2w	RSD_3w	RSD_4w	RSD_5w	SS_0w	SS_1w	SS_2w	SS_3w	SS_4w	SS_5w
D_0__Archaea;D_1__Euryarchaeota;D_2__Methanobacteria	0.0155281	0.0334348	0.0195357	0.0388785	0.107375	0.302557	0.335255	0.472173	0.0585243	0.0380045	0.0397781	0.0277481	0.0642413	0.0218644
D_0__Archaea;D_1__Euryarchaeota;D_2__Methanomicrobia	0.50737	0.58574	0.00756687	0.0166538	0.285521	0.459385	0.463588	0.738606	0.139057	0.122381	0.0782584	0.106849	0.105813	0.051062
D_0__Archaea;D_1__Thaumarchaeota;D_2__Nitrososphaeria	0.308181	0.410872	0.921047	0.855139	0.753959	0.634564	0.633519	0.682744	1.41943	0.826507	0.756506	0.566205	1.02036	0.626931
D_0__Bacteria;D_1__Acidobacteria;D_2__Acidobacteriia	0.0712666	0.139602	0.40272	0.394261	0.560437	1.06096	1.12345	1.0838	0.494022	0.535819	0.576107	0.834456	0.58302	1.3582
D_0__Bacteria;D_1__Acidobacteria;D_2__Blastocatellia (Subgroup 4)	0.335347	0.43834	1.10848	0.883771	0.731667	0.44937	0.906602	0.556543	1.31026	1.523	1.19933	0.876301	1.00539	0.890862
D_0__Bacteria;D_1__Acidobacteria;D_2__Holophagae	0.0286019	0.0697059	0.232457	0.116269	0.166491	0.379942	0.347582	0.149749	0.327762	0.191785	0.138693	0.114524	0.13632	0.171935
D_0__Bacteria;D_1__Acidobacteria;D_2__Subgroup 17	0.700118	0.752265	0.260338	0.15099	0.111565	0.0808098	0.0244433	0	0.256909	0.142211	0.0973951	0.0297064	0.0315496	0.0190594
D_0__Bacteria;D_1__Acidobacteria;D_2__Subgroup 6	0.0847637	0.16089	4.50027	3.33992	2.50773	2.28188	2.7881	2.26459	5.06645	4.51652	4.45819	3.59341	4.70636	4.93754
D_0__Bacteria;D_1__Acidobacteria;D_2__Thermoanaerobaculia	0.00906209	0.0279293	0.117777	0.0593514	0.0402262	0.0479086	0.0486549	0.0321538	0.230767	0.12434	0.193501	0.130299	0.0838229	0.145389
D_0__Bacteria;D_1__Actinobacteria;D_2__Acidimicrobiia	2.82224e-06	5.68426e-05	0.47006	0.547143	0.406367	0.285333	0.275824	0.6483	1.17428	1.14387	1.23529	1.20776	1.69796	2.00742
D_0__Bacteria;D_1__Actinobacteria;D_2__Actinobacteria	0.527482	0.609844	16.3105	12.2392	9.10142	6.5771	7.87626	9.8635	19.1038	16.2218	16.3423	12.3546	12.1306	10.4872
D_0__Bacteria;D_1__Actinobacteria;D_2__Thermoleophilia	0.326797	0.432277	4.4183	3.55849	3.359	2.45921	2.3753	2.98321	4.76254	5.59893	4.94785	3.8191	4.61597	4.16837
D_0__Bacteria;D_1__Armatimonadetes;D_2__uncultured	0.306584	0.395109	0.0308554	0.0677282	0.220538	0.182036	0.410474	0.611889	0.0583771	0.0949752	0.0671495	0.195678	0.105028	0.282871
D_0__Bacteria;D_1__Bacteroidetes;D_2__Bacteroidia	0.819745	0.850566	3.22837	4.07696	2.51007	4.45852	3.33306	1.0467	6.22146	3.4523	4.23944	4.64138	3.18163	2.3792
D_0__Bacteria;D_1__Bacteroidetes;D_2__Ignavibacteria	0.149581	0.23554	0.0380931	0.00996401	0.235127	0.43983	0.35083	0.217441	0.0215732	0.0144659	0.0959777	0.180915	0.118227	0.295194
D_0__Bacteria;D_1__Bacteroidetes;D_2__Rhodothermia	0.798021	0.833461	0.00882802	0.0168046	0.236936	0.51865	0.375093	0.403539	0.109047	0.0368918	0.0632319	0.397156	0.0760435	0.651244
D_0__Bacteria;D_1__Chloroflexi;D_2__Anaerolineae	0.502703	0.593914	0.51331	0.567256	2.66667	5.6252	7.70667	10.9861	3.58907	2.31527	3.05141	5.2997	4.92423	9.26689
D_0__Bacteria;D_1__Chloroflexi;D_2__Chloroflexia	0.000302361	0.00214489	1.23728	1.38986	1.07163	0.929229	1.24908	1.03555	2.12291	2.29122	2.39752	1.80369	2.95308	3.19064
D_0__Bacteria;D_1__Chloroflexi;D_2__Dehalococcoidia	0.792936	0.828944	0.340988	0.132718	0.145311	0.12532	0.199532	0.192412	0.414723	0.150856	0.22498	0.248395	0.392887	0.503491
D_0__Bacteria;D_1__Chloroflexi;D_2__Gitt-GS-136	0.000574995	0.00334779	0.73904	0.636206	0.569228	0.495117	0.849968	0.993207	0.807927	1.14692	1.46676	1.40641	2.1361	2.65527
D_0__Bacteria;D_1__Chloroflexi;D_2__JG30-KF-CM66	0.0420655	0.0945269	0.16723	0.0397253	0.084875	0.0483517	0.0991087	0.151455	0.160012	0.143507	0.181192	0.157297	0.282797	0.211755
D_0__Bacteria;D_1__Chloroflexi;D_2__KD4-96	0.137252	0.223253	2.01949	1.67104	1.35182	1.34148	1.30226	1.3759	2.15553	2.17406	2.16476	1.91029	2.37692	2.89133
D_0__Bacteria;D_1__Chloroflexi;D_2__Ktedonobacteria	0.00727573	0.0227216	0.22037	0.248311	0.211923	0.191054	0.270021	0.440944	0.297237	0.401757	0.471842	0.411995	0.580097	0.665513
D_0__Bacteria;D_1__Chloroflexi;D_2__TK10	0.0800207	0.152297	0.19158	0.0673889	0.0608174	0.0595009	0.162665	0.150468	0.329264	0.197612	0.173966	0.0840211	0.2648	0.235369
D_0__Bacteria;D_1__Firmicutes;D_2__Bacilli	5.90988e-07	1.98502e-05	26.6779	10.8952	15.3501	10.0502	12.3957	15.4784	6.88703	5.79954	5.2552	3.91968	6.34255	6.17472
D_0__Bacteria;D_1__Firmicutes;D_2__Clostridia	0.000224022	0.0017932	0.420368	10.2563	17.8117	16.7664	6.53557	5.2856	1.04279	3.36045	1.2018	5.34429	1.39916	1.92667
D_0__Bacteria;D_1__Firmicutes;D_2__Negativicutes	0.00837108	0.023645	0	0.345606	0.418392	0.476191	0.332599	0.0404514	0.00697825	0.0224849	0.0109893	0.162207	0.0105573	0.0222564
D_0__Bacteria;D_1__Gemmatimonadetes;D_2__Gemmatimonadetes	0.0015583	0.00700589	3.02665	2.36608	1.74736	1.9016	2.45258	3.5766	3.37954	4.26299	5.46222	4.61064	6.62846	5.64828
D_0__Bacteria;D_1__Gemmatimonadetes;D_2__S0134 terrestrial group	0.00015719	0.00144137	0.124889	0.295395	0.344904	0.478716	0.883987	0.41561	0.660772	0.674762	1.01752	1.52894	1.20294	1.05042
D_0__Bacteria;D_1__Nitrospirae;D_2__Nitrospira	0.0482266	0.104049	0.215895	0.142992	0.0747766	0.087181	0.0657874	0.149671	0.24493	0.169456	0.216497	0.317211	0.295019	0.328163
D_0__Bacteria;D_1__Patescibacteria;D_2__Saccharimonadia	0.147582	0.239124	0.098765	0.0318224	0.0390491	0.030897	0.0471316	0.606255	0.132814	0.126184	0.183251	0.162225	0.156808	0.118631
D_0__Bacteria;D_1__Planctomycetes;D_2__Phycisphaerae	0.176279	0.267912	0.253286	0.266463	0.298982	0.314753	0.581758	0.627072	0.281812	0.44245	0.495327	0.551935	0.823517	1.03591
D_0__Bacteria;D_1__Planctomycetes;D_2__Planctomycetacia	0.0883849	0.163943	1.23539	1.08217	1.02591	0.70357	1.11451	1.29736	1.60098	1.5836	1.75826	1.32569	1.968	1.71112
D_0__Bacteria;D_1__Proteobacteria;D_2__Alphaproteobacteria	0.590674	0.663557	12.7456	14.3488	11.2085	11.2594	13.4741	13.8984	14.0364	18.0923	16.0448	15.8181	15.435	13.891
D_0__Bacteria;D_1__Proteobacteria;D_2__Deltaproteobacteria	0.00168706	0.00656211	3.25366	3.08169	5.23825	6.09164	5.58157	6.71391	3.82921	3.48647	4.30085	5.28575	5.02913	5.52956
D_0__Bacteria;D_1__Proteobacteria;D_2__Gammaproteobacteria	0.0166002	0.0460334	10.5367	22.4491	15.208	18.0471	19.0989	10.7997	12.8035	15.4408	15.3215	16.3088	12.7695	10.303
D_0__Bacteria;D_1__Rokubacteria;D_2__NC10	0.41186	0.509622	0.599298	0.355973	0.303768	0.276908	0.275127	0.258459	0.622534	0.379357	0.35254	0.267243	0.356582	0.277134
D_0__Bacteria;D_1__Verrucomicrobia;D_2__Verrucomicrobiae	0.00224219	0.00901645	1.07974	0.569149	0.598245	1.03716	0.741014	0.929086	1.20838	1.04921	1.65246	1.68665	1.68194	1.73232
D_0__Bacteria;__;__	0.128982	0.21594	0.470412	0.925989	0.581571	0.167723	0.557197	0.550948	0.279762	0.315149	0.4435	0.368401	0.678917	0.427998
Unassigned;__;__	0.324704	0.419004	0.075558	0.171402	0	0.0721016	0.108773	0	0.183576	0.0850001	0.264526	0.154302	0.124048	0.0746494
