# Supplementary material for: Two Distinct Soil Disinfestations Differently Modify the Bacterial Communities in a Tomato Field
Source: MDPI journal article supplement (doi:10.3390/agronomy11071375), 2021-07-07
Supplement: s1 [file s1 › Supplemental Table S3.xlsx]

## Sheet: Supplemental Table S3
Supplemental Table S3. Relative abundances of the predicted pathways in the soil samples under reductive soil disinfestation (RSD) and soil solarization (SS). The P-value and false discovery rate (FDR) were calculated by ALDEx2 analysis to detect differentially abundant pathways between RSD and SS. 0–5 w, treatment period for 0 to 5 weeks.
The predicted pathways			ALDEx2 (RSD vs SS)		Relative abundance (%)
Level_1	Level_2	Level_3	p-value	FDR	RSD_0w	RSD_1w	RSD_2w	RSD_3w	RSD_4w	RSD_5w	SS_0w	SS_1w	SS_2w	SS_3w	SS_4w	SS_5w
Biosynthesis	Cofactor, Prosthetic Group, Electron Carrier, and Vitamin Biosynthesis	Vitamin Biosynthesis	0.517072	0.571991	6.12842	6.55344	6.8399	6.7234	6.50991	6.08057	6.11963	6.11986	5.98081	6.2268	6.04896	5.97748
Degradation/Utilization/Assimilation	Aromatic Compound Degradation	4-hydroxyphenylacetate degradation	0.690657	0.734442	0.0237219	0.0442002	0.0268256	0.0259607	0.0174748	0.0223083	0.03362	0.029998	0.0226724	0.0245518	0.0203554	0.0198922
Biosynthesis	Secondary Metabolite Biosynthesis	Siderophore Biosynthesis	4.44193e-06	7.14417e-05	0.0926477	0.107141	0.0827021	0.0865058	0.0987645	0.149912	0.127667	0.125704	0.155851	0.148193	0.155227	0.151948
Superpathways	superpathway of chorismate metabolism	superpathway of chorismate metabolism	0.000813497	0.00349847	0.17491	0.193324	0.159188	0.163606	0.156615	0.157768	0.181747	0.185758	0.19643	0.178715	0.180989	0.166293
Generation of Precursor Metabolite and Energy	Fermentation	Fermentation to Short-Chain Fatty Acids	0.34278	0.408849	3.48097	3.21434	3.38835	3.15238	3.11567	3.29099	3.02982	2.87735	2.86396	2.7727	2.83752	2.83065
Generation of Precursor Metabolite and Energy	Glycolysis	glycolysis III (from glucose)	0.00808823	0.0190057	0.539539	0.558152	0.593749	0.600361	0.58784	0.594155	0.587459	0.583251	0.590314	0.613984	0.606962	0.638744
Biosynthesis	Amine and Polyamine Biosynthesis	superpathway of arginine and polyamine biosynthesis	0.765693	0.798987	0.266881	0.27924	0.272643	0.267622	0.276087	0.277511	0.24941	0.260673	0.249138	0.252624	0.256137	0.235774
Degradation/Utilization/Assimilation	Amino Acid Degradation	Proteinogenic Amino Acid Degradation	0.0512203	0.083744	1.40305	1.52269	1.2544	1.31968	1.28826	1.29456	1.35817	1.43321	1.42344	1.3073	1.27133	1.22093
Biosynthesis	Amino Acid Biosynthesis	Proteinogenic Amino Acid Biosynthesis	0.0477395	0.080028	13.118	13.1665	13.507	13.5059	13.3574	13.4473	13.0742	13.3133	13.2225	13.4165	13.4029	13.5685
Biosynthesis	Aromatic Compound Biosynthesis	Chorismate Biosynthesis	0.0573085	0.0928756	1.10857	1.07053	1.1375	1.16105	1.14615	1.16196	1.10801	1.0954	1.10606	1.14438	1.15479	1.19594
Biosynthesis	Amino Acid Biosynthesis	superpathway of L-aspartate and L-asparagine biosynthesis	1.16944e-06	2.84165e-05	0.32384	0.211874	0.25153	0.247082	0.225644	0.241333	0.161061	0.14641	0.142559	0.145973	0.156045	0.147984
Degradation/Utilization/Assimilation	Aromatic Compound Degradation	anaerobic aromatic compound degradation (Thauera aromatica)	0.377913	0.431825	0	0.000256375	0.000530279	0.0014962	0	0	0	0	7.75222e-05	0	0	0
Biosynthesis	Amino Acid Biosynthesis	superpathway of branched chain amino acid biosynthesis	0.000871931	0.00376046	0.725751	0.743186	0.761617	0.776479	0.774466	0.782192	0.796158	0.80545	0.809819	0.83249	0.828774	0.855527
Degradation/Utilization/Assimilation	C1 Compound Utilization and Assimilation	CO2 Fixation	0.394109	0.464462	1.7296	1.7376	1.94192	1.94412	1.86244	1.90418	1.70686	1.70037	1.66206	1.81209	1.79992	1.97234
Generation of Precursor Metabolite and Energy	Photosynthesis	Calvin-Benson-Bassham cycle	0.0218238	0.0414206	0.56343	0.575282	0.602502	0.603707	0.584771	0.587708	0.588242	0.58469	0.584769	0.602251	0.603333	0.625277
Biosynthesis	Carbohydrate Biosynthesis	Sugar Biosynthesis	0.000205887	0.00126734	4.39011	4.61953	4.60267	4.73314	4.71446	4.65097	4.97493	5.02057	5.05792	5.09617	5.14144	5.25108
Degradation/Utilization/Assimilation	Aromatic Compound Degradation	Catechol Degradation	0.161588	0.223868	0.616872	0.477668	0.394508	0.379155	0.400644	0.445924	0.42741	0.408809	0.402819	0.321399	0.352447	0.315954
Degradation/Utilization/Assimilation	Aromatic Compound Degradation	Benzoyl-CoA Degradation	0.90759	0.923131	0.000989573	0.00755012	0.00391033	0.00714332	0.00239789	0.00108551	0.00421015	0.00215118	0.00344462	0.00471983	0.00136689	0.00217844
Generation of Precursor Metabolite and Energy	Fermentation	Fermentation of Pyruvate	0.139675	0.195589	3.27902	3.18029	3.43603	3.20001	3.12836	3.32148	2.85581	2.77403	2.7496	2.7366	2.80034	2.7919
Biosynthesis	Cofactor, Prosthetic Group, Electron Carrier, and Vitamin Biosynthesis	Porphyrin Compound Biosynthesis	0.00965326	0.0214304	1.93911	1.82309	1.79071	1.7582	1.87011	1.7913	1.90137	1.89012	1.90687	1.85571	1.89215	1.85937
Biosynthesis	Cofactor, Prosthetic Group, Electron Carrier, and Vitamin Biosynthesis	Coenzyme A Biosynthesis	0.00606874	0.0156561	0.979759	1.00253	1.05255	1.04672	1.03639	1.01776	1.02143	1.05047	1.05598	1.08416	1.08729	1.11194
Biosynthesis	Carbohydrate Biosynthesis	colanic acid building blocks biosynthesis	0.00299141	0.00936083	0.340656	0.31654	0.313379	0.365595	0.354071	0.347093	0.37095	0.344939	0.352415	0.383679	0.365419	0.395477
Biosynthesis	Amino Acid Biosynthesis	superpathway of aromatic amino acid biosynthesis	0.0353195	0.0625527	0.579377	0.569511	0.605867	0.615687	0.607232	0.612219	0.589882	0.584928	0.592163	0.614637	0.617936	0.642025
Degradation/Utilization/Assimilation	Amine and Polyamine Degradation	Creatinine Degradation	0.750098	0.789711	0.0134932	0.0180301	0.00950001	0.00903425	0.0055264	0.00572229	0.0121373	0.0108808	0.00774555	0.00884837	0.00841654	0.00435493
Degradation/Utilization/Assimilation	Inorganic Nutrient Metabolism	Nitrogen Compound Metabolism	0.655917	0.703852	0.493666	0.423781	0.409176	0.393433	0.400403	0.411049	0.400586	0.392862	0.399019	0.35219	0.367426	0.356213
Generation of Precursor Metabolite and Energy	Respiration	Anaerobic Respiration	0.00224907	0.00669653	0.0771828	0.091347	0.104696	0.128275	0.104315	0.0968456	0.0807764	0.0797893	0.0757985	0.0868464	0.0708304	0.0669695
Biosynthesis	Nucleoside and Nucleotide Biosynthesis	Purine Nucleotide Biosynthesis	0.00638336	0.0161913	8.49527	8.74355	9.1022	9.04415	8.87137	8.76056	8.9795	9.09662	9.04835	9.27649	9.25955	9.42506
Degradation/Utilization/Assimilation	Carboxylate Degradation	Sugar Acid Degradation	0.19089	0.256637	0.440154	0.53807	0.403724	0.417735	0.381364	0.409378	0.490515	0.44626	0.441686	0.394181	0.386842	0.365515
Degradation/Utilization/Assimilation	Carbohydrate Degradation	Sugar Degradation	0.49209	0.552324	1.46518	1.29679	1.15008	1.20221	1.17002	1.18308	1.27512	1.16174	1.13885	1.02011	1.03395	0.995184
Degradation/Utilization/Assimilation	Secondary Metabolite Degradation	Sugar Derivative Degradation	0.182548	0.244332	1.85301	1.68639	1.52589	1.49906	1.50206	1.65815	1.56274	1.442	1.44185	1.30272	1.33202	1.26138
Biosynthesis	Cell Structure Biosynthesis	Lipopolysaccharide Biosynthesis	0.000210417	0.00130497	0.379804	0.532048	0.447521	0.546123	0.553274	0.420972	0.524566	0.526867	0.562597	0.633974	0.582531	0.544034
Degradation/Utilization/Assimilation	Fatty Acid and Lipid Degradation	Fatty Acid Degradation	0.000370762	0.00197073	0.637541	0.639458	0.590284	0.57722	0.628812	0.627346	0.674283	0.698242	0.681961	0.647419	0.673587	0.670366
Biosynthesis	Fatty Acid and Lipid Biosynthesis	Fatty Acid Biosynthesis	0.00449705	0.0125675	4.74958	5.50534	4.86985	5.12457	5.30684	4.9365	5.22628	5.36158	5.40762	5.49604	5.27436	4.82808
Generation of Precursor Metabolite and Energy	Fermentation	Fermentation to Alcohols	0.724703	0.763633	1.87215	1.99566	2.03407	1.87027	1.82655	1.92759	1.78545	1.77749	1.75062	1.69264	1.72104	1.69173
Superpathways	superpathway of fucose and rhamnose degradation	superpathway of fucose and rhamnose degradation	0.0899092	0.140246	0.00266277	0.010532	0.0107005	0.0119128	0.00643676	0.00447696	0.00474514	0.00505351	0.00457138	0.00460463	0.00463839	0.00325601
Superpathways	superpathway of hexuronide and hexuronate degradation	superpathway of hexuronide and hexuronate degradation	0.000868812	0.0036928	0.0599708	0.0776396	0.0560056	0.0591125	0.0475984	0.0512505	0.0767561	0.0712698	0.0707952	0.0624432	0.0598878	0.0541677
Degradation/Utilization/Assimilation	Aromatic Compound Degradation	Gallate Degradation	0.00143353	0.0053989	0.0145212	0.0292623	0.0116717	0.0168114	0.0160961	0.023149	0.0227395	0.0264502	0.0273116	0.0256156	0.0224474	0.0196327
Degradation/Utilization/Assimilation	Amine and Polyamine Degradation	superpathway of N-acetylglucosamine, N-acetylmannosamine and N-acetylneuraminate degradation	0.0030279	0.00856251	0.0335174	0.0434928	0.0313926	0.0329425	0.0302348	0.040443	0.0319973	0.0267332	0.0224771	0.0241688	0.0248133	0.0242025
Superpathways	superpathway of D-glucarate and D-galactarate degradation	superpathway of D-glucarate and D-galactarate degradation	0.12974	0.187776	0.0104081	0.029213	0.0192342	0.0212998	0.0202744	0.0207997	0.0158826	0.0217787	0.0165147	0.0139685	0.0120475	0.0120367
Biosynthesis	Amino Acid Biosynthesis	Other Amino Acid Biosynthesis	0.00218473	0.00734757	0.497415	0.49927	0.524079	0.517554	0.496132	0.468243	0.514434	0.529109	0.525674	0.541875	0.537732	0.536938
Glycan Pathways	Glycan Degradation	glycogen degradation I	0.00889462	0.0203881	0.295503	0.314133	0.335454	0.370192	0.349336	0.358665	0.345278	0.329087	0.33993	0.372933	0.360509	0.38458
Degradation/Utilization/Assimilation	Carbohydrate Degradation	Polysaccharide Degradation	0.0106114	0.0231379	0.626901	0.689416	0.708014	0.793409	0.730454	0.801898	0.749462	0.713566	0.726567	0.7834	0.755468	0.791567
Biosynthesis	Carbohydrate Biosynthesis	Glycan Biosynthesis	0.445902	0.510122	0.444482	0.425179	0.458753	0.452171	0.433827	0.452042	0.419001	0.405457	0.413263	0.421751	0.43128	0.436939
Biosynthesis	Carbohydrate Biosynthesis	Polysaccharide Biosynthesis	0.443139	0.507213	0.444482	0.425179	0.458753	0.452171	0.433827	0.452042	0.419001	0.405457	0.413263	0.421751	0.43128	0.436939
Degradation/Utilization/Assimilation	Alcohol Degradation	superpathway of glycol metabolism and degradation	0.101804	0.154244	0.000799671	0.00482733	0.00502289	0.00495652	0.00280926	0.00199051	0.00175726	0.00199837	0.00195164	0.00212452	0.00196117	0.00128314
Generation of Precursor Metabolite and Energy	Glycolysis	glycolysis I (from glucose 6-phosphate)	0.0296905	0.0536822	0.542874	0.532809	0.559822	0.557488	0.560878	0.58235	0.55556	0.547151	0.556222	0.568044	0.566755	0.590524
Generation of Precursor Metabolite and Energy	superpathway of glycolysis and the Entner-Doudoroff pathway	superpathway of glycolysis and the Entner-Doudoroff pathway	0.00700576	0.0172063	0.489419	0.461479	0.461629	0.453588	0.468273	0.482613	0.49541	0.479736	0.493564	0.475265	0.483924	0.483058
Generation of Precursor Metabolite and Energy	superpathway of glycolysis, pyruvate dehydrogenase, TCA, and glyoxylate bypass	superpathway of glycolysis, pyruvate dehydrogenase, TCA, and glyoxylate bypass	0.170924	0.23335	0.476284	0.444866	0.443924	0.441237	0.469173	0.469178	0.445085	0.444929	0.452758	0.448663	0.439183	0.431475
Generation of Precursor Metabolite and Energy	glyoxylate cycle	glyoxylate cycle	0.106914	0.156689	0.377196	0.333807	0.310357	0.308253	0.342221	0.340888	0.342541	0.339045	0.338948	0.331296	0.323986	0.306389
Degradation/Utilization/Assimilation	Alcohol Degradation	Glycerol Degradation	0.000132814	0.000901151	0.0107564	0.022658	0.0187831	0.016386	0.0123264	0.00772468	0.00955929	0.0102741	0.008257	0.00671507	0.00513726	0.0040771
Degradation/Utilization/Assimilation	Aromatic Compound Degradation	Phenolic Compound Degradation	4.56147e-06	7.3435e-05	0.171313	0.24038	0.157234	0.16322	0.167976	0.205747	0.230079	0.23908	0.24183	0.218505	0.234147	0.219173
Biosynthesis	Fatty Acid and Lipid Biosynthesis	superpathway of (Kdo)2-lipid A biosynthesis	0.094288	0.145539	0.00698381	0.0496572	0.0259935	0.0263629	0.00536665	0.00305851	0.0138525	0.00534356	0.00652742	0.0096116	0.0112367	0.00106722
Degradation/Utilization/Assimilation	Fatty Acid and Lipid Degradation	phospholipases	0.223985	0.29567	0.00565733	0.00971284	0.00543836	0.00560322	0.00752746	0.00530858	0.00699332	0.00694509	0.00477993	0.00421398	0.00557957	0.00260804
Biosynthesis	Fatty Acid and Lipid Biosynthesis	superpathway of lipopolysaccharide biosynthesis	0.594247	0.642061	6.55192e-05	0.000477976	0	8.67737e-05	6.55372e-05	0	0.000541309	0.000566071	0.000102949	3.6236e-05	3.30014e-05	0
Superpathways	superpathway ofﾂS-adenosyl-L-methionine biosynthesis	superpathway of S-adenosyl-L-methionine biosynthesis	0.0231776	0.0437197	0.466312	0.441966	0.430735	0.413158	0.43444	0.439935	0.453002	0.449447	0.455938	0.425337	0.445533	0.439612
Degradation/Utilization/Assimilation	Aldehyde Degradation	superpathway of methylglyoxal degradation	0.587941	0.64474	0.00122546	0.0100306	0.00602787	0.00724198	0.00235156	0.000177302	0.00278046	0.00227973	0.00207552	0.00127851	0.00101998	0.001244
Degradation/Utilization/Assimilation	Aromatic Compound Degradation	methylgallate degradation	0.078934	0.124468	0.00905669	0.0196277	0.00773413	0.0125466	0.0158345	0.0203062	0.0141243	0.0163917	0.0169217	0.0161037	0.0139168	0.0123743
Biosynthesis	Cofactor, Prosthetic Group, Electron Carrier, and Vitamin Biosynthesis	NAD Metabolism	0.00254915	0.00817435	0.943821	0.958558	0.903787	0.920972	0.899723	0.907163	0.971685	0.972567	0.977526	0.958938	0.950751	0.91384
Biosynthesis	Fatty Acid and Lipid Biosynthesis	lipid IVA biosynthesis (E. coli)	5.84969e-05	0.000513019	0.183096	0.229838	0.205031	0.256619	0.27267	0.208937	0.25242	0.256218	0.275509	0.31209	0.283032	0.270087
Biosynthesis	Secondary Metabolite Biosynthesis	Terpenoid Biosynthesis	0.0078112	0.0184095	1.80542	1.7881	1.87375	1.85013	1.76124	1.72053	1.8603	1.85404	1.85239	1.86595	1.83121	1.81556
Generation of Precursor Metabolite and Energy	Pentose Phosphate Pathways	pentose phosphate pathway (non-oxidative branch)	0.279623	0.347632	0.794345	0.720622	0.758176	0.759534	0.735915	0.76243	0.729024	0.709474	0.714629	0.712252	0.735828	0.757789
Metabolic Clusters	O-antigen building blocks biosynthesis (E. coli)	O-antigen building blocks biosynthesis (E. coli)	0.00180439	0.00636563	0.448783	0.478146	0.494362	0.501979	0.500078	0.498467	0.5021	0.510979	0.512706	0.527339	0.521574	0.53915
Degradation/Utilization/Assimilation	Amine and Polyamine Degradation	superpathway of ornithine degradation	0.0166622	0.033465	0.0275434	0.0431128	0.0254922	0.0223585	0.0165708	0.0150381	0.0222295	0.0344198	0.026555	0.0119278	0.00637496	0.00682629
Biosynthesis	Amine and Polyamine Biosynthesis	ectoine biosynthesis	0.0195291	0.0380789	0.0755253	0.0666867	0.0563391	0.0511046	0.0523951	0.0571549	0.0910565	0.0713205	0.066284	0.0659565	0.0578281	0.047748
Generation of Precursor Metabolite and Energy	TCA cycle	TCA cycle IV (2-oxoglutarate decarboxylase)	0.00938046	0.0209848	0.592119	0.567963	0.552978	0.548801	0.585362	0.579569	0.587475	0.592998	0.596449	0.58383	0.581671	0.573179
Degradation/Utilization/Assimilation	Carboxylate Degradation	Fermentation to Acetate	0.00329468	0.00879319	1.06713	1.03844	1.17316	1.03509	0.934484	0.998876	0.902862	0.840364	0.801435	0.780917	0.77587	0.781713
Biosynthesis	Other Biosynthesis	Butanediol Biosynthesis	0.000486414	0.00226743	0.177226	0.123432	0.125664	0.10568	0.11513	0.130137	0.10639	0.0943795	0.0872495	0.0641724	0.085744	0.0726663
Generation of Precursor Metabolite and Energy	Fermentation	purine nucleobases degradation I (anaerobic)	0.00171868	0.00623287	0.212153	0.250743	0.240956	0.274666	0.292407	0.319541	0.280141	0.271844	0.287294	0.307145	0.304973	0.33338
Degradation/Utilization/Assimilation	Nucleoside and Nucleotide Degradation	Purine Nucleotide Degradation	0.0133027	0.0275498	2.45983	2.47231	2.4588	2.45035	2.49998	2.7332	2.59725	2.56458	2.56539	2.5201	2.56373	2.65207
Degradation/Utilization/Assimilation	Aromatic Compound Degradation	Protocatechuate Degradation	9.75289e-06	0.000127506	0.215739	0.23346	0.17666	0.166382	0.17086	0.193722	0.250434	0.256944	0.258549	0.221533	0.228753	0.20992
Degradation/Utilization/Assimilation	Degradation/Utilization/Assimilation - Other	octane oxidation	5.60729e-05	0.000496638	0.0655905	0.0806234	0.057927	0.0492959	0.0543267	0.0497682	0.100941	0.0972577	0.0807908	0.0554664	0.0698895	0.0651229
Biosynthesis	Cofactor, Prosthetic Group, Electron Carrier, and Vitamin Biosynthesis	coenzyme B biosynthesis	0.0528239	0.0886542	0.00132069	0.00197851	0.00305564	0.00498148	0.00508191	0.00614085	0.00401967	0.00306941	0.00397805	0.00394183	0.0049665	0.00492347
Biosynthesis	Cofactor, Prosthetic Group, Electron Carrier, and Vitamin Biosynthesis	Coenzyme M Biosynthesis	0.522543	0.584614	0.00883616	0.0083362	0.00809267	0.00984568	0.01024	0.0252641	0.0134797	0.0115813	0.0101317	0.00945447	0.0107478	0.0092039
Generation of Precursor Metabolite and Energy	Glycolysis	glycolysis V (Pyrococcus)	0.173899	0.229399	0.000841909	0.000506197	0.00279163	0.0046384	0.00407278	0.00639917	0.00138945	0.00100162	0.000744889	0.0010405	0.000974116	0.000448593
Biosynthesis	Amino Acid Biosynthesis	superpathway of L-lysine, L-threonine and L-methionine biosynthesis I	0.00173954	0.00616683	0.441919	0.474884	0.465001	0.45861	0.460951	0.452726	0.479392	0.488259	0.487266	0.477748	0.477691	0.471644
Degradation/Utilization/Assimilation	Carboxylate Degradation	superpathway of N-acetylneuraminate degradation	0.000376282	0.00178102	0.0882039	0.113534	0.0900287	0.0914812	0.0831	0.105345	0.0805554	0.0714035	0.0603006	0.0646771	0.0656818	0.064226
Degradation/Utilization/Assimilation	Degradation/Utilization/Assimilation - Other	nylon-6 oligomer degradation	0.232299	0.301934	0.0053251	0.00551849	0.00433114	0.00287425	0.00232567	0.00169906	0.00546035	0.00565538	0.00378126	0.00296004	0.00293419	0.00230184
Generation of Precursor Metabolite and Energy	Pentose Phosphate Pathways	pentose phosphate pathway	0.02797	0.0511671	0.630848	0.533771	0.516488	0.516982	0.546721	0.556794	0.581904	0.555376	0.566284	0.535347	0.563745	0.568908
Biosynthesis	Cell Structure Biosynthesis	Cell Wall Biosynthesis	0.0472624	0.0795123	2.9362	2.81076	2.9341	2.8064	2.77234	2.79523	2.87596	2.86919	2.8336	2.80504	2.7973	2.86595
Biosynthesis	Fatty Acid and Lipid Biosynthesis	Phospholipid Biosynthesis	0.00464057	0.0130812	3.08344	3.14996	3.29818	3.31017	3.27863	3.28409	3.27804	3.32775	3.34586	3.43734	3.46655	3.5709
Biosynthesis	Amine and Polyamine Biosynthesis	superpathway of polyamine biosynthesis II	0.0174224	0.0342853	0.154573	0.163045	0.142034	0.145208	0.145486	0.140745	0.151553	0.158925	0.15393	0.14717	0.153691	0.138143
Biosynthesis	Amine and Polyamine Biosynthesis	superpathway of polyamine biosynthesis I	0.283791	0.347754	0.182969	0.196154	0.185545	0.181526	0.190756	0.190743	0.165547	0.174883	0.164798	0.16696	0.168801	0.150355
Biosynthesis	Cofactor, Prosthetic Group, Electron Carrier, and Vitamin Biosynthesis	Polyprenyl Biosynthesis	2.19714e-05	0.000246174	1.04636	1.04232	1.04292	1.05601	1.03888	1.04307	1.1866	1.1541	1.18189	1.18045	1.16297	1.16746
Biosynthesis	Metabolic Regulator Biosynthesis	ppGpp metabolism	0.459942	0.526635	0.0839226	0.154121	0.119963	0.126606	0.141465	0.0694081	0.111265	0.132563	0.125151	0.12052	0.0902757	0.0771355
Superpathways	superpathway of histidine, purine, and pyrimidine biosynthesis	superpathway of histidine, purine, and pyrimidine biosynthesis	0.00911369	0.0203073	0.15502	0.360101	0.412567	0.397909	0.294671	0.276543	0.239408	0.252802	0.185003	0.255308	0.179412	0.187129
Biosynthesis	Cofactor, Prosthetic Group, Electron Carrier, and Vitamin Biosynthesis	Quinol and Quinone Biosynthesis	0.00730196	0.0176511	4.28197	4.03794	3.84265	3.88236	4.02008	3.98176	4.11928	4.09976	4.25873	4.12724	4.20192	4.20461
Degradation/Utilization/Assimilation	Aromatic Compound Degradation	Mandelate Degradation	0.218916	0.290024	0.0198331	0.031118	0.0206443	0.0165906	0.0106788	0.00824812	0.0265112	0.0258119	0.0192115	0.0143367	0.0152579	0.0104858
Degradation/Utilization/Assimilation	Inorganic Nutrient Metabolism	Sulfur Compound Metabolism	0.22965	0.297582	1.18946	1.02808	1.04756	0.982633	1.0409	1.03905	1.0593	1.01364	1.02481	1.00754	1.02496	0.992747
Degradation/Utilization/Assimilation	C1 Compound Utilization and Assimilation	Formaldehyde Assimilation	1.19696e-06	2.96115e-05	0.617187	0.343121	0.393108	0.413111	0.453741	0.52947	0.298963	0.229716	0.243158	0.189179	0.272892	0.25792
Generation of Precursor Metabolite and Energy	Photosynthesis	photorespiration	0.0095776	0.0215026	0.162057	0.197214	0.208029	0.211986	0.223348	0.186928	0.197276	0.198459	0.203133	0.225697	0.211183	0.199847
Degradation/Utilization/Assimilation	C1 Compound Utilization and Assimilation	superpathway of C1 compounds oxidation to CO2	0.023857	0.0448557	0.013878	0.0173889	0.0129627	0.011096	0.010814	0.00965686	0.0168019	0.0169847	0.0155041	0.0107694	0.0125791	0.0105767
Generation of Precursor Metabolite and Energy	Entner-Duodoroff Pathways	Entner-Doudoroff pathway III (semi-phosphorylative)	0.707198	0.747799	0.00941504	0.00904721	0.00502758	0.00398541	0.00308391	0.00291594	0.0113364	0.0122855	0.00960478	0.00504907	0.00594018	0.00344154
Degradation/Utilization/Assimilation	Amine and Polyamine Degradation	Glycine Betaine Degradation	0.000247951	0.00145781	0.0183577	0.0301551	0.0148591	0.0146997	0.0116063	0.0106522	0.0313563	0.0324904	0.0311668	0.0212249	0.0282153	0.0133934
Generation of Precursor Metabolite and Energy	Electron Transfer	aerobic respiration I (cytochrome c)	4.99435e-05	0.000447887	1.56801	1.50586	1.51866	1.5062	1.5984	1.60786	1.74801	1.72805	1.75994	1.74585	1.76674	1.82049
Generation of Precursor Metabolite and Energy	Respiration	Aerobic Respiration	4.83547e-05	0.000438182	1.56801	1.50586	1.51866	1.5062	1.5984	1.60786	1.74801	1.72805	1.75994	1.74585	1.76674	1.82049
Degradation/Utilization/Assimilation	Nucleoside and Nucleotide Degradation	S-methyl-5-thio-α-D-ribose 1-phosphate degradation	3.80165e-06	6.07027e-05	0.111562	0.04903	0.055017	0.0530244	0.0655217	0.0837024	0.0350958	0.0305312	0.0282526	0.0217881	0.0331126	0.0328915
Degradation/Utilization/Assimilation	Amine and Polyamine Degradation	4-Aminobutanoate Degradation	0.312267	0.382365	0.469903	0.294269	0.288324	0.285159	0.336088	0.36715	0.315057	0.282315	0.289085	0.254462	0.28312	0.284008
Degradation/Utilization/Assimilation	Carboxylate Degradation	glutaryl-CoA degradation	0.0356454	0.059118	0	0.00582892	0.00857042	0.0105016	0.00712269	0.000656204	0.000177797	0.000256112	0.000184719	0.00327912	0.000140268	0.000269585
Degradation/Utilization/Assimilation	Aromatic Compound Degradation	Toluene Degradation	0.310862	0.381452	0.551392	0.427009	0.362528	0.342409	0.35572	0.42302	0.392277	0.368218	0.363653	0.300577	0.333983	0.316087
Biosynthesis	Cofactor, Prosthetic Group, Electron Carrier, and Vitamin Biosynthesis	Tetrapyrrole Biosynthesis	0.00173933	0.00616691	1.03181	1.06104	1.08709	1.05051	1.03539	1.01001	1.08476	1.1117	1.1056	1.10466	1.12437	1.10691
Biosynthesis	Cofactor, Prosthetic Group, Electron Carrier, and Vitamin Biosynthesis	factor 420 biosynthesis	0.093456	0.143714	0.0141305	0.0106928	0.0139647	0.0182221	0.0174083	0.0228435	0.0190757	0.0126611	0.011232	0.00896917	0.0148073	0.00871616
Degradation/Utilization/Assimilation	Aromatic Compound Degradation	p-cymene degradation	0.370894	0.439379	0.0758371	0	0	0.0652446	0.122039	0.136395	0	0.034068	0.104911	0.0837404	0.0674598	0.0930344
Degradation/Utilization/Assimilation	Aromatic Compound Degradation	p-cumate degradation	0.372871	0.441975	0.0758371	0	0	0.0652446	0.122039	0.136395	0	0.034068	0.104911	0.0837404	0.0674598	0.0930344
Degradation/Utilization/Assimilation	Aromatic Compound Degradation	Naphthalene Degradation	0.474937	0.524738	0	4.36702e-05	1.87169e-05	2.63161e-05	1.94628e-05	0	0	2.15871e-05	0	0	0	0
Degradation/Utilization/Assimilation	Aromatic Compound Degradation	Benzoate Degradation	0.911987	0.925577	0.0237933	0.0397455	0.0225171	0.0271238	0.0124839	0.0166372	0.0289988	0.023708	0.0248539	0.0165379	0.0145432	0.0145199
Generation of Precursor Metabolite and Energy	Glycolysis	glycolysis II (from fructose 6-phosphate)	0.10149	0.150087	0.529219	0.493886	0.511052	0.502282	0.516812	0.543451	0.508673	0.497032	0.508416	0.508723	0.509627	0.52441
Degradation/Utilization/Assimilation	Cofactor, Prosthetic Group, Electron Carrier Degradation	vitamin B6 degradation	0.590238	0.637501	5.92172e-05	0	0	0	0	0	4.09713e-05	0	0	0	0	0
Metabolic Clusters	L-glutamate and L-glutamine biosynthesis	L-glutamate and L-glutamine biosynthesis	0.248644	0.316617	0.239896	0.255038	0.271836	0.314805	0.281324	0.302002	0.246235	0.22888	0.22926	0.263615	0.228293	0.241368
Degradation/Utilization/Assimilation	Nucleoside and Nucleotide Degradation	nucleoside and nucleotide degradation (archaea)	0.279655	0.343573	0.000219906	0.000162131	0.00217198	0.00324633	0.00362795	0.00439291	0.000854508	0.000806181	0.000443323	0.000670165	0.000635835	0.000340542
Degradation/Utilization/Assimilation	Aromatic Compound Degradation	Nitroaromatic Compound Degradation	0.020677	0.0393195	0.111695	0.0585542	0.0545236	0.0537608	0.0622826	0.0718412	0.0509989	0.0492665	0.0597963	0.0465606	0.0444674	0.0356756
Degradation/Utilization/Assimilation	Carboxylate Degradation	2-amino-3-carboxymuconate semialdehyde degradation to 2-hydroxypentadienoate	0.0189976	0.036673	0.112634	0.0569263	0.0574741	0.0534807	0.062883	0.0739219	0.0513024	0.0488982	0.0588893	0.0468578	0.0446571	0.0372579
Biosynthesis	Metabolic Regulator Biosynthesis	Organic Solute Biosynthesis	0.000152598	0.000987564	0.00853086	0.00801922	0.00662002	0.0065734	0.00603741	0.00665843	0.0132356	0.00918861	0.00999822	0.00808354	0.0111522	0.00797348
Biosynthesis	Secondary Metabolite Biosynthesis	Antibiotic Biosynthesis	0.00291834	0.00901398	0.00316235	0.00201493	0.00237173	0.00214834	0.00314388	0.00906186	0.00506919	0.0048851	0.00425269	0.00761993	0.00610022	0.00517148
Biosynthesis	Nucleoside and Nucleotide Biosynthesis	Pyrimidine Nucleotide Biosynthesis	0.0188808	0.0368798	5.19869	5.43579	5.68362	5.6524	5.55225	5.48446	5.50518	5.56879	5.51291	5.65119	5.59634	5.75259
Degradation/Utilization/Assimilation	Amine and Polyamine Degradation	Allantoin Degradation	0.69147	0.732496	0.0648601	0.073645	0.0582304	0.0652458	0.0604492	0.0726306	0.0687854	0.0660598	0.0590915	0.060435	0.0606383	0.0522429
Generation of Precursor Metabolite and Energy	ethylmalonyl-CoA pathway	ethylmalonyl-CoA pathway	4.00367e-08	4.72435e-06	0.0668969	0.0691355	0.0636739	0.0643192	0.0664467	0.0630177	0.0833129	0.0894757	0.0868292	0.0897173	0.0943823	0.0910004
Degradation/Utilization/Assimilation	Degradation/Utilization/Assimilation - Other	glyoxylate assimilation	0.571229	0.626743	0.00231338	0.00318674	0.00175887	0.00271435	0.00254386	0.000790021	0.00147705	0.0029336	0.00345296	0.00300012	0.00359891	0.0021532
Degradation/Utilization/Assimilation	Carboxylate Degradation	Propanoate Degradation	0.245853	0.316122	0.106988	0.171325	0.131432	0.139329	0.17293	0.109397	0.14571	0.156935	0.1448	0.141657	0.120333	0.100355
Generation of Precursor Metabolite and Energy	TCA cycle	partial TCA cycle (obligate autotrophs)	0.0151111	0.0307823	0.437658	0.373874	0.346179	0.354023	0.407527	0.402734	0.404612	0.393702	0.417701	0.408059	0.402081	0.377536
Glycan Pathways	Glycan Degradation	glycogen degradation II	0.102513	0.154447	0.0440462	0.0427226	0.0348271	0.0332044	0.0346958	0.0871742	0.0642405	0.0538572	0.0453419	0.0399189	0.0450268	0.0416112
Degradation/Utilization/Assimilation	Amine and Polyamine Degradation	superpathway of phenylethylamine degradation	0.000196233	0.00122973	0.0430324	0.0684791	0.041389	0.0427158	0.0421554	0.0507062	0.0558126	0.063223	0.0613004	0.0504004	0.0612699	0.0563314
Degradation/Utilization/Assimilation	Chlorinated Compound Degradation	Chloroaromatic Compound Degradation	0.683646	0.729392	0.00487432	0.00557334	0.00533246	0.00380171	0.00378123	0.00201972	0.00876205	0.00694635	0.00433888	0.00211485	0.00280411	0.00273822
Biosynthesis	Cofactor, Prosthetic Group, Electron Carrier, and Vitamin Biosynthesis	tetrahydromethanopterin biosynthesis	0.526708	0.584136	0.000176903	0.000460711	0.00341415	0.00645789	0.00615477	0.00850143	0.00164276	0.00148599	0.000965555	0.00126518	0.00143721	0.000694032
Degradation/Utilization/Assimilation	Aromatic Compound Degradation	superpathway of salicylate degradation	0.136355	0.19369	0.0238773	0.0402162	0.0254453	0.0264987	0.023957	0.0252114	0.0325721	0.0330235	0.0301203	0.0225446	0.0255606	0.0227597
Degradation/Utilization/Assimilation	Aromatic Compound Degradation	4-methylcatechol degradation (ortho cleavage)	0.0127299	0.0270717	0.0216292	0.0382307	0.0224881	0.0243528	0.0203835	0.0169518	0.0300119	0.0313913	0.0300383	0.0221207	0.0249294	0.0215365
Degradation/Utilization/Assimilation	Aromatic Compound Degradation	2-aminophenol degradation	0.0574967	0.094603	0.0378038	0.0436625	0.0308483	0.0293484	0.0226296	0.0263141	0.0376551	0.0368035	0.0414245	0.0344796	0.0317161	0.0240981
Degradation/Utilization/Assimilation	Aromatic Compound Degradation	Vanillin Degradation	0.00432962	0.0120806	0.0100766	0.0381344	0.0174589	0.0222594	0.016966	0.0313068	0.0197271	0.0348113	0.0349183	0.0286877	0.0254646	0.0290909
Degradation/Utilization/Assimilation	Aromatic Compound Degradation	syringate degradation	0.0120474	0.0258863	0.00829668	0.0249962	0.0104422	0.0162479	0.0170985	0.0211692	0.0160123	0.0226489	0.0224629	0.0181336	0.0171617	0.017685
Detoxification	Antibiotic Resistance	peptidoglycan biosynthesis V (β-lactam resistance)	0.000702516	0.00317163	0.0326567	0.0291446	0.0194716	0.0151374	0.0143656	0.0215786	0.0496719	0.0410582	0.0354523	0.0256588	0.0221582	0.0227775
Detoxification	Antibiotic Resistance	peptidoglycan biosynthesis IV (Enterococcus faecium)	0.00380768	0.011073	0.0478268	0.0520557	0.0394891	0.0291584	0.0232188	0.0303872	0.078467	0.069037	0.0615844	0.0667554	0.0317311	0.0326934
Biosynthesis	Other Biosynthesis	8-Amino-7-oxononanoate Biosynthesis	0.707878	0.748326	0.263762	0.309864	0.261355	0.301262	0.315153	0.26223	0.257563	0.274874	0.276713	0.296146	0.256046	0.22514
Biosynthesis	Nucleoside and Nucleotide Biosynthesis	2'-Deoxyribonucleotide Biosynthesis	0.00505568	0.0138346	2.87448	3.10835	3.22295	3.22415	3.18128	3.08167	3.16337	3.23273	3.19487	3.3115	3.23026	3.27821
Metabolic Clusters	pyrimidine deoxyribonucleotidesﾂde novoﾂbiosynthesis III	pyrimidine deoxyribonucleotides de novo biosynthesis III	0.00494162	0.0134838	0.225249	0.26621	0.337227	0.329677	0.289835	0.298094	0.288131	0.288614	0.308386	0.345443	0.33119	0.357563
Biosynthesis	Amine and Polyamine Biosynthesis	norspermidine biosynthesis	5.57559e-06	7.39244e-05	0.0615899	0.0479256	0.0523222	0.0559224	0.0440442	0.0395128	0.0415581	0.030291	0.0282796	0.0300658	0.0290779	0.0275058
Macromolecule Modification	Nucleic Acid Processing	Queuosine Biosynthesis and Salvage	0.232363	0.301229	0.380606	0.396002	0.433078	0.451007	0.449658	0.434268	0.371393	0.394995	0.403415	0.440405	0.428794	0.450629
Biosynthesis	Secondary Metabolite Biosynthesis	preQ0 biosynthesis	0.0861391	0.130942	0.39529	0.391772	0.406984	0.41359	0.42836	0.39639	0.377508	0.397929	0.397327	0.415934	0.419417	0.415227
Generation of Precursor Metabolite and Energy	methylaspartate cycle	methylaspartate cycle	0.00452768	0.0120149	0.076682	0.0985075	0.0993114	0.0822331	0.0767503	0.095569	0.0838781	0.0646129	0.0538852	0.056834	0.0652818	0.0359266
Generation of Precursor Metabolite and Energy	isopropanol biosynthesis (engineered)	isopropanol biosynthesis (engineered)	0.000187244	0.00120081	0.0421294	0.0438335	0.0332562	0.0247082	0.0246034	0.019076	0.051333	0.0526755	0.046585	0.0322361	0.0450826	0.0368976
Degradation/Utilization/Assimilation	Fatty Acid and Lipid Degradation	Steroid Degradation	0.000409344	0.00210768	0.0200006	0.0260417	0.0204094	0.0211023	0.0224589	0.0208384	0.0273688	0.0275696	0.0266792	0.0244625	0.0233816	0.0293299
Degradation/Utilization/Assimilation	Aromatic Compound Degradation	naphthalene degradation to acetyl-CoA	0.502551	0.552738	0	8.69387e-05	3.73398e-05	5.2521e-05	3.88206e-05	0	0	4.30942e-05	0	0	0	0
Generation of Precursor Metabolite and Energy	TCA cycle	TCA cycle V (2-oxoglutarate:ferredoxin oxidoreductase)	0.000811925	0.00355523	0.678424	0.658057	0.660439	0.664583	0.687452	0.681488	0.714353	0.713771	0.721317	0.7238	0.728125	0.743725
Generation of Precursor Metabolite and Energy	1,5-anhydrofructose degradation	1,5-anhydrofructose degradation	0.0240582	0.0452768	0.0144077	0.0196223	0.0118811	0.00940954	0.00785154	0.00733188	0.018329	0.0181484	0.0134549	0.0106982	0.0123529	0.0107457
Degradation/Utilization/Assimilation	Aromatic Compound Degradation	4-hydroxyacetophenone degradation	0.501758	0.55106	0.000168406	0	0	0	0	0	0.000253903	5.27979e-05	0	0	0	0
Generation of Precursor Metabolite and Energy	methyl ketone biosynthesis (engineered)	methyl ketone biosynthesis (engineered)	1.12278e-05	0.000142464	0.115362	0.115444	0.0883959	0.0667194	0.072976	0.0814694	0.163307	0.146331	0.133556	0.107091	0.107877	0.0992677
Degradation/Utilization/Assimilation	Alcohol Degradation	(S)-propane-1,2-diol degradation	0.101742	0.15454	0.0155481	0.0239252	0.0270135	0.0128696	0.0184532	0.0128983	0.023816	0.0168429	0.0150714	0.00672966	0.0128613	0.00862676
Degradation/Utilization/Assimilation	Secondary Metabolite Degradation	Phenylpropanoid Derivative Degradation	0.399735	0.466905	0.00461406	0.00475868	0.00379615	0.00353741	0.00232305	0.00232485	0.00439686	0.00493143	0.00356147	0.00245335	0.00340964	0.00254705
Metabolic Clusters	pyrimidine deoxyribonucleotidesﾂde novoﾂbiosynthesis I	pyrimidine deoxyribonucleotides de novo biosynthesis I	0.00407882	0.0117337	0.451503	0.475699	0.472816	0.466072	0.47775	0.455971	0.478792	0.493921	0.486492	0.485893	0.480775	0.471832
Degradation/Utilization/Assimilation	Nucleoside and Nucleotide Degradation	Pyrimidine Nucleotide Degradation	0.000222929	0.00122967	0.291539	0.254345	0.310702	0.270468	0.239572	0.266653	0.204544	0.192065	0.183401	0.179026	0.193144	0.202823
Metabolic Clusters	pyrimidine deoxyribonucleotide phosphorylation	pyrimidine deoxyribonucleotide phosphorylation	0.00142214	0.00541987	0.478896	0.477568	0.501395	0.505743	0.509842	0.502703	0.513762	0.519958	0.526292	0.538638	0.546133	0.567228
Metabolic Clusters	pyrimidine deoxyribonucleotidesﾂde novoﾂbiosynthesis IV	pyrimidine deoxyribonucleotides de novo biosynthesis IV	0.343199	0.416685	0.00321509	0.00103007	0.00506981	0.00607722	0.00843118	0.0100181	0.00591478	0.00417428	0.00402808	0.00454503	0.00559658	0.00442947
Metabolic Clusters	pyrimidine deoxyribonucleotides biosynthesis from CTP	pyrimidine deoxyribonucleotides biosynthesis from CTP	0.340754	0.414157	0.00458463	0.00147005	0.00721892	0.00865246	0.011991	0.0142439	0.00842524	0.00595024	0.00574336	0.00647985	0.00797606	0.00631825
Degradation/Utilization/Assimilation	Aromatic Compound Degradation	Nicotinate Degradation	0.150042	0.211939	0.00292972	0.0104058	0.00608507	0.00593274	0.00392941	0.00196427	0.00572306	0.00598547	0.00434391	0.00297823	0.00159451	0.00105232
Generation of Precursor Metabolite and Energy	TCA cycle	TCA cycle VII (acetate-producers)	3.52359e-06	5.65258e-05	0.434955	0.300023	0.306549	0.273333	0.287356	0.316589	0.240841	0.196318	0.189312	0.150682	0.180539	0.171688
Biosynthesis	Secondary Metabolite Biosynthesis	Ergothioneine Biosynthesis	1.80191e-06	4.00527e-05	0.0889548	0.0837163	0.0741618	0.0626772	0.0689946	0.0876275	0.117481	0.109456	0.111453	0.0954774	0.0965955	0.0905224
Macromolecule Modification	Nucleic Acid Processing	7-(3-amino-3-carboxypropyl)-wyosine biosynthesis	0.291549	0.355607	0.000171083	0.000301646	0.0019599	0.00351908	0.00380713	0.0048276	0.000881516	0.000733877	0.000509859	0.000584834	0.000779216	0.000351722
Biosynthesis	Cofactor, Prosthetic Group, Electron Carrier, and Vitamin Biosynthesis	cob(II)yrinate a,c-diamide biosynthesis	0.412255	0.474926	0.193045	0.22832	0.234743	0.203603	0.188724	0.197696	0.206611	0.199928	0.181719	0.167611	0.184668	0.162666
Biosynthesis	Secondary Metabolite Biosynthesis	Phenylpropanoid Derivative Biosynthesis	0.00612067	0.0130936	0.00231783	0.0004316	5.24853e-05	0.000908599	0	0.000174591	0.00508146	0.00136636	0.00200784	0.0020292	0.00201513	0.000467201
Generation of Precursor Metabolite and Energy	Fermentation	crotonate fermentation (to acetate and cyclohexane carboxylate)	0.0188726	0.0335796	0	0.000562947	0.00139434	0.00121389	0.000830191	0.000129756	0	0	0.000120846	0	0	0
Generation of Precursor Metabolite and Energy	Fermentation	benzoate fermentation (to acetate and cyclohexane carboxylate)	0.405373	0.454766	0	0.000331009	0.000298156	0.00070213	0	0	0	0	7.78221e-05	0	0	0
Degradation/Utilization/Assimilation	Amine and Polyamine Degradation	aromatic biogenic amine degradation (bacteria)	0.000120067	0.000864286	0.250949	0.22465	0.189111	0.163057	0.189206	0.21818	0.245616	0.268336	0.2827	0.237611	0.254225	0.233968
Degradation/Utilization/Assimilation	Alcohol Degradation	methanol oxidation to carbon dioxide	0.000753372	0.00335293	0.0640269	0.0518374	0.040502	0.0330256	0.0333927	0.0515352	0.0788497	0.063088	0.0631284	0.0483822	0.0524011	0.047383
Degradation/Utilization/Assimilation	Aromatic Compound Degradation	3-phenylpropanoate and 3-(3-hydroxyphenyl)propanoate degradation	0.00533003	0.014102	0.0575683	0.0456709	0.0417053	0.0393024	0.0448291	0.0491174	0.0654525	0.053785	0.0501601	0.0482228	0.0507684	0.0453948
Degradation/Utilization/Assimilation	Nucleoside and Nucleotide Degradation	superpathway of purine deoxyribonucleosides degradation	0.00820368	0.0181122	0.337834	0.291434	0.333175	0.279788	0.264074	0.296002	0.254679	0.237353	0.227244	0.210322	0.231837	0.235414
Detoxification	Antibiotic Resistance	polymyxin resistance	0.00239918	0.00732582	0.000726415	0.00645514	0.00295601	0.00307965	0.000521725	0.000139034	0.000679927	0.00102301	0.000264895	0.000270804	0.00012035	1.24757e-05
Macromolecule Modification	Nucleic Acid Processing	tRNA processing	0.056492	0.0928412	0.170664	0.225531	0.196232	0.23141	0.226098	0.195053	0.189221	0.224677	0.208697	0.240719	0.20474	0.196988
Degradation/Utilization/Assimilation	Inorganic Nutrient Metabolism	Phosphorus Compound Metabolism	8.12266e-05	0.000643201	0.0736681	0.0880232	0.0698395	0.0769477	0.0825899	0.0822596	0.086315	0.0966216	0.0876806	0.0996857	0.0935917	0.0826708
Superpathways	aspartate superpathway	aspartate superpathway	0.00511398	0.0138176	0.43542	0.459279	0.452985	0.44551	0.450663	0.443046	0.461025	0.468932	0.46545	0.45724	0.463843	0.460586
Biosynthesis	Cofactor, Prosthetic Group, Electron Carrier, and Vitamin Biosynthesis	Reductant Biosynthesis	9.06551e-08	7.24892e-06	0.0924598	0.0838982	0.0724186	0.0614458	0.0692535	0.0882263	0.132697	0.11612	0.120836	0.0995735	0.102632	0.109549
Degradation/Utilization/Assimilation	Aromatic Compound Degradation	biphenyl degradation	0.374977	0.435615	0.000256776	0.000290479	4.11338e-05	0.000172319	0.000495848	0.000337849	0.000330555	0.000142322	0.000314169	0.000106198	0.000328354	0.000107479
Generation of Precursor Metabolite and Energy	TCA cycle	TCA cycle VI (Helicobacter)	0.263839	0.329886	0.670339	0.645838	0.643692	0.641741	0.662609	0.67096	0.651242	0.659767	0.646034	0.590198	0.611535	0.606893
Degradation/Utilization/Assimilation	C1 Compound Utilization and Assimilation	Formaldehyde Oxidation	4.42148e-07	1.85251e-05	0.485431	0.220105	0.247028	0.266661	0.31102	0.366557	0.181795	0.123893	0.139086	0.106086	0.161138	0.148663
Generation of Precursor Metabolite and Energy	formaldehyde oxidation I	formaldehyde oxidation I	4.56498e-07	1.85321e-05	0.485431	0.220105	0.247028	0.266661	0.31102	0.366557	0.181795	0.123893	0.139086	0.106086	0.161138	0.148663
Biosynthesis	Amino Acid Biosynthesis	superpathway of L-serine and glycine biosynthesis I	0.00838185	0.0193904	0.629868	0.592959	0.609364	0.62018	0.620805	0.637724	0.639901	0.622725	0.626612	0.651012	0.651486	0.658188
Generation of Precursor Metabolite and Energy	TCA cycle	TCA cycle I (prokaryotic)	0.000562335	0.00270575	0.668339	0.649075	0.646113	0.655193	0.680173	0.669244	0.707856	0.706764	0.715593	0.719329	0.72115	0.734671
Generation of Precursor Metabolite and Energy	TCA cycle	superpathway of glyoxylate bypass and TCA	0.775106	0.807308	0.441511	0.39092	0.376287	0.371935	0.41329	0.406217	0.372817	0.378746	0.381846	0.371478	0.359791	0.34385
Biosynthesis	Aminoacyl-tRNA Charging	tRNA charging	0.056845	0.0922382	0.483904	0.495035	0.525084	0.522356	0.50296	0.497203	0.488746	0.489555	0.495998	0.517263	0.516146	0.529337
