# Supplementary figures and images for: Two Distinct Soil Disinfestations Differently Modify the Bacterial Communities in a Tomato Field
Source: MDPI journal article supplement (doi:10.3390/agronomy11071375), 2021-07-07

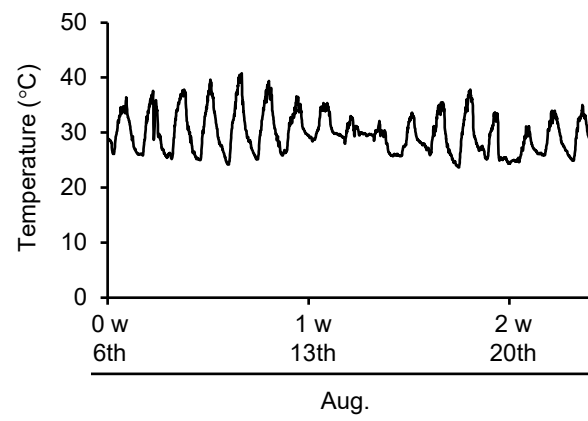

Supplemental Figure S1. Air temperature observed outside the green house.

Supplement: s1 [file s1 › Supplemental Figure S1.pdf]
